# Supplementary material for: Functional genomics analysis of developing zebrafish and human endoderm reveals highly conserved cis-regulatory modules acting during vertebrate organogenesis
Source: HighWire-hosted journal article supplement (doi:10.1101/gr.280838.125), 2026-04-07
Supplement: Supplemental_Tables.xlsx [file Supplemental_Tables.xlsx]

## Sheet: Table S1
Supplemental Table 1: Genes significantly more highly expressed in Sox17E>Sox17N at 28 hpf by RNA-seq
Gene stable ID	Gene name	baseMean	log2FoldChange	lfcSE	stat	pvalue	padj
ENSDARG00000033161	sst1.2	137.462	10.5976	2.65177	3.99642	6.43084e-05	0.00361181
ENSDARG00000014190	sst2	121.281	8.95671	1.64688	5.43859	5.3704e-08	1.88033e-05
ENSDARG00000097241	BX120016.1	71.4986	8.18837	1.68802	4.85087	1.22918e-06	0.000216778
ENSDARG00000099880	sp6	15.1581	7.41718	1.89055	3.9233	8.73432e-05	0.00436875
ENSDARG00000096533	rltgr	13.4704	7.24651	1.73066	4.18715	2.82483e-05	0.00207524
ENSDARG00000040907	gcgb	24.1014	6.61511	1.61827	4.08777	4.35532e-05	0.00276723
ENSDARG00000077084	col28a1a	89.8273	5.96819	0.859565	6.94327	3.83129e-12	1.0508e-08
ENSDARG00000099424	lcat	28.9169	5.89403	1.24096	4.74959	2.03833e-06	0.000338816
ENSDARG00000035350	ins	29.0492	5.84863	1.23742	4.72646	2.28464e-06	0.00036501
ENSDARG00000086261	fhdc4	13.4775	5.75774	1.67927	3.42872	0.000606434	0.0173858
ENSDARG00000045517	itih5	65.7094	5.15197	0.977003	5.27324	1.34039e-07	3.86974e-05
ENSDARG00000030896	foxq1a	16.3741	5.12682	1.40359	3.65266	0.00025954	0.00968479
ENSDARG00000097118	CU693494.2	24.031	5.04349	1.13235	4.45399	8.42907e-06	0.000913488
ENSDARG00000089235	tspearb	41.1475	4.92991	1.20843	4.07959	4.51149e-05	0.00285542
ENSDARG00000002968	a1cf	14.6729	4.88687	1.39834	3.49477	0.000474478	0.0147043
ENSDARG00000015955	cldnc	27.4023	4.82686	1.03768	4.65161	3.29361e-06	0.00048667
ENSDARG00000039806	tbxtb	32.1316	4.81536	1.17553	4.09632	4.19764e-05	0.00271218
ENSDARG00000078552	grhl3	14.5488	4.79532	1.36943	3.50168	0.00046233	0.0144641
ENSDARG00000045887	mmp30	32.0418	4.74126	0.977175	4.85201	1.22218e-06	0.000216778
ENSDARG00000056248	si:dkey-183i3.5	21.991	4.44918	1.13053	3.93549	8.30283e-05	0.00421702
ENSDARG00000038703	hkdc1	23.2642	4.42154	1.11988	3.94821	7.87382e-05	0.00404911
ENSDARG00000100312	hoxa13a	91.6448	4.33029	1.03212	4.19555	2.72216e-05	0.00201783
ENSDARG00000037889	wnt9b	137.901	4.32145	0.597366	7.23416	4.68409e-13	2.56938e-09
ENSDARG00000079296	gcga	20.8541	4.3182	1.08019	3.99762	6.39829e-05	0.00360583
ENSDARG00000020265	angptl6	77.549	4.26854	1.02285	4.17319	3.00371e-05	0.00217749
ENSDARG00000002509	zgc:153911	122.731	4.11951	1.03947	3.96307	7.39915e-05	0.00390188
ENSDARG00000055439	adamtsl7	32.0382	4.08836	1.13072	3.61572	0.000299509	0.010509
ENSDARG00000091783	si:dkeyp-71f10.5	24.8733	4.06614	1.20784	3.36646	0.000761385	0.020274
ENSDARG00000079281	TESK1	19.9344	3.98325	1.05703	3.76833	0.000164342	0.00707961
ENSDARG00000027867	paplna	131.727	3.97788	0.655769	6.06598	1.31155e-09	1.07914e-06
ENSDARG00000076856	frem2a	1161.28	3.95147	0.637638	6.19704	5.75347e-10	5.56936e-07
ENSDARG00000071095	abi3bpb	223.062	3.92716	0.536619	7.31834	2.51066e-13	2.06577e-09
ENSDARG00000045443	agtr1b	19.1051	3.91947	1.32574	2.95644	0.00311209	0.0490542
ENSDARG00000025320	col21a1	83.5674	3.88126	0.937299	4.1409	3.45951e-05	0.00235546
ENSDARG00000089563	sfrp2l	44.7548	3.85908	1.05668	3.65207	0.000260137	0.00968509
ENSDARG00000097575	CU914602.1	14.4184	3.80402	1.1503	3.30699	0.000943052	0.0235134
ENSDARG00000070353	hoxc13a	163.293	3.77448	1.02782	3.67233	0.000240345	0.00923416
ENSDARG00000052652	fermt1	123.447	3.77388	0.623026	6.05734	1.38394e-09	1.08448e-06
ENSDARG00000037278	lrata	27.2088	3.74624	0.932552	4.01719	5.88965e-05	0.00343688
ENSDARG00000090598	pkp1a	19.5276	3.74286	1.12593	3.32424	0.000886596	0.0225849
ENSDARG00000036840	krt15	48.176	3.71999	0.795153	4.67833	2.89221e-06	0.000444805
ENSDARG00000092170	apoc1	226.631	3.6903	0.874318	4.22077	2.43466e-05	0.00185485
ENSDARG00000075521	cpz	160.807	3.68175	0.532922	6.90862	4.89405e-12	1.15052e-08
ENSDARG00000069888	cldna	40.7641	3.67884	0.812059	4.53026	5.89113e-06	0.000714676
ENSDARG00000088717	ecrg4b	102.429	3.65092	0.635477	5.74516	9.18321e-09	5.211e-06
ENSDARG00000105422	si:dkey-1k23.3	17.1478	3.64096	1.1119	3.27454	0.00105832	0.0250948
ENSDARG00000056210	hspa1b	230.224	3.63965	0.90963	4.00124	6.30116e-05	0.00358609
ENSDARG00000004539	ptgs2a	163.598	3.60631	0.513186	7.0273	2.10563e-12	6.93006e-09
ENSDARG00000078605	ptger1a	25.1227	3.54962	0.909835	3.90139	9.56416e-05	0.00472636
ENSDARG00000017128	myofl	307.703	3.5459	0.731203	4.84941	1.23828e-06	0.000216778
ENSDARG00000002847	fndc1	77.0432	3.54496	0.64369	5.50725	3.64493e-08	1.33291e-05
ENSDARG00000076192	ankrd1b	190.413	3.49133	0.872572	4.00119	6.30254e-05	0.00358609
ENSDARG00000016570	prlra	43.7424	3.45935	1.08872	3.17744	0.00148583	0.0308206
ENSDARG00000038964	traf4b	14.7162	3.45919	1.08246	3.19567	0.00139507	0.0296989
ENSDARG00000055416	serpinb1	29.8254	3.44244	0.845371	4.07211	4.65892e-05	0.00290335
ENSDARG00000010758	capn12	512.584	3.44095	0.786392	4.37562	1.2109e-05	0.00117215
ENSDARG00000020811	efemp2b	418.879	3.43535	0.666681	5.15291	2.56475e-07	5.97357e-05
ENSDARG00000019063	fat1b	105.709	3.43326	0.665657	5.1577	2.5e-07	5.97357e-05
ENSDARG00000090268	krtt1c19e	1227.56	3.43205	0.611543	5.61212	1.99862e-08	8.43316e-06
ENSDARG00000079543	dpys	17.5868	3.4318	1.01326	3.3869	0.000706866	0.0192905
ENSDARG00000039133	lamb4	574.587	3.4292	0.478136	7.17202	7.38986e-13	3.04019e-09
ENSDARG00000077982	elf3	64.917	3.42335	0.840435	4.07331	4.63503e-05	0.00290335
ENSDARG00000012944	myhz2	24623.8	3.39759	0.408517	8.31689	9.02986e-17	1.48595e-12
ENSDARG00000004658	zgc:101810	199.355	3.3865	0.592227	5.71824	1.0763e-08	5.90388e-06
ENSDARG00000014670	colgalt2	278.303	3.37588	0.830056	4.06705	4.76124e-05	0.00291805
ENSDARG00000100797	CABZ01076996.1	21.3496	3.36874	1.06392	3.16635	0.00154364	0.0313994
ENSDARG00000092567	si:dkey-61l1.4	112.155	3.33331	0.667624	4.99279	5.95123e-07	0.000120905
ENSDARG00000038151	zgc:92360	130.105	3.32985	0.599175	5.55739	2.73839e-08	1.07293e-05
ENSDARG00000098239	zgc:85932	86.0856	3.32724	0.655471	5.0761	3.85257e-07	8.17269e-05
ENSDARG00000076309	mxra5b	1335.9	3.30658	0.759528	4.35347	1.33999e-05	0.00121401
ENSDARG00000068148	arrdc1a	22.6609	3.28645	0.868201	3.78535	0.000153491	0.00674287
ENSDARG00000068182	crb3b	17.9278	3.28516	0.953013	3.44713	0.000566581	0.0165901
ENSDARG00000076623	col14a1b	421.609	3.28465	0.612719	5.36077	8.28684e-08	2.57299e-05
ENSDARG00000098197	CU633999.1	36.3936	3.28439	0.771709	4.25599	2.08126e-05	0.00172106
ENSDARG00000110141	CU633838.1	22.4001	3.2683	0.873991	3.73951	0.000184377	0.00762337
ENSDARG00000111638	CABZ01040998.1	17.6328	3.25873	1.02405	3.18219	0.00146165	0.0306796
ENSDARG00000021720	col7a1	823.558	3.25618	0.479703	6.78791	1.1377e-11	2.34025e-08
ENSDARG00000102825	olfm2b	29.7553	3.23716	0.79375	4.07831	4.53634e-05	0.00286015
ENSDARG00000078878	METTL21C	77.0417	3.23486	0.624745	5.1779	2.244e-07	5.57182e-05
ENSDARG00000063631	VIT	283.203	3.2277	0.565286	5.70986	1.13072e-08	5.96347e-06
ENSDARG00000061970	lingo3a	71.9622	3.22209	0.715141	4.50553	6.62063e-06	0.000772688
ENSDARG00000079324	ano9b	43.3254	3.21879	0.759752	4.23664	2.26892e-05	0.00178644
ENSDARG00000058381	zgc:171775	294.88	3.19581	0.483812	6.60547	3.96262e-11	5.92808e-08
ENSDARG00000061383	serpinf2b	34.8511	3.18985	0.783499	4.07129	4.67542e-05	0.00290335
ENSDARG00000113572	si:dkey-102c8.3	198.224	3.17991	0.522065	6.09102	1.12191e-09	9.71693e-07
ENSDARG00000102777	thbs4a	85.3464	3.17825	0.802778	3.95906	7.5245e-05	0.00393089
ENSDARG00000034207	cx44.2	21.1395	3.17605	0.880997	3.60507	0.000312074	0.0109037
ENSDARG00000078362	0	645.534	3.17339	0.722347	4.39317	1.11711e-05	0.00112092
ENSDARG00000102332	spint1a	248.742	3.16718	0.474494	6.67485	2.4749e-11	4.52522e-08
ENSDARG00000070352	hoxc12a	147.63	3.16656	0.898573	3.52398	0.000425112	0.0135051
ENSDARG00000042021	mapk12a	83.7151	3.15727	0.616316	5.12281	3.0101e-07	6.7855e-05
ENSDARG00000070857	si:dkey-32e6.6	16.4236	3.14482	0.968126	3.24836	0.00116074	0.0265662
ENSDARG00000045070	itgb3b	160.746	3.14332	0.900539	3.49049	0.000482133	0.0148577
ENSDARG00000068409	vgll4l	67.0053	3.13781	0.589074	5.32669	1.0002e-07	3.04802e-05
ENSDARG00000101986	irf6	61.4822	3.11727	0.593927	5.24857	1.53284e-07	4.27533e-05
ENSDARG00000117557	BX571772.1	30.1858	3.11634	0.858864	3.62845	0.000285132	0.0102225
ENSDARG00000094324	efemp2a	2094.25	3.11197	0.551314	5.64464	1.65524e-08	7.78245e-06
ENSDARG00000014324	sh2d5	13.9203	3.10571	1.03807	2.99183	0.00277312	0.0458136
ENSDARG00000089645	si:ch1073-406l10.2	40.2741	3.10027	0.779147	3.97905	6.91908e-05	0.0037736
ENSDARG00000088975	si:ch211-14k19.8	219.315	3.09686	0.930874	3.32683	0.000878408	0.0224902
ENSDARG00000056767	itgb3a	286.176	3.08262	0.556819	5.53612	3.09242e-08	1.18346e-05
ENSDARG00000041098	barx2	17.3075	3.07141	0.959831	3.19995	0.0013745	0.029375
ENSDARG00000045141	aqp8a.1	23.8591	3.06883	1.03667	2.96027	0.00307369	0.0487289
ENSDARG00000014047	cldn7b	439.001	3.06797	0.469809	6.53026	6.56569e-11	9.00375e-08
ENSDARG00000079372	si:ch211-264f5.6	328.294	3.06706	0.472368	6.49295	8.41715e-11	9.89376e-08
ENSDARG00000079199	megf6a	50.1351	3.04182	0.954885	3.18554	0.00144485	0.0304585
ENSDARG00000002494	itgb6	82.9348	3.02805	0.618931	4.89238	9.96225e-07	0.000184201
ENSDARG00000006112	myof	189.846	3.01808	0.580404	5.19997	1.99316e-07	5.12493e-05
ENSDARG00000068219	b3gnt2l	118.772	3.01539	0.731129	4.12429	3.71885e-05	0.0024877
ENSDARG00000103515	vcana	116.641	3.01025	0.732893	4.10735	4.00218e-05	0.0026344
ENSDARG00000095930	myha	138.205	3.00721	0.557067	5.39829	6.72783e-08	2.17085e-05
ENSDARG00000044001	lgals3b	250.76	2.99734	0.532012	5.63397	1.76106e-08	7.90997e-06
ENSDARG00000035018	thy1	83.5608	2.99369	0.662124	4.52135	6.14467e-06	0.000735207
ENSDARG00000054616	cldni	794.761	2.99116	0.490809	6.09435	1.09885e-09	9.71693e-07
ENSDARG00000062974	itga2.2	112.216	2.98911	0.550826	5.42659	5.74393e-08	1.92902e-05
ENSDARG00000090369	zgc:86896	378.184	2.9889	0.571297	5.23179	1.67879e-07	4.52887e-05
ENSDARG00000078108	dok1a	26.9295	2.98639	0.885483	3.37262	0.000744576	0.0200208
ENSDARG00000061509	tbx3b	26.1863	2.97652	0.946728	3.14401	0.00166649	0.0326862
ENSDARG00000056938	kera	328.355	2.97413	0.534152	5.56796	2.57741e-08	1.03448e-05
ENSDARG00000012467	spint1b	102.354	2.97085	0.559082	5.3138	1.07364e-07	3.19216e-05
ENSDARG00000053232	itgb1b.1	389.572	2.97007	0.529132	5.61309	1.98745e-08	8.43316e-06
ENSDARG00000117419	CABZ01086029.1	20.8558	2.96454	0.949042	3.12372	0.00178583	0.0342512
ENSDARG00000062750	si:ch73-74h11.1	277.032	2.95935	0.56837	5.20673	1.92193e-07	5.10118e-05
ENSDARG00000044167	padi2	664.101	2.95922	0.574384	5.15199	2.57732e-07	5.97357e-05
ENSDARG00000055093	cdh27	118.894	2.95603	0.698439	4.23234	2.31277e-05	0.00180374
ENSDARG00000040295	apoeb	472.509	2.95417	0.599553	4.92728	8.33838e-07	0.000159554
ENSDARG00000012972	cfl1l	717.329	2.95052	0.576293	5.11982	3.05823e-07	6.80085e-05
ENSDARG00000101816	col5a3b	1164.35	2.94901	0.555195	5.31166	1.0863e-07	3.19216e-05
ENSDARG00000012788	foxa3	122.694	2.94442	0.831857	3.53958	0.000400764	0.0130594
ENSDARG00000018757	klf5l	53.6069	2.94067	0.649196	4.52971	5.90641e-06	0.000714676
ENSDARG00000018923	fat2	658.172	2.93921	0.452168	6.50025	8.0186e-11	9.89376e-08
ENSDARG00000057590	si:ch1073-396h14.1	141.074	2.93337	0.517414	5.66928	1.43395e-08	6.94033e-06
ENSDARG00000009401	vcanb	3647.6	2.92942	0.740248	3.95736	7.57841e-05	0.00394653
ENSDARG00000052470	igfbp2a	81.2226	2.92531	0.642389	4.5538	5.26856e-06	0.00065968
ENSDARG00000039577	ptk2bb	175.821	2.91804	0.634079	4.60202	4.18418e-06	0.000573791
ENSDARG00000093931	rflnb	231.513	2.91547	0.785738	3.71048	0.000206863	0.00828259
ENSDARG00000103322	si:ch73-347e22.8	18.3868	2.91521	0.950518	3.06697	0.00216238	0.0381804
ENSDARG00000062222	mxra8a	97.7924	2.91361	0.915436	3.18276	0.0014588	0.0306591
ENSDARG00000018566	flnca	1624.36	2.90121	0.718734	4.03655	5.42423e-05	0.00324586
ENSDARG00000076094	klhl30	40.2677	2.90104	0.880306	3.29548	0.000982521	0.0241621
ENSDARG00000056795	serpine1	186.208	2.8995	0.826823	3.5068	0.000453533	0.0142702
ENSDARG00000077410	myo9b	209.309	2.8977	0.533825	5.42819	5.69273e-08	1.92902e-05
ENSDARG00000075555	adamts17	91.3527	2.89655	0.647407	4.47407	7.67442e-06	0.000861921
ENSDARG00000103311	fbln1	930.257	2.88772	0.756444	3.8175	0.000134811	0.00607795
ENSDARG00000051805	CU469568.1	32.9122	2.88153	0.777151	3.70781	0.000209063	0.00833014
ENSDARG00000073935	wnt6b	23.0209	2.88131	0.850139	3.38923	0.000700904	0.0192434
ENSDARG00000076280	ppp1r1b	43.3035	2.87933	0.725214	3.97032	7.17775e-05	0.00383497
ENSDARG00000077540	f2rl1.2	87.7556	2.87839	0.675356	4.26204	2.02572e-05	0.00170078
ENSDARG00000040306	otomp	95.4639	2.87267	0.909129	3.15981	0.00157874	0.0318003
ENSDARG00000016718	mmp11b	61.5319	2.86926	0.65914	4.35303	1.34267e-05	0.00121401
ENSDARG00000101023	msx2b	143.648	2.86785	0.803308	3.57005	0.000356911	0.0120355
ENSDARG00000078217	cblc	24.4513	2.86079	0.882129	3.24305	0.00118258	0.0268422
ENSDARG00000063295	myh9a	2083.85	2.84847	0.520475	5.47284	4.42877e-08	1.58434e-05
ENSDARG00000000212	krt97	483.858	2.84357	0.80507	3.53208	0.000412307	0.0132082
ENSDARG00000016505	apbb1ip	47.8984	2.84324	0.721883	3.93864	8.19433e-05	0.0041748
ENSDARG00000086539	CABZ01115881.1	44.8148	2.83995	0.693511	4.09503	4.22115e-05	0.00271218
ENSDARG00000005108	oclna	143.554	2.83875	0.588278	4.82552	1.39638e-06	0.000241883
ENSDARG00000014246	jag2a	53.1685	2.8368	0.731482	3.87815	0.000105255	0.00507938
ENSDARG00000054137	adgrg6	97.4187	2.83543	0.812206	3.49102	0.000481186	0.0148577
ENSDARG00000075441	vwa2	272.909	2.8337	0.471998	6.00362	1.92963e-09	1.44336e-06
ENSDARG00000041747	sspn	39.0579	2.82885	0.774788	3.65112	0.000261094	0.0096988
ENSDARG00000028096	cldn23a	39.5055	2.82659	0.876364	3.22536	0.00125815	0.0278657
ENSDARG00000100223	gpa33a	245.427	2.82238	0.511975	5.51273	3.53301e-08	1.32134e-05
ENSDARG00000009133	myo1eb	172.989	2.82199	0.48374	5.83369	5.42145e-09	3.59744e-06
ENSDARG00000044261	si:ch211-243g18.2	172.081	2.82013	0.708782	3.97884	6.92531e-05	0.0037736
ENSDARG00000040944	ntd5	726.934	2.81519	0.691382	4.07182	4.66464e-05	0.00290335
ENSDARG00000032623	rcan3	104.03	2.81367	0.543614	5.17587	2.26855e-07	5.57182e-05
ENSDARG00000063435	trpm4b.2	43.559	2.80964	0.645059	4.35564	1.3268e-05	0.00121401
ENSDARG00000006422	esyt3	27.0432	2.80296	0.780373	3.59182	0.000328376	0.0112578
ENSDARG00000040534	epcam	625.282	2.79751	0.490668	5.70144	1.188e-08	5.96347e-06
ENSDARG00000061173	st14a	323.676	2.79162	0.440584	6.33618	2.35537e-10	2.4225e-07
ENSDARG00000030722	xirp1	596.854	2.78937	0.615134	4.53458	5.77176e-06	0.000708806
ENSDARG00000089441	si:ch211-105c13.3	65.8989	2.78836	0.703239	3.96503	7.3386e-05	0.00388309
ENSDARG00000069946	itga6b	303.06	2.7868	0.469991	5.92946	3.03929e-09	2.17455e-06
ENSDARG00000045219	dkk1b	23.7415	2.7842	0.923788	3.01389	0.00257919	0.043398
ENSDARG00000099088	edar	22.7593	2.77325	0.82274	3.37075	0.000749638	0.0200774
ENSDARG00000071215	palm3	79.0528	2.771	0.605076	4.57959	4.65883e-06	0.000608458
ENSDARG00000097268	CU929145.2	61.8974	2.77023	0.801745	3.45525	0.000549781	0.0163867
ENSDARG00000102948	crb3a	19.7784	2.76623	0.882322	3.13517	0.00171752	0.0334014
ENSDARG00000006615	hnf1ba	50.6906	2.76362	0.625504	4.41823	9.95109e-06	0.00102991
ENSDARG00000105630	alpk3b	246.809	2.76269	0.601823	4.59053	4.42114e-06	0.000591498
ENSDARG00000099448	sh3d21	70.0313	2.74225	0.837965	3.27251	0.00106599	0.0252402
ENSDARG00000039486	bag3	421.342	2.72273	0.664986	4.09442	4.2322e-05	0.00271218
ENSDARG00000093135	si:dkey-117n7.2	58.3084	2.72065	0.642098	4.23712	2.26409e-05	0.00178644
ENSDARG00000093899	BX510657.1	48.3832	2.72053	0.78438	3.46838	0.000523599	0.0157809
ENSDARG00000099960	elovl1a	22.7716	2.71212	0.847804	3.19899	0.00137908	0.0294347
ENSDARG00000080020	il13ra1	38.4406	2.70706	0.806084	3.35829	0.000784269	0.0206495
ENSDARG00000103590	cyp2aa6	56.3223	2.70441	0.599807	4.5088	6.51948e-06	0.000766319
ENSDARG00000075463	mss51	345.048	2.69974	0.616647	4.3781	1.19718e-05	0.00116572
ENSDARG00000078853	arhgef19	75.2322	2.68496	0.647508	4.1466	3.37451e-05	0.00232347
ENSDARG00000101321	CR376800.1	73.5624	2.68213	0.5881	4.56068	5.09891e-06	0.000650447
ENSDARG00000001968	dock5	149.187	2.68199	0.528343	5.07622	3.85012e-07	8.17269e-05
ENSDARG00000091234	si:ch73-335l21.4	123.721	2.6776	0.779127	3.43667	0.000588903	0.017153
ENSDARG00000074646	adamts16	59.0254	2.67745	0.636302	4.20783	2.57832e-05	0.00193365
ENSDARG00000078419	filip1a	71.9616	2.67581	0.764008	3.50233	0.000461213	0.0144566
ENSDARG00000022807	pitpnc1b	46.1188	2.67344	0.661362	4.04232	5.2926e-05	0.00319029
ENSDARG00000013310	map3k15	131.425	2.67298	0.549565	4.86381	1.15148e-06	0.000208229
ENSDARG00000025254	s100a10b	219.199	2.67297	0.627423	4.26023	2.04217e-05	0.00170589
ENSDARG00000012824	itga3b	406.369	2.66593	0.457568	5.82629	5.66727e-09	3.59744e-06
ENSDARG00000078964	esyt2b	85.9089	2.66013	0.642101	4.14285	3.43014e-05	0.00235194
ENSDARG00000115540	cacng4a	27.9384	2.65753	0.775899	3.42509	0.000614585	0.0175547
ENSDARG00000024775	si:ch211-129c21.1	62.7355	2.65493	0.626818	4.23557	2.27973e-05	0.00178644
ENSDARG00000078989	alpk3a	311.922	2.65487	0.73643	3.60506	0.000312084	0.0109037
ENSDARG00000078522	si:ch211-80h18.1	100.849	2.65287	0.826755	3.20878	0.00133301	0.0288253
ENSDARG00000040362	ehd2b	130.877	2.6526	0.586776	4.52063	6.16544e-06	0.000735207
ENSDARG00000036426	zgc:103586	54.2166	2.65258	0.862015	3.07719	0.00208964	0.0374588
ENSDARG00000099371	cygb1	998.06	2.64474	0.398297	6.64012	3.13422e-11	5.15767e-08
ENSDARG00000052405	pak6b	36.078	2.64397	0.794717	3.32694	0.000878068	0.0224902
ENSDARG00000044356	tp63	313.676	2.63974	0.463087	5.70031	1.19588e-08	5.96347e-06
ENSDARG00000055784	ptpn3	82.2387	2.63632	0.583434	4.51864	6.22395e-06	0.000736844
ENSDARG00000038583	abraa	286.236	2.6274	0.886938	2.96233	0.00305324	0.048592
ENSDARG00000022689	itgb1b.2	62.0683	2.6254	0.679169	3.8656	0.000110816	0.00530115
ENSDARG00000060235	mst1ra	58.4767	2.61976	0.68336	3.83365	0.000126257	0.00581985
ENSDARG00000057992	fstb	213.171	2.61839	0.528736	4.95216	7.33926e-07	0.00014378
ENSDARG00000078052	emilin3a	52.1475	2.61635	0.702351	3.72512	0.000195219	0.00791264
ENSDARG00000041339	zgc:92380	314.095	2.61577	0.646792	4.04423	5.24965e-05	0.00317604
ENSDARG00000061391	grhl1	149.219	2.61562	0.851931	3.07023	0.00213892	0.037899
ENSDARG00000078674	hspb9	185.445	2.61504	0.864602	3.02456	0.00248995	0.0422418
ENSDARG00000014465	arhgef25b	91.1454	2.60419	0.654124	3.98119	6.857e-05	0.00376129
ENSDARG00000044655	st14b	32.7168	2.59764	0.752622	3.45146	0.000557568	0.0164469
ENSDARG00000051975	cd99	126.459	2.59686	0.500872	5.18468	2.16381e-07	5.47809e-05
ENSDARG00000088515	st6gal2b	33.0024	2.59076	0.836825	3.09594	0.00196187	0.0358214
ENSDARG00000093627	BX537143.1	68.9182	2.58866	0.802098	3.22736	0.00124937	0.0278208
ENSDARG00000009208	prkcda	69.2161	2.58116	0.608712	4.24036	2.23161e-05	0.00178308
ENSDARG00000043010	camk2d1	164.324	2.57592	0.521618	4.93833	7.87927e-07	0.000152543
ENSDARG00000093699	si:ch73-27e22.4	80.8628	2.57546	0.857946	3.0019	0.00268304	0.0445981
ENSDARG00000101409	CABZ01012957.1	182.691	2.57147	0.868029	2.96243	0.00305225	0.048592
ENSDARG00000018721	npnta	136.305	2.57127	0.523563	4.91111	9.05626e-07	0.000169352
ENSDARG00000032932	cnksr1	71.2657	2.56693	0.558345	4.59739	4.27823e-06	0.00057707
ENSDARG00000027609	hpn	27.9418	2.56559	0.741456	3.46021	0.000539759	0.0161313
ENSDARG00000052039	caspb	39.7363	2.55817	0.757921	3.37525	0.000737496	0.0199281
ENSDARG00000045262	gsnb	432.865	2.55721	0.504119	5.07263	3.92345e-07	8.17269e-05
ENSDARG00000013415	lmna	306.927	2.55618	0.593993	4.30339	1.68207e-05	0.00145685
ENSDARG00000012013	cpa6	97.665	2.55536	0.549488	4.65044	3.31229e-06	0.00048667
ENSDARG00000029168	ppfibp2b	314.265	2.55332	0.593214	4.30421	1.67581e-05	0.00145685
ENSDARG00000051809	btr12	45.3217	2.54941	0.803801	3.1717	0.00151551	0.031174
ENSDARG00000070434	rhov	47.6489	2.54698	0.848196	3.00281	0.00267496	0.0445087
ENSDARG00000104181	tmsb1	275.561	2.54225	0.54809	4.63838	3.51159e-06	0.000506901
ENSDARG00000100698	eva1bb	86.2566	2.53157	0.800376	3.16297	0.00156167	0.0316399
ENSDARG00000034588	scn4ab	148.164	2.53115	0.696562	3.63378	0.000279299	0.0101152
ENSDARG00000002037	pfkfb2b	24.4523	2.53071	0.789623	3.20496	0.00135083	0.0290198
ENSDARG00000116806	CU693479.1	205.289	2.52927	0.785891	3.21835	0.00128929	0.0282889
ENSDARG00000030006	slc6a7	59.4351	2.52468	0.678997	3.71825	0.000200604	0.00809102
ENSDARG00000060435	bnipl	65.3063	2.52365	0.75266	3.35297	0.000799499	0.0209833
ENSDARG00000017036	svilc	348.613	2.52335	0.686792	3.67412	0.000238674	0.00919818
ENSDARG00000016364	gna15.1	34.9573	2.52188	0.730278	3.45332	0.00055373	0.0164469
ENSDARG00000058551	popdc3	91.1102	2.51525	0.780237	3.2237	0.00126545	0.0279519
ENSDARG00000074212	SLC5A10	44.4161	2.51406	0.66029	3.8075	0.000140377	0.00629441
ENSDARG00000012405	col1a1a	42378	2.51019	0.710495	3.53302	0.000410839	0.0132082
ENSDARG00000010478	hsp90aa1.1	3173.81	2.5061	0.680436	3.68309	0.000230426	0.00900688
ENSDARG00000002204	hspb11	116.562	2.50409	0.796277	3.14474	0.00166232	0.0326434
ENSDARG00000090072	CU462878.2	54.0332	2.5033	0.683185	3.66416	0.000248148	0.009409
ENSDARG00000010673	trim16	37.2073	2.50287	0.786295	3.18312	0.00145698	0.0306591
ENSDARG00000092881	BX649294.1	372.486	2.50059	0.535516	4.66949	3.01952e-06	0.000455865
ENSDARG00000015793	creb3l1	250.695	2.49996	0.676934	3.69306	0.000221568	0.00872278
ENSDARG00000039099	aep1	811.454	2.49863	0.558296	4.47545	7.62496e-06	0.000861921
ENSDARG00000002909	tjp3	113.454	2.49842	0.526659	4.74391	2.09632e-06	0.00034497
ENSDARG00000101576	tbxta	98.0076	2.49729	0.681857	3.66248	0.000249783	0.00942758
ENSDARG00000035514	adam28	49.015	2.49716	0.626458	3.98616	6.71508e-05	0.00370816
ENSDARG00000044132	ogna	118.71	2.49547	0.600814	4.15348	3.27453e-05	0.00228329
ENSDARG00000093684	tmem238a	22.7949	2.48702	0.839831	2.96134	0.00306305	0.0486251
ENSDARG00000062579	kremen1	195.885	2.48689	0.462406	5.37816	7.52524e-08	2.38145e-05
ENSDARG00000052556	fgfrl1b	179.634	2.48405	0.531491	4.67373	2.95779e-06	0.00045068
ENSDARG00000003808	aqp3a	410.339	2.48208	0.505077	4.91426	8.91172e-07	0.000168565
ENSDARG00000058605	vsig10	29.1063	2.48017	0.765943	3.23806	0.00120344	0.0270544
ENSDARG00000089162	afap1l1a	58.6183	2.47818	0.61946	4.00054	6.31968e-05	0.00358609
ENSDARG00000057138	zgc:174164	33.5643	2.47078	0.775394	3.18648	0.00144017	0.0304229
ENSDARG00000011245	esrp1	145.697	2.46668	0.579973	4.2531	2.10829e-05	0.00172983
ENSDARG00000103347	cyp2aa3	39.3849	2.466	0.655653	3.76113	0.000169149	0.00718519
ENSDARG00000027017	ppp2r5a	25.3102	2.46527	0.796142	3.09652	0.00195806	0.0358214
ENSDARG00000074415	zgc:171482	24.5583	2.46482	0.802836	3.07015	0.00213953	0.037899
ENSDARG00000097738	AL929222.2	4969.9	2.46365	0.738274	3.33704	0.000846772	0.0219096
ENSDARG00000015293	fam110a	25.2673	2.46343	0.771327	3.19376	0.00140432	0.0297803
ENSDARG00000003395	col4a3	120.164	2.46302	0.713929	3.44995	0.00056069	0.0164469
ENSDARG00000019874	hsph1	226.691	2.46288	0.730717	3.37049	0.00075034	0.0200774
ENSDARG00000062446	neurl2	81.7474	2.46228	0.742688	3.31536	0.000915236	0.0230645
ENSDARG00000079462	si:ch211-131k2.3	162.482	2.46221	0.776211	3.17208	0.00151351	0.031174
ENSDARG00000074677	frem3	2298.2	2.45629	0.551508	4.45377	8.43767e-06	0.000913488
ENSDARG00000069415	col17a1a	159.239	2.4537	0.803935	3.05211	0.00227238	0.0394455
ENSDARG00000037748	slc43a1b	306.021	2.4456	0.718431	3.40408	0.00066387	0.018485
ENSDARG00000101518	CR854829.1	43.4835	2.44075	0.713294	3.4218	0.000622077	0.0176803
ENSDARG00000051861	pkp3a	296.676	2.44073	0.563952	4.3279	1.50538e-05	0.00133906
ENSDARG00000019564	asap2b	222.358	2.44007	0.55364	4.40732	1.04659e-05	0.00106313
ENSDARG00000005526	igfn1.1	502.719	2.43938	0.743044	3.28295	0.00102727	0.0247869
ENSDARG00000018814	esrp2	144.345	2.43601	0.593705	4.10306	4.07725e-05	0.00267311
ENSDARG00000011809	mical1	100.938	2.43548	0.754855	3.22642	0.00125348	0.0278657
ENSDARG00000057606	arl4ca	66.393	2.43488	0.663343	3.67063	0.000241958	0.0092382
ENSDARG00000057113	c6	139.62	2.43068	0.462544	5.25501	1.48016e-07	4.19957e-05
ENSDARG00000104022	gcgra	47.7368	2.42949	0.661106	3.67489	0.000237953	0.00919818
ENSDARG00000054003	rargb	96.2405	2.42889	0.730788	3.32366	0.000888455	0.0225972
ENSDARG00000096454	ap1m2	39.0636	2.42583	0.73475	3.30157	0.000961467	0.023818
ENSDARG00000008772	cacng1a	364.024	2.42486	0.60714	3.9939	6.49957e-05	0.00363477
ENSDARG00000009438	myog	97.5492	2.4205	0.693625	3.48964	0.000483679	0.0148774
ENSDARG00000061941	trpv4	53.5266	2.41938	0.667389	3.62514	0.00028881	0.0102987
ENSDARG00000079834	kdf1a	39.0081	2.41526	0.683764	3.53231	0.00041195	0.0132082
ENSDARG00000026052	ccdc3a	91.3549	2.41044	0.72479	3.32571	0.000881942	0.0225011
ENSDARG00000079327	hmcn2	2890.31	2.41041	0.550061	4.38208	1.1755e-05	0.00115832
ENSDARG00000037943	cpt1cb	78.8864	2.40537	0.694649	3.46271	0.000534764	0.0160293
ENSDARG00000018820	flncb	2560.66	2.40412	0.538314	4.46602	7.96898e-06	0.000886064
ENSDARG00000069692	col7a1l	677.226	2.40179	0.430763	5.57566	2.46588e-08	1.01446e-05
ENSDARG00000102750	cdh1	824.483	2.39941	0.416191	5.76516	8.15795e-09	4.79454e-06
ENSDARG00000088813	ppp1r3ab	111.645	2.39868	0.653601	3.66994	0.000242603	0.00924139
ENSDARG00000037517	slc35c2	487.076	2.39734	0.472507	5.07366	3.90235e-07	8.17269e-05
ENSDARG00000054122	tmem30b	61.1567	2.39603	0.668143	3.5861	0.000335662	0.0114361
ENSDARG00000017320	f11r.1	229.14	2.39423	0.456486	5.24491	1.5636e-07	4.28843e-05
ENSDARG00000058543	lama5	1783.25	2.39244	0.410662	5.8258	5.68385e-09	3.59744e-06
ENSDARG00000036830	krt91	1008.5	2.39011	0.679202	3.519	0.000433174	0.0137347
ENSDARG00000031164	tuba8l2	589.775	2.38366	0.462388	5.1551	2.53494e-07	5.97357e-05
ENSDARG00000006526	fn1b	667.166	2.38275	0.439431	5.42237	5.88156e-08	1.93574e-05
ENSDARG00000011672	sema3b	198.382	2.38225	0.506072	4.70733	2.50981e-06	0.000396268
ENSDARG00000105230	fgf4	70.2269	2.38024	0.624312	3.81258	0.000137523	0.00618326
ENSDARG00000076499	usp53b	47.2537	2.37635	0.752991	3.15589	0.00160011	0.0319927
ENSDARG00000103117	tmprss4a	57.3684	2.37598	0.682145	3.4831	0.000495649	0.0152035
ENSDARG00000043242	si:dkey-222f2.1	60.9177	2.3753	0.619268	3.83565	0.000125231	0.00580509
ENSDARG00000011824	pbxip1b	339.173	2.36426	0.566739	4.1717	3.02339e-05	0.00218215
ENSDARG00000068397	tns2b	518.73	2.35862	0.630132	3.74306	0.000181791	0.00753805
ENSDARG00000016188	SBNO2	202	2.3563	0.459615	5.12668	2.94896e-07	6.74001e-05
ENSDARG00000068191	cdh15	529.194	2.35464	0.51206	4.59836	4.25828e-06	0.00057707
ENSDARG00000005629	smyd2b	718.48	2.35097	0.660735	3.55811	0.000373526	0.0124681
ENSDARG00000091253	smyd1b	1121.41	2.35071	0.595275	3.94895	7.84954e-05	0.00404911
ENSDARG00000098764	musk	113.747	2.35031	0.661125	3.55501	0.000377958	0.0125397
ENSDARG00000075600	si:dkeyp-41f9.3	29.4465	2.34861	0.742356	3.16373	0.00155763	0.0316163
ENSDARG00000074508	si:dkey-28e7.3	98.5279	2.34536	0.54148	4.33138	1.48175e-05	0.0013252
ENSDARG00000010565	aqp4	140.291	2.34427	0.729205	3.21484	0.00130519	0.0285236
ENSDARG00000009544	cldnb	181.467	2.34269	0.53565	4.37355	1.2224e-05	0.00117351
ENSDARG00000021242	mvp	222.812	2.3419	0.511192	4.58126	4.62181e-06	0.000608452
ENSDARG00000053535	lmo7b	123.346	2.34182	0.638368	3.66845	0.000244022	0.00927398
ENSDARG00000087303	cebpd	106.19	2.3381	0.625777	3.73631	0.00018674	0.00768692
ENSDARG00000039066	klhl31	3674.98	2.33753	0.710841	3.2884	0.0010076	0.0245282
ENSDARG00000086778	pdgfba	48.14	2.33203	0.70374	3.31376	0.00092049	0.0231614
ENSDARG00000103612	akt2l	44.4722	2.33043	0.62376	3.7361	0.000186898	0.00768692
ENSDARG00000069473	frem1a	289.938	2.32739	0.614334	3.78848	0.000151571	0.006687
ENSDARG00000011797	tent5bb	108.333	2.32539	0.719255	3.23305	0.00122475	0.027496
ENSDARG00000054619	fras1	2033.29	2.32348	0.41253	5.63227	1.77849e-08	7.90997e-06
ENSDARG00000009262	FAR2	91.7407	2.3208	0.560536	4.14032	3.46815e-05	0.00235546
ENSDARG00000053617	camk2a	57.8804	2.31879	0.639704	3.62479	0.0002892	0.0102987
ENSDARG00000037097	slc7a2	38.9211	2.31736	0.709745	3.26506	0.00109442	0.025582
ENSDARG00000063050	rc3h2	173.365	2.3168	0.68757	3.36955	0.00075291	0.0201135
ENSDARG00000041065	hspb1	786.853	2.3136	0.618118	3.74297	0.000181855	0.00753805
ENSDARG00000041257	smtnl1	101.007	2.31359	0.588938	3.9284	8.55119e-05	0.00431563
ENSDARG00000039455	tspan15	47.247	2.31078	0.678805	3.40418	0.000663621	0.018485
ENSDARG00000079634	filip1b	109.873	2.30917	0.775602	2.97727	0.00290832	0.0470598
ENSDARG00000019418	kcnj2a	50.8171	2.30698	0.759126	3.039	0.00237368	0.0406465
ENSDARG00000025218	myo5ab	139.077	2.30681	0.521332	4.42485	9.65105e-06	0.00101806
ENSDARG00000029457	cacna1sa	354.605	2.30594	0.739271	3.11921	0.00181338	0.0344983
ENSDARG00000000796	nr4a1	336.148	2.29972	0.62013	3.70845	0.000208535	0.00832927
ENSDARG00000040284	si:dkey-79d12.5	208.569	2.29544	0.607305	3.77972	0.000157002	0.0068531
ENSDARG00000008732	zgc:66479	763.537	2.29522	0.548465	4.1848	2.8542e-05	0.0020875
ENSDARG00000116617	spaca4l	339.19	2.2951	0.503193	4.56107	5.08943e-06	0.000650447
ENSDARG00000096932	si:ch211-37e10.2	287.111	2.29394	0.607039	3.7789	0.00015752	0.00685754
ENSDARG00000102712	CR376766.3	633.16	2.29387	0.732527	3.13146	0.00173942	0.0337193
ENSDARG00000016470	anxa5b	140.333	2.29234	0.739517	3.09978	0.00193665	0.0356882
ENSDARG00000008433	unc45b	1769.59	2.29196	0.681589	3.36268	0.000771909	0.0204209
ENSDARG00000095675	ccdc141	174.817	2.28314	0.659291	3.46303	0.000534126	0.0160293
ENSDARG00000042172	c7a	199.823	2.28081	0.481826	4.73367	2.20492e-06	0.000355727
ENSDARG00000021184	rbfox1l	3113.65	2.27802	0.634333	3.5912	0.000329153	0.011261
ENSDARG00000112015	0	33.5187	2.27509	0.733362	3.10227	0.0019204	0.0354681
ENSDARG00000053829	pax9	198.293	2.2731	0.769767	2.95297	0.00314729	0.0491963
ENSDARG00000045958	egfl6	625.348	2.27281	0.566667	4.01084	6.05021e-05	0.00349575
ENSDARG00000093219	BX936308.2	59.0271	2.27138	0.603881	3.76131	0.000169029	0.00718519
ENSDARG00000101423	cyp2y3	99.5742	2.26725	0.589669	3.84495	0.000120576	0.00564329
ENSDARG00000034080	plcd1b	148.647	2.26408	0.52827	4.28584	1.82049e-05	0.00155222
ENSDARG00000101980	bmper	146.064	2.26236	0.48898	4.6267	3.71534e-06	0.000527066
ENSDARG00000110186	CDCP1	83.3772	2.25971	0.609735	3.70606	0.00021051	0.0083675
ENSDARG00000058365	hspb8	1174.22	2.25884	0.719395	3.13992	0.00168993	0.0329132
ENSDARG00000042552	cacna1sb	735.413	2.25801	0.762421	2.96163	0.00306019	0.0486251
ENSDARG00000052000	cav2	35.303	2.25725	0.755669	2.98709	0.00281645	0.0462089
ENSDARG00000020594	txlnba	1061.77	2.25682	0.707732	3.18881	0.00142861	0.0302565
ENSDARG00000007823	atf3	960.091	2.25597	0.743786	3.03309	0.00242066	0.0413602
ENSDARG00000030494	hjv	179.063	2.24811	0.659753	3.4075	0.000655597	0.0183791
ENSDARG00000102106	tgm1l1	423.791	2.24704	0.602158	3.73164	0.000190234	0.00778728
ENSDARG00000076996	0	81.0304	2.24555	0.746151	3.00952	0.00261665	0.0438488
ENSDARG00000091699	capn2a	552.726	2.24547	0.524564	4.28063	1.86361e-05	0.00158081
ENSDARG00000076312	myot	569.257	2.24537	0.698093	3.21644	0.00129791	0.0284021
ENSDARG00000007709	adamts8a	43.6294	2.23962	0.723462	3.0957	0.00196347	0.0358214
ENSDARG00000017624	krt4	23507	2.23765	0.555499	4.02818	5.62096e-05	0.00332729
ENSDARG00000098465	si:ch73-366l1.5	278.827	2.23102	0.541551	4.11969	3.79383e-05	0.00252758
ENSDARG00000033466	tagln2	192.349	2.23034	0.613946	3.6328	0.000280363	0.0101177
ENSDARG00000004724	tcea3	89.7655	2.23006	0.680959	3.27489	0.00105703	0.0250948
ENSDARG00000041706	vgll2a	60.1196	2.22955	0.681605	3.27102	0.00107159	0.0253363
ENSDARG00000088091	pfn1	1698.34	2.22852	0.562455	3.96213	7.42825e-05	0.00390188
ENSDARG00000028664	ahsa1a	144.04	2.22641	0.669253	3.32671	0.00087878	0.0224902
ENSDARG00000037961	rcn3	568.595	2.22331	0.647736	3.43243	0.000598191	0.0172707
ENSDARG00000056922	ltbp1	262.485	2.2226	0.624521	3.55889	0.000372422	0.0124564
ENSDARG00000055715	capn8	121.743	2.22151	0.656175	3.38555	0.000710367	0.019354
ENSDARG00000075930	adamts2	41.5064	2.22113	0.704657	3.15207	0.00162119	0.0321813
ENSDARG00000039669	GFUS	244.153	2.22025	0.753589	2.94623	0.0032167	0.04975
ENSDARG00000043342	gpx3	40.3412	2.21801	0.744803	2.97799	0.00290146	0.0470478
ENSDARG00000040606	tfap2c	693.064	2.21654	0.531797	4.16801	3.07267e-05	0.00220803
ENSDARG00000099291	lsr	101.698	2.21613	0.508794	4.35566	1.32669e-05	0.00121401
ENSDARG00000071113	xirp2a	1893.66	2.21509	0.718757	3.08183	0.00205734	0.0371223
ENSDARG00000078309	fam83b	45.7762	2.21347	0.735596	3.00908	0.00262036	0.043856
ENSDARG00000058108	eps8l2	43.9953	2.21046	0.741779	2.97994	0.00288305	0.0468346
ENSDARG00000076945	dsg2.1	212.227	2.21031	0.496916	4.44805	8.66532e-06	0.000932003
ENSDARG00000079198	usp13	790.94	2.21001	0.690042	3.20272	0.00136137	0.0291702
ENSDARG00000074094	tgm2b	314.591	2.20916	0.444702	4.96772	6.77439e-07	0.000134312
ENSDARG00000096891	CR774184.1	96.9221	2.20743	0.738415	2.98942	0.00279508	0.0459041
ENSDARG00000071562	mtus1a	50.6011	2.2055	0.658095	3.35133	0.000804237	0.0210406
ENSDARG00000102626	frem2b	804.066	2.20114	0.423207	5.20108	1.98132e-07	5.12493e-05
ENSDARG00000052881	dnajb5	51.2286	2.19934	0.691486	3.18059	0.00146973	0.0307709
ENSDARG00000074341	hykk.2	30.8488	2.19731	0.741564	2.96308	0.00304578	0.0485672
ENSDARG00000002411	pde4cb	50.9247	2.19582	0.668089	3.28671	0.00101364	0.0246221
ENSDARG00000035694	stm	213.125	2.19567	0.742517	2.95707	0.00310582	0.0490215
ENSDARG00000046079	cacng6b	94.2174	2.19279	0.695856	3.15121	0.00162595	0.0322032
ENSDARG00000012796	hnmt	51.6723	2.19159	0.602679	3.63642	0.000276454	0.0100649
ENSDARG00000038694	zgc:101744	64.6598	2.17888	0.622773	3.49867	0.000467593	0.0145458
ENSDARG00000103454	trpm6	132.937	2.17591	0.50405	4.31686	1.58263e-05	0.0014002
ENSDARG00000077301	mlf1	273.316	2.17388	0.670625	3.24158	0.00118871	0.0269441
ENSDARG00000006757	klhl41b	1380.62	2.1735	0.667053	3.25836	0.00112059	0.0259359
ENSDARG00000006546	ak4	104.282	2.17337	0.626275	3.47031	0.000519855	0.0157546
ENSDARG00000027611	cavin2a	154.997	2.16947	0.5333	4.06801	4.74154e-05	0.00291805
ENSDARG00000045129	fkbp10b	443.157	2.16917	0.471225	4.60326	4.1593e-06	0.000573791
ENSDARG00000103750	si:ch211-246m6.5	356.931	2.16438	0.556077	3.89223	9.93278e-05	0.00483635
ENSDARG00000060626	dgkaa	98.6886	2.15608	0.526449	4.0955	4.2125e-05	0.00271218
ENSDARG00000034210	si:dkey-240h12.4	86.5414	2.15576	0.580161	3.71579	0.00020257	0.00815033
ENSDARG00000078768	abhd15a	30.4297	2.15335	0.722568	2.98013	0.00288127	0.0468346
ENSDARG00000103747	cav1	456.409	2.1517	0.536389	4.01146	6.03433e-05	0.00349575
ENSDARG00000069833	rhbdl2	88.5859	2.14865	0.65724	3.26921	0.00107849	0.025389
ENSDARG00000100088	zmp:0000001114	234.832	2.14802	0.549409	3.90969	9.24148e-05	0.00460842
ENSDARG00000058943	cdcp1a	31.766	2.14444	0.692153	3.09822	0.00194687	0.0357563
ENSDARG00000040045	cldn1	95.5748	2.13998	0.549736	3.89275	9.91157e-05	0.00483635
ENSDARG00000058548	bves	136.826	2.13515	0.687323	3.10648	0.0018933	0.0351614
ENSDARG00000061758	sh3pxd2ab	189.174	2.13218	0.688691	3.096	0.00196153	0.0358214
ENSDARG00000075752	myo18aa	421.553	2.13209	0.567556	3.75662	0.000172222	0.0072669
ENSDARG00000019949	serpinh1b	2007.45	2.13165	0.623087	3.42111	0.000623662	0.0176948
ENSDARG00000078318	tmod1	54.4887	2.13001	0.614092	3.46855	0.000523278	0.0157809
ENSDARG00000054060	pof1b	176.607	2.12977	0.585399	3.63815	0.000274607	0.0100421
ENSDARG00000008548	arhgap12a	69.5427	2.12921	0.582264	3.65678	0.000255406	0.00959581
ENSDARG00000016691	cd9b	132.125	2.12505	0.572466	3.71209	0.000205555	0.00825027
ENSDARG00000117530	CABZ01085662.1	55.7822	2.12357	0.614671	3.45481	0.000550671	0.0163867
ENSDARG00000003193	rassf7b	47.5716	2.12012	0.601423	3.52517	0.000423213	0.0134708
ENSDARG00000019753	kcnn3	173.736	2.11975	0.624597	3.39378	0.00068935	0.0190582
ENSDARG00000005216	zgc:158328	430.165	2.11806	0.558214	3.79435	0.000148032	0.0065661
ENSDARG00000092947	cyt1	3928.21	2.11637	0.588728	3.59482	0.000324618	0.0112077
ENSDARG00000099672	capgb	88.3794	2.11185	0.703764	3.0008	0.00269276	0.0447144
ENSDARG00000036371	acta1a	3806.52	2.11121	0.67643	3.12111	0.0018017	0.0344353
ENSDARG00000038826	jph1b	819.514	2.11104	0.676603	3.12006	0.00180816	0.0344786
ENSDARG00000054723	si:ch211-242b18.1	1421.37	2.11071	0.484741	4.3543	1.33494e-05	0.00121401
ENSDARG00000010085	p4ha2	147.895	2.11064	0.573998	3.67708	0.00023592	0.00915635
ENSDARG00000029764	mef2ca	1697.54	2.10886	0.635624	3.31778	0.000907367	0.0229717
ENSDARG00000002172	aplnra	115.444	2.10795	0.5713	3.68974	0.000224479	0.00881629
ENSDARG00000040009	palld	809.585	2.10664	0.550752	3.82503	0.000130758	0.00595832
ENSDARG00000114086	DOCK9	180.644	2.10615	0.528058	3.98848	6.64993e-05	0.00368455
ENSDARG00000070000	txnipb	60.0729	2.10526	0.649132	3.2432	0.00118197	0.0268422
ENSDARG00000099889	dusp27	253.197	2.10461	0.612486	3.43618	0.000589973	0.017153
ENSDARG00000014626	dlx3b	68.5336	2.0932	0.652836	3.20632	0.00134442	0.0289579
ENSDARG00000061798	arhgap27l	87.3403	2.0881	0.610914	3.41799	0.000630844	0.0178371
ENSDARG00000031658	si:ch211-207d6.2	101.191	2.0879	0.490969	4.25261	2.11289e-05	0.00172983
ENSDARG00000060236	dok7	89.0754	2.08522	0.704175	2.96122	0.00306418	0.0486251
ENSDARG00000016233	sdr16c5a	84.2585	2.08363	0.607122	3.43199	0.000599175	0.0172707
ENSDARG00000007219	actn1	718.378	2.0822	0.51989	4.00507	6.19982e-05	0.00355485
ENSDARG00000086183	vkorc1	76.6444	2.07956	0.694649	2.99369	0.00275627	0.0457229
ENSDARG00000020072	thbs4b	590.936	2.07888	0.660925	3.14541	0.00165852	0.0326434
ENSDARG00000091127	klf15	146.503	2.07833	0.552192	3.76378	0.000167367	0.00715376
ENSDARG00000071478	lnx2b	38.0537	2.07123	0.644652	3.21295	0.0013138	0.0285977
ENSDARG00000060871	mctp1b	65.4506	2.07088	0.569143	3.63858	0.000274141	0.0100421
ENSDARG00000109267	CABZ01024501.1	48.7912	2.07027	0.602577	3.43569	0.000591042	0.0171538
ENSDARG00000094752	rpe65b	229.026	2.06986	0.549415	3.76739	0.000164962	0.00708779
ENSDARG00000023062	ccn1	839.459	2.0696	0.582393	3.55361	0.000379979	0.0125814
ENSDARG00000032242	tnnt2c	1648.1	2.06495	0.690409	2.9909	0.00278155	0.0458136
ENSDARG00000114484	CT027583.2	43.3091	2.0566	0.648363	3.17199	0.00151398	0.031174
ENSDARG00000043211	ripk4	70.6889	2.05647	0.53393	3.85156	0.000117366	0.00554994
ENSDARG00000055592	capn2b	124.141	2.05495	0.616343	3.3341	0.000855759	0.0220381
ENSDARG00000059993	trpm4a	119.82	2.05306	0.62297	3.2956	0.000982121	0.0241621
ENSDARG00000020929	fam49ba	84.1412	2.05129	0.590158	3.47583	0.000509271	0.0154909
ENSDARG00000045946	sec24d	621.657	2.05017	0.602463	3.40298	0.000666545	0.0185282
ENSDARG00000003216	anxa2a	158.818	2.0491	0.625011	3.27851	0.00104358	0.0250274
ENSDARG00000016311	dock9b	314.196	2.04594	0.545817	3.74839	0.000177973	0.00743918
ENSDARG00000059259	pabpc4	1598.47	2.04413	0.65738	3.10951	0.00187395	0.0349335
ENSDARG00000043035	capn3b	123.708	2.04244	0.687852	2.9693	0.00298476	0.0479808
ENSDARG00000043066	nog2	115.362	2.03977	0.603228	3.38142	0.000721111	0.0195496
ENSDARG00000060980	atp8b1	168.649	2.03854	0.486723	4.1883	2.81055e-05	0.00207401
ENSDARG00000018881	apobec2a	236.507	2.03549	0.662236	3.07366	0.00211449	0.0376988
ENSDARG00000103991	sec14l1	41.1226	2.03323	0.624559	3.25547	0.00113205	0.0261278
ENSDARG00000004695	six4a	142.469	2.03145	0.490728	4.13966	3.47823e-05	0.00235546
ENSDARG00000074575	ppp1r9alb	81.9972	2.02791	0.591056	3.431	0.000601369	0.0172707
ENSDARG00000035562	mpdu1a	81.6085	2.02699	0.51868	3.90798	9.30709e-05	0.00462712
ENSDARG00000098641	nbeal2	175.853	2.02639	0.532943	3.80226	0.000143381	0.00641162
ENSDARG00000016343	zgc:92518	214.304	2.02546	0.684395	2.95949	0.00308153	0.0488062
ENSDARG00000091511	gpx7	110.348	2.02233	0.676223	2.99063	0.002784	0.0458136
ENSDARG00000052341	sgcb	190.752	2.02095	0.56622	3.5692	0.000358076	0.0120501
ENSDARG00000103720	0	333.421	2.01882	0.547277	3.68885	0.000225273	0.0088264
ENSDARG00000020239	lpin1	75.7762	2.01507	0.523417	3.84985	0.000118192	0.00557295
ENSDARG00000079895	ehbp1l1b	507.486	2.01354	0.681828	2.95315	0.0031455	0.0491963
ENSDARG00000013414	lin7a	66.5894	2.01271	0.645233	3.11936	0.00181246	0.0344983
ENSDARG00000014259	eya1	902.526	2.01049	0.460743	4.36358	1.27953e-05	0.0012032
ENSDARG00000099005	palm2akap2	165.888	2.01021	0.448652	4.48056	7.4448e-06	0.000850775
ENSDARG00000091902	b3gnt2b	234.15	2.00988	0.499306	4.02536	5.68889e-05	0.00334344
ENSDARG00000100697	FQ323156.1	119.554	2.00479	0.554428	3.61595	0.000299244	0.010509
ENSDARG00000102415	scinla	349.046	2.00415	0.641942	3.12201	0.00179619	0.0343698
ENSDARG00000019342	chrnd	250.763	2.00222	0.655701	3.05355	0.00226148	0.0393391
ENSDARG00000006060	crybg1b	158.901	2.00025	0.606602	3.29747	0.000975616	0.0241062
ENSDARG00000014804	cacna2d1a	596.997	1.99827	0.642716	3.1091	0.00187659	0.0349335
ENSDARG00000026473	six1b	253.526	1.99693	0.532771	3.74819	0.000178114	0.00743918
ENSDARG00000097153	CR954963.1	236.438	1.99575	0.443773	4.49722	6.88469e-06	0.000797849
ENSDARG00000036168	nfatc1	148.646	1.99406	0.622991	3.20078	0.00137055	0.0293287
ENSDARG00000088590	pxna	286.462	1.99052	0.478231	4.16225	3.15126e-05	0.00223522
ENSDARG00000062059	si:ch211-236l14.4	57.4091	1.98999	0.586835	3.39106	0.000696241	0.0191915
ENSDARG00000088202	sh3d19	44.8698	1.98859	0.654309	3.03923	0.00237188	0.0406465
ENSDARG00000007077	ankrd50l	207.368	1.98429	0.524708	3.78171	0.000155756	0.00681679
ENSDARG00000022309	dspa	747.345	1.98293	0.480161	4.12972	3.63205e-05	0.00243955
ENSDARG00000104949	slc27a1b	57.9802	1.97586	0.636106	3.10618	0.00189524	0.0351614
ENSDARG00000007682	ppdpfa	164.551	1.9738	0.599003	3.29513	0.000983753	0.0241621
ENSDARG00000098420	SNTA1	229.771	1.97179	0.473263	4.16638	3.09479e-05	0.00221425
ENSDARG00000020656	prkg1a	165.162	1.97145	0.54209	3.63677	0.000276081	0.0100649
ENSDARG00000098954	stard13b	345.579	1.97025	0.542445	3.63217	0.000281048	0.0101202
ENSDARG00000036558	col18a1a	2757.08	1.96841	0.457403	4.30345	1.68155e-05	0.00145685
ENSDARG00000096887	CR381618.1	807.948	1.96466	0.513423	3.82659	0.000129932	0.00595589
ENSDARG00000052148	ptgs1	51.7726	1.96457	0.620092	3.16819	0.0015339	0.0313619
ENSDARG00000040695	fkbp14	237.809	1.96436	0.541056	3.6306	0.000282766	0.0101598
ENSDARG00000025299	tspan9a	67.5598	1.96368	0.569161	3.45014	0.000560299	0.0164469
ENSDARG00000008487	dmd	1834.14	1.96312	0.579537	3.3874	0.000705596	0.0192878
ENSDARG00000019442	CABZ01086041.1	103.827	1.96048	0.484244	4.04854	5.15371e-05	0.0031295
ENSDARG00000077641	thbs3a	151.791	1.95885	0.472379	4.14678	3.3718e-05	0.00232347
ENSDARG00000036422	ntn5	51.2431	1.95818	0.643582	3.04262	0.00234525	0.0403276
ENSDARG00000024030	angptl2a	304.034	1.95283	0.506718	3.85389	0.000116257	0.00551334
ENSDARG00000012790	tmem161a	1109.2	1.95074	0.59407	3.28369	0.00102456	0.024758
ENSDARG00000078037	chpfb	74.3648	1.94883	0.562212	3.46636	0.000527553	0.0158709
ENSDARG00000021987	plecb	4727.6	1.94632	0.612169	3.17939	0.00147586	0.0308206
ENSDARG00000057633	cxcr4a	83.0516	1.94553	0.582304	3.34109	0.000834495	0.0217272
ENSDARG00000013335	anxa6	336.957	1.9399	0.623892	3.10935	0.00187502	0.0349335
ENSDARG00000010515	dvl1a	74.6123	1.93719	0.58944	3.28649	0.00101445	0.0246221
ENSDARG00000043646	slc6a8	829.848	1.93463	0.644106	3.0036	0.00266809	0.0444393
ENSDARG00000070961	lepr	246.591	1.93277	0.480019	4.02644	5.66275e-05	0.00334001
ENSDARG00000042725	cebpb	162.23	1.9296	0.634366	3.04178	0.00235186	0.0403569
ENSDARG00000043182	hhla2a.1	161.096	1.92779	0.611777	3.15113	0.00162641	0.0322032
ENSDARG00000088232	shisa2b	57.4364	1.92686	0.621212	3.10177	0.00192366	0.0354885
ENSDARG00000037455	ugt8	104.079	1.92006	0.593969	3.2326	0.00122668	0.0275018
ENSDARG00000014358	optc	161.355	1.91918	0.497293	3.85924	0.000113739	0.00540952
ENSDARG00000018971	b3gnt5a	163.242	1.91909	0.479872	3.99917	6.35655e-05	0.00359462
ENSDARG00000009026	ank2a	713.369	1.91803	0.52152	3.67778	0.000235276	0.00915298
ENSDARG00000100518	CR387919.1	107.538	1.91551	0.521663	3.67193	0.00024073	0.00923416
ENSDARG00000036832	cyt1l	2547.63	1.91432	0.64541	2.96606	0.00301647	0.0482557
ENSDARG00000073822	IQSEC1	145.445	1.9131	0.633315	3.02077	0.0025213	0.0425981
ENSDARG00000043818	CASKIN2	62.7379	1.90568	0.581397	3.27776	0.00104636	0.0250274
ENSDARG00000079745	si:ch211-166a6.5	519.23	1.90141	0.495978	3.83366	0.00012625	0.00581985
ENSDARG00000010059	itpkb	122.384	1.90138	0.620425	3.06464	0.00217935	0.0383171
ENSDARG00000056499	ca6	273.831	1.89698	0.482972	3.92772	8.57567e-05	0.00431563
ENSDARG00000031809	rbm24b	157.368	1.89476	0.621819	3.04712	0.00231047	0.0399802
ENSDARG00000024546	pla2g4aa	99.7966	1.89474	0.521351	3.63428	0.000278757	0.0101152
ENSDARG00000041546	gypc	109.378	1.89393	0.610314	3.1032	0.00191442	0.0354681
ENSDARG00000006314	itgav	1057.62	1.89163	0.506387	3.73554	0.000187315	0.00768692
ENSDARG00000101452	SUSD2	80.5868	1.88845	0.598738	3.15405	0.00161023	0.0320762
ENSDARG00000101592	col22a1	592.207	1.8829	0.596641	3.15584	0.00160037	0.0319927
ENSDARG00000007009	hoxa11b	151.752	1.88108	0.565604	3.32579	0.000881678	0.0225011
ENSDARG00000057671	epas1b	151.718	1.87948	0.617189	3.04523	0.00232504	0.0401535
ENSDARG00000075707	nid2a	1545.18	1.87527	0.597239	3.1399	0.00169006	0.0329132
ENSDARG00000005749	cand2	192.722	1.87218	0.561399	3.33484	0.000853471	0.0220137
ENSDARG00000038585	eif4e2	122.854	1.86323	0.598097	3.11527	0.00183779	0.0347482
ENSDARG00000027088	ptgdsb.1	170.052	1.86065	0.535452	3.47491	0.000511026	0.0155156
ENSDARG00000041502	tgfb1a	211.126	1.85567	0.566686	3.27459	0.00105814	0.0250948
ENSDARG00000098573	sgcd	558.44	1.85366	0.615146	3.01337	0.00258366	0.0434287
ENSDARG00000007398	lrrk1	64.5461	1.85359	0.544452	3.40451	0.000662839	0.018485
ENSDARG00000071014	s100u	144.804	1.85293	0.627205	2.95427	0.00313412	0.0491963
ENSDARG00000039652	si:dkey-235d18.5	166.444	1.85061	0.548365	3.37477	0.000738765	0.0199297
ENSDARG00000005762	col14a1a	861.153	1.85044	0.422554	4.37918	1.19128e-05	0.00116572
ENSDARG00000020107	usp2a	514.663	1.84742	0.585451	3.15555	0.00160197	0.0319927
ENSDARG00000052997	sema4e	88.7711	1.84579	0.580715	3.17847	0.00148052	0.0308206
ENSDARG00000031983	six4b	148.991	1.84248	0.559853	3.29101	0.000998271	0.0243732
ENSDARG00000099437	si:ch1073-268j14.1	145.152	1.84233	0.498771	3.69374	0.000220976	0.00872033
ENSDARG00000104267	postnb	4650.89	1.84231	0.44352	4.15385	3.26934e-05	0.00228329
ENSDARG00000076321	col28a2a	2003.85	1.84177	0.520329	3.53964	0.000400677	0.0130594
ENSDARG00000040046	snai2	495.861	1.8406	0.533068	3.45283	0.000554728	0.0164469
ENSDARG00000086881	ier2b	283.798	1.83984	0.597135	3.0811	0.00206234	0.0371718
ENSDARG00000074148	rbpjl	152.185	1.83897	0.517677	3.55235	0.000381809	0.0126166
ENSDARG00000036987	has2	125.923	1.83487	0.580693	3.15979	0.00157881	0.0318003
ENSDARG00000053104	fam102ba	62.044	1.82868	0.590685	3.09587	0.00196239	0.0358214
ENSDARG00000015552	phactr4a	251.232	1.8257	0.435027	4.19675	2.70772e-05	0.00201621
ENSDARG00000100577	CU694481.1	63.2217	1.82406	0.543975	3.3532	0.00079882	0.0209833
ENSDARG00000091161	rpz	87.396	1.81926	0.584839	3.1107	0.00186643	0.0349335
ENSDARG00000025348	igfbp5b	621.007	1.81839	0.430653	4.22241	2.41707e-05	0.00185001
ENSDARG00000077897	znf296	143.453	1.81753	0.564548	3.21944	0.00128441	0.028222
ENSDARG00000098024	si:dkey-262k9.2	157.043	1.81556	0.60834	2.98445	0.00284092	0.0464252
ENSDARG00000015947	matn4	3524.98	1.81505	0.490189	3.70275	0.000213275	0.008457
ENSDARG00000103854	pdlim7	304.488	1.81006	0.478208	3.78508	0.000153657	0.00674287
ENSDARG00000076781	trim45	141.208	1.80982	0.468345	3.86429	0.000111413	0.00531422
ENSDARG00000063563	creb3l2	505.085	1.80959	0.536884	3.37054	0.000750212	0.0200774
ENSDARG00000059746	plod1a	455.955	1.80897	0.569226	3.17795	0.00148321	0.0308206
ENSDARG00000059029	mmp28	72.3181	1.80694	0.572955	3.15373	0.00161199	0.0320762
ENSDARG00000037655	pls3	858.667	1.80613	0.478671	3.77322	0.000161154	0.00697419
ENSDARG00000028816	tmed3	108.286	1.80145	0.57918	3.11034	0.00186875	0.0349335
ENSDARG00000069476	spint2	180.06	1.79956	0.553784	3.24957	0.0011558	0.02649
ENSDARG00000016260	fxr2	3115.9	1.79944	0.524369	3.43164	0.000599954	0.0172707
ENSDARG00000005476	nav3	589.963	1.79935	0.406815	4.42302	9.73303e-06	0.00102017
ENSDARG00000040237	mef2d	797.51	1.79573	0.387142	4.63843	3.51071e-06	0.000506901
ENSDARG00000061242	tuft1a	69.9177	1.79323	0.601264	2.98244	0.00285961	0.0466843
ENSDARG00000040432	klf2b	140.604	1.79301	0.533565	3.36044	0.00077818	0.020522
ENSDARG00000078404	cdh26.1	168.564	1.79131	0.555781	3.22305	0.00126834	0.0279782
ENSDARG00000008697	epas1a	244.046	1.78991	0.460519	3.88672	0.000101609	0.00491911
ENSDARG00000042409	RALGDS	153.398	1.78818	0.500453	3.57313	0.000352737	0.0119192
ENSDARG00000004930	lmo7a	136.956	1.78556	0.605416	2.94932	0.00318474	0.0494663
ENSDARG00000041505	itm2bb	137.752	1.78478	0.550833	3.24014	0.0011947	0.0270055
ENSDARG00000030967	si:ch211-51a6.2	182.855	1.78409	0.546774	3.26295	0.00110261	0.025664
ENSDARG00000078114	si:ch73-237c6.1	129.069	1.78268	0.486945	3.66094	0.000251288	0.00946269
ENSDARG00000115956	CABZ01044281.1	196.961	1.77871	0.562402	3.1627	0.00156315	0.0316399
ENSDARG00000039943	tent5ba	660.036	1.77804	0.535052	3.32312	0.000890152	0.0226055
ENSDARG00000026736	il11ra	114.001	1.77629	0.490712	3.61982	0.000294804	0.0104214
ENSDARG00000062263	arhgap17b	103.208	1.77293	0.55976	3.16731	0.00153856	0.0313619
ENSDARG00000102867	srfb	173.367	1.76998	0.519877	3.40462	0.000662568	0.018485
ENSDARG00000055100	cxcl12b	845.613	1.76927	0.42561	4.15702	3.22424e-05	0.00226744
ENSDARG00000017676	mmp2	702.616	1.76875	0.541346	3.26732	0.00108572	0.025451
ENSDARG00000062518	ulk1a	70.4465	1.76688	0.537722	3.28586	0.00101673	0.024641
ENSDARG00000097168	CR749752.1	428.795	1.7629	0.591986	2.97794	0.00290189	0.0470478
ENSDARG00000062430	gpd2	181.125	1.75897	0.497657	3.53451	0.000408528	0.0132077
ENSDARG00000005690	slc25a23a	200.544	1.7582	0.467514	3.76074	0.000169413	0.00718519
ENSDARG00000090585	gpc1b	129.011	1.75303	0.513094	3.41659	0.000634116	0.0178988
ENSDARG00000074808	megf6b	259.403	1.75131	0.536862	3.26213	0.00110577	0.0257013
ENSDARG00000098766	pcxa	833.515	1.74872	0.434978	4.02025	5.81364e-05	0.0034046
ENSDARG00000055759	efhd2	393.169	1.74861	0.485974	3.59815	0.000320491	0.0111266
ENSDARG00000042934	ccn2a	662.656	1.74377	0.442612	3.93974	8.157e-05	0.00416868
ENSDARG00000026611	socs3b	233.109	1.73952	0.552086	3.15081	0.00162816	0.0322032
ENSDARG00000036074	cebpa	83.008	1.73904	0.547336	3.17727	0.00148666	0.0308206
ENSDARG00000098191	si:dkey-16l2.20	82.875	1.73516	0.565102	3.07052	0.00213684	0.037899
ENSDARG00000115657	prkcaa	170.665	1.73488	0.498935	3.47716	0.000506748	0.0154427
ENSDARG00000026165	col11a1a	5727.46	1.73416	0.512528	3.38354	0.000715572	0.0194314
ENSDARG00000004034	arhgdig	261.606	1.73349	0.530198	3.26952	0.00107731	0.025389
ENSDARG00000051729	nfatc3b	87.5747	1.73195	0.562528	3.07886	0.00207792	0.0372892
ENSDARG00000075909	slc35f3a	93.9981	1.73055	0.574128	3.01422	0.00257643	0.0433959
ENSDARG00000007671	ghrb	107.698	1.73017	0.518261	3.33841	0.000842605	0.0218361
ENSDARG00000076870	piezo1	509.132	1.72833	0.439405	3.93334	8.37743e-05	0.00424181
ENSDARG00000013921	frya	202.936	1.72786	0.527341	3.27654	0.00105086	0.025065
ENSDARG00000019845	pdlim1	199.898	1.7211	0.498809	3.45041	0.000559742	0.0164469
ENSDARG00000005023	fkbp9	1273.14	1.72052	0.582942	2.95144	0.00316292	0.0493063
ENSDARG00000059202	tspan2b	66.6755	1.7205	0.561407	3.06462	0.00217944	0.0383171
ENSDARG00000044011	xkrx	131.516	1.71984	0.525113	3.27518	0.00105596	0.0250948
ENSDARG00000098639	pycr1b	322.034	1.71629	0.519173	3.30581	0.000947024	0.0235411
ENSDARG00000094998	FP015823.1	65.5735	1.71479	0.550832	3.11309	0.00185139	0.0348587
ENSDARG00000071082	p4ha1b	126.212	1.70791	0.539078	3.1682	0.00153385	0.0313619
ENSDARG00000044155	mafaa	230.59	1.70702	0.522435	3.26743	0.00108529	0.025451
ENSDARG00000015506	pibf1	64.3097	1.69638	0.559342	3.03281	0.0024229	0.0413602
ENSDARG00000062590	pleca	4216.77	1.69449	0.424333	3.9933	6.5159e-05	0.00363477
ENSDARG00000044588	emp2	1544.04	1.69397	0.413681	4.09488	4.22391e-05	0.00271218
ENSDARG00000043531	jun	1958.38	1.69174	0.550204	3.07476	0.00210673	0.0376988
ENSDARG00000073859	kif13bb	89.1688	1.69096	0.513952	3.29011	0.00100147	0.0244152
ENSDARG00000045676	calua	492.161	1.68802	0.518644	3.25468	0.0011352	0.0261636
ENSDARG00000101199	rbp4	98.379	1.68312	0.569976	2.95296	0.00314744	0.0491963
ENSDARG00000074201	flna	4492.74	1.68253	0.448797	3.74897	0.00017756	0.00743918
ENSDARG00000031782	crybg1a	534.91	1.68225	0.475839	3.53534	0.000407254	0.0131925
ENSDARG00000019392	stat5a	172.199	1.68069	0.521063	3.22551	0.00125749	0.0278657
ENSDARG00000053091	DAB2	702.686	1.67852	0.561466	2.98953	0.00279408	0.0459041
ENSDARG00000030465	tmem263	361.935	1.67823	0.548012	3.0624	0.00219569	0.0385617
ENSDARG00000044808	slc4a4b	259.053	1.67712	0.542207	3.09314	0.0019805	0.0360622
ENSDARG00000087196	fibinb	149.856	1.673	0.552095	3.03029	0.00244323	0.041664
ENSDARG00000011407	col2a1b	3920.42	1.6701	0.510774	3.26974	0.00107647	0.025389
ENSDARG00000062517	si:ch211-107n13.1	312.035	1.66997	0.566252	2.94917	0.00318633	0.0494663
ENSDARG00000045929	oaz2a	164.25	1.6698	0.469403	3.55728	0.000374716	0.0124824
ENSDARG00000076673	dspb	719.561	1.66871	0.471408	3.53985	0.000400362	0.0130594
ENSDARG00000020759	elf1	276.972	1.66517	0.467445	3.56228	0.00036765	0.0123219
ENSDARG00000002084	lamb2	1248.77	1.66409	0.513798	3.23881	0.0012003	0.0270207
ENSDARG00000026348	csad	145.787	1.66387	0.518888	3.20661	0.00134309	0.0289579
ENSDARG00000061579	myo1cb	549.539	1.66265	0.444037	3.7444	0.000180829	0.00753347
ENSDARG00000032856	ccdc120	93.5895	1.65516	0.502273	3.29534	0.000983014	0.0241621
ENSDARG00000039677	dsc2l	179.153	1.65218	0.45332	3.64462	0.000267787	0.00988439
ENSDARG00000097877	si:ch211-167b20.8	192.622	1.64429	0.551578	2.98107	0.00287241	0.0467541
ENSDARG00000101175	mcu	151.826	1.64403	0.51262	3.20711	0.00134076	0.0289549
ENSDARG00000017901	tln2a	1719.42	1.64311	0.517196	3.17696	0.00148825	0.0308206
ENSDARG00000097617	si:ch211-178n15.1	103.269	1.64043	0.55699	2.94517	0.00322775	0.0498299
ENSDARG00000095947	adkb	208.316	1.64024	0.539146	3.04229	0.00234784	0.0403299
ENSDARG00000100940	nr5a2	68.6054	1.63623	0.536298	3.05098	0.00228096	0.0395527
ENSDARG00000002445	prdm1a	189.511	1.63403	0.483597	3.3789	0.000727761	0.0196974
ENSDARG00000061764	ahnak	8532	1.63341	0.432953	3.77273	0.000161471	0.00697419
ENSDARG00000089413	mbpb	107.075	1.63327	0.520998	3.13489	0.00171919	0.0334014
ENSDARG00000058358	krt8	2900.77	1.63063	0.486454	3.35207	0.000802085	0.0210177
ENSDARG00000040526	s1pr5a	82.9128	1.62806	0.5454	2.98507	0.00283515	0.0463978
ENSDARG00000009194	col16a1	790.424	1.62348	0.514062	3.15815	0.00158773	0.0319057
ENSDARG00000046019	snai1b	360.59	1.62241	0.482536	3.36225	0.000773106	0.0204209
ENSDARG00000110040	CABZ01092781.1	576.071	1.61996	0.547848	2.95694	0.00310704	0.0490215
ENSDARG00000076962	gdpd5b	95.7424	1.6184	0.484453	3.34067	0.000835762	0.0217272
ENSDARG00000067729	arid3c	723.926	1.61526	0.497694	3.24549	0.00117248	0.0267235
ENSDARG00000020007	col1a2	14611.2	1.61507	0.51142	3.15801	0.00158849	0.0319057
ENSDARG00000055075	svila	744.716	1.61242	0.517705	3.11456	0.00184217	0.0347482
ENSDARG00000004877	rock2b	220.673	1.61184	0.517237	3.11625	0.00183165	0.0347482
ENSDARG00000076332	si:ch211-159i8.4	353.744	1.61125	0.401739	4.01069	6.05425e-05	0.00349575
ENSDARG00000069463	alox12	268.924	1.61111	0.438463	3.67444	0.00023837	0.00919818
ENSDARG00000077722	ppp2r3a	703.534	1.61106	0.515103	3.12765	0.00176211	0.0338753
ENSDARG00000013777	ppp1r13l	169.177	1.60879	0.528506	3.04403	0.00233435	0.0401821
ENSDARG00000025465	spon2a	150.923	1.60763	0.486232	3.3063	0.000945366	0.0235355
ENSDARG00000100973	arhgap24	184.422	1.60629	0.465489	3.45077	0.000559	0.0164469
ENSDARG00000071196	cavin2b	392.549	1.60258	0.412329	3.88666	0.000101635	0.00491911
ENSDARG00000077465	sorcs2	117.98	1.60054	0.528882	3.02627	0.00247594	0.0420911
ENSDARG00000045064	ablim1b	509.96	1.60053	0.402697	3.97454	7.05159e-05	0.00381714
ENSDARG00000078468	fap	290.983	1.60014	0.458405	3.49067	0.000481815	0.0148577
ENSDARG00000063255	btbd11a	80.2435	1.59987	0.518664	3.0846	0.00203829	0.0368595
ENSDARG00000098941	CU856520.1	111.436	1.59893	0.49755	3.21361	0.00131079	0.0285889
ENSDARG00000103479	ptprfa	367.024	1.59547	0.454962	3.50683	0.000453483	0.0142702
ENSDARG00000090190	bcam	386.518	1.59529	0.439873	3.62671	0.000287061	0.0102693
ENSDARG00000070787	jupa	969.288	1.59264	0.428198	3.7194	0.000199698	0.00807427
ENSDARG00000074843	phldb2b	202.69	1.59107	0.453245	3.51039	0.000447454	0.014133
ENSDARG00000032619	tob1a	376.989	1.58464	0.455406	3.47961	0.000502143	0.0153307
ENSDARG00000098777	CU693379.1	102.283	1.58169	0.518624	3.04978	0.00229011	0.0396696
ENSDARG00000035556	rps6ka3a	245.391	1.57609	0.486596	3.23901	0.00119945	0.0270207
ENSDARG00000077588	pdgfc	129.244	1.5712	0.483092	3.25238	0.00114444	0.0262663
ENSDARG00000024325	cert1a	111.339	1.56885	0.531572	2.95133	0.00316404	0.0493063
ENSDARG00000056530	cpamd8	478.338	1.56139	0.453188	3.44534	0.000570341	0.0166706
ENSDARG00000089691	ism2a	274.025	1.56075	0.490816	3.17991	0.00147318	0.030804
ENSDARG00000103519	adamts1	227.308	1.55989	0.503366	3.09891	0.00194234	0.0357529
ENSDARG00000012066	dcn	820.713	1.55417	0.455909	3.40895	0.000652134	0.0183132
ENSDARG00000045636	rbl2	102.999	1.553	0.490242	3.16782	0.00153587	0.0313619
ENSDARG00000023578	lpp	302.883	1.54989	0.448988	3.45196	0.00055652	0.0164469
ENSDARG00000031796	ache	635.635	1.54756	0.490211	3.15692	0.00159444	0.0319587
ENSDARG00000039987	hivep2a	328.87	1.5419	0.416544	3.70166	0.000214193	0.00847299
ENSDARG00000078227	cspg4	805.446	1.54012	0.492053	3.12999	0.00174811	0.033764
ENSDARG00000054031	mxd4	202.567	1.53999	0.49636	3.10256	0.00191853	0.0354681
ENSDARG00000074275	limch1a	466.408	1.52864	0.508049	3.00885	0.00262241	0.043856
ENSDARG00000060102	kank1a	778.811	1.51653	0.433198	3.50078	0.000463907	0.01448
ENSDARG00000117240	CABZ01083943.1	100.222	1.51642	0.478178	3.17125	0.00151782	0.0311826
ENSDARG00000025513	dip2cb	179.498	1.51338	0.484444	3.12394	0.00178445	0.0342512
ENSDARG00000052063	col4a5	2790.83	1.51273	0.440176	3.43665	0.000588958	0.017153
ENSDARG00000067829	ppargc1a	154.395	1.51218	0.448218	3.37375	0.000741511	0.019971
ENSDARG00000019601	col12a1b	3959.79	1.50876	0.427869	3.52623	0.000421523	0.013443
ENSDARG00000055897	zgc:154093	139.741	1.50326	0.477986	3.14499	0.00166093	0.0326434
ENSDARG00000036279	lamc1	3206.5	1.503	0.386157	3.89221	9.93368e-05	0.00483635
ENSDARG00000073870	gdpd2	143.19	1.50242	0.482407	3.11443	0.00184301	0.0347482
ENSDARG00000095843	col24a1	126.532	1.49685	0.475382	3.14874	0.00163978	0.0323164
ENSDARG00000078145	si:ch211-218g4.2	135.781	1.49632	0.468354	3.19484	0.00139909	0.0297076
ENSDARG00000104225	ndel1b	143.92	1.49619	0.503453	2.97185	0.00296009	0.0477094
ENSDARG00000045580	lum	193.385	1.49073	0.505804	2.94726	0.00320606	0.0496789
ENSDARG00000011170	ndrg2	1103.15	1.48833	0.369362	4.02945	5.59066e-05	0.00332129
ENSDARG00000024026	sdf2	92.0763	1.48691	0.492212	3.02087	0.00252047	0.0425981
ENSDARG00000017105	vaspb	522.668	1.48622	0.444621	3.34266	0.000829789	0.0216403
ENSDARG00000068710	nid1a	907.454	1.48506	0.490626	3.02687	0.00247101	0.0420506
ENSDARG00000061231	tinagl1	193.281	1.48011	0.453811	3.26151	0.0011082	0.0257214
ENSDARG00000071259	fbxo34	306.725	1.47507	0.471381	3.12926	0.00175247	0.0338051
ENSDARG00000079009	abca1b	363.378	1.46327	0.471079	3.10621	0.00189499	0.0351614
ENSDARG00000071150	cica	369.257	1.46265	0.427092	3.42468	0.000615525	0.0175547
ENSDARG00000068177	pak2a	512.692	1.45999	0.420859	3.46906	0.000522281	0.0157809
ENSDARG00000092638	ptprua	287.176	1.45751	0.429087	3.39677	0.000681861	0.0188901
ENSDARG00000021833	ahr2	475.885	1.45407	0.420248	3.46002	0.000540129	0.0161313
ENSDARG00000021948	tnc	7592.49	1.45384	0.443197	3.28034	0.00103684	0.0249447
ENSDARG00000019235	sema3aa	590.695	1.44959	0.385754	3.7578	0.000171412	0.0072513
ENSDARG00000100304	chdh	143.857	1.44591	0.490568	2.94742	0.00320436	0.0496789
ENSDARG00000079840	kcnma1a	260.187	1.44554	0.487379	2.96595	0.00301745	0.0482557
ENSDARG00000102191	CPNE8	148.041	1.44211	0.46555	3.09764	0.00195067	0.0357861
ENSDARG00000058984	rad23ab	119.823	1.44029	0.485075	2.96921	0.00298568	0.0479808
ENSDARG00000077295	akap6	308.807	1.43783	0.427245	3.36535	0.000764456	0.020302
ENSDARG00000019815	fn1a	1546.34	1.43752	0.466779	3.07966	0.00207238	0.0372305
ENSDARG00000053483	zgc:113054	137.824	1.43014	0.481802	2.96832	0.00299431	0.0480257
ENSDARG00000054864	aplp2	1359.67	1.4259	0.454007	3.14071	0.00168538	0.0328999
ENSDARG00000063572	perp	674.785	1.42106	0.417912	3.40038	0.000672918	0.0186738
ENSDARG00000068732	spry4	651.974	1.41911	0.446896	3.17547	0.00149592	0.0308869
ENSDARG00000076748	ntn2	125.283	1.41758	0.479093	2.95889	0.00308752	0.0488071
ENSDARG00000076735	si:dkey-193c22.2	559.926	1.40716	0.440444	3.19486	0.00139897	0.0297076
ENSDARG00000077694	dtnba	633.717	1.39817	0.469617	2.97726	0.00290835	0.0470598
ENSDARG00000006353	itga5	674.397	1.39609	0.444217	3.1428	0.0016734	0.0327827
ENSDARG00000015536	sox6	1195.63	1.396	0.389696	3.58228	0.000340611	0.0115808
ENSDARG00000017058	large2	252.624	1.39346	0.420589	3.31312	0.000922607	0.0231793
ENSDARG00000071353	0	870.07	1.38058	0.468762	2.94516	0.00322792	0.0498299
ENSDARG00000101209	lamb1a	1410.36	1.37822	0.428311	3.2178	0.00129177	0.0283055
ENSDARG00000030012	lrrfip1a	336.321	1.37764	0.448112	3.07432	0.00210982	0.0376988
ENSDARG00000061904	fhod3b	129.676	1.37507	0.466193	2.94958	0.00318206	0.0494663
ENSDARG00000075954	serpinh1a	1107.75	1.36995	0.46194	2.96564	0.00302054	0.0482583
ENSDARG00000027500	oxsr1b	308.853	1.36874	0.443943	3.08313	0.00204835	0.0370007
ENSDARG00000075556	luzp1	542.072	1.36859	0.423496	3.23164	0.00123081	0.027522
ENSDARG00000022399	ntmt1	393.246	1.36618	0.462599	2.95326	0.00314435	0.0491963
ENSDARG00000103546	purbb	337.431	1.36538	0.428392	3.18722	0.00143646	0.0303835
ENSDARG00000098237	fbn2b	5048.18	1.36348	0.435764	3.12895	0.00175435	0.0338051
ENSDARG00000001999	adamts18	189.139	1.3626	0.455581	2.99091	0.00278145	0.0458136
ENSDARG00000075759	samd4a	434.015	1.35038	0.415858	3.24721	0.00116541	0.0266361
ENSDARG00000037030	casz1	691.174	1.34294	0.438961	3.05935	0.00221816	0.038832
ENSDARG00000078026	zcchc24	351.974	1.33941	0.44761	2.99237	0.00276823	0.0457828
ENSDARG00000100651	PDCL3	230.22	1.33741	0.439283	3.04453	0.00233042	0.0401564
ENSDARG00000052061	col4a6	2214.79	1.32614	0.422167	3.14126	0.00168221	0.0328999
ENSDARG00000004196	tnfsf10l	417.745	1.3244	0.422941	3.13142	0.00173965	0.0337193
ENSDARG00000078430	tiam1a	484.559	1.32233	0.386628	3.42016	0.000625843	0.0177261
ENSDARG00000034643	fhl3a	212.044	1.31961	0.44089	2.99306	0.00276197	0.0457276
ENSDARG00000076729	myo9aa	431.901	1.31906	0.406537	3.24462	0.00117608	0.0267684
ENSDARG00000042652	rreb1b	573.543	1.31494	0.384183	3.4227	0.000620027	0.0176525
ENSDARG00000076564	hspg2	2270.42	1.31421	0.425519	3.08849	0.00201178	0.0365407
ENSDARG00000026862	aktip	152.697	1.31101	0.440832	2.97393	0.00294007	0.0474797
ENSDARG00000105080	CABZ01057891.1	204.243	1.30779	0.436943	2.99304	0.00276211	0.0457276
ENSDARG00000000551	slc1a4	326.342	1.29836	0.437693	2.96637	0.00301338	0.0482557
ENSDARG00000069904	CABZ01071903.1	210.361	1.27675	0.423828	3.01243	0.00259169	0.0435132
ENSDARG00000104393	npr2	213.762	1.27518	0.428868	2.97335	0.00294566	0.0475233
ENSDARG00000039093	got1	853.414	1.27132	0.387118	3.28408	0.00102317	0.024758
ENSDARG00000098294	col5a3a	435.116	1.26541	0.387748	3.26349	0.00110051	0.0256515
ENSDARG00000068246	plcb3	319.593	1.2652	0.406508	3.11236	0.00185596	0.0348818
ENSDARG00000076229	mrtfab	351.092	1.25647	0.4089	3.07281	0.00212057	0.0377663
ENSDARG00000079756	peak1	440.365	1.25426	0.422244	2.97046	0.00297353	0.047879
ENSDARG00000104484	itgb1b	863.919	1.24657	0.407623	3.05815	0.00222709	0.0389469
ENSDARG00000109929	ITGB1	444.658	1.24646	0.409363	3.04487	0.00232781	0.0401535
ENSDARG00000101569	ppargc1b	659.477	1.22891	0.385795	3.1854	0.00144556	0.0304585
ENSDARG00000006301	RAPH1	380.108	1.22542	0.400966	3.05616	0.0022419	0.0390812
ENSDARG00000062082	hipk3b	365.263	1.2228	0.397794	3.07395	0.00211243	0.0376988
ENSDARG00000098431	comp	983.637	1.20931	0.373126	3.24101	0.00119108	0.0269607
ENSDARG00000053362	cilp	822.506	1.20355	0.389114	3.09306	0.00198105	0.0360622
ENSDARG00000025091	ezrb	284.312	1.20152	0.405317	2.96439	0.00303286	0.0484081
ENSDARG00000101074	glud1b	1158.06	1.16284	0.391722	2.96853	0.00299228	0.0480257
ENSDARG00000020845	tns1b	921.044	1.15226	0.386423	2.98187	0.00286495	0.0467251

## Sheet: Table S4
Supplemental Table 4: Differentially accessible regions (DARs) that exhibit greater accessibility in the sox17E 28 hpf compared to sox17M 28hpf population.
DARs were calculated using DiffBind version 3.0.15 (Stark and Brown, 2011) with the DESeq2 option (Love, Huber and Anders, 2014), on the broad peaks files (.broadPeak) produced by MACS2. R version 4.2.1 (R Core Team, 2021) was used for this processing.
chrom	chromStart	chromEnd	names	FDR score	strand
12	31073248	31076146	18359	1.51645e-18	*
16	32517491	32518839	39718	1.17305e-16	*
13	13250026	13252379	21827	5.33416e-16	*
24	21245510	21247730	86337	7.99256e-16	*
20	30148383	30149516	67392	9.05379e-16	*
5	17710429	17711352	104900	1.05747e-15	*
5	17673530	17676436	104892	1.94854e-15	*
20	21458385	21459642	66232	4.87676e-15	*
17	36029624	36033582	46081	5.2653e-15	*
16	19441889	19447229	38301	1.02123e-14	*
12	42547133	42548919	19541	1.07696e-14	*
18	40326295	40327465	51924	1.10948e-14	*
3	18108304	18110653	93962	1.10948e-14	*
15	28715042	28716054	34199	1.10948e-14	*
23	17720372	17721740	80534	1.38593e-14	*
2	15146738	15148023	59817	3.06222e-14	*
10	10843653	10844911	6948	3.54173e-14	*
2	4083993	4085370	59027	4.70754e-14	*
7	62058319	62060916	123711	5.07169e-14	*
17	34795697	34796548	45921	5.07169e-14	*
11	42030251	42031462	14896	5.4886e-14	*
10	31156364	31156970	8751	5.78503e-14	*
24	8542986	8545115	85296	5.84779e-14	*
16	29247442	29248284	39335	7.95319e-14	*
21	20712954	20717738	72494	8.57044e-14	*
4	18666042	18666615	101620	1.81269e-13	*
23	7838046	7839578	79783	1.83722e-13	*
14	35098967	35099883	29592	1.97965e-13	*
18	38436519	38437686	51713	2.20076e-13	*
19	6258032	6258904	54143	2.50787e-13	*
19	28217789	28219182	56146	2.50787e-13	*
21	23608271	23609597	72798	3.18618e-13	*
13	30445547	30446839	23698	3.19476e-13	*
14	26637713	26640057	28555	3.75964e-13	*
14	36372660	36374874	29783	4.45417e-13	*
5	52104745	52106758	108809	5.63158e-13	*
22	28787947	28792834	77821	5.72868e-13	*
3	53683694	53685933	97771	8.81292e-13	*
2	35692384	35693247	61895	8.93882e-13	*
14	42157235	42158725	30418	1.01425e-12	*
5	52071651	52073374	108797	1.25289e-12	*
19	31811408	31812160	56600	1.25289e-12	*
23	27223313	27224381	81755	1.25497e-12	*
3	25027292	25028114	94928	1.51623e-12	*
15	29700647	29701908	34350	1.53546e-12	*
19	30773709	30774985	56451	1.80701e-12	*
14	42148550	42150104	30416	1.82587e-12	*
16	33248662	33249622	39820	1.86564e-12	*
22	10797467	10799357	75972	2.17122e-12	*
14	31109693	31111490	29001	2.36207e-12	*
7	33595514	33597188	120581	2.66786e-12	*
24	27680704	27682075	87093	2.72711e-12	*
19	41565292	41566695	57639	3.31006e-12	*
3	46810444	46820251	97280	3.44887e-12	*
23	21471027	21472152	80932	3.90025e-12	*
14	42169078	42175912	30422	4.81091e-12	*
6	6561278	6563285	111484	4.91586e-12	*
7	46384199	46386623	122188	5.21769e-12	*
5	65774373	65775502	109873	5.2391e-12	*
7	55887862	55889832	123245	5.35695e-12	*
1	39612620	39614094	3590	5.6912e-12	*
18	30306571	30308691	51136	6.54737e-12	*
7	36978784	36980381	121138	6.66774e-12	*
24	4584904	4586566	84833	6.85421e-12	*
7	14334088	14335545	117973	7.10686e-12	*
1	7763295	7764439	927	7.56575e-12	*
20	33340606	33341676	67817	7.56575e-12	*
17	24349576	24351421	44681	8.3724e-12	*
5	19679693	19680821	105124	9.74373e-12	*
3	41863974	41864887	96935	1.06167e-11	*
13	46432275	46433904	25455	1.07373e-11	*
7	34186031	34187302	120675	1.08493e-11	*
18	15372626	15374904	49372	1.08493e-11	*
16	38100958	38101841	40356	1.10432e-11	*
7	21050003	21051446	118745	1.20143e-11	*
11	42035168	42039448	14898	1.23484e-11	*
12	45745218	45746192	19856	1.35026e-11	*
18	23984094	23985448	50568	1.43433e-11	*
3	24155789	24156590	94827	1.56643e-11	*
7	44720527	44721768	122050	1.64308e-11	*
18	20278750	20280280	50041	1.68048e-11	*
9	46196723	46197643	135255	1.68323e-11	*
17	26559483	26560491	44944	1.71526e-11	*
24	17167358	17168889	85982	1.95528e-11	*
8	14510807	14513203	126353	2.13165e-11	*
7	39165967	39170910	121465	2.19873e-11	*
20	14843590	14844638	65600	2.2509e-11	*
20	39014499	39015575	68477	2.31985e-11	*
22	418104	418980	74924	2.34259e-11	*
22	3624482	3625726	75375	2.47915e-11	*
14	39545936	39547300	30113	2.83596e-11	*
5	39721412	39722825	107533	2.8422e-11	*
11	25822713	25825555	13150	2.91199e-11	*
1	24020120	24022050	2275	3.04726e-11	*
22	21467769	21469040	77326	3.24804e-11	*
8	47028263	47029103	129498	3.30131e-11	*
18	20271447	20274095	50039	3.65125e-11	*
15	40668419	40669896	35658	3.75552e-11	*
21	20703512	20704936	72491	3.97102e-11	*
11	16354898	16356481	12045	3.97102e-11	*
5	17321401	17323320	104822	4.30752e-11	*
13	30487157	30488523	23709	4.54822e-11	*
3	41868228	41869112	96936	4.58729e-11	*
16	11089045	11090492	37719	4.68495e-11	*
16	33494062	33496141	39868	4.86198e-11	*
24	17194755	17195720	85992	5.74536e-11	*
24	38830745	38831931	88178	6.40791e-11	*
18	44173530	44174473	52304	6.47051e-11	*
1	23843665	23845954	2251	7.44333e-11	*
3	36056354	36058832	96344	7.64169e-11	*
2	11747473	11748814	59669	7.67805e-11	*
23	2116060	2117110	79113	8.14571e-11	*
2	18280677	18281585	60062	8.41843e-11	*
5	52094710	52096264	108806	8.72556e-11	*
10	43884213	43885784	10194	8.90739e-11	*
2	49267867	49269547	63411	9.16018e-11	*
18	30321933	30323385	51142	9.16018e-11	*
22	20973879	20975531	77256	1.03188e-10	*
9	13387735	13389198	131804	1.04203e-10	*
10	10209478	10211480	6893	1.04919e-10	*
6	45910309	45911407	115267	1.31868e-10	*
23	32834144	32835079	82558	1.34279e-10	*
16	33415916	33418939	39849	1.34285e-10	*
9	37042090	37044618	134255	1.38393e-10	*
9	6701428	6702859	131155	1.38779e-10	*
4	12295096	12295839	100644	1.40544e-10	*
11	18977077	18977723	12287	1.44204e-10	*
17	18645887	18646674	44070	1.46667e-10	*
20	30157114	30158095	67394	1.52743e-10	*
20	17749849	17751226	65822	1.52743e-10	*
3	25721369	25722748	95011	1.56299e-10	*
KN150573.1	2574	3598	137763	1.65648e-10	*
6	19815126	19818601	112693	1.83598e-10	*
13	46467747	46468498	25464	1.94751e-10	*
13	6022428	6023439	21148	1.97684e-10	*
10	38131852	38132922	9566	1.98113e-10	*
7	35884241	35886262	120963	2.2312e-10	*
8	3139536	3140966	125208	2.30253e-10	*
16	21061468	21062736	38493	2.34134e-10	*
22	16946403	16949462	76748	2.34134e-10	*
7	31574967	31576661	120266	2.37603e-10	*
6	6551695	6553397	111481	2.37888e-10	*
15	39504648	39505922	35525	2.47828e-10	*
9	46439344	46440087	135285	2.70432e-10	*
3	46886772	46888830	97287	2.74611e-10	*
5	51675448	51676614	108751	2.85537e-10	*
15	14515076	14516559	32558	2.95155e-10	*
5	36025066	36026752	107079	2.95646e-10	*
25	848654	849579	88808	3.1908e-10	*
3	55837905	55840855	98029	3.26734e-10	*
8	10078437	10079380	125913	3.35336e-10	*
16	19482635	19485097	38306	3.60876e-10	*
10	22067556	22068665	7819	3.92504e-10	*
23	6231992	6234202	79611	3.92504e-10	*
17	35865175	35866335	46047	4.3324e-10	*
10	31580925	31581865	8842	4.38443e-10	*
22	18729294	18732805	77006	4.38726e-10	*
6	36697333	36698441	114311	4.571e-10	*
6	36513766	36514995	114270	4.63655e-10	*
20	33336474	33337470	67816	4.74081e-10	*
5	36680607	36681616	107180	4.85966e-10	*
20	24951688	24953430	66696	5.11755e-10	*
2	11754703	11758674	59670	5.32681e-10	*
5	17363096	17365395	104831	5.64873e-10	*
6	44909686	44911022	115212	5.85819e-10	*
8	23765034	23766119	127578	5.87646e-10	*
4	16663678	16664683	101323	5.91569e-10	*
16	29239969	29240872	39331	6.59996e-10	*
20	21207701	21208248	66191	6.75783e-10	*
13	28538895	28539981	23441	6.81448e-10	*
20	21411991	21414853	66221	6.86263e-10	*
6	50475340	50476527	115718	7.04389e-10	*
16	9873916	9874817	37578	7.30838e-10	*
18	20176109	20177182	50014	7.32556e-10	*
15	18045907	18046787	32885	7.35063e-10	*
5	36308452	36309525	107120	7.44542e-10	*
7	68753718	68754944	124232	7.74468e-10	*
2	32041080	32041634	61483	8.05408e-10	*
22	18265011	18266307	76916	8.21002e-10	*
15	14504199	14504915	32555	8.38793e-10	*
6	56301967	56302760	116407	8.81842e-10	*
7	29881027	29881767	119983	9.24971e-10	*
20	39958337	39959687	68590	9.75785e-10	*
9	30749604	30750201	133556	9.95152e-10	*
5	19411562	19413304	105076	1.02701e-09	*
7	53822441	53824004	122956	1.06573e-09	*
18	26923312	26924295	50905	1.10402e-09	*
20	49219063	49219754	69462	1.16685e-09	*
7	8810802	8811535	117440	1.16685e-09	*
2	33979568	33989039	61771	1.19286e-09	*
10	27409678	27411566	8366	1.24371e-09	*
22	20374707	20379389	77175	1.24897e-09	*
17	27212706	27213302	45037	1.24897e-09	*
11	42041123	42045989	14899	1.25806e-09	*
15	33058810	33060183	34752	1.27917e-09	*
13	46575820	46576686	25480	1.31834e-09	*
5	28623893	28627302	106171	1.31834e-09	*
16	29539367	29540722	39376	1.32843e-09	*
7	48622922	48624013	122431	1.33346e-09	*
5	67400500	67401510	110026	1.33703e-09	*
6	13973881	13974679	112222	1.36104e-09	*
20	43856149	43857151	68921	1.36744e-09	*
9	23108546	23110184	132744	1.38659e-09	*
13	13970116	13971730	21906	1.43392e-09	*
16	33484254	33485640	39865	1.45231e-09	*
21	23578138	23579593	72792	1.45258e-09	*
KN150573.1	16284	17465	137766	1.49903e-09	*
10	27292449	27294126	8340	1.54064e-09	*
10	38381553	38382959	9620	1.54518e-09	*
23	5530725	5531722	79526	1.56478e-09	*
24	10649236	10651282	85517	1.62788e-09	*
1	37226655	37227806	3313	1.62788e-09	*
11	6111203	6111924	11229	1.62961e-09	*
7	15980262	15981424	118145	1.65916e-09	*
24	21306594	21307745	86356	1.66177e-09	*
9	13470821	13471271	131819	1.67434e-09	*
7	21101982	21104196	118759	1.6871e-09	*
5	66009959	66010617	109906	1.81685e-09	*
10	32135336	32136480	8927	2.03685e-09	*
22	23318236	23319088	77559	2.06424e-09	*
17	34212831	34214214	45844	2.1986e-09	*
7	21114421	21115478	118761	2.20537e-09	*
7	12150625	12151437	117738	2.20627e-09	*
13	1616103	1616831	20547	2.20627e-09	*
20	10104919	10107837	65380	2.23918e-09	*
25	36512099	36514423	92159	2.26269e-09	*
10	31407230	31408141	8805	2.26269e-09	*
12	25563472	25566372	17680	2.26269e-09	*
13	39933138	39933951	24853	2.28526e-09	*
1	7778931	7779366	934	2.28526e-09	*
5	29971217	29972870	106311	2.30322e-09	*
3	43319151	43320797	97053	2.30723e-09	*
17	41883452	41886040	46600	2.4711e-09	*
6	50648690	50650045	115751	2.50266e-09	*
1	40415733	40417283	3699	2.54967e-09	*
16	16837704	16838806	38144	2.60497e-09	*
20	33431141	33431907	67845	2.63411e-09	*
9	53105301	53106278	135883	2.67471e-09	*
10	10922776	10923300	6965	2.68466e-09	*
24	27633479	27635410	87091	2.7045e-09	*
1	17649712	17650660	1726	2.71303e-09	*
2	31270713	31271367	61377	2.78812e-09	*
12	25496354	25497354	17669	2.94476e-09	*
18	25952132	25953374	50820	2.96174e-09	*
21	41153344	41154913	74312	3.0169e-09	*
10	27239154	27239967	8326	3.0528e-09	*
4	17477978	17480907	101493	3.16014e-09	*
23	23115693	23117244	81177	3.22345e-09	*
21	37123020	37124523	73906	3.27423e-09	*
13	10356902	10357467	21544	3.38901e-09	*
24	10636414	10637718	85515	3.38926e-09	*
14	49695766	49697230	31101	3.40506e-09	*
14	26542198	26542772	28535	3.45605e-09	*
19	15595896	15597414	55018	3.55556e-09	*
3	47378941	47380203	97329	3.55556e-09	*
7	34130285	34132143	120664	3.60336e-09	*
9	46874829	46876028	135317	3.69432e-09	*
5	25489698	25490577	105840	3.69675e-09	*
25	14927003	14928491	90248	3.72291e-09	*
14	39906601	39907944	30161	3.73256e-09	*
20	48978056	48979305	69438	3.74072e-09	*
17	52953827	52955191	47537	3.85027e-09	*
18	862893	864858	47821	3.89766e-09	*
14	32725059	32725805	29244	3.91523e-09	*
5	27511529	27512896	106043	3.97795e-09	*
14	32714321	32715894	29240	4.00688e-09	*
21	24587783	24590195	72896	4.00734e-09	*
23	26988130	26989031	81710	4.01796e-09	*
6	8165646	8166687	111683	4.05722e-09	*
18	22659645	22660705	50336	4.13265e-09	*
15	21368227	21369737	33219	4.17437e-09	*
14	31119598	31120271	29004	4.17437e-09	*
13	30443760	30444614	23697	4.24047e-09	*
14	25913759	25914104	28451	4.24899e-09	*
18	45022229	45022914	52406	4.25317e-09	*
7	49778960	49780293	122552	4.29148e-09	*
14	40227501	40228812	30208	4.35085e-09	*
17	32849113	32850769	45696	4.38324e-09	*
5	19516393	19517705	105086	4.58539e-09	*
13	29742245	29742907	23584	4.61834e-09	*
10	38117118	38118527	9561	4.74509e-09	*
10	43510714	43511274	10112	4.74509e-09	*
19	28913395	28914161	56227	4.8047e-09	*
5	44492441	44494252	108040	4.9339e-09	*
10	22622783	22623984	7877	5.03053e-09	*
13	45974532	45975686	25368	5.07276e-09	*
23	21453576	21455277	80926	5.11101e-09	*
1	29839121	29839848	2746	5.13104e-09	*
11	29562492	29563681	13556	5.40577e-09	*
17	27399794	27403593	45082	5.45492e-09	*
5	36693459	36696281	107184	5.48026e-09	*
22	12401453	12402710	76252	5.56212e-09	*
2	54463324	54464261	63823	5.56212e-09	*
5	66577032	66578482	109950	5.56212e-09	*
21	6349232	6350082	70936	5.63939e-09	*
6	33453611	33454450	114001	5.64673e-09	*
24	14142967	14143773	85774	5.70355e-09	*
16	35691845	35692523	40156	5.77454e-09	*
23	22860090	22862677	81108	5.80447e-09	*
19	42983036	42984828	57840	5.80558e-09	*
18	44269369	44270866	52330	6.02663e-09	*
17	37898288	37899243	46267	6.04453e-09	*
12	35878330	35879760	18967	6.04991e-09	*
3	53148554	53150396	97698	6.04991e-09	*
2	40030445	40031620	62360	6.10765e-09	*
5	35090416	35092315	106981	6.12025e-09	*
10	4124484	4125331	6376	6.1292e-09	*
16	14394918	14398575	37996	6.16378e-09	*
5	44533514	44534835	108051	6.21544e-09	*
5	49550205	49551417	108523	6.21544e-09	*
22	3668588	3671144	75390	6.25887e-09	*
7	19558438	19560231	118550	6.3265e-09	*
15	20023341	20025221	33052	6.46754e-09	*
6	6526639	6527485	111474	6.53978e-09	*
6	18749900	18751335	112621	6.54021e-09	*
1	34668899	34669365	3059	6.64716e-09	*
23	24717514	24718021	81457	6.76412e-09	*
17	16719462	16720695	43846	7.00865e-09	*
12	24828387	24829224	17574	7.0105e-09	*
19	45522991	45523849	58070	7.04969e-09	*
16	46253277	46253845	41316	7.10725e-09	*
6	30427634	30430781	113618	7.28002e-09	*
16	8480674	8481513	37481	7.53543e-09	*
15	32924909	32925484	34723	7.59256e-09	*
12	34587952	34589265	18768	7.87777e-09	*
9	53280602	53282169	135907	7.88641e-09	*
2	40989523	40990562	62471	7.94278e-09	*
22	18299444	18300140	76928	8.12303e-09	*
1	50897874	50898919	4797	8.1257e-09	*
5	19701865	19702653	105132	8.32607e-09	*
7	73639384	73640875	124724	8.76088e-09	*
20	20559490	20560738	66091	8.76088e-09	*
21	20701611	20702338	72490	9.05479e-09	*
20	17762236	17764890	65827	9.12563e-09	*
19	20886007	20886652	55426	9.22878e-09	*
7	19134687	19136115	118518	9.45762e-09	*
16	449356	451315	36580	9.71444e-09	*
20	30818582	30821452	67480	9.71444e-09	*
10	10837133	10837882	6947	9.93027e-09	*
22	3638575	3639305	75381	1.01124e-08	*
24	23260481	23262672	86552	1.05398e-08	*
18	47884602	47886133	52746	1.06225e-08	*
21	20604399	20605467	72472	1.06689e-08	*
12	42542951	42544126	19539	1.07923e-08	*
21	8509509	8510128	71204	1.07991e-08	*
8	33290016	33291191	128584	1.07991e-08	*
12	26670184	26670862	17829	1.07991e-08	*
20	48994341	48995320	69442	1.09361e-08	*
17	18320828	18321720	44037	1.12634e-08	*
14	16406241	16407589	27644	1.14834e-08	*
7	28580598	28582495	119835	1.15207e-08	*
17	36308652	36309606	46105	1.16393e-08	*
7	54805283	54806134	123097	1.19296e-08	*
21	20506486	20507476	72443	1.201e-08	*
19	41577690	41579139	57642	1.2057e-08	*
7	48658130	48659185	122438	1.21198e-08	*
7	54903735	54905295	123118	1.21761e-08	*
12	2446045	2447169	15836	1.25845e-08	*
19	30631929	30634348	56428	1.25908e-08	*
7	65826427	65827451	123910	1.26083e-08	*
18	30454808	30456383	51185	1.27203e-08	*
5	19690674	19692240	105128	1.27803e-08	*
6	14891611	14893412	112335	1.28439e-08	*
21	20607213	20609308	72473	1.29425e-08	*
13	25170351	25171491	23000	1.29425e-08	*
12	38609602	38610382	19305	1.30843e-08	*
18	49305869	49308009	52949	1.34681e-08	*
9	23150508	23152553	132756	1.34681e-08	*
20	24776867	24777958	66670	1.34713e-08	*
18	17934937	17935689	49704	1.34818e-08	*
15	28754502	28756004	34214	1.35019e-08	*
20	33390061	33391331	67831	1.36144e-08	*
21	7460104	7461604	71070	1.3637e-08	*
1	13296049	13297255	1376	1.36703e-08	*
13	11478078	11478892	21692	1.3802e-08	*
5	52075310	52077232	108798	1.3802e-08	*
8	10296252	10297324	125953	1.39685e-08	*
13	637596	639099	20415	1.42709e-08	*
5	48947167	48947848	108439	1.43091e-08	*
11	5425969	5427179	11151	1.44776e-08	*
6	33419246	33420191	113991	1.47791e-08	*
15	14039118	14040785	32514	1.47931e-08	*
17	37960700	37962165	46281	1.50083e-08	*
8	33019134	33021352	128544	1.52701e-08	*
20	27116778	27117536	67009	1.53935e-08	*
11	21736917	21738000	12566	1.56323e-08	*
6	26706300	26707465	113225	1.61327e-08	*
3	62509209	62511486	98731	1.62692e-08	*
2	21789374	21791685	60357	1.63334e-08	*
7	65820258	65821328	123908	1.65628e-08	*
6	47013288	47013879	115353	1.66652e-08	*
15	32933431	32934248	34726	1.67163e-08	*
7	34152137	34153073	120668	1.68172e-08	*
16	46268815	46270678	41319	1.68926e-08	*
8	4712658	4713746	125395	1.72292e-08	*
6	32739958	32740876	113921	1.72589e-08	*
23	36023000	36024930	82980	1.73547e-08	*
5	50571995	50574313	108688	1.76092e-08	*
2	9574605	9575699	59491	1.76108e-08	*
24	26857716	26858909	86994	1.78175e-08	*
17	37757636	37758599	46231	1.79029e-08	*
7	52526802	52528192	122803	1.80721e-08	*
12	2380735	2381287	15827	1.80721e-08	*
13	13421898	13423489	21851	1.83855e-08	*
24	9237341	9238568	85365	1.85118e-08	*
21	17732133	17733419	72118	1.89241e-08	*
18	20219626	20221589	50023	1.89241e-08	*
7	53374402	53375904	122893	1.92864e-08	*
7	20991621	20992735	118727	1.93672e-08	*
22	19604658	19606360	77082	1.94456e-08	*
10	10318550	10321842	6914	1.97977e-08	*
12	26843282	26845229	17864	1.99941e-08	*
8	23472145	23472958	127509	2.02816e-08	*
5	49580306	49580957	108529	2.04306e-08	*
19	26102706	26104827	55964	2.05922e-08	*
9	7592666	7593986	131238	2.05922e-08	*
7	19551060	19555371	118548	2.15316e-08	*
11	18979645	18982008	12288	2.15928e-08	*
7	73580075	73581292	124715	2.18734e-08	*
9	50306797	50307954	135628	2.19058e-08	*
22	16950971	16951764	76749	2.2048e-08	*
17	35996710	35998169	46076	2.32519e-08	*
7	35854864	35856472	120954	2.33462e-08	*
20	29952813	29953948	67359	2.36845e-08	*
13	30002077	30002822	23626	2.37509e-08	*
5	57525589	57527113	109193	2.37898e-08	*
5	64830945	64831598	109790	2.41848e-08	*
23	45704574	45705686	84048	2.45728e-08	*
17	50526041	50527478	47212	2.47268e-08	*
6	4583778	4584921	111318	2.49797e-08	*
2	7960416	7961423	59394	2.49996e-08	*
18	43065885	43068355	52186	2.54767e-08	*
25	14775379	14776332	90225	2.55153e-08	*
21	10699022	10699501	71373	2.61353e-08	*
9	38852421	38853119	134476	2.63671e-08	*
24	27610984	27611672	87088	2.68222e-08	*
15	8452692	8453763	32178	2.76476e-08	*
23	18868202	18872281	80633	2.76872e-08	*
13	28853821	28855100	23490	2.86325e-08	*
20	37586749	37588046	68300	2.89049e-08	*
23	37803083	37804691	83235	2.89049e-08	*
6	47426186	47427551	115379	2.93449e-08	*
20	45935026	45936247	69103	2.93799e-08	*
24	8090403	8091525	85247	3.00115e-08	*
6	11864445	11867732	112006	3.00115e-08	*
6	43279813	43280702	114951	3.02722e-08	*
20	32451614	32452826	67714	3.09441e-08	*
12	22254934	22257843	17280	3.11807e-08	*
13	39899806	39901168	24849	3.19067e-08	*
15	8917607	8918793	32254	3.27063e-08	*
21	37336632	37339926	73950	3.28206e-08	*
13	28385387	28387099	23410	3.36698e-08	*
5	34635957	34639738	106907	3.40702e-08	*
7	68098047	68099166	124098	3.41512e-08	*
17	11320744	11322692	43342	3.46067e-08	*
23	27127196	27127761	81729	3.66172e-08	*
22	16523862	16526780	76680	3.70372e-08	*
2	50365842	50366673	63504	3.76165e-08	*
25	15046516	15048757	90269	3.82793e-08	*
23	27152430	27153350	81738	3.82892e-08	*
6	33539438	33544761	114021	3.84669e-08	*
16	4681171	4681863	37035	3.88834e-08	*
KN150659.1	10647	11624	137948	3.89089e-08	*
20	17795612	17796413	65835	3.89789e-08	*
5	17504406	17505253	104852	4.02396e-08	*
20	43287269	43288368	68871	4.04096e-08	*
10	27155621	27157647	8301	4.06523e-08	*
7	40340397	40341078	121589	4.0938e-08	*
4	19463715	19464638	101706	4.09524e-08	*
7	20230735	20232159	118629	4.1544e-08	*
7	52557370	52558992	122815	4.24109e-08	*
18	34142175	34144630	51331	4.24706e-08	*
24	23307683	23310115	86569	4.24706e-08	*
19	29761110	29763297	56330	4.24706e-08	*
18	22162749	22163480	50254	4.25123e-08	*
24	35091297	35092457	87766	4.29074e-08	*
2	5753337	5754730	59233	4.34032e-08	*
2	8327987	8328488	59426	4.34691e-08	*
13	17088013	17088611	22146	4.37676e-08	*
5	14613934	14614989	104478	4.37716e-08	*
7	35859379	35860670	120955	4.46316e-08	*
4	17429966	17431805	101481	4.46316e-08	*
2	27516236	27518513	60979	4.46316e-08	*
13	22290733	22292053	22667	4.46781e-08	*
2	24535315	24543885	60647	4.59908e-08	*
2	30658329	30659861	61321	4.63555e-08	*
17	21099862	21101217	44294	4.6469e-08	*
5	48002126	48005895	108293	4.69762e-08	*
19	37596451	37597073	57272	4.75784e-08	*
6	44096476	44097443	115076	4.75784e-08	*
15	28698540	28700194	34192	4.86912e-08	*
7	49553451	49554737	122520	4.89732e-08	*
7	54834125	54835242	123103	4.92857e-08	*
12	23699597	23700601	17451	4.95563e-08	*
22	11221455	11222640	76056	4.96614e-08	*
8	19735663	19736649	127051	5.02024e-08	*
2	5775522	5777246	59238	5.05322e-08	*
17	10904460	10905492	43253	5.06167e-08	*
3	26441847	26444145	95117	5.24701e-08	*
2	40273203	40274482	62399	5.24701e-08	*
13	11259345	11260257	21657	5.26937e-08	*
2	24533132	24533926	60646	5.37674e-08	*
3	23367613	23368870	94626	5.45883e-08	*
23	1788457	1789572	79060	5.48355e-08	*
10	42354139	42355223	9994	5.53648e-08	*
7	68267191	68268481	124121	5.54152e-08	*
11	20029651	20032400	12385	5.55025e-08	*
20	21523364	21524563	66244	5.60423e-08	*
19	13372014	13372809	54826	5.63432e-08	*
19	6289503	6290760	54148	5.67478e-08	*
1	24160078	24161107	2300	5.70124e-08	*
15	39588367	39590356	35552	5.83996e-08	*
15	20011602	20013589	33048	5.85984e-08	*
1	47227647	47229517	4437	5.9352e-08	*
13	25951867	25953242	23116	6.06502e-08	*
8	18893317	18895012	126898	6.07781e-08	*
3	17212067	17212830	93838	6.10672e-08	*
14	42165035	42166194	30421	6.16209e-08	*
16	42401356	42403196	40922	6.16209e-08	*
5	56236172	56236838	109078	6.1703e-08	*
12	44927722	44928871	19766	6.25517e-08	*
5	49573101	49573928	108527	6.35431e-08	*
9	53188488	53189346	135893	6.38441e-08	*
2	35800347	35801661	61927	6.3943e-08	*
24	19832961	19833656	86197	6.42305e-08	*
14	4239895	4240836	26708	6.42305e-08	*
22	10800482	10802120	75973	6.48138e-08	*
5	63602256	63603454	109665	6.54717e-08	*
7	33672959	33674479	120594	6.54811e-08	*
9	47201228	47202122	135348	6.67854e-08	*
5	49556018	49558653	108524	6.69669e-08	*
20	33392419	33393339	67832	6.71054e-08	*
3	30161633	30162284	95520	6.81588e-08	*
24	2419709	2420812	84533	6.81786e-08	*
2	4116875	4120223	59036	6.82284e-08	*
22	33003307	33003875	78173	6.94446e-08	*
1	46822463	46823129	4372	7.00322e-08	*
3	53552826	53555521	97753	7.09262e-08	*
7	36047528	36050764	121008	7.09436e-08	*
3	53541197	53546443	97750	7.10476e-08	*
5	48168882	48171699	108328	7.11267e-08	*
6	25630875	25631955	113115	7.11267e-08	*
13	28330094	28330847	23402	7.11267e-08	*
16	46276677	46277260	41321	7.18551e-08	*
6	47442511	47444090	115383	7.26084e-08	*
5	49982245	49984644	108618	7.26084e-08	*
16	53928692	53929522	42054	7.26084e-08	*
11	39226981	39228522	14557	7.27613e-08	*
18	37306753	37308922	51627	7.28306e-08	*
18	23989729	23990533	50569	7.31299e-08	*
11	28305342	28306977	13463	7.40109e-08	*
17	34959170	34959854	45943	7.42255e-08	*
7	68394025	68395115	124163	7.49383e-08	*
11	7571489	7572453	11397	7.52372e-08	*
9	47411939	47413799	135375	7.65385e-08	*
17	1971600	1973183	42534	7.69053e-08	*
19	32130115	32131429	56667	7.7998e-08	*
7	49591371	49592264	122527	7.94379e-08	*
23	27815688	27817519	81840	8.25038e-08	*
2	3121958	3123231	58917	8.32005e-08	*
11	15618895	15620027	11971	8.3384e-08	*
5	16066601	16068460	104708	8.3721e-08	*
15	14059226	14060290	32520	8.3721e-08	*
5	49662386	49663429	108547	8.43973e-08	*
25	31441361	31442229	91566	8.43973e-08	*
23	27230778	27231455	81757	8.51371e-08	*
20	35279479	35280551	68105	8.51371e-08	*
14	45132674	45133481	30662	8.59454e-08	*
7	26431860	26433026	119492	8.62102e-08	*
9	47795617	47796528	135435	8.62987e-08	*
17	10990025	10990947	43268	8.66443e-08	*
6	11822769	11824461	111994	8.66925e-08	*
21	23183510	23185432	72713	8.66978e-08	*
7	58097773	58099269	123469	8.75676e-08	*
17	44223962	44225345	46802	8.81258e-08	*
25	31293265	31294434	91545	8.82025e-08	*
4	15534875	15535658	101161	8.86777e-08	*
15	22396964	22397629	33342	8.97066e-08	*
24	9253250	9254348	85369	8.97419e-08	*
20	22679915	22682120	66383	9.36426e-08	*
19	37619779	37624307	57280	9.4124e-08	*
19	37605578	37607182	57274	9.46982e-08	*
3	6639599	6640237	92763	9.46982e-08	*
20	48275927	48276697	69356	9.50563e-08	*
18	25616140	25617440	50768	9.5326e-08	*
5	272541	274203	103167	9.60899e-08	*
10	13554223	13556859	7169	9.6959e-08	*
7	30345835	30346383	120050	9.75448e-08	*
3	38692183	38693382	96575	9.85556e-08	*
25	8577916	8579260	89724	1.00952e-07	*
7	33400444	33401692	120538	1.00957e-07	*
18	49359153	49360016	52961	1.00991e-07	*
19	31835325	31835887	56608	1.01092e-07	*
5	14992697	14993257	104527	1.01793e-07	*
1	24062471	24064048	2282	1.01964e-07	*
23	13754593	13756834	80216	1.08598e-07	*
2	26986855	26988496	60921	1.08777e-07	*
23	2330846	2333110	79151	1.08837e-07	*
5	49817851	49818837	108583	1.08969e-07	*
24	19514903	19516469	86144	1.10948e-07	*
21	12792089	12793441	71592	1.11126e-07	*
10	31469200	31470749	8821	1.1293e-07	*
5	19736017	19737843	105144	1.14767e-07	*
24	17199101	17202137	85994	1.15874e-07	*
8	27829726	27830861	127996	1.1602e-07	*
13	16990619	16991883	22129	1.1636e-07	*
16	46220946	46221416	41303	1.17548e-07	*
7	65891267	65892506	123925	1.18137e-07	*
6	206544	207971	110706	1.18498e-07	*
24	23293511	23296358	86563	1.20298e-07	*
17	35108011	35108950	45956	1.20298e-07	*
23	27139828	27141180	81733	1.20457e-07	*
8	33328076	33328864	128595	1.21672e-07	*
9	17441578	17442550	132213	1.2176e-07	*
20	34436636	34437265	67962	1.2176e-07	*
21	20590040	20592215	72468	1.26825e-07	*
22	17041442	17042312	76772	1.27101e-07	*
15	28288632	28289635	34119	1.27195e-07	*
24	13956987	13957997	85744	1.27816e-07	*
7	14358913	14359505	117981	1.28355e-07	*
13	22600463	22601440	22702	1.31643e-07	*
11	28370371	28371474	13480	1.3186e-07	*
15	24614612	24615594	33599	1.35463e-07	*
7	55921154	55921685	123253	1.35463e-07	*
9	13015831	13016900	131753	1.38475e-07	*
6	43675307	43678406	115005	1.39003e-07	*
17	19597893	19598680	44157	1.41259e-07	*
24	34335066	34337130	87693	1.41342e-07	*
22	16988272	16988870	76763	1.41498e-07	*
7	11906571	11908837	117694	1.41687e-07	*
5	34666455	34667129	106916	1.42017e-07	*
13	43250915	43251808	25122	1.43233e-07	*
3	14084381	14086886	93454	1.43861e-07	*
3	34386311	34387858	96123	1.44376e-07	*
7	48606477	48608120	122427	1.44555e-07	*
24	10467633	10468150	85497	1.4522e-07	*
4	16393975	16394482	101260	1.46071e-07	*
22	37341728	37347087	78604	1.46519e-07	*
23	13639492	13640529	80189	1.47751e-07	*
2	33105763	33110362	61633	1.48687e-07	*
10	23638149	23638856	7968	1.50154e-07	*
5	67615813	67617210	110055	1.51003e-07	*
9	28215237	28216083	133258	1.52751e-07	*
19	40267570	40269308	57491	1.52795e-07	*
20	30166200	30167907	67396	1.53571e-07	*
9	23353646	23355081	132797	1.54991e-07	*
25	2859126	2860550	89111	1.57224e-07	*
20	40325671	40327177	68640	1.57344e-07	*
3	53548542	53552145	97752	1.57929e-07	*
20	30848673	30849619	67490	1.58317e-07	*
2	45683412	45684567	63037	1.58544e-07	*
1	54011683	54016089	5239	1.59113e-07	*
10	28104085	28105256	8478	1.59462e-07	*
15	21334321	21335561	33211	1.60634e-07	*
5	66014002	66015182	109907	1.6083e-07	*
7	49751946	49752550	122546	1.61078e-07	*
6	4061001	4062404	111233	1.64081e-07	*
24	47314	48219	84161	1.64389e-07	*
10	13544633	13545294	7165	1.67854e-07	*
23	20902357	20903356	80879	1.68967e-07	*
15	8516413	8518401	32190	1.69762e-07	*
12	31003683	31007089	18336	1.70529e-07	*
13	26214730	26215775	23172	1.72929e-07	*
10	16100311	16100664	7359	1.74635e-07	*
4	15541805	15542729	101163	1.75743e-07	*
1	20278589	20279779	1965	1.75743e-07	*
12	34582593	34584041	18766	1.76227e-07	*
25	11323804	11324695	89910	1.76372e-07	*
24	8093952	8095346	85248	1.76622e-07	*
7	70857747	70858502	124443	1.78046e-07	*
7	11799824	11802133	117678	1.78302e-07	*
7	68351249	68353622	124146	1.80682e-07	*
24	1686668	1688286	84422	1.8152e-07	*
7	40976745	40977684	121673	1.84393e-07	*
14	32638404	32640675	29217	1.86629e-07	*
21	38706866	38707755	74130	1.87169e-07	*
8	50883766	50884579	129878	1.91284e-07	*
16	51141565	51142542	41752	1.91442e-07	*
5	41062100	41063345	107693	1.94859e-07	*
24	37963429	37964994	88085	1.95691e-07	*
7	26503685	26505080	119508	1.97756e-07	*
23	10050144	10051601	79962	2.01467e-07	*
5	64212702	64213818	109728	2.01557e-07	*
24	37948637	37950463	88079	2.0279e-07	*
KN149932.1	24491	25085	136644	2.0366e-07	*
24	34034819	34036075	87647	2.04479e-07	*
25	2622110	2623698	89072	2.05407e-07	*
KN150617.1	22475	23339	137852	2.0564e-07	*
9	2074794	2077193	130671	2.05787e-07	*
23	23336948	23337547	81219	2.06914e-07	*
8	53368038	53368716	130191	2.14716e-07	*
7	53771693	53772476	122944	2.1538e-07	*
20	47570109	47570868	69259	2.15721e-07	*
5	24205248	24207244	105639	2.19229e-07	*
1	50892154	50892706	4795	2.20221e-07	*
13	13064504	13065272	21807	2.20777e-07	*
22	18278164	18281908	76921	2.20777e-07	*
9	44215631	44216356	135042	2.20777e-07	*
12	24969425	24971043	17590	2.22195e-07	*
13	22057205	22059775	22632	2.22501e-07	*
7	68256217	68257395	124119	2.23162e-07	*
5	48015991	48017715	108296	2.25005e-07	*
1	16427677	16428355	1608	2.28595e-07	*
7	25306019	25307158	119338	2.28595e-07	*
1	47284393	47284946	4453	2.32665e-07	*
16	40328476	40329380	40654	2.33198e-07	*
9	53244601	53246409	135900	2.35867e-07	*
22	21620653	21624844	77353	2.39274e-07	*
19	1056418	1057384	53457	2.39825e-07	*
5	58950970	58951529	109289	2.46882e-07	*
7	31590040	31592085	120272	2.49086e-07	*
5	60444701	60445298	109368	2.50782e-07	*
25	8527968	8529030	89717	2.52941e-07	*
13	30256767	30257339	23658	2.53496e-07	*
2	32033582	32034182	61481	2.5374e-07	*
11	31356819	31358830	13760	2.5625e-07	*
5	50206821	50209839	108643	2.56704e-07	*
10	11701785	11702525	7067	2.57096e-07	*
18	19765370	19767434	49940	2.57131e-07	*
7	21678910	21680442	118830	2.5719e-07	*
18	19719039	19720983	49928	2.5719e-07	*
6	49669368	49670284	115624	2.61634e-07	*
14	31137766	31140530	29010	2.65125e-07	*
3	12933420	12934970	93292	2.65983e-07	*
10	27636366	27637231	8418	2.66324e-07	*
23	22734239	22735111	81068	2.70131e-07	*
19	25939234	25940352	55914	2.70131e-07	*
6	14777660	14779730	112317	2.70606e-07	*
7	19137773	19139006	118519	2.71827e-07	*
15	14052611	14053610	32518	2.7688e-07	*
2	45043938	45045102	62954	2.77248e-07	*
2	34105984	34108233	61802	2.77461e-07	*
9	20933841	20934646	132469	2.77739e-07	*
15	4497488	4500219	31925	2.78275e-07	*
12	25986184	25987010	17747	2.79936e-07	*
17	52852871	52853683	47503	2.80661e-07	*
11	8543296	8543948	11486	2.81393e-07	*
19	29732180	29732971	56320	2.81393e-07	*
16	11011079	11012495	37698	2.81468e-07	*
1	17373929	17375429	1679	2.81561e-07	*
3	18550663	18552400	94028	2.83063e-07	*
12	7784944	7785909	16275	2.83102e-07	*
7	65913722	65914194	123929	2.86828e-07	*
6	43326550	43327100	114965	2.86828e-07	*
8	2955771	2956504	125178	2.88483e-07	*
19	30783026	30784834	56454	2.89425e-07	*
8	4922979	4924476	125430	2.90756e-07	*
6	11237197	11238009	111950	2.94235e-07	*
12	8715421	8716103	16373	2.98529e-07	*
14	51045431	51046439	31178	3.00349e-07	*
23	27134976	27139306	81732	3.01938e-07	*
24	19841920	19842657	86199	3.04862e-07	*
10	28803140	28803705	8595	3.07487e-07	*
13	5395415	5396488	21026	3.08998e-07	*
9	7589248	7590921	131237	3.10577e-07	*
17	37342375	37344150	46170	3.11337e-07	*
1	49868663	49869785	4695	3.13594e-07	*
23	34327409	34329869	82759	3.13594e-07	*
14	5801714	5803189	26902	3.14302e-07	*
2	41671585	41672441	62554	3.15248e-07	*
7	37257184	37259780	121184	3.16235e-07	*
11	19386080	19386747	12335	3.16607e-07	*
1	39468697	39470842	3549	3.18192e-07	*
10	5924717	5925973	6543	3.19216e-07	*
19	27986731	27987410	56116	3.23901e-07	*
13	10595307	10595966	21579	3.2401e-07	*
10	4119790	4121489	6375	3.247e-07	*
18	6063136	6064598	48326	3.247e-07	*
11	28239128	28240581	13446	3.247e-07	*
16	1519964	1520642	36776	3.26941e-07	*
7	20268701	20269525	118637	3.27138e-07	*
14	31939534	31940206	29123	3.27536e-07	*
5	40791641	40792322	107668	3.30143e-07	*
22	11021634	11022360	76014	3.30614e-07	*
13	46636926	46637790	25489	3.35917e-07	*
11	26039714	26041420	13179	3.3631e-07	*
18	40347494	40348567	51928	3.36317e-07	*
18	7809904	7811103	48495	3.37209e-07	*
1	51516735	51518015	4912	3.46757e-07	*
16	8968023	8968570	37520	3.46757e-07	*
22	19570197	19571172	77075	3.46757e-07	*
1	46784536	46785752	4363	3.49983e-07	*
20	35227658	35228167	68091	3.53376e-07	*
7	16421024	16422162	118195	3.53612e-07	*
9	51630208	51630826	135738	3.54398e-07	*
16	42903621	42904943	40996	3.55638e-07	*
15	29769263	29770917	34368	3.5599e-07	*
2	47402407	47402982	63197	3.59458e-07	*
9	46838106	46840724	135313	3.59615e-07	*
13	47376104	47378280	25565	3.59972e-07	*
7	68298385	68300489	124128	3.60171e-07	*
21	20617951	20619189	72477	3.60171e-07	*
7	33005851	33007274	120474	3.60171e-07	*
4	15330052	15331142	101126	3.61166e-07	*
21	8512530	8513420	71205	3.6238e-07	*
19	47827271	47827890	58396	3.63271e-07	*
23	27144762	27146563	81735	3.63536e-07	*
23	7650253	7651590	79759	3.63536e-07	*
24	19541110	19542580	86154	3.69517e-07	*
20	20497778	20500817	66078	3.69517e-07	*
20	21672369	21673378	66256	3.69517e-07	*
3	5868845	5870136	92695	3.72736e-07	*
5	13276946	13277780	104316	3.73393e-07	*
13	5761816	5762930	21101	3.73498e-07	*
6	989853	990872	110852	3.73944e-07	*
3	41818536	41819724	96925	3.74785e-07	*
15	14511022	14511815	32557	3.76298e-07	*
19	25834368	25835229	55893	3.76995e-07	*
23	22943447	22944252	81130	3.81281e-07	*
20	17734368	17734878	65819	3.85028e-07	*
10	43458331	43458970	10098	3.86555e-07	*
1	7768269	7768914	929	3.8671e-07	*
5	24446081	24447786	105694	3.86996e-07	*
12	22292005	22293069	17289	3.86996e-07	*
11	18984785	18987218	12289	3.8944e-07	*
12	7702564	7704168	16271	3.92666e-07	*
5	68442877	68444253	110151	3.93402e-07	*
4	12809309	12810960	100712	3.94624e-07	*
16	46231978	46232293	41308	3.94984e-07	*
10	37110006	37111573	9460	3.98515e-07	*
15	2298896	2299593	31656	3.98838e-07	*
20	21058140	21059552	66168	3.9952e-07	*
24	35491721	35492638	87809	4.01375e-07	*
13	46618747	46619841	25487	4.11632e-07	*
3	51036529	51037696	97570	4.13154e-07	*
1	7542308	7542813	886	4.15328e-07	*
14	31950778	31951620	29125	4.15491e-07	*
18	40244595	40245586	51911	4.20321e-07	*
15	46427956	46428751	36196	4.23646e-07	*
14	31113322	31115110	29002	4.24135e-07	*
13	5535083	5538547	21065	4.27668e-07	*
16	35456852	35458180	40103	4.2992e-07	*
22	35927496	35928752	78394	4.30771e-07	*
17	32837174	32838214	45692	4.34906e-07	*
19	22497808	22500044	55609	4.35051e-07	*
14	8370384	8371228	27193	4.36802e-07	*
17	36222323	36223202	46097	4.37186e-07	*
13	30505944	30507245	23716	4.38379e-07	*
9	7790933	7791751	131269	4.38406e-07	*
1	24043808	24044475	2279	4.43553e-07	*
7	40488803	40491932	121618	4.43989e-07	*
13	35173384	35173963	24338	4.49834e-07	*
20	20456107	20456420	66065	4.52587e-07	*
11	23467822	23468801	12775	4.54546e-07	*
6	14138469	14139851	112238	4.56245e-07	*
7	12128835	12130000	117735	4.65251e-07	*
1	21697667	21698770	2070	4.65251e-07	*
4	5658428	5659959	99682	4.67104e-07	*
25	2414506	2415966	89032	4.71424e-07	*
18	12147222	12148994	49005	4.76447e-07	*
20	11177657	11178652	65440	4.8212e-07	*
8	9314274	9314874	125834	4.86728e-07	*
7	16829643	16830675	118247	4.89838e-07	*
16	19392745	19393714	38289	4.94466e-07	*
20	17745728	17747254	65821	4.94556e-07	*
14	8022182	8022881	27154	4.95449e-07	*
11	16424373	16425861	12059	4.96393e-07	*
16	53930149	53931193	42055	4.98927e-07	*
5	17349730	17350818	104829	5.00012e-07	*
5	48136906	48138485	108316	5.00177e-07	*
20	33427992	33429182	67844	5.07082e-07	*
8	32616526	32617533	128523	5.09797e-07	*
23	17736570	17737550	80535	5.19946e-07	*
5	17331835	17332374	104824	5.2191e-07	*
17	1794794	1796313	42511	5.22797e-07	*
5	42016515	42018090	107819	5.28055e-07	*
19	6199932	6201908	54132	5.28679e-07	*
2	9186949	9187491	59474	5.2956e-07	*
9	41861545	41862623	134727	5.32511e-07	*
19	41981735	41982555	57693	5.34849e-07	*
12	27793812	27795232	18033	5.3748e-07	*
13	7920605	7921334	21313	5.3748e-07	*
1	36128616	36129689	3199	5.38237e-07	*
5	25520340	25520848	105844	5.39249e-07	*
11	6104659	6106887	11226	5.40934e-07	*
6	24432596	24433714	112959	5.49765e-07	*
12	37267246	37268401	19148	5.52261e-07	*
1	31896098	31897004	2916	5.54857e-07	*
16	44857050	44859607	41176	5.58383e-07	*
1	17440261	17441529	1697	5.72983e-07	*
14	35153181	35155355	29609	5.7305e-07	*
13	11301285	11302730	21665	5.7305e-07	*
2	7892677	7893981	59384	5.80926e-07	*
23	152256	157251	78864	5.83166e-07	*
23	28209736	28210542	81903	5.91072e-07	*
10	27296230	27297303	8341	5.96558e-07	*
4	24028841	24032212	102201	5.97849e-07	*
16	7795431	7796474	37408	6.00498e-07	*
21	24123210	24124366	72860	6.00498e-07	*
25	35502255	35503274	92031	6.01188e-07	*
8	52159408	52160600	130011	6.02665e-07	*
23	15378514	15379236	80366	6.09452e-07	*
23	23279909	23280719	81209	6.11357e-07	*
23	22796306	22797500	81086	6.14546e-07	*
14	35058208	35059179	29580	6.16267e-07	*
15	7186301	7187531	32092	6.16267e-07	*
10	35416383	35417777	9268	6.21646e-07	*
3	1298222	1300708	92454	6.30041e-07	*
5	24196504	24198900	105636	6.31465e-07	*
22	13042775	13043777	76334	6.3482e-07	*
7	56272262	56273066	123315	6.3737e-07	*
14	40269986	40271059	30215	6.37745e-07	*
12	27559602	27560769	18009	6.38513e-07	*
19	18859561	18864194	55233	6.40398e-07	*
7	36974724	36975705	121137	6.45324e-07	*
21	6343846	6344668	70935	6.46054e-07	*
9	13889850	13890568	131857	6.50692e-07	*
17	37765306	37766861	46233	6.52066e-07	*
9	34052570	34053947	134012	6.60842e-07	*
12	25585575	25586644	17685	6.63819e-07	*
17	32852713	32853467	45697	6.63819e-07	*
KN149932.1	46285	47397	136652	6.66238e-07	*
16	29260530	29261410	39340	6.67461e-07	*
9	37253203	37253835	134309	6.69265e-07	*
10	27412070	27412647	8367	6.69265e-07	*
14	24920207	24921335	28360	6.69265e-07	*
5	48982192	48983146	108445	6.69842e-07	*
KN150342.1	62131	64720	137412	6.70833e-07	*
9	22987756	22989200	132717	6.80093e-07	*
7	42444119	42444843	121851	6.80702e-07	*
23	46074964	46075586	84116	6.90937e-07	*
8	3076841	3081484	125200	6.965e-07	*
22	35674813	35675301	78357	6.98111e-07	*
11	37762777	37764255	14415	7.06369e-07	*
14	31986783	31988735	29132	7.23487e-07	*
23	23366077	23367503	81228	7.25266e-07	*
22	4998457	4999495	75517	7.27882e-07	*
19	6322104	6322806	54158	7.29485e-07	*
6	36671175	36671831	114306	7.35291e-07	*
1	26161661	26163319	2494	7.36784e-07	*
2	39696762	39698108	62293	7.37611e-07	*
10	33618585	33620189	9104	7.38679e-07	*
22	18993098	18993959	77044	7.39599e-07	*
5	43571614	43572684	107932	7.40398e-07	*
13	42124012	42124834	25023	7.4424e-07	*
4	17088662	17089695	101413	7.4825e-07	*
6	53349368	53350564	116066	7.48925e-07	*
22	18629171	18630121	76982	7.53769e-07	*
13	39475686	39476912	24800	7.55731e-07	*
20	49036353	49037072	69448	7.59593e-07	*
8	17843018	17844176	126795	7.61582e-07	*
7	53807016	53807886	122952	7.62399e-07	*
10	4152854	4154429	6383	7.68168e-07	*
4	15356632	15357668	101132	7.68168e-07	*
4	12618577	12621494	100672	7.70428e-07	*
KN150342.1	58769	61035	137411	7.76878e-07	*
14	45099470	45100118	30653	7.76895e-07	*
13	13140228	13141164	21812	7.77887e-07	*
20	24068897	24069423	66605	7.78222e-07	*
12	35887301	35888192	18970	7.81384e-07	*
5	36836914	36838381	107206	7.84323e-07	*
16	29046835	29048509	39287	7.8594e-07	*
18	44204808	44205346	52313	7.87748e-07	*
6	30424868	30426667	113617	7.92552e-07	*
14	26674898	26675568	28561	7.96152e-07	*
9	53101653	53103705	135882	7.99737e-07	*
9	41886087	41887066	134736	8.05047e-07	*
11	26803171	26803761	13288	8.12747e-07	*
15	29020397	29022310	34245	8.27734e-07	*
5	49379695	49381349	108495	8.27734e-07	*
17	34218550	34220062	45846	8.31418e-07	*
9	14466999	14468056	131927	8.40753e-07	*
3	33097706	33098861	95937	8.43222e-07	*
9	37202431	37204227	134294	8.67038e-07	*
15	10267510	10268224	32351	8.6768e-07	*
17	37944521	37945333	46279	8.71758e-07	*
20	17756500	17757204	65825	8.75823e-07	*
19	14281386	14281965	54914	8.76507e-07	*
13	6107139	6108244	21168	8.77859e-07	*
4	9921369	9922045	100330	8.80321e-07	*
6	33505966	33507463	114012	8.83491e-07	*
1	35697667	35699118	3131	8.83491e-07	*
25	24290704	24292214	91141	8.84595e-07	*
18	48301886	48302821	52802	8.87351e-07	*
8	19707340	19707879	127046	8.90812e-07	*
19	41681422	41684167	57661	8.92236e-07	*
19	23226725	23227862	55666	8.96444e-07	*
9	50270658	50271345	135621	8.97051e-07	*
7	36972539	36973233	121136	8.97489e-07	*
19	1175757	1176442	53476	9.03216e-07	*
7	18582326	18584744	118446	9.09494e-07	*
16	33339884	33341335	39833	9.098e-07	*
15	3629604	3630634	31818	9.26695e-07	*
21	10689482	10690906	71372	9.38262e-07	*
9	31240859	31241714	133644	9.56084e-07	*
17	44348903	44350532	46829	9.5753e-07	*
23	22823376	22824102	81095	9.6575e-07	*
25	11315892	11317080	89908	9.75676e-07	*
17	56420	56976	42278	9.75885e-07	*
25	25453004	25453672	91196	9.80297e-07	*
21	9532981	9533824	71227	9.80297e-07	*
7	14347466	14349373	117977	9.84295e-07	*
1	45725764	45727068	4194	9.84295e-07	*
7	65824135	65824883	123909	9.88251e-07	*
13	43263628	43264353	25126	9.93998e-07	*
24	37967938	37969112	88086	9.9497e-07	*
23	37020986	37021668	83154	9.95031e-07	*
3	34189262	34190337	96074	1.01346e-06	*
15	16279693	16284090	32733	1.01716e-06	*
18	5653655	5654902	48278	1.02104e-06	*
5	64609105	64609833	109770	1.02266e-06	*
KN150617.1	63919	65311	137860	1.03205e-06	*
9	52758996	52760492	135854	1.04786e-06	*
20	6709503	6710719	65124	1.0488e-06	*
13	13503888	13505174	21862	1.0528e-06	*
6	14441761	14443374	112267	1.05711e-06	*
19	25859768	25860807	55900	1.05796e-06	*
24	27543932	27544627	87074	1.05796e-06	*
12	31681830	31682891	18445	1.06267e-06	*
18	24088828	24090502	50591	1.07065e-06	*
5	186380	188768	103148	1.08351e-06	*
20	15187972	15188748	65643	1.08401e-06	*
5	36610392	36616965	107166	1.08628e-06	*
11	23748512	23749222	12825	1.08855e-06	*
14	5783011	5783504	26900	1.09086e-06	*
20	19546206	19546636	65995	1.09086e-06	*
8	23303536	23304782	127474	1.09478e-06	*
6	44263029	44264118	115112	1.09486e-06	*
18	20140208	20143456	50006	1.1201e-06	*
21	34600009	34601480	73733	1.12131e-06	*
23	2043516	2045184	79102	1.12321e-06	*
17	17650142	17650659	43919	1.13387e-06	*
4	74836366	74837029	102878	1.13387e-06	*
13	2979819	2980696	20659	1.13839e-06	*
20	17754935	17755679	65824	1.14896e-06	*
5	1394367	1395789	103298	1.14972e-06	*
10	10877021	10877791	6954	1.14972e-06	*
15	24658309	24660142	33611	1.15259e-06	*
24	21384404	21385101	86369	1.15276e-06	*
24	17172337	17173280	85984	1.15631e-06	*
22	32427043	32427983	78120	1.15639e-06	*
8	43622368	43623785	129276	1.15771e-06	*
17	7188690	7189601	42884	1.15845e-06	*
9	54797270	54799118	136036	1.16335e-06	*
7	46685376	46690089	122241	1.17008e-06	*
3	28676654	28678021	95390	1.17663e-06	*
13	17530312	17532143	22233	1.18577e-06	*
10	4645005	4646442	6419	1.19245e-06	*
19	31832394	31833244	56607	1.19427e-06	*
9	37156107	37157021	134278	1.19648e-06	*
2	22274616	22275548	60429	1.1999e-06	*
7	53281242	53283051	122873	1.20921e-06	*
6	14057346	14058110	112234	1.20923e-06	*
5	32963593	32964309	106742	1.20931e-06	*
7	40452466	40453526	121609	1.21577e-06	*
20	40301021	40302245	68635	1.21854e-06	*
5	7696369	7696876	103899	1.2216e-06	*
21	3431750	3434269	70547	1.22315e-06	*
2	22098721	22100757	60409	1.2283e-06	*
6	36476003	36476992	114259	1.23875e-06	*
1	22677228	22678669	2135	1.24043e-06	*
25	28144768	28145232	91294	1.24043e-06	*
23	32787700	32788572	82547	1.24626e-06	*
8	20110669	20111661	127120	1.24633e-06	*
23	23123916	23124469	81181	1.24966e-06	*
22	23307835	23309224	77557	1.26043e-06	*
15	27216367	27217080	33934	1.26043e-06	*
20	19337780	19338465	65972	1.26688e-06	*
15	3570305	3571440	31806	1.2676e-06	*
24	30348547	30351434	87336	1.27136e-06	*
7	17061996	17062893	118294	1.28493e-06	*
15	8277940	8279560	32149	1.28843e-06	*
22	33172421	33173699	78201	1.28992e-06	*
19	41553292	41554023	57634	1.29312e-06	*
1	9281825	9284430	1058	1.29431e-06	*
8	28508934	28509634	128087	1.2954e-06	*
7	21140983	21141911	118766	1.29658e-06	*
7	46310204	46312595	122168	1.30443e-06	*
13	24622833	24623996	22912	1.30608e-06	*
7	53781540	53783005	122947	1.30608e-06	*
KN149973.1	6483	7441	136746	1.31391e-06	*
9	14439394	14439932	131920	1.3414e-06	*
2	40286575	40287467	62401	1.35148e-06	*
15	27228133	27228911	33937	1.35202e-06	*
9	3416725	3417527	130864	1.35811e-06	*
7	34753096	34754610	120774	1.36247e-06	*
25	2785217	2786076	89096	1.36719e-06	*
5	49520252	49521698	108517	1.36811e-06	*
16	42345694	42346796	40915	1.37458e-06	*
11	24188371	24189701	12899	1.37547e-06	*
20	21197647	21198182	66188	1.37601e-06	*
15	36777482	36778123	35215	1.38673e-06	*
14	31142000	31143665	29012	1.39177e-06	*
10	29311979	29313326	8648	1.39438e-06	*
25	31616316	31617083	91588	1.40492e-06	*
12	34683245	34684096	18801	1.4059e-06	*
19	13209604	13210727	54809	1.42606e-06	*
2	57049650	57051271	64078	1.42642e-06	*
18	44134288	44135603	52292	1.42938e-06	*
21	23573673	23574530	72791	1.43486e-06	*
3	41885039	41886365	96938	1.43814e-06	*
6	30804991	30806446	113656	1.43828e-06	*
7	49767678	49768643	122549	1.44847e-06	*
1	47224998	47226419	4436	1.44971e-06	*
KN149774.1	7701	8909	136388	1.455e-06	*
15	10442299	10443052	32369	1.46251e-06	*
11	26351707	26352813	13222	1.47348e-06	*
7	16388115	16388620	118187	1.48472e-06	*
9	36980671	36981458	134245	1.4871e-06	*
22	19567248	19568088	77074	1.4871e-06	*
17	35779807	35780904	46034	1.48725e-06	*
19	1152248	1152591	53471	1.49229e-06	*
23	23298430	23299724	81212	1.50597e-06	*
11	42056366	42058404	14903	1.53881e-06	*
22	16963853	16964336	76754	1.53881e-06	*
13	5330685	5331693	21011	1.53881e-06	*
8	39624253	39625789	128987	1.5415e-06	*
21	19135073	19136222	72281	1.57347e-06	*
23	15598978	15599931	80390	1.57422e-06	*
7	26132258	26134838	119449	1.58713e-06	*
14	26677760	26678880	28562	1.59623e-06	*
24	14002751	14003964	85757	1.60093e-06	*
23	1963952	1964971	79089	1.60205e-06	*
19	40941276	40941833	57541	1.60205e-06	*
16	32376141	32377474	39690	1.61367e-06	*
18	1551963	1553548	47883	1.61733e-06	*
11	31343798	31344223	13755	1.62466e-06	*
8	46935700	46936749	129482	1.6339e-06	*
22	30168467	30169290	77953	1.63722e-06	*
7	35877682	35878521	120961	1.63726e-06	*
20	51525758	51526169	69627	1.63864e-06	*
19	15837337	15838602	55048	1.63934e-06	*
20	3560777	3561464	64864	1.65146e-06	*
18	22608243	22608767	50319	1.65686e-06	*
11	25807096	25810946	13145	1.65828e-06	*
7	36242880	36243862	121038	1.65828e-06	*
15	6319419	6320189	32021	1.6637e-06	*
20	4914846	4916274	64997	1.66886e-06	*
9	28379310	28380716	133296	1.67336e-06	*
15	36792286	36793598	35218	1.67336e-06	*
9	8008036	8008499	131294	1.6766e-06	*
6	36702669	36704058	114313	1.67875e-06	*
20	32455111	32456491	67715	1.68597e-06	*
5	58976029	58976962	109295	1.68912e-06	*
5	7658388	7658850	103894	1.70304e-06	*
6	2351158	2351973	111034	1.70491e-06	*
23	5081211	5081947	79473	1.70889e-06	*
2	40128909	40131865	62382	1.71366e-06	*
3	28598919	28599700	95373	1.71899e-06	*
17	35767127	35767682	46030	1.73905e-06	*
18	40353892	40358182	51929	1.74199e-06	*
5	1813538	1813879	103350	1.74199e-06	*
8	8105344	8107380	125687	1.7424e-06	*
9	14905495	14906654	132010	1.75635e-06	*
7	48638909	48639684	122434	1.75982e-06	*
11	26322030	26322848	13215	1.76148e-06	*
23	21384380	21385798	80914	1.7686e-06	*
15	1397159	1398191	31559	1.77163e-06	*
23	27142235	27143742	81734	1.77474e-06	*
21	17842486	17843466	72146	1.77474e-06	*
18	6093493	6095462	48333	1.77709e-06	*
6	54015324	54015800	116137	1.80921e-06	*
12	42445981	42447059	19506	1.81276e-06	*
8	39557583	39560262	128981	1.82074e-06	*
9	1874448	1875082	130625	1.82144e-06	*
1	22834528	22836411	2146	1.82719e-06	*
8	28597474	28598049	128108	1.82762e-06	*
18	17939811	17940734	49707	1.83278e-06	*
18	25961485	25961962	50822	1.84034e-06	*
1	6505959	6506966	814	1.84034e-06	*
13	30771107	30771499	23766	1.8492e-06	*
15	1516605	1517223	31572	1.85899e-06	*
15	28713523	28714481	34198	1.85899e-06	*
1	27174016	27176004	2621	1.86163e-06	*
7	48631938	48633072	122433	1.86343e-06	*
8	7706672	7707333	125615	1.86452e-06	*
15	21393099	21394021	33225	1.87703e-06	*
7	52605721	52606578	122828	1.87703e-06	*
25	7872922	7874500	89679	1.8775e-06	*
20	21519989	21520992	66243	1.88561e-06	*
6	45907225	45907830	115266	1.88921e-06	*
20	14734985	14735570	65580	1.9008e-06	*
18	30294694	30296162	51133	1.90488e-06	*
24	26881969	26882665	86999	1.90596e-06	*
10	43879261	43879973	10193	1.90864e-06	*
19	35107090	35109019	57049	1.92118e-06	*
7	40470127	40471518	121616	1.92457e-06	*
3	41942430	41943889	96951	1.93264e-06	*
18	44218025	44219094	52319	1.94043e-06	*
8	15166406	15167593	126438	1.94045e-06	*
17	44359508	44360628	46831	1.96896e-06	*
24	21292582	21293676	86352	1.96994e-06	*
7	29870330	29871222	119980	1.97335e-06	*
5	52274712	52275907	108835	1.97524e-06	*
25	8539228	8539756	89718	1.97646e-06	*
13	6047661	6049331	21154	1.98492e-06	*
20	22826495	22827019	66396	2.00507e-06	*
7	55923969	55924448	123254	2.0062e-06	*
1	30680118	30681335	2819	2.00724e-06	*
1	13302767	13304145	1378	2.00724e-06	*
3	10265107	10266549	93045	2.00892e-06	*
15	16262919	16264075	32726	2.00892e-06	*
23	23622219	23623980	81288	2.01008e-06	*
13	44497985	44498738	25216	2.0195e-06	*
9	23332951	23333971	132793	2.02518e-06	*
1	3058313	3059033	435	2.02701e-06	*
20	24013927	24014937	66588	2.03048e-06	*
6	55950847	55951818	116353	2.04565e-06	*
21	37212051	37213122	73928	2.04565e-06	*
5	58904723	58906279	109278	2.04782e-06	*
5	65760875	65761813	109869	2.0524e-06	*
16	49468427	49469104	41586	2.05424e-06	*
16	32690013	32690565	39743	2.05482e-06	*
9	3204121	3204660	130821	2.05839e-06	*
5	22028441	22029490	105386	2.0587e-06	*
3	23171376	23172625	94589	2.09386e-06	*
20	33327292	33327998	67813	2.09386e-06	*
18	15317340	15318036	49359	2.09443e-06	*
7	53308931	53310089	122877	2.09594e-06	*
6	27565346	27565765	113325	2.09988e-06	*
5	18517239	18518126	104979	2.10711e-06	*
6	26753299	26754391	113230	2.1079e-06	*
2	49068583	49069079	63386	2.11053e-06	*
13	17155004	17155898	22162	2.1176e-06	*
25	31323644	31324298	91551	2.11959e-06	*
13	39251526	39252040	24783	2.12361e-06	*
9	13187058	13187786	131776	2.12882e-06	*
2	32550979	32551574	61553	2.12882e-06	*
18	44075060	44075829	52277	2.16048e-06	*
23	23455038	23456014	81250	2.19143e-06	*
22	29855259	29855850	77924	2.19143e-06	*
2	29988237	29990139	61239	2.19242e-06	*
9	18793431	18794351	132325	2.20208e-06	*
5	28668342	28669028	106179	2.22212e-06	*
17	44267452	44268572	46819	2.22221e-06	*
6	31814406	31815553	113782	2.2294e-06	*
13	22598584	22599604	22701	2.24927e-06	*
12	31672487	31677147	18443	2.25354e-06	*
17	29898521	29899789	45387	2.25484e-06	*
12	1846872	1847914	15767	2.26209e-06	*
23	32804853	32805765	82552	2.26269e-06	*
3	12185283	12187225	93196	2.2713e-06	*
25	24747971	24748834	91170	2.27616e-06	*
3	57205728	57206464	98138	2.28321e-06	*
12	16346751	16347453	16852	2.28725e-06	*
21	28878722	28879319	73309	2.30487e-06	*
23	25697843	25698322	81567	2.3241e-06	*
3	53035632	53037506	97682	2.32749e-06	*
19	45641561	45642361	58086	2.33405e-06	*
8	44339206	44339918	129339	2.34709e-06	*
9	54788688	54789892	136034	2.34709e-06	*
KN149815.1	20684	21867	136473	2.35778e-06	*
22	32481350	32482114	78134	2.37211e-06	*
20	21660795	21661294	66254	2.37228e-06	*
7	53795516	53796205	122949	2.3799e-06	*
3	24146813	24148562	94825	2.38483e-06	*
1	38093467	38094784	3362	2.3933e-06	*
25	422456	424048	88735	2.3933e-06	*
21	7434319	7435196	71067	2.39452e-06	*
17	48387261	48387741	47062	2.39932e-06	*
19	16411577	16412056	55111	2.43508e-06	*
7	28542631	28543846	119825	2.44411e-06	*
22	37284404	37285218	78590	2.44411e-06	*
25	853047	853639	88809	2.45188e-06	*
20	45537399	45538016	69057	2.456e-06	*
19	15979832	15980563	55079	2.46371e-06	*
20	30841664	30843077	67487	2.46508e-06	*
13	17099867	17100524	22149	2.47287e-06	*
14	25955542	25956991	28460	2.47293e-06	*
16	1433192	1433941	36761	2.48333e-06	*
5	15674231	15675442	104640	2.49669e-06	*
7	68240514	68241168	124116	2.5124e-06	*
23	36472739	36474882	83093	2.52157e-06	*
16	16712096	16714956	38134	2.52204e-06	*
22	19601927	19603077	77081	2.53443e-06	*
KN150232.1	50394	50831	137288	2.53443e-06	*
17	11022550	11023103	43280	2.53443e-06	*
20	48516626	48517471	69379	2.54353e-06	*
13	25092488	25093218	22987	2.55487e-06	*
18	24082923	24083963	50589	2.57321e-06	*
15	41835283	41836168	35771	2.57707e-06	*
24	21256415	21257517	86341	2.60366e-06	*
8	39552720	39553689	128979	2.60666e-06	*
5	46433352	46434370	108248	2.61267e-06	*
4	22572065	22572550	102079	2.61943e-06	*
12	37108049	37108802	19115	2.63372e-06	*
5	49510185	49510920	108515	2.64083e-06	*
13	6082699	6085122	21165	2.6474e-06	*
7	55129266	55130238	123149	2.67756e-06	*
23	28357461	28360718	81941	2.68381e-06	*
20	29389063	29389905	67285	2.68381e-06	*
14	5161729	5163002	26808	2.69048e-06	*
1	663239	664320	172	2.69847e-06	*
7	35755508	35755989	120934	2.7082e-06	*
1	41501717	41503381	3822	2.70864e-06	*
11	42066749	42068900	14907	2.71649e-06	*
15	4480899	4483154	31921	2.72592e-06	*
23	19679	20556	78826	2.73841e-06	*
5	6605515	6606185	103787	2.74478e-06	*
15	28291596	28292182	34120	2.77782e-06	*
9	23343720	23344815	132794	2.77919e-06	*
7	48656291	48656832	122437	2.78038e-06	*
1	5268468	5269231	604	2.79112e-06	*
8	15129361	15129907	126430	2.79496e-06	*
7	40457116	40458938	121612	2.80732e-06	*
16	7140001	7140745	37317	2.80732e-06	*
7	31243524	31244664	120211	2.81308e-06	*
25	426682	429288	88736	2.8375e-06	*
21	19825282	19826205	72354	2.85856e-06	*
5	67420086	67420542	110034	2.85928e-06	*
17	46244045	46245262	47007	2.85928e-06	*
KN150284.1	9621	10193	137324	2.85928e-06	*
10	42628256	42630190	10024	2.85928e-06	*
7	41243823	41245127	121729	2.85928e-06	*
23	31502177	31502551	82339	2.88663e-06	*
24	6625667	6626742	85133	2.91094e-06	*
14	32739577	32741217	29247	2.91284e-06	*
6	6596056	6597034	111489	2.91302e-06	*
5	58953748	58954196	109290	2.91626e-06	*
23	32198672	32199852	82464	2.94374e-06	*
2	39683102	39684405	62290	2.95255e-06	*
4	14399209	14400251	100954	2.9643e-06	*
2	42629898	42631169	62667	2.98028e-06	*
21	23729377	23729932	72814	2.98563e-06	*
17	11117762	11118387	43303	2.98563e-06	*
23	20216708	20217250	80795	3.01328e-06	*
5	71793085	71793465	110463	3.01737e-06	*
11	23404139	23404809	12764	3.0449e-06	*
18	44258216	44258833	52327	3.04827e-06	*
10	27130318	27131666	8294	3.05703e-06	*
1	13356517	13358323	1390	3.06284e-06	*
19	15755395	15756136	55035	3.09104e-06	*
8	12782316	12782790	126195	3.09181e-06	*
16	8496775	8497338	37485	3.09181e-06	*
18	20173499	20174226	50013	3.10562e-06	*
10	1363996	1364668	6100	3.10784e-06	*
5	54624189	54625502	108948	3.10924e-06	*
19	15447948	15448832	54997	3.11993e-06	*
10	15397977	15398588	7287	3.12127e-06	*
16	46243801	46244663	41313	3.13337e-06	*
19	41560294	41561542	57637	3.13957e-06	*
23	10117040	10117507	79974	3.14801e-06	*
8	19318396	19319658	126965	3.16969e-06	*
17	23400106	23400669	44545	3.19353e-06	*
1	27042358	27042996	2583	3.19708e-06	*
16	5519020	5520154	37125	3.22301e-06	*
7	54536425	54538774	123030	3.23693e-06	*
14	50770229	50771661	31153	3.24376e-06	*
13	10600323	10602008	21581	3.24376e-06	*
2	34026794	34027440	61781	3.25004e-06	*
18	34146171	34147285	51332	3.25363e-06	*
20	19550479	19551250	65996	3.25547e-06	*
13	26698417	26700041	23222	3.26736e-06	*
20	39673483	39674220	68557	3.26922e-06	*
5	48216389	48216787	108341	3.2767e-06	*
4	22504117	22504469	102063	3.28693e-06	*
4	17005270	17008735	101382	3.2887e-06	*
23	9293909	9294449	79877	3.2887e-06	*
10	34287304	34288043	9131	3.28886e-06	*
23	23355614	23357279	81225	3.30809e-06	*
25	23797012	23797718	91099	3.31881e-06	*
KN150567.1	27577	28456	137752	3.32418e-06	*
5	7613162	7614192	103882	3.32658e-06	*
23	21951224	21951799	80971	3.32695e-06	*
24	35456351	35456827	87802	3.33309e-06	*
11	43532498	43532920	15100	3.34752e-06	*
16	32931089	32931787	39769	3.35429e-06	*
16	21095264	21096388	38498	3.36742e-06	*
12	8388849	8389589	16325	3.36742e-06	*
7	21650120	21651023	118824	3.37028e-06	*
1	42457924	42458749	3920	3.38184e-06	*
9	21698092	21699257	132601	3.38711e-06	*
9	22902741	22904286	132707	3.39812e-06	*
17	24492614	24493501	44709	3.41554e-06	*
1	39552104	39555094	3571	3.42149e-06	*
18	44272499	44273762	52331	3.43045e-06	*
20	15465551	15466643	65681	3.43209e-06	*
21	34603611	34606034	73735	3.43707e-06	*
4	20877748	20878292	101882	3.43789e-06	*
22	35995877	35997151	78413	3.44464e-06	*
11	84433	88234	10454	3.46e-06	*
7	33624465	33626040	120584	3.46046e-06	*
7	21000435	21001676	118729	3.4758e-06	*
9	26056106	26056673	133058	3.49701e-06	*
9	53232013	53232772	135897	3.5082e-06	*
13	32746765	32748207	24039	3.51698e-06	*
21	23744144	23747314	72819	3.53216e-06	*
15	18129655	18131301	32901	3.53262e-06	*
2	40107160	40108699	62376	3.5752e-06	*
14	479548	481982	26285	3.58948e-06	*
20	20450802	20452615	66064	3.59131e-06	*
13	28554005	28556999	23445	3.60029e-06	*
23	27155260	27155775	81740	3.6144e-06	*
19	15464862	15465884	55002	3.63395e-06	*
7	31079664	31080570	120195	3.65806e-06	*
17	35930059	35930563	46063	3.65806e-06	*
22	11230443	11231366	76059	3.66621e-06	*
5	51987520	51989756	108779	3.67224e-06	*
18	46644924	46646135	52596	3.67941e-06	*
17	17380194	17380773	43897	3.68015e-06	*
18	23542558	23543306	50467	3.69379e-06	*
23	6417208	6418258	79624	3.69379e-06	*
2	30635400	30636599	61319	3.69462e-06	*
6	43091514	43092726	114925	3.70361e-06	*
9	46428341	46430192	135283	3.70361e-06	*
22	37328767	37330212	78601	3.72989e-06	*
23	25172046	25174246	81507	3.7344e-06	*
5	24369597	24371615	105676	3.75215e-06	*
19	25750255	25751179	55871	3.7776e-06	*
5	45363259	45363830	108174	3.7776e-06	*
10	38905802	38907479	9685	3.81423e-06	*
21	6466277	6467028	70955	3.83746e-06	*
24	2607171	2608019	84559	3.84935e-06	*
14	49658413	49659270	31097	3.85069e-06	*
11	35796798	35798246	14225	3.8548e-06	*
15	4520355	4521342	31930	3.86686e-06	*
11	37772615	37773256	14418	3.89627e-06	*
18	20097335	20098037	49996	3.92284e-06	*
23	20894653	20895367	80876	3.92811e-06	*
22	36281374	36282464	78465	3.93008e-06	*
13	10198073	10199242	21508	3.95412e-06	*
11	30128132	30129013	13628	3.95826e-06	*
11	28254947	28255667	13451	3.96699e-06	*
2	44111258	44112171	62846	3.96699e-06	*
25	1943315	1945348	88963	3.9738e-06	*
24	41707200	41709759	88539	3.99685e-06	*
24	23818338	23819395	86644	3.99987e-06	*
2	21896160	21897269	60378	4.00116e-06	*
2	16307268	16308048	59891	4.01586e-06	*
15	36984103	36986841	35262	4.01795e-06	*
13	30339330	30340168	23673	4.01969e-06	*
18	554427	555520	47773	4.02978e-06	*
10	31141651	31142313	8748	4.02978e-06	*
9	9814810	9815723	131494	4.03632e-06	*
KN150068.1	26942	27709	136935	4.04261e-06	*
4	11026433	11026919	100460	4.04611e-06	*
5	44889198	44889698	108113	4.04722e-06	*
18	23748087	23749354	50513	4.06596e-06	*
24	25114384	25114927	86821	4.08873e-06	*
18	25937324	25938401	50818	4.09183e-06	*
19	33730805	33732484	56887	4.09825e-06	*
13	30323000	30324205	23669	4.10249e-06	*
7	43808868	43811082	121961	4.11295e-06	*
11	39359762	39360567	14574	4.11485e-06	*
9	27216370	27216808	133190	4.125e-06	*
24	19790344	19791656	86192	4.14175e-06	*
1	42777809	42779816	3962	4.14611e-06	*
19	15440879	15444897	54995	4.15142e-06	*
23	28341886	28343477	81934	4.16217e-06	*
9	42711594	42712403	134828	4.16217e-06	*
5	36677140	36677975	107179	4.17069e-06	*
7	34876899	34878375	120797	4.17269e-06	*
18	15353155	15354144	49367	4.21658e-06	*
1	49222509	49222934	4594	4.23632e-06	*
6	34854619	34855650	114157	4.24756e-06	*
5	24436499	24438795	105692	4.24854e-06	*
16	11038646	11040152	37705	4.25105e-06	*
15	24653673	24654838	33609	4.25105e-06	*
19	30204484	30205037	56374	4.25341e-06	*
2	28484797	28485273	61095	4.26323e-06	*
10	7351828	7352361	6624	4.30086e-06	*
5	39723788	39726099	107534	4.30443e-06	*
19	29048091	29049223	56243	4.32045e-06	*
22	33174960	33176053	78203	4.33244e-06	*
22	35917079	35918302	78393	4.35858e-06	*
25	36111288	36112396	92087	4.36875e-06	*
9	14637696	14638480	131968	4.38052e-06	*
8	48335718	48336597	129621	4.40605e-06	*
24	4345934	4347139	84775	4.43102e-06	*
1	53999921	54000543	5236	4.43643e-06	*
5	65763068	65763570	109870	4.44233e-06	*
9	8527807	8528214	131358	4.4846e-06	*
7	40430338	40430972	121605	4.4846e-06	*
14	31969422	31970479	29129	4.48555e-06	*
19	30836793	30838344	56466	4.48555e-06	*
9	16385078	16386209	132124	4.50261e-06	*
13	1958718	1959677	20577	4.50868e-06	*
3	34294965	34296011	96101	4.51025e-06	*
4	1712627	1713361	99108	4.53292e-06	*
22	35751374	35752589	78367	4.54064e-06	*
23	25638743	25639652	81558	4.54506e-06	*
5	19512216	19514291	105085	4.57624e-06	*
20	22621095	22621499	66375	4.58107e-06	*
16	50028898	50029448	41647	4.5811e-06	*
6	41709626	41710282	114773	4.58271e-06	*
12	45979236	45980086	19884	4.60672e-06	*
11	28339323	28342002	13472	4.61145e-06	*
17	29293686	29294639	45324	4.62591e-06	*
19	47280268	47280817	58309	4.62591e-06	*
11	31336931	31337875	13752	4.62734e-06	*
10	27209479	27213826	8317	4.62962e-06	*
12	34371535	34372072	18727	4.66478e-06	*
8	11690541	11691313	126103	4.7122e-06	*
11	23741506	23742518	12823	4.71637e-06	*
12	45905607	45906729	19877	4.71791e-06	*
3	34192960	34196295	96075	4.72717e-06	*
13	46631084	46631842	25488	4.7509e-06	*
25	31307690	31309100	91549	4.76188e-06	*
7	9781529	9782121	117533	4.77072e-06	*
2	1693649	1694828	58792	4.8023e-06	*
10	42597755	42599308	10019	4.80969e-06	*
2	4114189	4116273	59035	4.80975e-06	*
2	11775861	11777182	59673	4.82855e-06	*
3	53041810	53043120	97684	4.83151e-06	*
11	44785585	44786201	15335	4.83151e-06	*
4	11240442	11241634	100483	4.83686e-06	*
5	72350062	72350923	110606	4.84026e-06	*
3	34397685	34398875	96125	4.8675e-06	*
14	31212571	31213141	29027	4.86981e-06	*
KN150310.1	3137	3692	137356	4.88189e-06	*
23	38900512	38901292	83361	4.88236e-06	*
8	45853357	45853832	129413	4.88236e-06	*
18	37303696	37305957	51626	4.91443e-06	*
23	29059967	29061309	82031	4.9166e-06	*
5	55394943	55396129	109024	4.93734e-06	*
5	36339895	36341213	107128	4.94191e-06	*
19	29795541	29796923	56337	4.96427e-06	*
20	26399655	26400492	66861	4.97177e-06	*
15	7175330	7176943	32089	4.97177e-06	*
18	40524804	40525819	51958	4.98849e-06	*
5	65107392	65109115	109819	4.99795e-06	*
23	23657049	23659392	81296	5.00553e-06	*
19	45986900	45987926	58121	5.01001e-06	*
21	17815681	17816693	72138	5.01427e-06	*
9	39848844	39849831	134551	5.01427e-06	*
14	7638581	7639065	27101	5.02221e-06	*
19	2356716	2358509	53684	5.02278e-06	*
18	45196295	45196856	52430	5.02579e-06	*
18	26067900	26069440	50837	5.05131e-06	*
20	33443852	33444255	67848	5.07864e-06	*
9	27324214	27324980	133198	5.07864e-06	*
17	10451331	10452883	43199	5.07864e-06	*
7	37647784	37649508	121267	5.12091e-06	*
6	36501770	36502688	114267	5.17223e-06	*
2	32030702	32031359	61480	5.17897e-06	*
19	9464617	9465444	54501	5.19002e-06	*
23	25575046	25575572	81547	5.20141e-06	*
5	64285789	64287013	109738	5.20141e-06	*
9	50080153	50080613	135597	5.20182e-06	*
4	71961414	71962935	102737	5.20182e-06	*
23	7166363	7168703	79690	5.20182e-06	*
10	38384391	38385514	9621	5.20529e-06	*
23	23233505	23234841	81199	5.20651e-06	*
3	10244015	10244514	93040	5.21422e-06	*
12	44898539	44899359	19763	5.2197e-06	*
21	23548128	23549738	72786	5.22511e-06	*
16	31475601	31476090	39574	5.24461e-06	*
3	23182495	23183284	94591	5.24461e-06	*
13	46437735	46438285	25458	5.2616e-06	*
8	9453362	9454061	125852	5.27611e-06	*
2	11694178	11694935	59656	5.29766e-06	*
18	20400121	20401225	50072	5.31201e-06	*
7	21107488	21108712	118760	5.31867e-06	*
KN150414.1	4476	5011	137518	5.34718e-06	*
11	23498452	23499283	12785	5.3584e-06	*
10	42263804	42264729	9972	5.37531e-06	*
18	11105740	11106348	48888	5.39419e-06	*
15	20481423	20482286	33115	5.40998e-06	*
12	23505714	23506527	17413	5.4124e-06	*
22	22855213	22856348	77503	5.4158e-06	*
7	21268419	21269281	118783	5.42731e-06	*
7	20964637	20968579	118719	5.43452e-06	*
15	19566229	19566834	33003	5.45425e-06	*
8	20478236	20479047	127183	5.47271e-06	*
1	42786135	42786946	3963	5.48554e-06	*
19	33381670	33382358	56833	5.51162e-06	*
11	21969666	21970717	12623	5.52097e-06	*
22	23181437	23182152	77535	5.52485e-06	*
20	29959678	29960404	67361	5.57979e-06	*
16	23286659	23289473	38669	5.59424e-06	*
4	5739474	5739839	99700	5.62032e-06	*
19	41771785	41772435	57675	5.62259e-06	*
16	46241519	46242323	41312	5.62361e-06	*
11	21973997	21975534	12625	5.63682e-06	*
9	31015056	31015993	133602	5.64891e-06	*
5	13731950	13732235	104363	5.64891e-06	*
15	15536206	15537192	32637	5.64891e-06	*
6	57680969	57682473	116528	5.67938e-06	*
9	51186521	51187166	135705	5.67938e-06	*
17	31667775	31668958	45578	5.68385e-06	*
25	2638372	2639221	89075	5.69374e-06	*
9	13626158	13627109	131838	5.69374e-06	*
24	6542814	6543720	85115	5.70255e-06	*
25	14461506	14462720	90175	5.7158e-06	*
24	17313208	17313982	86021	5.75481e-06	*
13	18760118	18760944	22373	5.75809e-06	*
8	8152568	8153634	125697	5.7638e-06	*
18	43077623	43078736	52188	5.77252e-06	*
13	19689844	19690270	22455	5.77514e-06	*
23	22840324	22841702	81100	5.77959e-06	*
24	5104601	5106029	84959	5.84379e-06	*
13	7929335	7929931	21314	5.84652e-06	*
5	46680851	46682117	108261	5.84652e-06	*
4	19507733	19508419	101717	5.84892e-06	*
23	21450584	21453035	80925	5.849e-06	*
22	22926326	22927084	77512	5.85749e-06	*
8	50655763	50656842	129852	5.85957e-06	*
7	14350072	14351552	117978	5.85968e-06	*
13	23201140	23202256	22780	5.872e-06	*
16	51355984	51357572	41789	5.88052e-06	*
15	15352684	15353356	32613	5.88796e-06	*
23	32932827	32933651	82581	5.89382e-06	*
21	23660154	23661478	72809	5.89933e-06	*
16	35658196	35658887	40146	5.96057e-06	*
11	41272419	41273089	14788	5.96201e-06	*
10	10850036	10850936	6949	5.96629e-06	*
7	36268863	36270115	121046	5.96629e-06	*
11	28269452	28270534	13455	5.97965e-06	*
6	14879893	14883103	112332	6.0132e-06	*
3	53002461	53003781	97674	6.02136e-06	*
14	42049191	42049764	30398	6.03084e-06	*
2	18289624	18290143	60063	6.05049e-06	*
14	40223489	40224780	30206	6.10831e-06	*
15	19509566	19510553	33000	6.12332e-06	*
2	44185036	44186548	62853	6.12332e-06	*
22	18213205	18213667	76901	6.14122e-06	*
22	30290691	30291873	77975	6.14353e-06	*
6	55971698	55972133	116358	6.14533e-06	*
24	39089238	39090024	88216	6.19171e-06	*
22	12416841	12418412	76255	6.20732e-06	*
6	44032181	44032959	115055	6.20793e-06	*
8	3221123	3221756	125221	6.23578e-06	*
13	33761382	33763037	24157	6.23985e-06	*
8	43619965	43621273	129275	6.25031e-06	*
11	21616163	21617751	12545	6.2547e-06	*
12	42611717	42612447	19553	6.2547e-06	*
11	21980596	21982884	12628	6.29731e-06	*
19	26037111	26038256	55944	6.2978e-06	*
10	38214503	38215202	9583	6.30039e-06	*
23	20879963	20880636	80869	6.30948e-06	*
16	34098768	34099580	39966	6.32535e-06	*
16	2734975	2735743	36860	6.33184e-06	*
5	24373392	24374556	105677	6.37002e-06	*
23	23349950	23351052	81223	6.40588e-06	*
21	9575867	9576828	71236	6.40684e-06	*
9	30032314	30032693	133446	6.41101e-06	*
12	34557429	34558605	18760	6.41342e-06	*
16	19858242	19859057	38352	6.41434e-06	*
1	26629435	26629878	2541	6.41839e-06	*
8	29968870	29970657	128225	6.43712e-06	*
18	20493420	20494587	50088	6.4401e-06	*
7	34516624	34517820	120721	6.4401e-06	*
2	25249365	25250888	60736	6.4401e-06	*
7	62417503	62417927	123741	6.44892e-06	*
13	50317361	50317649	25923	6.45626e-06	*
23	23328893	23329979	81217	6.52039e-06	*
10	27363035	27364473	8357	6.52046e-06	*
16	21808091	21808730	38559	6.53847e-06	*
15	28709687	28710542	34196	6.54857e-06	*
24	26819994	26821091	86986	6.54857e-06	*
24	23277203	23278020	86558	6.55009e-06	*
10	21851284	21852536	7791	6.55169e-06	*
7	35540642	35541687	120888	6.55169e-06	*
18	36979595	36980226	51575	6.5572e-06	*
10	27902041	27902617	8445	6.60085e-06	*
17	28845751	28846696	45259	6.60122e-06	*
11	24717704	24718332	12957	6.61519e-06	*
10	31415454	31416185	8807	6.61916e-06	*
13	18924398	18924982	22398	6.64371e-06	*
9	7534554	7536485	131226	6.65103e-06	*
24	23897144	23898565	86657	6.68325e-06	*
7	20427270	20427735	118656	6.71617e-06	*
14	35134710	35136385	29604	6.72698e-06	*
20	21287482	21288648	66201	6.72698e-06	*
4	8142399	8144286	100004	6.72698e-06	*
5	55091561	55091988	109014	6.7512e-06	*
13	13293110	13295397	21839	6.80112e-06	*
10	4181176	4182443	6389	6.82768e-06	*
9	6687721	6689279	131151	6.8985e-06	*
22	38440774	38441263	78732	6.92277e-06	*
11	11653522	11654099	11719	6.93795e-06	*
14	20465492	20465871	27885	6.93795e-06	*
24	4486544	4487985	84805	6.94024e-06	*
23	18056600	18057926	80565	6.9414e-06	*
7	52616205	52617002	122831	6.99156e-06	*
21	23640171	23641331	72804	6.99156e-06	*
9	14666249	14666738	131971	7.00197e-06	*
3	57845658	57846685	98191	7.03468e-06	*
5	32574050	32575593	106667	7.03575e-06	*
14	28135108	28135594	28692	7.03575e-06	*
2	8122814	8125844	59410	7.05798e-06	*
9	28960864	28961618	133368	7.06737e-06	*
17	32571377	32571977	45661	7.09591e-06	*
6	43115712	43116897	114931	7.14492e-06	*
7	35862667	35863732	120956	7.1457e-06	*
8	26800237	26801539	127913	7.1643e-06	*
7	21393480	21393997	118800	7.20618e-06	*
15	62023	63657	31386	7.25025e-06	*
9	6818052	6818670	131171	7.28051e-06	*
7	68264149	68266254	124120	7.31502e-06	*
24	13265974	13267482	85694	7.36034e-06	*
17	35883470	35884248	46051	7.36136e-06	*
18	45043977	45044531	52409	7.40369e-06	*
11	21912851	21916696	12604	7.4053e-06	*
9	23320256	23322435	132788	7.46254e-06	*
7	68021374	68023079	124090	7.49437e-06	*
17	24231391	24231944	44652	7.50243e-06	*
21	8508493	8509015	71203	7.51382e-06	*
1	5523937	5524594	652	7.51409e-06	*
10	39623992	39625140	9756	7.53415e-06	*
2	35923536	35924960	61949	7.55702e-06	*
10	42274358	42275412	9976	7.57827e-06	*
1	30574240	30575632	2805	7.60543e-06	*
22	35911805	35912691	78390	7.60543e-06	*
16	14073727	14074832	37974	7.60543e-06	*
7	51104231	51105342	122661	7.62725e-06	*
17	27427992	27429367	45092	7.63863e-06	*
13	35345549	35347044	24371	7.65591e-06	*
17	34789713	34790814	45920	7.66979e-06	*
2	22029894	22031268	60399	7.67938e-06	*
19	25715209	25716186	55865	7.67938e-06	*
7	68727599	68728909	124228	7.69622e-06	*
20	31637694	31638550	67588	7.70192e-06	*
16	6121059	6122404	37198	7.70624e-06	*
7	12325790	12327007	117772	7.72834e-06	*
17	35605955	35606664	46004	7.73287e-06	*
15	16251774	16252921	32723	7.73318e-06	*
4	19533290	19536173	101720	7.74993e-06	*
6	14271665	14272817	112242	7.75766e-06	*
9	13177492	13178884	131775	7.76418e-06	*
16	30655462	30656773	39501	7.78619e-06	*
4	17081453	17082681	101410	7.78904e-06	*
3	36990491	36991343	96462	7.84702e-06	*
KZ115993.1	16870	17257	138048	7.85272e-06	*
16	46217514	46217986	41302	7.85641e-06	*
17	28009452	28009972	45187	7.85884e-06	*
20	46742578	46742925	69172	7.87203e-06	*
20	37086627	37087842	68256	7.87625e-06	*
9	50303994	50304481	135627	7.89721e-06	*
17	37834581	37835527	46254	7.9039e-06	*
10	38338231	38339666	9608	7.92452e-06	*
5	16241627	16241931	104740	7.97778e-06	*
17	30374252	30375294	45443	8.0802e-06	*
20	17739498	17744634	65820	8.10325e-06	*
6	52702050	52703075	115961	8.15131e-06	*
7	52455440	52456179	122781	8.16738e-06	*
23	28293966	28296199	81924	8.17461e-06	*
16	7779610	7780606	37402	8.17461e-06	*
17	5973257	5974220	42782	8.17461e-06	*
25	23026721	23028072	91031	8.25361e-06	*
20	4298015	4298995	64930	8.27196e-06	*
16	13547639	13548351	37920	8.31681e-06	*
2	41630054	41630564	62545	8.32748e-06	*
5	40773130	40774377	107664	8.4017e-06	*
21	23193232	23198206	72716	8.45413e-06	*
18	2477045	2478074	47959	8.49872e-06	*
23	30184934	30186187	82180	8.50153e-06	*
16	3591820	3592359	36919	8.50865e-06	*
1	7776745	7777088	933	8.52137e-06	*
18	22886811	22887676	50365	8.58188e-06	*
1	46168992	46170705	4261	8.58317e-06	*
17	5291186	5292478	42725	8.59396e-06	*
21	20696770	20699950	72489	8.59442e-06	*
1	51506308	51507609	4909	8.59762e-06	*
25	32180138	32181695	91626	8.61499e-06	*
18	24924474	24925571	50707	8.62017e-06	*
10	33001548	33002776	9023	8.70707e-06	*
19	24663010	24663809	55769	8.76856e-06	*
1	39556723	39558683	3573	8.80883e-06	*
24	10631008	10632038	85514	8.85521e-06	*
1	47299509	47301115	4458	8.86078e-06	*
15	29610808	29611613	34326	8.89339e-06	*
15	18291233	18292307	32911	8.89385e-06	*
18	36999731	37000508	51577	8.91082e-06	*
13	13732899	13733436	21885	8.94623e-06	*
2	21891636	21893704	60377	8.95935e-06	*
22	28783729	28784435	77818	8.99537e-06	*
10	10219280	10220347	6897	9.02654e-06	*
21	16005216	16006216	71914	9.05417e-06	*
5	25459814	25460528	105834	9.0894e-06	*
12	1276451	1276995	15697	9.09247e-06	*
10	37133867	37135104	9464	9.13889e-06	*
7	17052709	17053285	118291	9.19617e-06	*
5	32535498	32537350	106658	9.19746e-06	*
7	52576166	52576928	122821	9.21306e-06	*
13	30261369	30262349	23659	9.25192e-06	*
2	35948435	35949090	61954	9.25987e-06	*
9	13436882	13438386	131813	9.33026e-06	*
24	23876476	23877117	86653	9.33154e-06	*
11	23198497	23199876	12748	9.34418e-06	*
7	33678628	33680246	120596	9.35154e-06	*
7	52476633	52477118	122787	9.37113e-06	*
18	24014313	24015369	50575	9.38596e-06	*
25	11341789	11342108	89917	9.42219e-06	*
24	21429595	21430186	86381	9.4394e-06	*
20	34521566	34522151	67980	9.4394e-06	*
15	7010987	7011695	32071	9.45781e-06	*
9	34058263	34059080	134013	9.46682e-06	*
3	7725073	7726034	92865	9.4674e-06	*
18	20335126	20335389	50055	9.50119e-06	*
9	27054396	27055353	133174	9.51629e-06	*
17	35773818	35774461	46032	9.52484e-06	*
18	24303684	24304704	50625	9.53755e-06	*
KN150136.1	35865	36532	137085	9.53755e-06	*
9	4933393	4934918	131020	9.58966e-06	*
18	22623363	22624371	50326	9.60051e-06	*
13	29840439	29841256	23602	9.61553e-06	*
4	8424354	8425188	100062	9.64762e-06	*
6	23886890	23887934	112894	9.65339e-06	*
3	40476800	40478674	96779	9.67632e-06	*
6	9098483	9099041	111762	9.69277e-06	*
2	48794087	48795676	63354	9.69653e-06	*
16	19265237	19266281	38281	9.6999e-06	*
9	37584923	37585762	134341	9.70746e-06	*
9	7515928	7516899	131222	9.70746e-06	*
2	26428566	26429804	60868	9.71043e-06	*
18	19705905	19706608	49925	9.75699e-06	*
19	31851243	31852846	56615	9.78985e-06	*
12	26994698	26995273	17890	9.81538e-06	*
1	51179319	51180508	4855	9.82236e-06	*
7	62140237	62141095	123719	9.83576e-06	*
8	269043	269743	124885	9.88385e-06	*
14	26740760	26741389	28578	9.89535e-06	*
6	59492606	59493240	116738	9.90335e-06	*
2	35695936	35696811	61897	9.90943e-06	*
20	7569175	7570132	65178	9.92487e-06	*
17	9202787	9204067	43062	9.92858e-06	*
21	44680184	44681033	74632	9.93244e-06	*
14	45061234	45062360	30645	9.97049e-06	*
16	1560907	1561254	36784	9.9742e-06	*
13	5555732	5557912	21069	9.97937e-06	*
9	55106680	55107351	136064	9.9809e-06	*
7	33578841	33580797	120576	1.01061e-05	*
6	6514691	6515394	111470	1.01157e-05	*
10	40214305	40214888	9818	1.02005e-05	*
18	18051829	18052613	49735	1.02165e-05	*
3	12335053	12337748	93222	1.02612e-05	*
9	52780420	52780945	135856	1.02666e-05	*
5	52081575	52082528	108800	1.02773e-05	*
24	34265544	34266949	87679	1.02773e-05	*
7	46356701	46357516	122181	1.03244e-05	*
15	6889956	6890608	32057	1.03448e-05	*
6	2106785	2107720	110994	1.03456e-05	*
19	19617880	19618425	55291	1.03456e-05	*
5	17864508	17865310	104919	1.03499e-05	*
1	35756778	35757232	3139	1.0362e-05	*
7	33225045	33225439	120499	1.03705e-05	*
9	23324767	23325791	132790	1.03876e-05	*
15	33000205	33000949	34739	1.03876e-05	*
10	27152427	27153478	8300	1.04064e-05	*
19	34112088	34112610	56939	1.04064e-05	*
24	41200668	41202054	88448	1.04064e-05	*
3	6671090	6673434	92767	1.04123e-05	*
11	11217113	11217719	11686	1.04132e-05	*
10	1797313	1797804	6156	1.04261e-05	*
7	35850040	35852273	120952	1.05699e-05	*
20	21462363	21463236	66233	1.05714e-05	*
23	19086128	19087061	80682	1.06106e-05	*
3	35432098	35433150	96243	1.06341e-05	*
9	6446760	6447382	131125	1.06583e-05	*
8	19125001	19125408	126932	1.07322e-05	*
18	24266567	24266862	50617	1.07581e-05	*
12	886366	886875	15650	1.07618e-05	*
18	45541880	45542573	52452	1.07641e-05	*
7	21687531	21688300	118833	1.0781e-05	*
3	41909106	41910810	96943	1.08374e-05	*
24	23866230	23867029	86651	1.08472e-05	*
24	23314096	23318019	86573	1.0853e-05	*
25	35683864	35684742	92045	1.08708e-05	*
7	16012765	16013511	118150	1.09526e-05	*
6	7398916	7400324	111600	1.10279e-05	*
7	54743376	54744005	123085	1.10499e-05	*
2	33385874	33386704	61717	1.10499e-05	*
15	14042141	14043028	32515	1.1052e-05	*
7	35728432	35729382	120928	1.10554e-05	*
5	42912364	42913660	107895	1.10575e-05	*
11	24108503	24109096	12884	1.11307e-05	*
13	10172742	10173547	21502	1.11307e-05	*
21	28882229	28883093	73310	1.11307e-05	*
9	8436630	8437430	131345	1.11436e-05	*
10	4626537	4627163	6415	1.11489e-05	*
21	38245066	38245858	74077	1.11568e-05	*
13	11931810	11932485	21731	1.11649e-05	*
15	14446342	14447514	32546	1.11849e-05	*
25	8557199	8557937	89723	1.11994e-05	*
7	49774947	49775773	122551	1.1223e-05	*
14	1903332	1903858	26504	1.12454e-05	*
23	32863908	32864514	82565	1.12614e-05	*
1	11495213	11497306	1225	1.13052e-05	*
20	37780369	37780838	68330	1.13072e-05	*
5	30434587	30435066	106371	1.13552e-05	*
3	25734897	25735700	95014	1.14173e-05	*
7	37447343	37449640	121230	1.14327e-05	*
16	21619234	21621998	38537	1.14477e-05	*
5	40545160	40545619	107630	1.14608e-05	*
14	7682438	7683771	27105	1.14608e-05	*
5	49382833	49384910	108496	1.14688e-05	*
20	30850645	30851384	67491	1.15294e-05	*
11	35904352	35905110	14246	1.15453e-05	*
14	42877943	42879193	30489	1.15471e-05	*
9	41527664	41528661	134682	1.1561e-05	*
23	23636867	23637667	81291	1.15696e-05	*
5	62411752	62412669	109526	1.16716e-05	*
21	23767661	23768876	72823	1.17176e-05	*
7	543544	545535	116956	1.17543e-05	*
11	25001969	25003435	13003	1.17549e-05	*
10	10896815	10897723	6959	1.17944e-05	*
20	30123284	30124407	67386	1.19376e-05	*
25	31404867	31405547	91560	1.19587e-05	*
12	8776242	8778528	16386	1.19607e-05	*
9	21951588	21952768	132637	1.19647e-05	*
25	14912502	14913448	90245	1.19913e-05	*
8	46937159	46938037	129483	1.20364e-05	*
3	30349564	30350157	95547	1.20674e-05	*
10	20413348	20414072	7662	1.21953e-05	*
23	8636775	8637868	79819	1.22037e-05	*
6	33767924	33768259	114058	1.22174e-05	*
18	25894351	25895370	50809	1.22513e-05	*
20	31306289	31307333	67533	1.22526e-05	*
19	36189446	36190105	57191	1.22526e-05	*
2	59088384	59089649	64403	1.22917e-05	*
18	23757900	23758937	50516	1.2295e-05	*
11	20796510	20797862	12431	1.23512e-05	*
7	65983070	65983751	123938	1.23801e-05	*
24	13911341	13912201	85731	1.23967e-05	*
18	17791629	17793104	49661	1.24345e-05	*
24	21237977	21239458	86334	1.24548e-05	*
10	42272070	42273242	9975	1.24551e-05	*
1	39491067	39491670	3555	1.24698e-05	*
19	28220933	28221656	56147	1.24731e-05	*
17	46090850	46091797	46986	1.24941e-05	*
2	33073366	33074440	61624	1.25388e-05	*
3	40427474	40428788	96761	1.25404e-05	*
4	17030405	17034737	101391	1.25501e-05	*
24	1182523	1183063	84325	1.25501e-05	*
9	28366728	28367869	133292	1.25896e-05	*
9	20368719	20369331	132411	1.26117e-05	*
24	4491497	4493461	84807	1.26627e-05	*
13	12692593	12693578	21786	1.27232e-05	*
20	17772434	17773344	65830	1.28268e-05	*
16	40196854	40197701	40638	1.28715e-05	*
17	10921962	10922733	43258	1.29587e-05	*
1	38865856	38866642	3453	1.29587e-05	*
24	7412417	7412952	85175	1.29587e-05	*
17	11325980	11326792	43344	1.29602e-05	*
13	14925952	14927719	21948	1.29604e-05	*
10	27686443	27686819	8424	1.30091e-05	*
3	32818411	32819611	95897	1.3035e-05	*
24	19880703	19881709	86205	1.30774e-05	*
17	15433247	15434160	43722	1.30794e-05	*
4	13940899	13941945	100868	1.3105e-05	*
23	22845166	22846235	81102	1.312e-05	*
17	35714996	35715577	46021	1.312e-05	*
14	49557811	49558929	31084	1.31794e-05	*
22	11023777	11024492	76015	1.31966e-05	*
24	21299567	21300381	86354	1.31991e-05	*
12	36589338	36590434	19031	1.32613e-05	*
3	20521379	20521942	94249	1.32796e-05	*
6	1456030	1457742	110911	1.328e-05	*
5	32782089	32782877	106709	1.32931e-05	*
5	15241497	15242731	104572	1.32958e-05	*
2	41627602	41628064	62544	1.33109e-05	*
1	50868320	50869376	4791	1.33109e-05	*
11	6101606	6103456	11225	1.33461e-05	*
3	40559167	40560738	96797	1.33585e-05	*
23	14558537	14559288	80280	1.33635e-05	*
11	21711009	21711679	12562	1.33635e-05	*
1	13272581	13274838	1370	1.3427e-05	*
7	51314441	51316041	122679	1.34602e-05	*
6	33456697	33457712	114002	1.34676e-05	*
24	4239666	4240576	84749	1.34704e-05	*
4	11311091	11312239	100503	1.34787e-05	*
13	31623029	31624264	23905	1.34848e-05	*
6	32167351	32168084	113846	1.35194e-05	*
9	37302746	37303437	134320	1.35404e-05	*
22	12980344	12981922	76322	1.35446e-05	*
23	27664142	27666045	81816	1.35512e-05	*
4	17020142	17021531	101386	1.35912e-05	*
3	60745093	60746065	98466	1.3617e-05	*
13	5888110	5888468	21126	1.36367e-05	*
22	10791298	10791939	75970	1.36405e-05	*
13	49234862	49235612	25780	1.36542e-05	*
3	53581305	53581784	97759	1.36542e-05	*
11	16338945	16339863	12040	1.36959e-05	*
17	35644229	35645093	46008	1.37349e-05	*
7	65738358	65738847	123899	1.38029e-05	*
3	24172326	24173596	94833	1.38224e-05	*
9	27295563	27296511	133194	1.38879e-05	*
20	4081860	4082809	64911	1.39511e-05	*
7	53398541	53399384	122897	1.39815e-05	*
17	1152887	1153384	42423	1.40365e-05	*
3	38769790	38771406	96586	1.40586e-05	*
18	1983278	1983703	47917	1.40902e-05	*
6	25654912	25656176	113120	1.41125e-05	*
10	33059232	33060234	9034	1.42822e-05	*
10	4107906	4108757	6373	1.42822e-05	*
16	4224238	4224847	36971	1.42822e-05	*
8	15172679	15174041	126441	1.43238e-05	*
13	45950724	45952018	25360	1.43535e-05	*
9	17540685	17541746	132225	1.43821e-05	*
9	54783208	54785192	136032	1.44338e-05	*
24	10585443	10586310	85506	1.44394e-05	*
7	36993452	36995371	121140	1.44439e-05	*
3	26480528	26481707	95126	1.44679e-05	*
2	24853566	24853994	60685	1.45085e-05	*
9	6775997	6776951	131165	1.45686e-05	*
17	16794043	16794633	43861	1.4593e-05	*
15	39493693	39494458	35522	1.46974e-05	*
21	2701182	2702145	70446	1.47346e-05	*
12	25505929	25506860	17671	1.47523e-05	*
9	50273585	50274709	135622	1.47563e-05	*
1	47264465	47265150	4446	1.48009e-05	*
9	45871666	45872467	135192	1.48485e-05	*
11	21942525	21944467	12614	1.49389e-05	*
1	38687512	38688400	3430	1.49389e-05	*
14	11162079	11162734	27342	1.5015e-05	*
2	10362482	10363854	59568	1.50697e-05	*
[truncated: 21,347 more rows]

## Sheet: Table S5
Supplemental Table 5: Differentially accessible regions (DARs) that exhibit greater accessibility in the sox17E 28 hpf compared to sox17N 28hpf population.
DARs were calculated using DiffBind version 3.0.15 (Stark and Brown, 2011) with the DESeq2 option (Love, Huber and Anders, 2014), on the broad peaks files (.broadPeak) produced by MACS2. R version 4.2.1 (R Core Team, 2021) was used for this processing.
chrom	chromStart	chromEnd	names	FDR score	strand
23	33289195	33290060	82614	0.00061444	*
8	10323213	10324152	125961	0.00061444	*
1	19387461	19388355	1869	0.00061444	*
10	17415814	17416279	7451	0.000714231	*
21	7927871	7928321	71133	0.000714231	*
17	42549744	42550201	46672	0.000818373	*
12	36035324	36035745	18983	0.000942633	*
14	32660670	32661076	29227	0.000942633	*
14	40821240	40822216	30281	0.00115094	*
17	37690569	37691191	46217	0.00143	*
11	2329314	2330047	10809	0.00150768	*
11	24756075	24756535	12967	0.00152184	*
6	55884713	55885369	116339	0.00152184	*
12	22295317	22295722	17290	0.0017114	*
21	38153609	38154070	74067	0.0017114	*
15	23749761	23750180	33493	0.00210494	*
9	7365587	7366438	131205	0.00294416	*
22	36592460	36593001	78495	0.00297287	*
21	25764283	25765071	73023	0.0030809	*
12	25361823	25362148	17646	0.0030809	*
22	17677510	17679018	76852	0.0030809	*
7	49663862	49664281	122535	0.0030809	*
19	15180774	15181214	54971	0.0030809	*
10	22147612	22148383	7829	0.0030809	*
20	24130825	24131232	66625	0.00349853	*
10	28194753	28196038	8498	0.00349853	*
13	24527268	24528264	22895	0.00349853	*
6	2951236	2952297	111086	0.00349853	*
13	8179588	8179951	21346	0.00349853	*
9	33965635	33966307	133999	0.00349853	*
17	51871609	51871993	47358	0.00349853	*
5	16309501	16309855	104749	0.00353062	*
9	9023484	9024215	131415	0.00353062	*
2	32033582	32034182	61481	0.00380061	*
17	27639601	27640087	45119	0.00387706	*
8	11126130	11126379	126043	0.0040926	*
4	889365	890280	98955	0.00410092	*
6	28887994	28888681	113442	0.00410092	*
16	46695466	46695874	41373	0.00410092	*
20	16913144	16913402	65786	0.00517136	*
24	19985833	19986827	86230	0.00553104	*
25	15328485	15329743	90309	0.00553104	*
8	20204193	20204727	127143	0.0055726	*
1	38402403	38402900	3415	0.0055726	*
5	56479359	56479780	109098	0.00571944	*
2	35990089	35990562	61961	0.00572985	*
4	16489670	16490516	101277	0.00587412	*
23	14570331	14570906	80283	0.00608751	*
10	22529457	22530133	7856	0.00610306	*
23	8678846	8679421	79828	0.00610306	*
20	5159868	5160195	65027	0.00616989	*
9	28221819	28222362	133259	0.00616989	*
1	26629435	26629878	2541	0.00643815	*
KN149953.1	24280	24589	136695	0.00649963	*
6	32171721	32172185	113848	0.00658337	*
3	22889220	22889582	94556	0.00684507	*
1	18695009	18695566	1786	0.00688609	*
22	22021352	22022859	77399	0.00689891	*
23	18836944	18837336	80625	0.00715527	*
25	32158857	32159112	91620	0.00731548	*
3	37578791	37579813	96513	0.00739667	*
2	41892184	41893019	62594	0.00739667	*
8	27149370	27149868	127950	0.0074864	*
21	45804321	45804625	74795	0.00757379	*
19	34852736	34853487	57009	0.00757379	*
11	27428547	27428945	13354	0.00757379	*
24	19891669	19892225	86208	0.0076414	*
10	15491802	15492569	7304	0.00766775	*
5	51046462	51046952	108721	0.00767225	*
23	33580274	33581180	82662	0.00776422	*
2	22457415	22458017	60455	0.00795833	*
23	45396427	45396777	83998	0.00804402	*
4	4256202	4256544	99456	0.00817546	*
16	27343512	27343951	39136	0.00817546	*
7	56758804	56759087	123371	0.00832389	*
2	22429544	22430563	60452	0.00852374	*
6	34179563	34179958	114110	0.00852374	*
6	23890408	23891194	112896	0.00854724	*
4	22504117	22504469	102063	0.00854965	*
1	26622045	26622311	2540	0.00854965	*
8	31102697	31102945	128407	0.00897215	*
18	25807248	25808296	50798	0.00897215	*
8	47354906	47355312	129520	0.00965867	*
8	48984065	48984710	129680	0.00973227	*
24	38670612	38671309	88155	0.00973227	*
19	26091612	26091976	55961	0.00973227	*
13	36031600	36032149	24451	0.00973227	*
12	43563616	43564305	19675	0.00973359	*
4	11642693	11643080	100566	0.00990594	*
20	45812096	45812503	69082	0.00990594	*
14	26763279	26765481	28584	0.00999971	*
18	6802877	6803695	48408	0.0100645	*
22	5682437	5683018	75605	0.0103624	*
10	142534	142977	5844	0.0103849	*
22	34586583	34587110	78266	0.0103849	*
4	21459534	21460143	101953	0.0105322	*
25	11215558	11216175	89892	0.0106901	*
11	24091893	24092302	12880	0.0106901	*
KN150411.1	12863	14198	137515	0.0107777	*
16	26676293	26677034	39058	0.0107777	*
5	55091561	55091988	109014	0.0109256	*
19	43643181	43643453	57926	0.0114585	*
6	32167351	32168084	113846	0.0116758	*
17	53172236	53172892	47587	0.0119826	*
7	19835413	19836173	118572	0.0119826	*
4	18920263	18920783	101659	0.0120062	*
16	4224238	4224847	36971	0.0121803	*
14	5485074	5485687	26865	0.0121803	*
16	45398191	45398736	41227	0.0121803	*
22	37264179	37264606	78586	0.0121803	*
23	24067469	24068782	81361	0.0121803	*
14	41661789	41662913	30362	0.0121803	*
21	9484036	9484556	71218	0.0121803	*
22	26670091	26670699	77731	0.0121803	*
18	20387046	20388015	50068	0.0121803	*
23	23388932	23389295	81235	0.0122905	*
17	11008866	11009080	43276	0.0123247	*
6	59902168	59902771	116815	0.0123279	*
25	10672330	10672597	89837	0.0124182	*
25	15289897	15290550	90298	0.0124524	*
2	41776626	41776922	62571	0.0124524	*
9	42882498	42883344	134862	0.0124524	*
4	14399209	14400251	100954	0.0124524	*
19	12234504	12235342	54725	0.0125036	*
13	29546445	29546776	23558	0.0125256	*
10	35148711	35150128	9232	0.0125256	*
16	39529922	39530344	40527	0.0125256	*
5	32422439	32423057	106637	0.0125256	*
11	5860275	5860638	11189	0.0126432	*
22	29855259	29855850	77924	0.0127841	*
9	33885459	33886172	133975	0.0128203	*
16	36046408	36046955	40205	0.0130032	*
18	22106452	22107071	50247	0.0130204	*
7	62417503	62417927	123741	0.0131509	*
20	23604370	23604629	66519	0.0131512	*
24	21429595	21430186	86381	0.0131731	*
17	16608048	16609215	43830	0.0132793	*
10	31302408	31302782	8789	0.0132996	*
17	5976623	5976996	42783	0.0133755	*
17	26907030	26907569	44999	0.0133755	*
15	28278703	28279175	34117	0.0134388	*
23	36450398	36451253	83085	0.0134462	*
13	31644152	31647473	23912	0.0134556	*
23	19768750	19769356	80748	0.0135769	*
20	14734985	14735570	65580	0.0136702	*
16	36051392	36052481	40208	0.0136702	*
3	24080670	24081151	94801	0.0136702	*
3	14442342	14442822	93486	0.0136702	*
14	26174496	26174887	28475	0.0136702	*
5	36865255	36865776	107213	0.0136702	*
6	40657454	40658007	114666	0.0136702	*
1	12135016	12135376	1286	0.0138051	*
6	12912402	12912912	112118	0.0139425	*
22	29424754	29425135	77866	0.0139749	*
24	2406949	2408442	84528	0.0142526	*
13	37165761	37166388	24625	0.0142581	*
22	11016716	11017448	76012	0.0142581	*
2	47730742	47731214	63246	0.0142919	*
13	22480210	22480945	22685	0.0144827	*
22	22337249	22337919	77425	0.0147433	*
KN150074.1	6379	7334	136943	0.0148326	*
15	22502790	22503189	33361	0.0148556	*
23	34005535	34005979	82716	0.0152946	*
11	21871671	21872002	12594	0.0153895	*
5	58557568	58557994	109244	0.0153895	*
22	22215323	22215963	77411	0.0156739	*
5	27898085	27898480	106087	0.0157176	*
4	21456184	21456689	101952	0.0157528	*
20	11261945	11262274	65447	0.0157528	*
13	38817449	38818298	24742	0.0157528	*
3	12453513	12453882	93243	0.0157956	*
15	27029192	27030147	33894	0.0159419	*
17	42310750	42311441	46650	0.0159657	*
9	37116451	37116974	134268	0.0160025	*
24	31206473	31206865	87429	0.0161536	*
5	27864942	27866109	106078	0.0162258	*
18	46298030	46298488	52567	0.0162258	*
25	15997673	15998100	90344	0.0164314	*
23	24069243	24070655	81362	0.0165387	*
4	4565551	4566253	99495	0.0165783	*
15	36486461	36486965	35190	0.0167113	*
17	25524742	25525162	44862	0.016723	*
22	29420593	29420962	77865	0.0167271	*
3	16951133	16951473	93805	0.016953	*
15	36445151	36445444	35189	0.016953	*
14	65889	66502	26180	0.016953	*
22	661042	662360	74983	0.0170602	*
21	3684926	3685240	70582	0.0170679	*
17	21719135	21719941	44370	0.0170679	*
23	24071269	24072521	81363	0.0170721	*
9	21853702	21854639	132628	0.0172621	*
20	14732471	14732858	65579	0.0174541	*
7	6743493	6743960	117275	0.0174794	*
14	16316286	16316618	27626	0.0178431	*
8	44293472	44293888	129328	0.0179595	*
10	22148914	22150567	7830	0.0180517	*
23	10146373	10146691	79980	0.0180948	*
17	10806823	10807352	43242	0.0181138	*
9	30659384	30660302	133531	0.0181138	*
12	26426319	26428407	17794	0.0181138	*
17	16784871	16785763	43858	0.0181138	*
14	30291452	30291866	28868	0.0181138	*
5	16205392	16205745	104734	0.0181621	*
18	7308666	7309301	48451	0.0182909	*
7	25035955	25036255	119291	0.0183461	*
21	25738550	25739081	73016	0.0183461	*
10	13325640	13326012	7143	0.0183461	*
7	38563838	38564498	121376	0.0183461	*
5	15113857	15114126	104545	0.0183674	*
23	24072871	24073907	81364	0.0183674	*
21	6545450	6545766	70968	0.0183674	*
11	44731355	44733432	15318	0.0183674	*
9	18655414	18655803	132306	0.0183983	*
15	12432734	12433118	32466	0.0183983	*
18	43926184	43927448	52254	0.0183983	*
5	60192356	60192806	109357	0.0184794	*
9	33932598	33933155	133989	0.018647	*
20	15449946	15450646	65679	0.0189098	*
1	18918121	18919606	1821	0.0189941	*
16	16968585	16969102	38153	0.0192443	*
2	48079381	48079595	63290	0.0192591	*
12	31210963	31211415	18382	0.019366	*
7	37974228	37974790	121311	0.0193793	*
14	30690953	30692166	28912	0.0193793	*
7	5726	5859	116908	0.0193793	*
5	48971842	48972346	108443	0.0193793	*
12	2964608	2965012	15872	0.0194486	*
17	22810035	22810337	44485	0.0195864	*
2	57359094	57360695	64125	0.0195864	*
13	4859900	4860495	20938	0.0197626	*
5	29830815	29832240	106290	0.0197626	*
17	10837982	10838818	43247	0.0197626	*
20	34542861	34544240	67985	0.0197626	*
2	41799250	41799511	62574	0.0197626	*
24	10429302	10429933	85492	0.0197626	*
12	8707881	8708658	16371	0.0197844	*
16	7443184	7443594	37347	0.0198863	*
21	36555579	36556025	73847	0.0199017	*
24	1538511	1538970	84395	0.0199017	*
21	19368668	19370431	72308	0.0200122	*
16	53471300	53472177	42011	0.0200306	*
12	19364768	19365006	17098	0.0200609	*
9	33947435	33948047	133996	0.0200954	*
24	25158654	25159455	86833	0.0201156	*
11	35150756	35151195	14148	0.0202852	*
2	28448162	28448471	61089	0.0203126	*
13	22515707	22515987	22694	0.0204801	*
20	24057062	24057312	66599	0.0204801	*
3	17212067	17212830	93838	0.0204801	*
14	15790028	15790509	27591	0.0204801	*
24	13777127	13777415	85716	0.0204801	*
18	22608243	22608767	50319	0.0207489	*
1	15380288	15380641	1548	0.0207743	*
1	37371639	37372418	3328	0.0210504	*
20	23696672	23696937	66538	0.0212058	*
22	29779720	29780017	77912	0.0212216	*
17	15695507	15695950	43742	0.0212239	*
25	7354769	7355213	89603	0.0212581	*
19	41736216	41737021	57668	0.0213377	*
7	33835060	33835942	120628	0.0215552	*
1	20593572	20594146	1988	0.0215552	*
18	20353568	20354033	50059	0.0215552	*
22	29847628	29848474	77923	0.0215552	*
25	11150142	11150598	89886	0.0216209	*
23	28209736	28210542	81903	0.0217162	*
6	25805087	25805619	113135	0.0221886	*
15	14957352	14957786	32595	0.0221886	*
13	43331964	43332274	25133	0.0221886	*
8	30968193	30969854	128385	0.0221886	*
8	23216321	23218469	127457	0.0221886	*
10	35143221	35143580	9230	0.0221886	*
23	20210088	20210707	80793	0.0222531	*
7	35933267	35933789	120976	0.022365	*
20	53002878	53003143	69760	0.0224153	*
12	18764280	18764699	17023	0.0224292	*
23	2493141	2493690	79185	0.0224996	*
20	20504604	20505329	66081	0.0227487	*
14	30389951	30390641	28875	0.0227487	*
24	10880514	10880957	85545	0.0228279	*
20	32282380	32282917	67672	0.0228279	*
9	16474171	16474588	132135	0.0228279	*
16	4273894	4274516	36974	0.0228279	*
11	31420716	31421398	13771	0.0230308	*
8	8914713	8915231	125778	0.0230308	*
6	32788610	32789409	113928	0.0230308	*
5	13002779	13003139	104278	0.0230308	*
16	43083	44253	36488	0.0233883	*
15	31813828	31814332	34615	0.0233951	*
3	23820177	23821699	94746	0.0234326	*
14	41674528	41675482	30365	0.0237338	*
25	15308072	15308572	90303	0.0237711	*
5	30467510	30468303	106380	0.0238168	*
6	11154972	11155216	111944	0.0238809	*
18	27063951	27064290	50919	0.023955	*
7	37983088	37983539	121314	0.0240621	*
19	11154212	11154849	54631	0.0240914	*
15	8696603	8697299	32219	0.0240914	*
14	30785238	30785646	28933	0.0240914	*
4	11581564	11582851	100553	0.0244266	*
15	45284806	45285214	36111	0.0246239	*
13	8840287	8841398	21417	0.0247655	*
9	3079764	3079963	130806	0.0247738	*
15	9328539	9329271	32287	0.0247949	*
12	17058284	17059447	16885	0.0249529	*
24	14649872	14650462	85849	0.0249529	*
9	48006955	48007632	135466	0.0250497	*
7	9904150	9904710	117542	0.0253444	*
20	42431154	42431697	68797	0.025359	*
4	3165288	3165541	99353	0.0255386	*
11	18717516	18718026	12247	0.0256466	*
5	2805632	2806304	103450	0.0257222	*
6	48078191	48079314	115441	0.0258707	*
6	42884144	42884552	114894	0.025884	*
6	31880488	31880999	113792	0.0259742	*
24	21535099	21535333	86399	0.0260997	*
17	21715960	21717127	44369	0.0262183	*
13	42709767	42710398	25081	0.0264631	*
1	24832465	24832791	2347	0.0265974	*
11	35859652	35860391	14238	0.0266356	*
21	25688200	25688825	73013	0.0267317	*
18	26718676	26719826	50888	0.0267625	*
23	2404731	2405379	79167	0.0268099	*
24	25599337	25600209	86871	0.0269902	*
20	23498144	23498407	66502	0.0269902	*
11	35949827	35950283	14249	0.0270612	*
1	24624657	24624966	2340	0.0270612	*
1	35918393	35919601	3166	0.0270612	*
10	11121513	11121842	7000	0.0275703	*
20	45910991	45911598	69097	0.0281313	*
13	25961026	25961566	23120	0.0282108	*
13	35348805	35349141	24372	0.0284059	*
3	49520610	49521296	97488	0.0285991	*
13	25489178	25489935	23039	0.0285991	*
16	17610656	17611557	38205	0.0285991	*
15	20930662	20931795	33188	0.0285991	*
17	40373820	40374007	46494	0.0285991	*
13	31634473	31635246	23909	0.0286586	*
24	8035619	8035922	85238	0.0286592	*
16	43448377	43448797	41054	0.0288131	*
14	3024192	3024492	26618	0.0288822	*
3	17176090	17176737	93832	0.0289655	*
10	6330529	6330806	6576	0.0291764	*
5	24962019	24962370	105775	0.0292389	*
16	42937544	42938029	40999	0.0293417	*
2	2104919	2105264	58826	0.0295318	*
6	28802055	28802578	113422	0.0295421	*
19	26207681	26208114	55983	0.0295421	*
16	35628815	35629190	40140	0.0295421	*
3	20224612	20224903	94222	0.0295421	*
7	65751255	65751807	123901	0.0296791	*
20	13964337	13964568	65537	0.0297118	*
KZ116011.1	10658	11200	138057	0.0297118	*
20	19546206	19546636	65995	0.0297207	*
9	8008036	8008499	131294	0.0297683	*
6	43270471	43271406	114949	0.0297703	*
14	30688592	30689516	28911	0.0298082	*
7	15252371	15252676	118051	0.0299447	*
17	37787668	37788533	46241	0.030067	*
20	36884933	36885750	68235	0.0301679	*
14	41328604	41328989	30324	0.0301679	*
6	23940820	23941323	112907	0.0302128	*
KZ115963.1	4075	4338	138026	0.0302128	*
8	48877263	48877725	129672	0.0302706	*
3	57205728	57206464	98138	0.0305127	*
23	14654767	14655249	80295	0.0307029	*
23	1017361	1017875	78980	0.0308155	*
22	22340504	22340824	77426	0.0309485	*
14	51066535	51066908	31181	0.0311325	*
24	14054181	14055127	85765	0.0313262	*
14	26753979	26754699	28582	0.0313634	*
17	23044558	23045182	44510	0.0316737	*
19	48241215	48241778	58486	0.0317047	*
23	24928567	24929115	81476	0.0317655	*
14	40786784	40788192	30273	0.0317655	*
20	20516436	20517186	66084	0.0318578	*
12	4065057	4065410	15992	0.0323023	*
5	40744937	40745381	107659	0.0326635	*
14	12253244	12254032	27400	0.0326689	*
9	42328317	42328807	134788	0.0326869	*
6	39312522	39313383	114523	0.0326904	*
22	26570980	26571654	77719	0.0329765	*
15	18064888	18065280	32891	0.0329957	*
6	2933764	2934255	111084	0.0329957	*
10	28146233	28146866	8487	0.0329957	*
11	21950513	21950981	12615	0.0330152	*
5	27875961	27876292	106081	0.0330314	*
1	18971776	18972610	1828	0.0332156	*
25	31450388	31451272	91568	0.0336046	*
19	7611065	7611669	54305	0.0341488	*
23	35403832	35404073	82886	0.0343243	*
12	36726805	36727286	19047	0.0343243	*
20	23640123	23640803	66528	0.0343243	*
18	25022105	25022411	50728	0.0343243	*
3	29991261	29991995	95495	0.0343243	*
22	38149683	38150395	78700	0.0347475	*
5	16194521	16195174	104731	0.0347475	*
12	8982247	8983026	16427	0.0348257	*
10	33218107	33218458	9065	0.0348257	*
24	6542814	6543720	85115	0.0348257	*
3	19785114	19785347	94136	0.0348542	*
1	51575536	51576159	4926	0.0348542	*
17	29293686	29294639	45324	0.0348542	*
1	44176936	44177747	4031	0.0348602	*
13	47610058	47610736	25576	0.0349709	*
13	10016036	10016527	21478	0.0351028	*
4	15016782	15018218	101052	0.0356507	*
16	13545184	13545868	37919	0.0356507	*
6	206544	207971	110706	0.0357528	*
25	11341789	11342108	89917	0.0357528	*
20	15018303	15018914	65622	0.0359956	*
23	41364484	41364961	83599	0.036088	*
21	38827394	38827897	74140	0.036251	*
19	19460700	19461482	55271	0.036251	*
16	7487492	7488423	37353	0.036251	*
23	24010273	24010906	81354	0.0367326	*
2	17842552	17843086	60037	0.0367326	*
13	36020552	36021328	24449	0.0369039	*
24	11076080	11076526	85561	0.0369647	*
19	23014375	23014946	55648	0.0369647	*
3	19838963	19839714	94141	0.036976	*
KN150405.1	29697	30188	137495	0.0371724	*
23	27203632	27204140	81749	0.03726	*
19	22583862	22584709	55623	0.0374439	*
12	25960858	25961571	17740	0.0374439	*
1	31022241	31022471	2848	0.0374528	*
22	29755283	29755761	77908	0.0374528	*
8	16649749	16650785	126636	0.0375632	*
1	10270131	10270400	1138	0.037639	*
16	26648067	26648721	39055	0.037639	*
8	29779059	29779330	128203	0.037639	*
13	8843605	8844410	21418	0.0378848	*
15	37737933	37738388	35306	0.0378955	*
6	32067773	32068420	113820	0.0379266	*
24	35187188	35187907	87782	0.0379269	*
1	58965007	58965529	5661	0.0379606	*
1	36816206	36816515	3275	0.0380161	*
5	41610666	41611031	107783	0.038103	*
11	44758322	44758927	15326	0.038103	*
17	37982472	37983328	46284	0.0381425	*
14	41452120	41452615	30339	0.0382302	*
14	45145299	45145587	30665	0.0382302	*
8	16984846	16985124	126672	0.0382302	*
23	13814524	13815456	80223	0.0382302	*
18	27187883	27188305	50931	0.0382302	*
15	42420598	42421162	35843	0.0384219	*
15	24016155	24016678	33544	0.0385602	*
2	3192866	3193342	58927	0.0386812	*
11	21246221	21246970	12471	0.0388598	*
9	46459656	46460281	135287	0.0390456	*
23	44601053	44602054	83907	0.0390704	*
4	4659197	4659862	99515	0.0391277	*
20	19550479	19551250	65996	0.0391782	*
1	15159544	15159906	1504	0.0392799	*
1	46493439	46494142	4307	0.0394569	*
13	32224712	32225203	23986	0.0394569	*
18	25583626	25584403	50763	0.0394569	*
23	5363907	5364278	79505	0.0394569	*
3	11127625	11128230	93101	0.0394569	*
25	31404867	31405547	91560	0.0394569	*
11	32698039	32698620	13907	0.039477	*
3	36003154	36004328	96332	0.0395279	*
19	40238426	40238836	57488	0.0395279	*
21	23109906	23110231	72704	0.0395388	*
17	5960188	5961537	42779	0.0395795	*
5	44533514	44534835	108051	0.0396334	*
20	16543598	16544201	65760	0.0404373	*
6	41470319	41470948	114742	0.0404959	*
3	34484549	34485250	96141	0.0404959	*
20	22666438	22666821	66379	0.0404959	*
5	24837287	24837783	105751	0.0404959	*
13	5209108	5210990	20990	0.0404984	*
23	31127067	31127707	82277	0.0407516	*
13	4299502	4299806	20864	0.0409683	*
13	25229108	25229670	23009	0.0410337	*
9	49803517	49804022	135584	0.0410337	*
10	33025343	33025794	9027	0.0414034	*
9	39019512	39020027	134496	0.0415915	*
5	41394965	41395929	107742	0.0415915	*
10	28976822	28977334	8615	0.0417154	*
7	18001831	18002555	118369	0.0417154	*
20	42403922	42404233	68793	0.0419594	*
2	31464339	31465013	61419	0.0419594	*
16	13547639	13548351	37920	0.0419594	*
6	28767335	28768298	113417	0.0419594	*
1	13113016	13113519	1356	0.0419649	*
15	24001028	24001315	33539	0.0419649	*
4	4729465	4730077	99530	0.0419649	*
6	1846071	1847062	110953	0.0419735	*
4	11321334	11321782	100507	0.0419798	*
18	45966928	45967206	52515	0.0420281	*
6	57746798	57747128	116544	0.0422443	*
6	20793490	20794103	112737	0.0422443	*
6	23975911	23977013	112914	0.0422443	*
6	50565163	50565546	115733	0.0422443	*
11	2714724	2715224	10857	0.0422443	*
18	41161566	41162221	52017	0.0422443	*
22	10522977	10523824	75908	0.0423183	*
25	15297361	15298180	90300	0.0425302	*
5	61578608	61578845	109438	0.042581	*
2	25249365	25250888	60736	0.042678	*
23	14607994	14608315	80287	0.0427777	*
9	14574689	14575131	131954	0.0429926	*
3	37574651	37575095	96510	0.0433496	*
1	58956361	58957644	5659	0.0433541	*
17	51888287	51888599	47367	0.0434193	*
23	27155260	27155775	81740	0.0435422	*
6	50272058	50272814	115696	0.0435422	*
7	55491749	55492324	123164	0.0435422	*
6	44071697	44072001	115067	0.0435422	*
16	5406825	5407772	37113	0.0436057	*
22	22703426	22704020	77471	0.0436459	*
6	23886890	23887934	112894	0.0436459	*
2	17832863	17833451	60036	0.0436807	*
21	9406488	9407129	71215	0.0437111	*
2	24301330	24301897	60617	0.0437111	*
3	22259743	22260072	94436	0.0437111	*
22	10826579	10827158	75978	0.0437111	*
18	50014424	50014704	53044	0.0437111	*
20	53717753	53718748	69823	0.0437111	*
13	7593699	7594238	21273	0.0437111	*
4	14414453	14415246	100960	0.0437111	*
12	22407480	22407928	17307	0.0437111	*
3	23408886	23409404	94633	0.0437111	*
3	44820120	44820450	97144	0.0440462	*
13	35410721	35411021	24379	0.0441811	*
10	3771498	3772066	6323	0.0441811	*
8	31059333	31059960	128399	0.0441811	*
18	35455534	35456204	51472	0.0441811	*
7	62408618	62409400	123740	0.0441811	*
23	39012730	39013285	83385	0.0441811	*
2	55995876	55996325	63978	0.0442646	*
12	34501272	34501756	18749	0.0443717	*
20	23598430	23598952	66517	0.0444089	*
7	73688391	73688670	124736	0.0445461	*
7	53491828	53492188	122916	0.0445461	*
15	34702724	34703190	34938	0.0445461	*
12	14078504	14079266	16730	0.0445878	*
1	11075243	11075819	1203	0.0445883	*
7	51244823	51245480	122673	0.0446537	*
19	184407	185118	53275	0.0446867	*
20	37586749	37588046	68300	0.0449182	*
14	7125070	7125775	27036	0.0450981	*
7	69879146	69881676	124365	0.0451242	*
18	44075060	44075829	52277	0.04535	*
16	29618484	29619162	39387	0.0454983	*
9	14516068	14516939	131942	0.0455606	*
23	22588252	22588675	81038	0.0457058	*
1	26060090	26060875	2474	0.0457274	*
2	30286671	30287037	61288	0.0458045	*
14	17119766	17120226	27725	0.0458574	*
4	11640352	11640774	100565	0.04596	*
7	55127484	55128044	123148	0.0460791	*
19	1141680	1142355	53468	0.0460791	*
22	17688580	17689796	76855	0.0461357	*
2	31790479	31791365	61443	0.0461782	*
5	15469094	15469535	104617	0.0463232	*
1	44200580	44201186	4037	0.0463232	*
19	1524980	1525468	53518	0.0467991	*
9	41527664	41528661	134682	0.0468611	*
21	16195543	16196597	71934	0.0468644	*
17	51897798	51898125	47369	0.0469456	*
18	10814082	10814725	48859	0.0469456	*
2	20920940	20921517	60253	0.0469713	*
6	49684574	49685521	115628	0.0470024	*
11	13151795	13152437	11799	0.0470024	*
14	23520577	23521110	28172	0.0470241	*
20	51965418	51965900	69665	0.0470616	*
20	46498390	46499132	69139	0.0470616	*
1	31704969	31705374	2898	0.0475116	*
20	20135364	20135803	66021	0.0475638	*
2	37006403	37007753	62026	0.0476126	*
6	49062658	49063238	115546	0.0476824	*
5	9830616	9831014	104083	0.0477683	*
2	32153187	32153774	61502	0.04783	*
13	28599468	28599742	23454	0.0479193	*
2	25271994	25272903	60741	0.048034	*
24	20148192	20150988	86240	0.0481421	*
21	28448535	28449531	73251	0.0482325	*
9	21951588	21952768	132637	0.0483165	*
11	24726820	24727313	12960	0.0483165	*
2	750669	751262	58692	0.0485222	*
6	32816136	32816609	113933	0.0485222	*
21	14714308	14714619	71793	0.0485414	*
14	37611523	37611979	29889	0.0487569	*
7	32901395	32901916	120451	0.048782	*
2	42739296	42739652	62686	0.048844	*
17	26867494	26868093	44995	0.0489885	*
16	23561389	23561876	38698	0.0489885	*
5	42321270	42321681	107879	0.0491036	*
16	24830588	24830985	38844	0.0493232	*
13	7929335	7929931	21314	0.0494817	*
23	14602337	14602923	80286	0.0498189	*
9	14439394	14439932	131920	0.0498494	*
18	25894351	25895370	50809	0.0498678	*
8	50289060	50289535	129829	0.0498979	*
19	15940084	15940474	55072	0.0498979	*
7	49668290	49668622	122537	0.0499066	*
7	38950449	38950974	121431	0.0499405	*
4	13440703	13441826	100806	0.0499754	*

## Sheet: Table S6
Supplemental Table 6: Differentially accessible regions (DARs) that exhibit greater accessibility in the sox17E 48 hpf compared to sox17M 48hpf population.
DARs were calculated using DiffBind version 3.0.15 (Stark and Brown, 2011) with the DESeq2 option (Love, Huber and Anders, 2014), on the broad peaks files (.broadPeak) produced by MACS2. R version 4.2.1 (R Core Team, 2021) was used for this processing.
chrom	chromStart	chromEnd	names	FDR score	strand
12	42973005	42973618	26149	6.12399e-17	*
15	19566265	19566909	43974	9.21722e-17	*
4	16663670	16664690	133312	6.5963e-16	*
1	38865830	38866668	4768	1.16205e-15	*
24	10467594	10468364	112662	1.16205e-15	*
3	19864350	19864895	123747	1.2493e-15	*
23	25575042	25575638	107446	2.35275e-15	*
14	35098989	35099886	39344	2.36662e-15	*
6	30501356	30502429	149072	2.65654e-15	*
KN150640.1	56	786	181037	3.89475e-15	*
7	30345759	30346431	157231	5.95617e-15	*
14	3257952	3259069	35225	1.20054e-14	*
24	19454312	19455050	113575	1.35268e-14	*
5	7642473	7643130	136495	1.58103e-14	*
22	11047629	11048150	100181	2.1848e-14	*
4	13940883	13941963	132673	2.1848e-14	*
21	41150573	41152401	98229	4.62655e-14	*
25	6592279	6592855	117945	5.117e-14	*
6	47426201	47427829	151528	5.23046e-14	*
6	2107062	2107750	145625	6.12295e-14	*
19	40965908	40966668	76528	6.12295e-14	*
6	36703172	36704077	150058	6.82683e-14	*
17	10343238	10343969	57192	7.14056e-14	*
1	7542285	7542765	1228	8.93617e-14	*
13	32746804	32748155	31785	9.98466e-14	*
3	18457479	18458769	123584	1.25109e-13	*
9	32859360	32860856	175829	1.39439e-13	*
19	32222520	32223310	75182	1.53657e-13	*
2	35948280	35949094	82202	1.58107e-13	*
6	36501975	36502743	150008	1.63041e-13	*
4	18665901	18666609	133740	1.7143e-13	*
25	35502258	35503319	121358	1.73028e-13	*
5	44533473	44534767	141785	1.94601e-13	*
7	18259839	18260527	155130	2.03088e-13	*
21	20514840	20516033	95670	2.15206e-13	*
24	4810657	4811264	111812	2.29669e-13	*
15	18045919	18047012	43806	2.4613e-13	*
1	50981966	50982712	6567	2.72496e-13	*
2	45683535	45684400	83632	2.83097e-13	*
17	11022427	11023130	57308	2.83097e-13	*
10	31156339	31156996	11796	3.3942e-13	*
25	31303201	31303744	120691	3.3942e-13	*
9	14467048	14468056	173111	3.3942e-13	*
17	27687909	27689192	59941	3.45064e-13	*
15	20023943	20025510	44036	3.69023e-13	*
5	58953735	58954168	143472	3.88897e-13	*
3	41864052	41864781	127379	4.71339e-13	*
14	25959095	25959981	37734	4.83189e-13	*
3	23167006	23167667	124323	4.87171e-13	*
18	46644984	46646080	69881	4.89894e-13	*
10	31871778	31872274	11971	5.27841e-13	*
10	17415784	17416620	9866	5.33694e-13	*
16	21071034	21072251	51218	5.33694e-13	*
22	11023847	11024495	100174	5.39164e-13	*
8	1563597	1564140	163924	5.74092e-13	*
25	31293188	31294280	120689	5.85552e-13	*
19	31811514	31812126	75069	6.87809e-13	*
11	28490773	28491416	17882	6.88802e-13	*
7	40004697	40005663	159249	7.17493e-13	*
16	38100863	38101841	53751	7.94548e-13	*
4	22572062	22572566	134459	8.24437e-13	*
23	23336865	23337548	107014	8.9978e-13	*
15	39371958	39372839	47416	9.54115e-13	*
15	26849150	26850203	45159	9.72405e-13	*
25	5850386	5852469	117799	9.90194e-13	*
5	65295194	65296407	144206	1.2292e-12	*
8	35655000	35655664	168876	1.33292e-12	*
15	43362230	43362875	47966	1.38751e-12	*
20	29388940	29389896	89141	1.41406e-12	*
9	51186344	51187249	178458	1.51412e-12	*
KN149973.1	6735	7514	179661	1.51656e-12	*
20	48276185	48276658	91878	1.82734e-12	*
18	19718839	19721025	66366	1.83312e-12	*
21	44680212	44681202	98683	2.00503e-12	*
3	23171633	23172600	124324	2.04662e-12	*
17	11012523	11014125	57305	2.12488e-12	*
24	19517986	19519980	113589	2.34948e-12	*
20	36470412	36471005	90328	2.40592e-12	*
16	7795723	7796506	49847	2.64167e-12	*
23	2404144	2405677	104342	2.96349e-12	*
16	19858230	19859088	51050	3.02094e-12	*
1	54404173	54404626	7112	3.13348e-12	*
8	7727775	7728547	164610	3.22657e-12	*
15	16262662	16263720	43613	3.41917e-12	*
4	14399182	14400170	132791	3.52875e-12	*
17	23245867	23246560	59162	3.83171e-12	*
16	46253307	46253877	54976	4.40772e-12	*
7	25451846	25453077	156329	4.87699e-12	*
13	46369133	46369897	33724	4.96214e-12	*
14	30291429	30291972	38414	4.9974e-12	*
23	24629159	24629856	107306	5.17845e-12	*
11	39044294	39045145	19292	5.35346e-12	*
6	50648672	50649908	152033	5.39904e-12	*
24	27543997	27544612	114907	5.85921e-12	*
20	34521491	34522383	90051	5.95543e-12	*
7	44758580	44759376	159957	6.10405e-12	*
1	897498	898096	209	6.22398e-12	*
6	30439579	30440921	149064	6.56209e-12	*
16	4311523	4312193	49319	7.43205e-12	*
7	36242954	36243805	158535	7.92792e-12	*
10	10952794	10953508	9185	8.26045e-12	*
13	46631018	46632174	33783	8.41179e-12	*
18	15028226	15029138	65611	8.64842e-12	*
15	35358438	35359062	46754	8.80258e-12	*
12	2380719	2381276	20870	8.88662e-12	*
20	22826141	22827078	87985	8.88662e-12	*
25	30830619	30832042	120613	8.88662e-12	*
11	2329097	2330071	14226	8.88662e-12	*
22	19605478	19606330	101646	8.99477e-12	*
10	27901854	27902734	11310	9.04465e-12	*
24	37880666	37881550	116262	9.2907e-12	*
11	18758931	18759649	16149	9.37795e-12	*
19	2161561	2162424	71208	9.39799e-12	*
8	19706950	19707922	166527	1.01489e-11	*
14	45061132	45062336	40966	1.03455e-11	*
7	35755125	35756025	158404	1.06537e-11	*
10	27443023	27444757	11194	1.07606e-11	*
15	2010562	2011389	42124	1.0808e-11	*
11	43049272	43050094	19908	1.08199e-11	*
10	31974111	31975236	11985	1.08654e-11	*
9	21503741	21505155	174025	1.08654e-11	*
7	30718539	30719092	157330	1.08654e-11	*
1	49312528	49313451	6293	1.10594e-11	*
19	22486426	22487258	73727	1.13755e-11	*
5	9852506	9853772	136707	1.14266e-11	*
21	7927817	7928520	93862	1.14266e-11	*
7	31741836	31742481	157568	1.18987e-11	*
11	8543278	8543960	15155	1.23497e-11	*
15	21890280	21890808	44359	1.24519e-11	*
3	23107109	23107778	124310	1.24519e-11	*
21	41153199	41155051	98230	1.30638e-11	*
8	12319525	12320437	165317	1.34298e-11	*
1	22677228	22678841	2962	1.34514e-11	*
10	26605715	26606338	11004	1.3546e-11	*
18	14821419	14822233	65576	1.39942e-11	*
9	13470826	13471283	172955	1.41426e-11	*
15	32924909	32925653	46335	1.43901e-11	*
22	16988273	16988843	101221	1.4467e-11	*
8	275564	276346	163797	1.45139e-11	*
KN150104.1	50771	51871	179965	1.61721e-11	*
12	5650307	5650916	21257	1.64969e-11	*
18	24303650	24304621	67235	1.72616e-11	*
24	14142734	14143634	113049	1.72616e-11	*
17	21926975	21927636	58966	1.79026e-11	*
3	27035812	27037142	125093	1.88737e-11	*
4	18127326	18127751	133637	1.98895e-11	*
14	42043054	42043979	40553	2.19856e-11	*
10	4755958	4756743	8433	2.25267e-11	*
19	40951643	40952135	76524	2.41429e-11	*
20	34436412	34437370	90026	2.41429e-11	*
18	23984089	23985296	67167	2.49508e-11	*
8	50100741	50101557	170288	2.56933e-11	*
1	24159934	24161113	3182	2.56933e-11	*
2	3544157	3546255	78260	2.71351e-11	*
11	31343790	31344417	18216	2.75765e-11	*
1	17373808	17375526	2382	2.80943e-11	*
13	7988948	7989637	28146	2.92212e-11	*
14	31212569	31213280	38602	3.09003e-11	*
8	31590444	31591562	168415	3.14015e-11	*
14	31258624	31259075	38613	3.2806e-11	*
2	41074620	41075424	82952	3.40822e-11	*
2	32040932	32041701	81561	3.48784e-11	*
9	14665559	14666814	173159	3.50617e-11	*
1	5763620	5764096	959	3.57263e-11	*
7	68394025	68395138	162868	3.57263e-11	*
24	26881914	26882685	114815	3.57263e-11	*
15	32711441	32711801	46296	3.67212e-11	*
9	23343842	23344838	174310	3.77754e-11	*
5	36339828	36341246	140588	3.84147e-11	*
5	7218017	7219209	136439	3.85788e-11	*
19	15450568	15451607	72994	3.92835e-11	*
13	17244582	17245320	29202	4.02479e-11	*
21	41147275	41148193	98228	4.07275e-11	*
19	12574843	12575882	72678	4.17289e-11	*
2	43252791	43253585	83289	4.19875e-11	*
23	22850922	22852805	106878	4.23973e-11	*
24	35456296	35456885	115982	4.25618e-11	*
18	45561606	45562376	69708	4.5573e-11	*
22	33003200	33003976	103135	4.69033e-11	*
15	42006023	42007039	47810	4.69033e-11	*
1	13278758	13279803	1909	4.74134e-11	*
17	18320844	18321768	58420	4.87423e-11	*
17	50746870	50747759	62851	4.91784e-11	*
1	29708548	29709598	3722	4.98797e-11	*
7	53128244	53129939	161102	5.08858e-11	*
12	37108045	37108792	25428	5.08858e-11	*
20	20497631	20500782	87560	5.16342e-11	*
12	37987345	37987865	25608	5.25593e-11	*
KN150021.1	93709	94981	179759	5.45292e-11	*
23	45710259	45710815	110653	5.54857e-11	*
20	20494770	20496101	87559	5.54857e-11	*
16	46268721	46270689	54980	5.735e-11	*
17	31731909	31732303	60601	5.83778e-11	*
1	31996493	31997617	3977	5.90554e-11	*
24	8164200	8165100	112355	5.93558e-11	*
15	8716981	8717482	42917	5.97907e-11	*
9	16658208	16658708	173445	5.97907e-11	*
21	25604582	25605407	96457	6.03602e-11	*
12	27559566	27561191	23831	6.19356e-11	*
21	320500	321042	92696	6.52646e-11	*
3	60757937	60758803	129475	6.59045e-11	*
17	48387196	48387789	62615	6.73401e-11	*
14	31939389	31940233	38713	6.76793e-11	*
1	11448680	11449267	1686	6.80062e-11	*
9	37180342	37181085	176511	6.92656e-11	*
10	27414627	27416122	11184	6.99264e-11	*
9	45926596	45927524	177752	6.99679e-11	*
11	44770188	44771282	20258	7.08625e-11	*
5	49662367	49663425	142467	7.17978e-11	*
20	45300972	45302645	91510	7.17978e-11	*
19	15191960	15193602	72957	7.38927e-11	*
6	49165152	49165869	151807	7.41228e-11	*
12	31623151	31624704	24459	7.56695e-11	*
20	20484486	20486775	87554	7.56695e-11	*
14	26542160	26542786	37835	7.86726e-11	*
18	20382005	20384060	66521	7.88209e-11	*
16	34074536	34076230	53207	7.99292e-11	*
12	6502879	6503371	21379	8.06705e-11	*
3	40038122	40038798	127079	8.06705e-11	*
20	20516427	20517170	87566	8.27408e-11	*
1	20081007	20081648	2731	8.29813e-11	*
14	1862410	1863142	34992	8.58161e-11	*
14	45077806	45078549	40971	8.63393e-11	*
4	12882260	12883317	132463	8.88811e-11	*
25	6628309	6629591	117956	8.99721e-11	*
9	37183640	37185409	176512	9.04751e-11	*
11	23457349	23459639	16934	9.07805e-11	*
3	23220703	23223043	124335	9.13291e-11	*
1	20593175	20594252	2783	9.15243e-11	*
23	3302383	3302857	104505	9.53709e-11	*
7	32225161	32225657	157643	9.72401e-11	*
20	11177591	11178969	86651	1.04439e-10	*
5	885792	886605	135760	1.06883e-10	*
18	20399999	20400960	66527	1.09256e-10	*
23	26423535	26424167	107589	1.11623e-10	*
9	12717718	12718249	172809	1.12401e-10	*
24	38830899	38832014	116390	1.12629e-10	*
14	49658425	49659520	41519	1.14566e-10	*
15	42396946	42398311	47859	1.15543e-10	*
16	46274569	46275314	54981	1.16835e-10	*
19	45498693	45499696	77187	1.20878e-10	*
5	49573085	49574050	142446	1.22648e-10	*
17	50709002	50710544	62841	1.23181e-10	*
20	27116775	27117529	88747	1.25895e-10	*
17	1987996	1988565	56364	1.26067e-10	*
20	48243767	48244229	91872	1.30401e-10	*
7	27366479	27369151	156705	1.36623e-10	*
20	15465804	15466702	86985	1.40057e-10	*
1	27155438	27156413	3601	1.40637e-10	*
19	6258070	6258899	71865	1.4105e-10	*
21	38284795	38285835	97948	1.44758e-10	*
16	18741196	18741721	50905	1.45307e-10	*
KN150136.1	3396	4291	180078	1.46267e-10	*
12	16346764	16347475	22255	1.55459e-10	*
24	13214130	13215133	112922	1.61645e-10	*
5	26475594	26476056	139044	1.62979e-10	*
24	23876347	23877057	114323	1.63898e-10	*
1	34668896	34669336	4218	1.65019e-10	*
11	6114517	6118117	14828	1.70816e-10	*
14	3277549	3278168	35229	1.70816e-10	*
8	10296260	10297384	165027	1.71861e-10	*
21	20618061	20619286	95704	1.77167e-10	*
5	56716538	56717151	143237	1.86841e-10	*
10	15397863	15398641	9638	1.94021e-10	*
19	33451332	33451983	75412	1.96547e-10	*
5	22028408	22029219	138370	1.99624e-10	*
13	46575812	46576488	33770	1.99624e-10	*
8	10242364	10242970	165015	2.02804e-10	*
4	20877707	20878290	134150	2.03198e-10	*
8	23501776	23503353	167114	2.07688e-10	*
25	6609307	6609906	117951	2.12096e-10	*
23	23683113	23684133	107111	2.12202e-10	*
23	5364983	5366013	104766	2.15697e-10	*
2	33875173	33875812	81889	2.16425e-10	*
12	37267289	37268401	25470	2.30915e-10	*
20	21821624	21822093	87793	2.33545e-10	*
13	32739687	32741840	31784	2.33903e-10	*
18	2988089	2988602	63814	2.35884e-10	*
15	1397146	1398239	42055	2.39999e-10	*
17	50640121	50641294	62830	2.40776e-10	*
1	35716560	35717308	4298	2.42662e-10	*
1	24020166	24022168	3143	2.42838e-10	*
22	3649913	3650785	99443	2.43593e-10	*
7	21434126	21434803	155646	2.43968e-10	*
22	15683338	15683830	100937	2.45011e-10	*
24	11691484	11692469	112824	2.48342e-10	*
7	46495680	46496287	160197	2.54875e-10	*
8	51502903	51503807	170483	2.56626e-10	*
12	37995213	37996077	25610	2.58602e-10	*
21	20621466	20622213	95705	2.62446e-10	*
20	20509328	20509834	87564	2.72238e-10	*
6	42846947	42847645	150818	2.78145e-10	*
10	28755467	28756295	11489	2.83943e-10	*
1	46172242	46172936	5813	2.89488e-10	*
12	25960807	25961636	23501	2.8998e-10	*
15	2301650	2302856	42169	2.8998e-10	*
1	49222363	49223105	6282	2.92277e-10	*
7	26861776	26862770	156592	2.92277e-10	*
3	41818522	41819784	127366	3.08221e-10	*
7	29870204	29871076	157152	3.10878e-10	*
13	10129885	10130601	28355	3.14212e-10	*
12	30109358	30110154	24181	3.1519e-10	*
13	17181388	17182848	29185	3.25259e-10	*
21	28878690	28879683	96920	3.25259e-10	*
13	17099801	17100529	29162	3.28895e-10	*
20	30759198	30760020	89398	3.31305e-10	*
10	35502148	35502992	12481	3.31419e-10	*
13	46437214	46438199	33743	3.3258e-10	*
7	21268419	21269373	155608	3.41655e-10	*
11	31341824	31342629	18215	3.44638e-10	*
16	34249259	34250059	53227	3.47351e-10	*
25	16385388	16386103	119183	3.52971e-10	*
10	31986724	31987979	11989	3.66838e-10	*
21	5129112	5129742	93441	3.68155e-10	*
15	40873222	40873864	47692	3.73349e-10	*
9	36976211	36977124	176461	3.80115e-10	*
6	55884361	55885463	152787	3.80173e-10	*
23	36371013	36374299	109500	3.8533e-10	*
5	43571700	43572751	141627	3.8858e-10	*
18	22641812	22642549	66872	3.9228e-10	*
8	51514693	51515304	170486	4.07444e-10	*
23	6417271	6418439	104927	4.10079e-10	*
7	35834273	35836128	158422	4.25103e-10	*
2	43362885	43363653	83307	4.26716e-10	*
8	37183552	37184441	168988	4.26935e-10	*
25	22913135	22914073	119988	4.31291e-10	*
12	38609702	38610139	25699	4.32364e-10	*
6	44434089	44434769	151189	4.37902e-10	*
25	29645364	29646282	120507	4.54424e-10	*
1	39612609	39614084	4955	4.54424e-10	*
16	30217253	30218170	52540	4.60518e-10	*
13	17144032	17145131	29175	4.60518e-10	*
16	11041706	11042818	50225	4.62837e-10	*
20	30308127	30308932	89315	4.68737e-10	*
16	4681215	4681746	49382	4.69252e-10	*
21	34632493	34633519	97511	4.69252e-10	*
3	47336014	47336852	127944	4.78616e-10	*
16	50827483	50828039	55524	5.03479e-10	*
14	22040831	22042179	37141	5.07844e-10	*
23	19331	20782	103968	5.48715e-10	*
12	2401755	2402490	20876	5.49853e-10	*
18	37342845	37344185	68590	5.49853e-10	*
20	49208798	49210115	91996	5.5066e-10	*
14	49557713	49559175	41497	5.50666e-10	*
3	46304241	46304933	127829	5.53406e-10	*
3	50873641	50874628	128265	5.54005e-10	*
13	42124047	42125057	33149	5.56985e-10	*
3	22861749	22863226	124266	5.65308e-10	*
9	37156100	37157021	176503	5.65308e-10	*
20	15204121	15205141	86940	5.67259e-10	*
15	47564647	47566384	48486	5.75713e-10	*
20	29108339	29109722	89106	5.79042e-10	*
20	23804189	23804651	88179	5.8052e-10	*
1	49314646	49315633	6294	5.8519e-10	*
23	1963980	1964803	104266	5.86035e-10	*
20	17772442	17773331	87212	5.92963e-10	*
21	26629747	26630780	96593	6.07136e-10	*
9	37265707	37266218	176542	6.07136e-10	*
3	20258062	20258787	123836	6.1151e-10	*
8	13106200	13107208	165398	6.12755e-10	*
10	42263781	42264728	13323	6.13536e-10	*
5	7325394	7325879	136464	6.36758e-10	*
16	46695318	46695901	55042	6.42047e-10	*
13	35173312	35173963	32247	6.68866e-10	*
11	23467670	23468836	16936	6.96252e-10	*
12	8715396	8716143	21675	6.96684e-10	*
19	42962018	42962756	76856	7.00443e-10	*
14	31113306	31115263	38575	7.0421e-10	*
21	23767625	23768884	96168	7.07657e-10	*
5	52294667	52295746	142853	7.13262e-10	*
19	2289161	2289708	71252	7.32338e-10	*
6	26706320	26707095	148507	7.33324e-10	*
17	50622784	50623575	62824	7.40623e-10	*
7	57684924	57685404	161802	7.54873e-10	*
9	16145063	16146145	173326	7.59064e-10	*
9	7377950	7378631	172086	7.60925e-10	*
20	49683570	49684524	92066	7.78877e-10	*
1	51514617	51515914	6668	7.86532e-10	*
12	27481890	27482911	23805	7.99839e-10	*
25	18583623	18584253	119547	8.02209e-10	*
14	38714762	38716233	39955	8.04703e-10	*
2	32551012	32551595	81650	8.25149e-10	*
KZ115993.1	16820	17365	181224	8.32773e-10	*
14	44897934	44899051	40936	8.32782e-10	*
24	11075980	11076576	112764	8.36325e-10	*
12	2749104	2749633	20916	8.36325e-10	*
10	35416328	35417719	12458	8.36325e-10	*
14	48800910	48801350	41424	8.37295e-10	*
7	67027760	67028215	162671	8.44011e-10	*
7	57646106	57647441	161797	8.44641e-10	*
7	46439645	46440785	160175	8.51693e-10	*
19	26102165	26104676	74179	8.54019e-10	*
14	51045519	51046471	41618	8.56653e-10	*
17	20557768	20558823	58745	8.65902e-10	*
16	19418315	19419008	50983	8.68679e-10	*
20	45597116	45597842	91548	8.68998e-10	*
24	4710728	4711355	111787	8.72015e-10	*
13	5208927	5211053	27749	8.72233e-10	*
5	64585487	64586589	144119	8.72233e-10	*
18	47130553	47132803	69961	8.80531e-10	*
KN149774.1	6891	8870	179257	8.90392e-10	*
7	49025864	49026325	160583	9.04533e-10	*
3	28074355	28075967	125241	9.10766e-10	*
5	19516492	19517366	137978	9.11505e-10	*
18	48280495	48281268	70190	9.25836e-10	*
22	15595413	15595969	100911	9.27534e-10	*
15	14059275	14059887	43354	9.28364e-10	*
3	55577418	55578210	128856	9.38818e-10	*
20	23823812	23824564	88183	9.55095e-10	*
24	35464543	35465441	115984	9.58631e-10	*
11	28320971	28322756	17831	9.63013e-10	*
2	552862	553505	77870	9.633e-10	*
9	19480692	19481600	173734	9.66469e-10	*
20	45815585	45816834	91569	9.66469e-10	*
21	32110472	32111556	97237	9.72783e-10	*
19	3695284	3696420	71510	9.76067e-10	*
14	15910806	15912013	36500	1.00068e-09	*
9	8431817	8433703	172266	1.00485e-09	*
6	37330856	37331567	150138	1.00924e-09	*
20	30771052	30771502	89401	1.00924e-09	*
11	34039881	34040694	18599	1.02083e-09	*
7	62417498	62417935	162219	1.0241e-09	*
9	1869754	1870639	171254	1.04227e-09	*
6	206751	208123	145244	1.04227e-09	*
7	52551370	52552597	161033	1.05021e-09	*
16	21061389	21062560	51216	1.0531e-09	*
15	39575021	39575640	47489	1.0531e-09	*
20	21953786	21954982	87826	1.0531e-09	*
10	27362969	27365019	11167	1.06283e-09	*
19	5387323	5388618	71740	1.06626e-09	*
2	21359547	21361399	80018	1.07133e-09	*
21	6519322	6520420	93660	1.08026e-09	*
6	55970895	55972340	152806	1.08702e-09	*
2	39947130	39947896	82734	1.0986e-09	*
3	12280889	12282043	122628	1.10281e-09	*
7	22397689	22398961	155813	1.11169e-09	*
10	1751908	1752770	8014	1.112e-09	*
22	19610181	19610864	101647	1.11537e-09	*
8	48352607	48353006	170088	1.12342e-09	*
4	17081424	17082628	133425	1.13432e-09	*
5	48947160	48947917	142318	1.14602e-09	*
3	29980339	29980781	125540	1.1679e-09	*
9	34058322	34059402	176058	1.17122e-09	*
2	23159393	23160873	80290	1.17587e-09	*
11	21949758	21951647	16677	1.18816e-09	*
16	8496737	8497347	49958	1.20164e-09	*
21	37579016	37579673	97838	1.20268e-09	*
20	51525578	51526175	92222	1.21587e-09	*
18	37326259	37327551	68586	1.22338e-09	*
15	42020594	42021189	47815	1.22841e-09	*
7	68522830	68523908	162907	1.22862e-09	*
6	27558954	27560447	148644	1.25482e-09	*
KN150640.1	7196	8366	181040	1.25487e-09	*
19	46515452	46516065	77366	1.25647e-09	*
10	33218084	33218506	12210	1.25647e-09	*
24	27297527	27298572	114886	1.27823e-09	*
12	34587972	34589361	24948	1.28512e-09	*
1	35756732	35757239	4304	1.2952e-09	*
20	6606973	6607853	86112	1.2952e-09	*
8	9424475	9424989	164893	1.34122e-09	*
15	20086042	20086731	44043	1.34122e-09	*
2	586866	587642	77879	1.37623e-09	*
6	36716559	36717619	150061	1.37849e-09	*
22	37017782	37018305	103638	1.38011e-09	*
24	26819676	26821982	114797	1.39314e-09	*
22	30168578	30169211	102836	1.40338e-09	*
5	49049788	49050803	142337	1.4049e-09	*
1	25498661	25499461	3385	1.4049e-09	*
20	49218862	49219968	91998	1.40869e-09	*
18	46310902	46311433	69840	1.41626e-09	*
23	20894604	20895510	106565	1.41818e-09	*
14	3023423	3024845	35191	1.44127e-09	*
20	53326303	53327088	92408	1.45617e-09	*
19	40941262	40941851	76520	1.47516e-09	*
2	24533168	24533933	80443	1.4776e-09	*
22	21484305	21484873	101976	1.48124e-09	*
6	52792705	52793510	152348	1.48605e-09	*
24	26857391	26858616	114808	1.48639e-09	*
15	20018650	20019929	44034	1.48771e-09	*
3	54934315	54935163	128743	1.48771e-09	*
17	50498859	50500209	62802	1.49534e-09	*
1	47299519	47301091	6046	1.51225e-09	*
7	583838	584538	153484	1.5184e-09	*
21	59044	60546	92633	1.5219e-09	*
25	30977277	30980322	120643	1.54005e-09	*
11	21031531	21032581	16436	1.55763e-09	*
5	50497827	50498822	142650	1.56108e-09	*
14	31950724	31951781	38716	1.57757e-09	*
6	27565216	27566049	148646	1.59935e-09	*
17	31155088	31156274	60527	1.60543e-09	*
17	21043804	21044913	58817	1.63144e-09	*
8	31325193	31325950	168376	1.69446e-09	*
6	39333842	39334916	150377	1.70641e-09	*
KN149717.1	15378	15991	179142	1.76502e-09	*
8	31107393	31107924	168351	1.77336e-09	*
22	15528141	15529255	100893	1.77631e-09	*
10	5485939	5486614	8528	1.79439e-09	*
24	5000830	5002720	111876	1.83314e-09	*
23	23322234	23322737	107010	1.84531e-09	*
1	2134026	2134484	406	1.87501e-09	*
23	24353261	24353733	107252	1.87911e-09	*
10	3278189	3278913	8182	1.88231e-09	*
4	13991831	13992777	132688	1.88259e-09	*
2	28484861	28485283	81073	1.89214e-09	*
7	65738173	65738887	162510	1.90175e-09	*
20	48209324	48210102	91863	1.90368e-09	*
17	5291464	5292352	56608	1.91296e-09	*
2	25185077	25186165	80550	1.96864e-09	*
15	8917659	8918799	42954	1.9821e-09	*
21	308316	309572	92691	2.05143e-09	*
20	23731372	23732908	88164	2.06127e-09	*
11	41876755	41877147	19704	2.08637e-09	*
13	18924344	18925031	29489	2.09308e-09	*
24	4165379	4166468	111620	2.09308e-09	*
13	46309034	46309819	33705	2.09308e-09	*
1	7778930	7779312	1284	2.09648e-09	*
5	52436378	52437091	142878	2.12098e-09	*
16	30655170	30656786	52619	2.12668e-09	*
16	29543459	29544790	52423	2.1733e-09	*
13	17397232	17398364	29244	2.19498e-09	*
20	39283552	39284036	90786	2.19909e-09	*
4	14000549	14001324	132692	2.19909e-09	*
3	18108837	18110636	123522	2.25667e-09	*
9	6484813	6485756	171979	2.27677e-09	*
14	40341712	40342760	40299	2.28034e-09	*
7	61186397	61187065	162087	2.28034e-09	*
16	16748726	16749681	50783	2.28034e-09	*
6	24432551	24433729	148142	2.32146e-09	*
20	37586779	37587754	90498	2.32649e-09	*
10	31141641	31142363	11792	2.33699e-09	*
14	28135059	28135636	38102	2.34069e-09	*
24	23260450	23262762	114183	2.34419e-09	*
1	46351967	46352472	5845	2.37413e-09	*
11	44778085	44778753	20262	2.37544e-09	*
6	31806883	31807539	149320	2.39793e-09	*
15	24892576	24894129	44839	2.40307e-09	*
7	22930948	22932141	155911	2.40799e-09	*
6	26958808	26959745	148541	2.41627e-09	*
18	19754901	19755986	66376	2.44082e-09	*
25	29624291	29625247	120503	2.4513e-09	*
14	38717696	38718559	39956	2.45141e-09	*
3	12297938	12299247	122634	2.45973e-09	*
KN150074.1	6472	7325	179909	2.49985e-09	*
15	31780896	31781509	46157	2.50208e-09	*
24	35636624	35638017	116017	2.50288e-09	*
18	554442	555495	63469	2.52225e-09	*
13	13529118	13529686	28788	2.53252e-09	*
24	9348232	9348849	112525	2.53252e-09	*
3	25295257	25295861	124773	2.53252e-09	*
6	44341462	44343070	151164	2.54016e-09	*
14	45113575	45114130	40981	2.54308e-09	*
14	35379913	35380671	39424	2.57129e-09	*
6	36701164	36701636	150057	2.63071e-09	*
13	40789023	40790128	33033	2.66476e-09	*
20	15353794	15354874	86964	2.66754e-09	*
24	19326993	19328490	113559	2.6843e-09	*
5	16234609	16235171	137492	2.6843e-09	*
19	30935024	30935761	74913	2.69012e-09	*
23	32492251	32493155	108727	2.69012e-09	*
13	46568703	46569497	33768	2.69393e-09	*
15	14529251	14530436	43407	2.76224e-09	*
KN150131.1	58502	59395	180063	2.76629e-09	*
4	9409661	9410346	131732	2.77892e-09	*
23	46069853	46071181	110722	2.79098e-09	*
15	24614027	24615628	44785	2.79901e-09	*
19	22497638	22500114	73732	2.79901e-09	*
11	7927953	7928559	15071	2.80801e-09	*
9	50079587	50080665	178282	2.82289e-09	*
25	36512156	36513760	121513	2.8302e-09	*
20	14843506	14844680	86885	2.8302e-09	*
7	35877485	35878503	158435	2.90182e-09	*
15	21334323	21335570	44240	2.90182e-09	*
13	17088105	17088528	29159	2.9704e-09	*
11	26721662	26722271	17549	2.9704e-09	*
10	13544629	13545251	9467	2.97257e-09	*
18	25934443	25935710	67516	2.97257e-09	*
18	12910711	12911424	65284	2.97999e-09	*
18	15526592	15526989	65672	2.99473e-09	*
25	31404857	31405552	120710	3.0193e-09	*
24	1758647	1759279	111130	3.02009e-09	*
15	25466189	25467011	44964	3.08599e-09	*
2	10362620	10363854	79041	3.08881e-09	*
5	17639406	17640923	137709	3.11558e-09	*
1	48253235	48253768	6202	3.12838e-09	*
11	27871997	27872541	17743	3.1713e-09	*
12	9373900	9374258	21778	3.1713e-09	*
16	51230210	51230578	55577	3.17795e-09	*
22	10791298	10791958	100118	3.23456e-09	*
19	2230453	2231566	71232	3.25795e-09	*
KN150342.1	58762	61445	180476	3.25795e-09	*
13	46338815	46339929	33715	3.26407e-09	*
2	46260509	46261013	83713	3.27119e-09	*
6	25337704	25338574	148316	3.28946e-09	*
15	24902057	24902882	44843	3.28946e-09	*
20	20423214	20424175	87539	3.32272e-09	*
16	21628765	21629524	51287	3.33006e-09	*
15	6459677	6460456	42683	3.36307e-09	*
13	22558806	22559970	29959	3.36307e-09	*
5	42019714	42020707	141482	3.36381e-09	*
17	1152845	1153589	56259	3.36381e-09	*
18	44074708	44075858	69479	3.43769e-09	*
2	8327788	8328730	78842	3.43947e-09	*
11	5416606	5417907	14734	3.50402e-09	*
11	1874275	1874826	14130	3.50912e-09	*
15	20317615	20318339	44086	3.51651e-09	*
7	37199753	37200542	158724	3.55314e-09	*
23	23328865	23329992	107013	3.56184e-09	*
3	47194976	47195427	127927	3.57341e-09	*
16	21094864	21096358	51222	3.59346e-09	*
6	55950858	55951825	152802	3.59346e-09	*
5	63116826	63117521	143927	3.59653e-09	*
25	30941692	30942685	120634	3.65084e-09	*
1	46493394	46494270	5871	3.65084e-09	*
20	14874530	14878109	86893	3.67838e-09	*
11	26634471	26635081	17526	3.6812e-09	*
13	48409195	48410203	33994	3.69791e-09	*
20	37037349	37038100	90422	3.72536e-09	*
4	2710341	2711232	130348	3.76398e-09	*
7	24735751	24737126	156193	3.79249e-09	*
2	45059515	45060057	83560	3.7972e-09	*
5	67420103	67420578	144462	3.80651e-09	*
23	25638691	25639687	107461	3.81106e-09	*
23	1973158	1973670	104269	3.81324e-09	*
20	18519018	18520074	87309	3.81324e-09	*
18	27669238	27670065	67725	3.87177e-09	*
25	12614778	12615245	118651	3.87921e-09	*
6	54638016	54638709	152641	3.88039e-09	*
23	45450787	45451740	110618	3.89107e-09	*
14	31221009	31222250	38604	3.90035e-09	*
3	14043798	14045327	122888	3.91268e-09	*
11	25999955	26000374	17406	3.91682e-09	*
22	25834385	25835801	102489	3.92016e-09	*
23	33575682	33576362	108968	3.94891e-09	*
3	6639596	6640249	122120	3.95166e-09	*
7	16929471	16930097	154987	3.95947e-09	*
14	31986781	31988758	38724	3.95947e-09	*
11	4235195	4236047	14520	3.9713e-09	*
23	19086043	19087148	106311	3.98512e-09	*
17	52289225	52289899	63100	3.98512e-09	*
20	45288924	45289588	91508	4.03199e-09	*
22	37804945	37805492	103781	4.06963e-09	*
11	21902119	21903728	16660	4.09706e-09	*
19	1965521	1966536	71157	4.1086e-09	*
16	19758487	19759175	51034	4.1086e-09	*
12	27194886	27197759	23737	4.11643e-09	*
3	32858748	32860050	126024	4.13229e-09	*
6	28808325	28809251	148817	4.13891e-09	*
17	29058677	29059530	60145	4.17338e-09	*
24	8055970	8057250	112335	4.17338e-09	*
2	35922618	35924972	82194	4.22842e-09	*
21	28632175	28632932	96876	4.2303e-09	*
4	889277	890312	130003	4.25948e-09	*
2	11754749	11757391	79168	4.28469e-09	*
23	24067421	24070647	107205	4.31298e-09	*
2	47384200	47384703	83886	4.42442e-09	*
15	1516544	1517211	42073	4.43012e-09	*
18	24587747	24588407	67285	4.43224e-09	*
2	3985755	3986239	78328	4.43324e-09	*
2	17873047	17874622	79652	4.4916e-09	*
5	30245829	30247975	139583	4.54655e-09	*
25	31323433	31324325	120695	4.55201e-09	*
8	10323119	10324332	165036	4.55201e-09	*
5	56571576	56571966	143207	4.55201e-09	*
22	33169431	33173441	103161	4.58609e-09	*
21	16910313	16910770	95029	4.58609e-09	*
3	6626655	6627333	122118	4.60197e-09	*
24	9472647	9473386	112549	4.64671e-09	*
13	18600567	18601246	29441	4.64757e-09	*
21	38139188	38140537	97929	4.66315e-09	*
18	34918904	34920350	68300	4.78677e-09	*
12	25975846	25976824	23505	4.80878e-09	*
9	9221235	9222139	172394	4.81604e-09	*
19	15440950	15443626	72990	4.82266e-09	*
25	1914294	1914830	117259	4.89973e-09	*
7	35717539	35718250	158394	4.90243e-09	*
1	39468709	39471018	4906	4.90857e-09	*
5	44916773	44917791	141874	4.91334e-09	*
20	1653166	1654045	85498	4.93229e-09	*
2	49267880	49269575	84130	5.07253e-09	*
9	13881078	13881744	173008	5.11063e-09	*
1	50001758	50002257	6415	5.13818e-09	*
7	43809048	43811140	159800	5.15005e-09	*
10	4711456	4712705	8424	5.17412e-09	*
13	17332238	17333209	29226	5.17412e-09	*
17	49977967	49979312	62755	5.2261e-09	*
21	38153444	38154119	97934	5.22985e-09	*
2	10354601	10355150	79039	5.34849e-09	*
22	21467486	21469039	101970	5.42641e-09	*
25	2320825	2321936	117320	5.45156e-09	*
20	30797095	30797986	89408	5.46431e-09	*
3	23182450	23183361	124327	5.54384e-09	*
23	31114570	31115422	108464	5.58257e-09	*
18	47180775	47182874	69976	5.61755e-09	*
KN150425.1	59299	60169	180614	5.6863e-09	*
9	8436429	8437752	172267	5.68945e-09	*
13	1616104	1616935	27196	5.69563e-09	*
17	12467432	12467850	57563	5.75162e-09	*
5	17710434	17711310	137733	5.79126e-09	*
11	24532582	24533721	17156	5.8003e-09	*
4	8251831	8252418	131441	5.8003e-09	*
8	41317771	41319128	169355	5.8003e-09	*
1	5230096	5230987	824	5.8215e-09	*
13	46070023	46071469	33652	5.85672e-09	*
19	31848785	31849653	75083	5.86091e-09	*
11	3410394	3410996	14368	5.86091e-09	*
5	27537139	27538176	139174	5.91044e-09	*
17	17986663	17987508	58331	5.91044e-09	*
4	17088681	17089963	133428	5.9402e-09	*
4	15830224	15831876	133142	5.94476e-09	*
11	23479507	23480284	16941	5.95457e-09	*
3	53581336	53581773	128561	6.04021e-09	*
23	10050342	10051605	105364	6.10202e-09	*
19	3693204	3693878	71509	6.10428e-09	*
6	2018516	2019378	145603	6.13134e-09	*
24	4826550	4828600	111817	6.18198e-09	*
18	23542484	23543290	67049	6.45035e-09	*
5	24369613	24371835	138687	6.46737e-09	*
18	20343279	20344346	66509	6.48251e-09	*
23	1968440	1969167	104267	6.49867e-09	*
16	7773362	7774466	49840	6.54898e-09	*
1	27174069	27176024	3606	6.57617e-09	*
12	8776256	8778461	21694	6.59014e-09	*
16	46217479	46218019	54965	6.61809e-09	*
15	3512421	3513202	42357	6.6609e-09	*
17	35809345	35810567	61259	6.66099e-09	*
18	20097342	20098067	66444	6.70015e-09	*
9	8415401	8416151	172261	6.76711e-09	*
6	52706572	52707454	152325	6.76744e-09	*
21	17319299	17320643	95108	6.77101e-09	*
9	31783826	31784107	175647	6.8647e-09	*
20	22670822	22671388	87956	6.8647e-09	*
23	15157222	15158137	105863	6.86986e-09	*
3	54717142	54719274	128706	6.87172e-09	*
20	18447260	18448225	87291	6.8797e-09	*
19	14062962	14064704	72838	6.97008e-09	*
2	22828442	22829379	80249	6.97008e-09	*
20	22666287	22667187	87954	6.98806e-09	*
23	36022818	36025837	109398	7.01612e-09	*
22	38068221	38069013	103804	7.15303e-09	*
15	27079594	27080120	45209	7.22504e-09	*
22	24402867	24404090	102409	7.22504e-09	*
17	52866133	52868252	63197	7.23242e-09	*
23	10325259	10326579	105416	7.31451e-09	*
13	10197923	10199692	28370	7.32259e-09	*
15	41981917	41983000	47805	7.37322e-09	*
18	37067577	37068313	68539	7.37704e-09	*
11	28272143	28274683	17817	7.43281e-09	*
15	33545265	33546438	46467	7.4458e-09	*
4	16405158	16407591	133244	7.57635e-09	*
24	4319414	4320678	111672	7.60763e-09	*
5	5912907	5913502	136321	7.62175e-09	*
8	46105687	46106169	169809	7.62655e-09	*
17	28069281	28070815	60024	7.82176e-09	*
10	38248931	38250009	12863	7.88063e-09	*
20	20383550	20384918	87532	7.95423e-09	*
12	7702568	7704127	21491	7.95423e-09	*
13	42145001	42145652	33154	8.0028e-09	*
21	20525700	20526636	95674	8.12033e-09	*
21	6482617	6483332	93657	8.26524e-09	*
7	19368581	19369255	155294	8.29335e-09	*
4	12006272	12008257	132277	8.34304e-09	*
20	45811519	45812728	91568	8.35773e-09	*
13	1505241	1507083	27185	8.39038e-09	*
19	46483371	46484181	77355	8.44506e-09	*
5	7695670	7697372	136509	8.44506e-09	*
3	21821964	21822850	124055	8.47441e-09	*
18	20968876	20970690	66626	8.49691e-09	*
20	19337742	19338448	87419	8.50255e-09	*
19	31851154	31852795	75084	8.58921e-09	*
23	20216712	20217254	106465	8.58921e-09	*
13	50072769	50073502	34291	8.60033e-09	*
16	19840054	19841177	51045	8.62639e-09	*
7	53822454	53823773	161211	8.6987e-09	*
11	25927456	25928155	17390	8.82473e-09	*
17	32571257	32571963	60718	8.99076e-09	*
22	16963824	16964426	101211	9.0319e-09	*
7	29861521	29862061	157148	9.04089e-09	*
2	33382138	33383602	81833	9.04089e-09	*
16	46063182	46063517	54950	9.09922e-09	*
12	31073664	31076308	24358	9.24663e-09	*
3	60768521	60769200	129477	9.28029e-09	*
23	21536974	21538761	106643	9.28029e-09	*
13	16827293	16828134	29101	9.31149e-09	*
KN149739.1	45857	46966	179209	9.33894e-09	*
8	46176507	46177162	169814	9.36708e-09	*
22	12512103	12513698	100483	9.42025e-09	*
13	7945149	7946935	28135	9.43125e-09	*
12	5707920	5709959	21271	9.43125e-09	*
7	36006462	36008305	158475	9.43125e-09	*
10	42609654	42610421	13379	9.64798e-09	*
3	47192384	47192969	127926	9.72948e-09	*
10	17442100	17442758	9871	9.78676e-09	*
12	10919953	10920895	21934	9.9603e-09	*
20	11346798	11347973	86670	9.98309e-09	*
18	19616578	19617039	66336	1.02465e-08	*
6	15812473	15813388	147522	1.02465e-08	*
2	35914024	35915186	82191	1.02858e-08	*
18	22658037	22658468	66876	1.03357e-08	*
6	6526260	6527474	146308	1.03941e-08	*
12	30134892	30135782	24187	1.04039e-08	*
5	64830848	64831541	144153	1.04039e-08	*
9	21951579	21952767	174106	1.04281e-08	*
19	23183897	23184798	73808	1.04281e-08	*
13	10172682	10173684	28364	1.04442e-08	*
14	17453846	17455016	36686	1.0513e-08	*
21	32698094	32698862	97322	1.05445e-08	*
18	25924507	25925162	67513	1.05562e-08	*
20	29404174	29404951	89143	1.05562e-08	*
18	22644359	22645748	66873	1.06401e-08	*
22	3638557	3639298	99440	1.07233e-08	*
17	28019779	28020431	60013	1.07278e-08	*
22	35674789	35675305	103402	1.08035e-08	*
10	4152835	4154615	8348	1.08142e-08	*
8	22312290	22312865	166915	1.09552e-08	*
8	38096774	38097366	169080	1.09575e-08	*
5	44889177	44889710	141865	1.09734e-08	*
13	46295018	46296537	33702	1.09743e-08	*
11	23454198	23455953	16933	1.09743e-08	*
2	522681	523260	77858	1.09743e-08	*
12	2939555	2940619	20933	1.10971e-08	*
22	17677463	17679439	101334	1.12e-08	*
21	20528801	20529682	95676	1.1262e-08	*
25	33666386	33667269	121046	1.1262e-08	*
2	23247973	23248606	80308	1.1262e-08	*
20	25305009	25305640	88437	1.14289e-08	*
5	52071673	52073149	142800	1.14356e-08	*
6	33245494	33246880	149578	1.14356e-08	*
24	5137553	5138331	111910	1.15927e-08	*
2	21685137	21686089	80068	1.16026e-08	*
6	31906709	31907536	149348	1.16229e-08	*
11	26788373	26789435	17566	1.16229e-08	*
20	7568980	7570185	86205	1.16601e-08	*
9	47153393	47154229	177955	1.17221e-08	*
21	37123514	37124494	97753	1.18118e-08	*
12	38003531	38004713	25611	1.19118e-08	*
3	46319278	46319838	127834	1.19644e-08	*
6	32726225	32727150	149499	1.21354e-08	*
12	6438768	6439648	21366	1.21831e-08	*
14	35120344	35122345	39351	1.21993e-08	*
22	14045090	14045994	100736	1.22081e-08	*
5	1394343	1395918	135825	1.22493e-08	*
9	16152309	16152772	173328	1.24508e-08	*
2	36975900	36976553	82287	1.25707e-08	*
18	46353491	46354633	69850	1.25707e-08	*
24	39089128	39089911	116439	1.28591e-08	*
21	3700020	3700459	93266	1.28651e-08	*
20	30881919	30882385	89436	1.2935e-08	*
7	47040455	47041800	160309	1.2935e-08	*
20	39319731	39320492	90788	1.2935e-08	*
11	41024097	41025577	19574	1.30064e-08	*
14	3262477	3263746	35226	1.30064e-08	*
7	14053726	14055166	154575	1.30357e-08	*
14	30389929	30390793	38432	1.30887e-08	*
25	25464466	25465234	120230	1.31484e-08	*
21	17842546	17843536	95232	1.31837e-08	*
21	14338495	14339990	94696	1.32027e-08	*
16	30649410	30650399	52617	1.32303e-08	*
1	2126450	2127161	404	1.32684e-08	*
18	40244445	40245598	68951	1.33116e-08	*
25	31307773	31309133	120693	1.33749e-08	*
6	50600264	50601445	152017	1.34458e-08	*
1	46815567	46816424	5943	1.34876e-08	*
7	36310240	36311304	158551	1.36095e-08	*
23	28293828	28296201	107943	1.36305e-08	*
15	3334560	3335108	42320	1.36513e-08	*
7	46621306	46621846	160222	1.37327e-08	*
22	3624887	3625728	99434	1.37327e-08	*
25	2162078	2162891	117288	1.39832e-08	*
7	70667130	70671199	163231	1.40011e-08	*
7	44835103	44835565	159969	1.40261e-08	*
7	35625479	35626458	158365	1.41641e-08	*
10	43681744	43682038	13532	1.42229e-08	*
2	39875687	39876525	82715	1.45182e-08	*
15	29241352	29242789	45696	1.46776e-08	*
10	27105988	27106585	11088	1.4902e-08	*
25	10782002	10783361	118427	1.4902e-08	*
2	31418859	31420252	81477	1.49338e-08	*
17	1406735	1407755	56290	1.49589e-08	*
16	20968043	20968757	51190	1.49589e-08	*
25	2622468	2623695	117378	1.4968e-08	*
6	52681665	52682948	152317	1.49816e-08	*
23	20902338	20902965	106568	1.50445e-08	*
20	15187925	15188782	86937	1.50825e-08	*
3	54692278	54693302	128698	1.51597e-08	*
11	41971864	41972319	19720	1.53257e-08	*
12	2964353	2965086	20935	1.53686e-08	*
14	31068050	31068702	38566	1.54115e-08	*
12	836095	836968	20593	1.54683e-08	*
20	7617135	7618327	86211	1.5481e-08	*
24	10556598	10557536	112675	1.5622e-08	*
KN150565.1	14482	15235	180872	1.5622e-08	*
16	33739092	33739703	53153	1.56613e-08	*
20	8737772	8738351	86413	1.58616e-08	*
11	28575180	28576050	17894	1.58793e-08	*
7	46329476	46329952	160147	1.58793e-08	*
17	38067982	38069294	61608	1.58965e-08	*
23	22585006	22585500	106799	1.59014e-08	*
12	17726513	17727753	22399	1.59095e-08	*
20	21523377	21524329	87762	1.59276e-08	*
9	16515425	16517131	173410	1.60586e-08	*
17	38212759	38213645	61646	1.6165e-08	*
2	4761648	4762225	78431	1.62976e-08	*
16	19754469	19755198	51032	1.63499e-08	*
5	7680692	7681380	136506	1.64287e-08	*
12	30279111	30279505	24219	1.65766e-08	*
11	21246174	21247027	16482	1.65766e-08	*
15	36213024	36213634	46925	1.66332e-08	*
15	35645901	35646503	46841	1.6657e-08	*
3	43740442	43742198	127609	1.66709e-08	*
10	922515	923566	7841	1.6856e-08	*
12	27457241	27458420	23797	1.71054e-08	*
5	39281267	39282042	141017	1.71275e-08	*
20	1223792	1224405	85424	1.72014e-08	*
8	19775863	19778308	166545	1.77421e-08	*
6	8010654	8011540	146531	1.77495e-08	*
6	15602309	15604509	147477	1.77574e-08	*
23	36450380	36451117	109521	1.78178e-08	*
25	2638380	2639221	117382	1.81868e-08	*
9	37253264	37253964	176538	1.8398e-08	*
23	10315430	10316543	105413	1.8421e-08	*
2	25443642	25444612	80629	1.84711e-08	*
20	14824906	14826107	86883	1.85895e-08	*
12	5119367	5120666	21179	1.86786e-08	*
16	26600632	26602087	51967	1.86925e-08	*
24	35662149	35663136	116024	1.86925e-08	*
18	43112492	43113440	69336	1.87071e-08	*
1	54398835	54399888	7110	1.88393e-08	*
17	34201750	34202858	60964	1.89852e-08	*
16	4433536	4434552	49343	1.92224e-08	*
15	25793289	25793758	45034	1.94813e-08	*
11	22047736	22048438	16716	1.96586e-08	*
6	59475973	59476398	153232	1.96675e-08	*
21	37972169	37972913	97899	1.97143e-08	*
20	36584138	36584782	90348	1.97487e-08	*
15	8922237	8922956	42955	1.97998e-08	*
8	37985189	37986061	169053	1.98395e-08	*
KN149707.2	6251	7446	179106	1.98395e-08	*
13	46058699	46059240	33646	2.00229e-08	*
5	43682443	43683505	141653	2.00767e-08	*
9	18762550	18763287	173664	2.01269e-08	*
15	3879495	3880071	42438	2.01573e-08	*
10	27411972	27412665	11182	2.01573e-08	*
KN150131.1	49198	49818	180062	2.02244e-08	*
11	10877943	10878644	15392	2.04577e-08	*
16	46276743	46277224	54982	2.04703e-08	*
14	28051900	28053413	38086	2.05766e-08	*
3	50864921	50865486	128262	2.05766e-08	*
6	2951027	2952329	145760	2.05959e-08	*
4	12897427	12898191	132469	2.06886e-08	*
20	45460487	45461592	91530	2.06886e-08	*
23	26327422	26328519	107565	2.08832e-08	*
20	20502379	20503162	87562	2.09592e-08	*
20	30791443	30792052	89405	2.12041e-08	*
1	57377920	57379421	7375	2.12947e-08	*
23	25730273	25731154	107482	2.13096e-08	*
22	13977555	13978390	100723	2.13512e-08	*
10	42628278	42629855	13385	2.1381e-08	*
10	29649069	29649621	11640	2.1381e-08	*
20	14829579	14830142	86884	2.14591e-08	*
15	33527358	33528619	46461	2.16616e-08	*
21	43319238	43319667	98495	2.18364e-08	*
21	9483987	9484635	93949	2.19179e-08	*
11	36975394	36976279	19028	2.20869e-08	*
11	16318647	16319303	15868	2.23674e-08	*
6	15785591	15786512	147514	2.24545e-08	*
10	13378832	13380528	9439	2.24545e-08	*
19	22561905	22562594	73747	2.24934e-08	*
1	58956380	58957924	7507	2.25029e-08	*
8	2998628	2999236	164090	2.26906e-08	*
19	26534278	26535128	74251	2.26906e-08	*
17	49677404	49678290	62714	2.26906e-08	*
17	35773856	35774468	61251	2.26906e-08	*
14	8503583	8505354	35997	2.31096e-08	*
22	15657623	15660971	100932	2.31413e-08	*
5	52155080	52155702	142828	2.33286e-08	*
3	54715318	54716302	128705	2.34817e-08	*
9	15411907	15412671	173302	2.35909e-08	*
13	13366921	13368158	28764	2.37399e-08	*
23	36280381	36281422	109480	2.39023e-08	*
17	38169333	38170475	61632	2.3928e-08	*
11	43539982	43540691	20000	2.40965e-08	*
2	25429349	25430397	80624	2.42135e-08	*
15	41967246	41967762	47802	2.43463e-08	*
7	20427167	20427824	155448	2.44006e-08	*
8	48335519	48336581	170084	2.47371e-08	*
15	35551028	35551330	46812	2.50129e-08	*
6	54573226	54573802	152624	2.50135e-08	*
9	30667210	30668750	175391	2.50135e-08	*
7	39861729	39863441	159217	2.50299e-08	*
11	21041692	21042291	16437	2.51245e-08	*
5	65762879	65763651	144252	2.51969e-08	*
19	3006060	3007336	71375	2.52544e-08	*
9	13437011	13437666	172949	2.52544e-08	*
24	21273818	21275262	113871	2.52544e-08	*
19	41807599	41808316	76681	2.52688e-08	*
25	1904444	1905448	117257	2.52829e-08	*
20	1635744	1637098	85492	2.5466e-08	*
11	25797745	25799878	17364	2.55962e-08	*
5	34412148	34413203	140243	2.56692e-08	*
9	37573649	37574544	176587	2.56923e-08	*
2	32033613	32034167	81559	2.57384e-08	*
17	21025547	21026036	58814	2.58936e-08	*
3	24105804	24106490	124579	2.59704e-08	*
24	23268199	23269588	114185	2.6167e-08	*
25	423021	423932	116996	2.62362e-08	*
3	48481474	48482920	128098	2.63368e-08	*
23	37020980	37021693	109609	2.63891e-08	*
20	1812102	1813186	85535	2.68057e-08	*
7	9904047	9904715	154107	2.68057e-08	*
23	10175993	10178258	105391	2.68279e-08	*
10	10894602	10895460	9172	2.69848e-08	*
25	8557156	8557895	118180	2.70597e-08	*
10	32187165	32187995	12031	2.7668e-08	*
19	7549291	7550559	72059	2.77286e-08	*
2	40521526	40522099	82851	2.77286e-08	*
17	9877348	9878017	57128	2.83078e-08	*
24	38812846	38814716	116387	2.83127e-08	*
5	36215861	36216847	140559	2.84253e-08	*
20	538068	538768	85351	2.847e-08	*
23	5530709	5531408	104795	2.85003e-08	*
22	4665914	4666726	99578	2.85646e-08	*
7	48876477	48877041	160558	2.85646e-08	*
9	38014013	38014921	176655	2.87235e-08	*
5	13276999	13277803	136995	2.87508e-08	*
5	24340443	24342611	138679	2.89788e-08	*
KN150641.1	11511	12384	181049	2.9063e-08	*
25	2828485	2829327	117416	2.92571e-08	*
5	44526138	44527512	141783	2.93756e-08	*
10	27522224	27522905	11218	2.9575e-08	*
15	3908008	3908663	42445	2.96829e-08	*
11	25242834	25243860	17271	2.96927e-08	*
5	41944705	41946348	141467	2.97358e-08	*
5	13263580	13264413	136993	2.98957e-08	*
20	43287296	43288464	91270	2.98973e-08	*
12	42542899	42544104	26051	2.98973e-08	*
1	5523819	5524859	891	2.99749e-08	*
5	68494889	68496495	144615	2.99984e-08	*
2	25340258	25341118	80594	3.05279e-08	*
6	42721419	42722567	150786	3.07674e-08	*
7	30360759	30361277	157236	3.08599e-08	*
7	36918290	36919837	158657	3.10847e-08	*
23	23636870	23637686	107096	3.14618e-08	*
6	2051095	2053072	145615	3.17579e-08	*
21	22827412	22828701	95984	3.18468e-08	*
10	38384552	38385940	12899	3.19228e-08	*
5	49550273	49551396	142441	3.20504e-08	*
10	34338378	34338876	12312	3.21289e-08	*
4	21637423	21638248	134317	3.22246e-08	*
22	3691877	3692912	99455	3.22376e-08	*
19	21072297	21073553	73509	3.24258e-08	*
21	3432018	3434239	93216	3.25584e-08	*
KN150493.1	8426	8965	180736	3.27401e-08	*
13	27509427	27510252	30808	3.28013e-08	*
20	15014561	15016357	86912	3.30035e-08	*
17	27637884	27639135	59927	3.31429e-08	*
1	47572784	47573394	6106	3.31595e-08	*
20	44492458	44492913	91400	3.36142e-08	*
25	11341769	11342742	118511	3.36986e-08	*
9	44780882	44781664	177580	3.37504e-08	*
7	38901272	38901979	159058	3.41267e-08	*
4	8249921	8250757	131440	3.41348e-08	*
18	26203358	26203908	67559	3.4254e-08	*
19	22252101	22253041	73694	3.46335e-08	*
12	23169696	23170202	22992	3.48351e-08	*
7	30711929	30712756	157327	3.5062e-08	*
1	2392181	2392465	466	3.5062e-08	*
6	36498369	36499512	150007	3.5062e-08	*
11	15619523	15620025	15798	3.51386e-08	*
5	43623317	43624617	141633	3.53049e-08	*
18	20176041	20177127	66465	3.53347e-08	*
15	8999984	9000712	42965	3.55229e-08	*
10	27296365	27297232	11148	3.56322e-08	*
9	30749617	30750303	175415	3.58356e-08	*
20	34433867	34434715	90025	3.60839e-08	*
5	280902	281613	135691	3.60924e-08	*
5	45334956	45336338	141929	3.6333e-08	*
9	16574580	16575124	173426	3.64814e-08	*
1	36605028	36605753	4450	3.72924e-08	*
10	32374600	32375655	12064	3.73713e-08	*
17	50526067	50527281	62808	3.75098e-08	*
19	25729752	25731503	74078	3.75377e-08	*
7	70857693	70858916	163260	3.75443e-08	*
11	34012578	34013583	18592	3.77385e-08	*
17	52953896	52955379	63225	3.80342e-08	*
9	38592597	38593461	176726	3.81339e-08	*
16	54875183	54875861	56081	3.81339e-08	*
6	4271847	4272623	145974	3.81339e-08	*
21	20584978	20586980	95694	3.81339e-08	*
15	47798227	47798843	48534	3.82306e-08	*
5	31504271	31504944	139802	3.82397e-08	*
23	38462516	38463158	109792	3.82877e-08	*
14	42148340	42149852	40578	3.8609e-08	*
5	49499144	49499774	142430	3.88767e-08	*
19	22620662	22621919	73760	3.91273e-08	*
KZ115993.1	12170	13258	181223	3.93635e-08	*
18	19100946	19102226	66257	3.93635e-08	*
16	28488196	28488876	52237	3.93742e-08	*
7	38914855	38915726	159062	3.9382e-08	*
21	16238710	16239371	94949	3.94135e-08	*
20	44484126	44484810	91399	3.94187e-08	*
18	34143166	34144029	68184	3.96883e-08	*
5	17598551	17599587	137698	3.97812e-08	*
24	26823534	26824597	114798	3.97975e-08	*
24	31250431	31250903	115466	3.98532e-08	*
1	19677844	19678597	2679	3.98532e-08	*
7	22940815	22942156	155915	3.9864e-08	*
7	4474194	4474972	153676	3.98664e-08	*
20	51562560	51563241	92232	3.99084e-08	*
15	24658219	24660148	44798	4.01391e-08	*
15	23987491	23988461	44672	4.02352e-08	*
16	30148468	30149053	52526	4.05869e-08	*
7	20268556	20269538	155423	4.06021e-08	*
16	2787630	2788253	49136	4.08156e-08	*
5	41364095	41364982	141397	4.08156e-08	*
9	43932516	43933166	177449	4.1294e-08	*
7	16866777	16867179	154970	4.13667e-08	*
25	2520018	2521073	117359	4.14403e-08	*
23	20831680	20832875	106537	4.17557e-08	*
18	25937286	25938471	67517	4.19698e-08	*
12	34287679	34288477	24881	4.20655e-08	*
10	16741979	16743258	9791	4.23222e-08	*
20	15232314	15233148	86946	4.24267e-08	*
22	16049657	16050671	101008	4.24267e-08	*
7	26897324	26898149	156602	4.26437e-08	*
12	16339228	16339603	22254	4.26437e-08	*
13	4745756	4746332	27660	4.29227e-08	*
20	39673483	39674188	90830	4.29359e-08	*
23	24717419	24718037	107324	4.29781e-08	*
9	14637336	14638394	173156	4.33328e-08	*
24	21292486	21293696	113877	4.33938e-08	*
12	3214571	3215602	20981	4.34135e-08	*
23	35857936	35858489	109352	4.34189e-08	*
8	12329693	12330483	165320	4.3523e-08	*
18	17852111	17853553	66061	4.3525e-08	*
11	386511	387091	13913	4.38685e-08	*
3	57128993	57129596	129053	4.43447e-08	*
20	41886662	41887345	91110	4.45133e-08	*
20	23602948	23603852	88133	4.45906e-08	*
7	49667820	49668865	160690	4.46267e-08	*
1	39552086	39555915	4933	4.46267e-08	*
20	20450787	20452625	87544	4.50457e-08	*
10	20415650	20417073	10160	4.52126e-08	*
1	13094617	13095027	1876	4.53584e-08	*
15	33511107	33512052	46455	4.54557e-08	*
16	14399837	14401031	50599	4.54675e-08	*
9	34997237	34998064	176216	4.54789e-08	*
17	51592360	51593240	62969	4.56539e-08	*
5	56711045	56711939	143236	4.57539e-08	*
9	23033063	23034063	174232	4.59456e-08	*
6	42749956	42751088	150794	4.60745e-08	*
9	42706931	42707989	177245	4.60885e-08	*
7	22937626	22938745	155914	4.63585e-08	*
13	11469596	11470491	28585	4.738e-08	*
17	35605651	35606839	61218	4.74428e-08	*
1	23927688	23928613	3120	4.79959e-08	*
19	6322118	6322822	71881	4.81665e-08	*
21	599090	599942	92748	4.83121e-08	*
9	8440203	8441138	172268	4.84597e-08	*
16	5268589	5269917	49439	4.85461e-08	*
18	25701470	25702131	67456	4.86002e-08	*
10	11701775	11702559	9311	4.88641e-08	*
16	19536373	19538707	51004	4.90443e-08	*
13	49222832	49223308	34151	4.91504e-08	*
14	5272982	5273403	35500	4.94174e-08	*
4	22607132	22607654	134465	4.9549e-08	*
23	10138297	10138831	105383	4.96346e-08	*
1	50790561	50791933	6521	4.96622e-08	*
5	15241997	15242716	137300	5.01126e-08	*
6	12134838	12135394	147037	5.01126e-08	*
20	25300893	25301818	88436	5.01126e-08	*
6	59492620	59493236	153235	5.01126e-08	*
1	650826	652167	147	5.01228e-08	*
20	48258022	48258733	91874	5.01228e-08	*
5	58950931	58951545	143471	5.01228e-08	*
8	41582565	41583595	169383	5.02665e-08	*
20	33403326	33404389	89860	5.04181e-08	*
8	38200822	38201696	169106	5.07126e-08	*
22	12435619	12439484	100463	5.07235e-08	*
15	8884594	8885474	42947	5.07517e-08	*
3	36990108	36991556	126733	5.09782e-08	*
3	60563864	60564219	129433	5.10417e-08	*
18	14893667	14894258	65592	5.14755e-08	*
17	4230944	4232787	56511	5.17054e-08	*
13	8843520	8845475	28255	5.17054e-08	*
9	21498659	21500885	174024	5.18422e-08	*
20	26247908	26248446	88548	5.18461e-08	*
11	1628399	1629417	14100	5.22461e-08	*
1	16427650	16428352	2274	5.25845e-08	*
15	29701009	29701921	45791	5.25995e-08	*
23	2480940	2481521	104358	5.29808e-08	*
24	19352092	19352762	113564	5.33762e-08	*
12	25340217	25341143	23365	5.33762e-08	*
14	24648725	24650295	37502	5.36597e-08	*
4	14494640	14495177	132810	5.39454e-08	*
25	5876589	5877748	117804	5.40496e-08	*
25	6578984	6580135	117941	5.4338e-08	*
23	6477066	6478207	104938	5.44373e-08	*
5	17956335	17956602	137783	5.46083e-08	*
9	8678565	8679216	172303	5.46083e-08	*
13	31622937	31624266	31590	5.46083e-08	*
24	27838413	27839496	114978	5.46925e-08	*
13	5100160	5100992	27719	5.49716e-08	*
6	27013403	27014483	148556	5.51587e-08	*
13	47893931	47894976	33922	5.54157e-08	*
24	4737183	4738468	111797	5.55725e-08	*
20	27231893	27232672	88771	5.5737e-08	*
6	54610995	54612071	152634	5.5737e-08	*
18	19724630	19725872	66368	5.57898e-08	*
3	50937401	50938312	128271	5.58817e-08	*
25	31300632	31301302	120690	5.63484e-08	*
7	26431960	26433015	156501	5.65464e-08	*
3	47190230	47190853	127925	5.6716e-08	*
12	42467944	42469820	26027	5.68057e-08	*
10	13427788	13428247	9447	5.72416e-08	*
22	15615983	15616687	100918	5.76081e-08	*
1	49225434	49226420	6283	5.76498e-08	*
3	41868286	41869388	127380	5.76498e-08	*
20	22620937	22621532	87946	5.76498e-08	*
6	27666842	27667690	148663	5.77284e-08	*
16	46263053	46264100	54978	5.80635e-08	*
3	41689405	41690568	127346	5.8188e-08	*
20	15443744	15444809	86979	5.85094e-08	*
5	16087398	16088208	137459	5.85709e-08	*
4	74836486	74837062	135389	5.87473e-08	*
10	4181523	4182385	8355	5.92003e-08	*
7	56854998	56855545	161708	5.94022e-08	*
24	20501148	20501701	113780	5.95326e-08	*
24	6107085	6109079	112074	5.95417e-08	*
14	17547395	17548567	36711	5.9555e-08	*
15	43422187	43422870	47978	5.97527e-08	*
10	4878388	4879427	8445	5.97786e-08	*
11	16432907	16433849	15898	5.9874e-08	*
8	33034699	33036471	168555	6.00261e-08	*
15	35395188	35396017	46764	6.01377e-08	*
9	37817356	37817784	176625	6.02252e-08	*
25	547517	548183	117017	6.03495e-08	*
2	45894356	45895153	83670	6.08348e-08	*
1	729160	729674	166	6.09214e-08	*
7	31589921	31591967	157533	6.11639e-08	*
22	36009168	36011858	103476	6.11971e-08	*
6	27451380	27452360	148618	6.12439e-08	*
12	163161	163561	20449	6.12439e-08	*
23	8636673	8637898	105175	6.13102e-08	*
7	73993936	73995035	163684	6.14418e-08	*
1	47460548	47461746	6082	6.14977e-08	*
7	65823994	65824918	162527	6.16114e-08	*
15	47752196	47752929	48517	6.17002e-08	*
19	28794047	28795475	74548	6.19985e-08	*
18	20387031	20388067	66522	6.20752e-08	*
9	6476220	6476905	171976	6.24723e-08	*
1	51533522	51534256	6675	6.25416e-08	*
7	51665479	51666135	160952	6.2889e-08	*
8	52184779	52185824	170574	6.2889e-08	*
14	33965740	33966329	39124	6.35436e-08	*
21	20675518	20676724	95717	6.39149e-08	*
18	5638251	5638853	64134	6.4026e-08	*
5	49717566	49718496	142483	6.41256e-08	*
11	11708887	11709252	15488	6.42617e-08	*
22	14253547	14254031	100763	6.42617e-08	*
23	45453334	45454890	110619	6.42853e-08	*
2	27437426	27438257	80901	6.43283e-08	*
7	36306931	36307760	158550	6.43633e-08	*
19	44013850	44014449	77018	6.44191e-08	*
14	15941563	15942344	36503	6.45507e-08	*
24	21299219	21300704	113879	6.46907e-08	*
16	19734753	19735991	51028	6.47267e-08	*
1	39276576	39277342	4849	6.51223e-08	*
18	46334574	46335601	69845	6.55022e-08	*
15	29610880	29611652	45763	6.55022e-08	*
14	35683349	35684161	39475	6.57404e-08	*
9	11486939	11488487	172655	6.5869e-08	*
9	33996314	33997828	176046	6.60579e-08	*
10	4717516	4719253	8426	6.60864e-08	*
24	15040527	15040925	113182	6.60864e-08	*
KN149893.1	18835	20083	179467	6.62711e-08	*
5	63972405	63973032	144044	6.70949e-08	*
13	48707929	48708917	34050	6.7097e-08	*
2	31368232	31368584	81462	6.74589e-08	*
23	31494638	31495681	108532	6.76037e-08	*
9	13384338	13385559	172939	6.7681e-08	*
1	49832440	49833981	6378	6.77171e-08	*
13	17154874	17156023	29179	6.7785e-08	*
7	26923843	26925453	156609	6.7785e-08	*
21	23524215	23525330	96107	6.80496e-08	*
3	47341776	47343109	127946	6.83151e-08	*
13	48853764	48853934	34078	6.84393e-08	*
12	3212030	3212701	20980	6.84872e-08	*
16	37948452	37949012	53720	6.84975e-08	*
7	35935629	35936920	158452	6.94001e-08	*
7	68298367	68300141	162840	6.94072e-08	*
11	25804015	25805624	17366	6.94924e-08	*
2	24853311	24854040	80499	6.98036e-08	*
6	21098999	21099294	147900	7.02334e-08	*
4	20806661	20807225	134119	7.03317e-08	*
9	11308221	11308997	172634	7.03425e-08	*
16	15378501	15379179	50681	7.05338e-08	*
7	46313844	46316135	160142	7.06183e-08	*
19	30845316	30846405	74894	7.0786e-08	*
17	37898299	37899009	61574	7.0786e-08	*
13	17494392	17494739	29266	7.08591e-08	*
7	73506146	73506912	163591	7.10518e-08	*
8	51510044	51510810	170485	7.1228e-08	*
6	27924827	27926423	148694	7.12475e-08	*
14	3251469	3252411	35222	7.12475e-08	*
10	42589278	42590215	13374	7.19677e-08	*
17	49081791	49082523	62671	7.19805e-08	*
7	48129600	48130307	160444	7.19805e-08	*
5	40509993	40511339	141243	7.25971e-08	*
7	65820260	65821314	162526	7.27498e-08	*
1	31793021	31793717	3941	7.28688e-08	*
7	8656155	8656866	153957	7.31522e-08	*
5	42016716	42017889	141481	7.32735e-08	*
8	9118474	9121467	164845	7.33738e-08	*
1	5342632	5343946	857	7.37142e-08	*
24	10585740	10586322	112681	7.39799e-08	*
5	49477551	49480315	142425	7.39799e-08	*
16	2760162	2760662	49129	7.43723e-08	*
4	857798	858555	129997	7.46282e-08	*
5	52081450	52082518	142803	7.46511e-08	*
7	50515928	50517187	160777	7.48212e-08	*
4	17409262	17410126	133523	7.48419e-08	*
23	46074932	46075640	110724	7.48419e-08	*
25	11129096	11129991	118462	7.52955e-08	*
4	14608870	14610666	132849	7.57623e-08	*
7	36974968	36975374	158672	7.58297e-08	*
11	8332808	8333379	15106	7.61503e-08	*
22	30853883	30854553	102910	7.6153e-08	*
1	24469189	24470712	3244	7.6153e-08	*
11	31348872	31349727	18218	7.62561e-08	*
20	30818572	30820343	89414	7.62805e-08	*
23	26892536	26892933	107665	7.63275e-08	*
21	44653887	44654424	98675	7.69183e-08	*
18	45966939	45967234	69781	7.69637e-08	*
13	14119899	14120959	28859	7.70353e-08	*
13	17404659	17405575	29247	7.76509e-08	*
9	18621638	18622417	173645	7.83992e-08	*
11	35859707	35860444	18907	7.85326e-08	*
25	6561134	6562158	117938	7.86758e-08	*
21	17749711	17750310	95202	7.89488e-08	*
9	21104080	21104546	173945	8.00196e-08	*
5	9830298	9831096	136704	8.00196e-08	*
2	4167076	4168112	78355	8.00196e-08	*
3	40013566	40014116	127073	8.0059e-08	*
17	835938	836997	56211	8.01006e-08	*
23	26026177	26026925	107532	8.01361e-08	*
22	38080271	38081418	103808	8.02221e-08	*
13	27136690	27137724	30746	8.03584e-08	*
8	19698481	19699147	166524	8.05207e-08	*
18	19657125	19657986	66347	8.11575e-08	*
22	21444006	21444612	101965	8.17643e-08	*
25	7388153	7389773	118058	8.20982e-08	*
1	51499371	51500225	6662	8.22594e-08	*
9	31425306	31425965	175596	8.23318e-08	*
9	50068419	50069450	178280	8.2708e-08	*
7	48606480	48607896	160521	8.2708e-08	*
KN149871.1	2754	3250	179443	8.27775e-08	*
20	17749886	17751116	87204	8.3312e-08	*
5	60517976	60519601	143609	8.33171e-08	*
10	14067473	14068560	9530	8.3784e-08	*
24	19954863	19955530	113695	8.40209e-08	*
20	15543379	15543869	87004	8.40613e-08	*
1	35731671	35733510	4300	8.48269e-08	*
10	43869848	43870437	13569	8.50259e-08	*
5	50477747	50478594	142646	8.58382e-08	*
12	42545351	42548925	26052	8.63978e-08	*
19	2037639	2038389	71178	8.66811e-08	*
1	47467160	47467526	6085	8.71946e-08	*
3	22753424	22754061	124246	8.71946e-08	*
19	32270612	32271442	75192	8.72093e-08	*
11	25806448	25811070	17367	8.7218e-08	*
21	28619297	28619811	96874	8.73792e-08	*
24	14801216	14802061	113160	8.75223e-08	*
7	68196248	68197169	162814	8.75223e-08	*
7	49663795	49664414	160687	8.75946e-08	*
18	44173536	44174496	69507	8.78071e-08	*
17	4065755	4067043	56488	8.78071e-08	*
12	5728071	5728967	21275	8.79416e-08	*
16	20741481	20743128	51147	8.79537e-08	*
8	9529827	9530274	164921	8.89644e-08	*
18	22106390	22107109	66749	8.89763e-08	*
12	41319259	41320026	25911	8.9653e-08	*
18	5641643	5642623	64135	8.98564e-08	*
16	53930147	53931192	55908	9.06876e-08	*
6	28801984	28802598	148815	9.07256e-08	*
24	19926091	19926868	113686	9.08384e-08	*
10	31212859	31213384	11810	9.11978e-08	*
9	25951569	25953001	174695	9.11978e-08	*
20	34366086	34367228	90012	9.1533e-08	*
17	38086612	38087419	61615	9.15343e-08	*
23	27216677	27217122	107734	9.15343e-08	*
6	31757394	31758354	149308	9.15926e-08	*
16	39775589	39776373	54050	9.31389e-08	*
8	10129481	10129891	164993	9.344e-08	*
23	29059957	29061295	108090	9.43289e-08	*
21	41103908	41105039	98222	9.48572e-08	*
15	27988987	27989740	45437	9.49231e-08	*
12	34221958	34222641	24870	9.55058e-08	*
16	48474910	48475454	55172	9.56425e-08	*
1	47284366	47284970	6039	9.6443e-08	*
13	3185824	3186944	27392	9.69132e-08	*
9	41885949	41886918	177121	9.69144e-08	*
17	35644223	35645083	61224	9.70712e-08	*
7	27855776	27856962	156826	9.78443e-08	*
24	35447866	35448681	115980	9.78528e-08	*
12	8388586	8389574	21613	9.79049e-08	*
8	46249728	46250091	169823	9.8189e-08	*
5	62538886	62539683	143834	9.82864e-08	*
11	30155619	30156338	18062	9.83215e-08	*
23	21717863	21718469	106662	9.87023e-08	*
20	28286344	28287067	88929	9.90868e-08	*
13	10093008	10094451	28347	9.90868e-08	*
4	20873646	20874430	134149	9.93931e-08	*
3	17212037	17212919	123365	9.95509e-08	*
4	6159268	6159756	131003	9.97381e-08	*
15	20255776	20256849	44070	9.98325e-08	*
11	44731379	44733489	20246	9.98325e-08	*
10	13547730	13548565	9468	9.98325e-08	*
5	52274703	52276516	142846	9.98325e-08	*
9	23150395	23152037	174264	9.98325e-08	*
8	51271743	51272296	170448	9.98325e-08	*
10	27407665	27411501	11181	1.00504e-07	*
20	35209271	35209618	90187	1.0119e-07	*
19	19617863	19618390	73323	1.02202e-07	*
7	53755961	53756953	161192	1.02793e-07	*
19	20092915	20093655	73395	1.03033e-07	*
KN150342.1	61989	64774	180477	1.03363e-07	*
5	34741906	34743613	140303	1.03489e-07	*
5	31760366	31762173	139854	1.03614e-07	*
2	23284668	23285608	80315	1.0389e-07	*
21	23657560	23658536	96146	1.04123e-07	*
8	51192563	51193106	170434	1.04125e-07	*
14	20465374	20465869	36905	1.04127e-07	*
2	33998781	33999442	81920	1.04152e-07	*
15	35270985	35271364	46738	1.04907e-07	*
20	45537414	45538042	91541	1.05067e-07	*
17	38195204	38195706	61640	1.05226e-07	*
25	15986530	15987274	119123	1.05368e-07	*
16	48457146	48457816	55169	1.0612e-07	*
2	16212443	16213017	79430	1.0612e-07	*
10	27269998	27271171	11140	1.0751e-07	*
21	30063980	30064856	96996	1.07574e-07	*
6	36706638	36707619	150059	1.08581e-07	*
12	27461796	27462967	23798	1.08708e-07	*
20	22892124	22893214	88004	1.08838e-07	*
15	18129685	18130956	43823	1.08926e-07	*
17	15060176	15061474	57899	1.09228e-07	*
16	4273728	4274795	49310	1.09228e-07	*
20	26707422	26708692	88652	1.09599e-07	*
15	35903248	35904129	46891	1.10177e-07	*
8	33966984	33968879	168740	1.10177e-07	*
12	30165418	30165913	24195	1.11012e-07	*
7	19134669	19136142	155273	1.11275e-07	*
12	36035142	36036230	25230	1.11275e-07	*
18	11040085	11040752	64912	1.11567e-07	*
11	45251678	45254081	20354	1.11665e-07	*
19	13850799	13851640	72811	1.11913e-07	*
12	17350983	17351899	22346	1.12484e-07	*
24	35631770	35632375	116016	1.125e-07	*
13	5330697	5331996	27776	1.12503e-07	*
7	53778197	53779124	161200	1.12503e-07	*
15	8250488	8251213	42833	1.12745e-07	*
6	53503573	53504126	152480	1.12761e-07	*
6	31880455	31881021	149341	1.12901e-07	*
16	7140023	7140868	49743	1.13028e-07	*
5	24335324	24339277	138678	1.13069e-07	*
5	64587643	64588381	144120	1.13148e-07	*
18	24087166	24087687	67193	1.13309e-07	*
1	47264537	47265144	6031	1.14303e-07	*
13	47976740	47977145	33942	1.1465e-07	*
10	20435829	20437160	10166	1.15048e-07	*
23	2474170	2475043	104356	1.15169e-07	*
12	27793747	27795368	23867	1.15456e-07	*
6	6236722	6237751	146263	1.15456e-07	*
13	30604187	30605412	31369	1.15632e-07	*
20	17734312	17734973	87200	1.15632e-07	*
24	4459742	4460632	111708	1.15834e-07	*
1	49868963	49869781	6390	1.15834e-07	*
6	29884292	29884639	149007	1.16366e-07	*
19	29795569	29796974	74723	1.16937e-07	*
20	1702868	1703324	85510	1.17276e-07	*
19	41383264	41384113	76599	1.17609e-07	*
16	8480710	8481607	49953	1.17609e-07	*
5	48861999	48862471	142294	1.17609e-07	*
21	5676066	5676871	93503	1.18117e-07	*
22	19598106	19599634	101643	1.18717e-07	*
23	39658388	39659521	109989	1.18717e-07	*
9	16606924	16607768	173434	1.19394e-07	*
10	42561781	42562557	13368	1.19399e-07	*
17	49650976	49652179	62709	1.19826e-07	*
16	27015260	27016074	52037	1.19852e-07	*
6	33419477	33420240	149613	1.19981e-07	*
23	33270890	33271771	108894	1.20717e-07	*
9	14574633	14575107	173141	1.20721e-07	*
10	35377306	35377776	12451	1.22012e-07	*
4	20834881	20835596	134134	1.22442e-07	*
22	11021622	11022403	100173	1.22785e-07	*
2	32047641	32048191	81563	1.22965e-07	*
20	304489	305958	85311	1.22965e-07	*
5	30008234	30009060	139543	1.22965e-07	*
13	35127275	35129269	32235	1.22965e-07	*
21	25763773	25767177	96492	1.2393e-07	*
11	31356815	31358870	18221	1.2407e-07	*
23	10469701	10470669	105446	1.24282e-07	*
7	16388167	16388641	154878	1.24634e-07	*
21	6423263	6424057	93645	1.24766e-07	*
19	35336964	35337570	75777	1.24877e-07	*
17	12586833	12587461	57586	1.25172e-07	*
22	493501	494121	99002	1.25186e-07	*
22	32997886	32998809	103133	1.25394e-07	*
4	14066979	14067432	132719	1.25394e-07	*
20	1696299	1698064	85508	1.25692e-07	*
19	41578280	41578928	76644	1.25989e-07	*
1	27042422	27043105	3566	1.26097e-07	*
KN150431.1	69000	69328	180648	1.26316e-07	*
7	32374438	32375170	157660	1.26825e-07	*
19	3660886	3661756	71499	1.26855e-07	*
24	13769171	13769694	112968	1.2714e-07	*
20	33336501	33337526	89840	1.27601e-07	*
10	37710219	37711422	12769	1.27601e-07	*
12	10812392	10813278	21915	1.28167e-07	*
24	34333384	34337195	115839	1.30396e-07	*
22	38440797	38441256	103858	1.30864e-07	*
13	35345250	35346858	32288	1.30864e-07	*
17	49061303	49061980	62668	1.30864e-07	*
11	2068766	2069654	14174	1.31019e-07	*
21	25524542	25525452	96450	1.3184e-07	*
6	56250570	56251242	152864	1.31997e-07	*
15	27146179	27146769	45227	1.32109e-07	*
19	2370806	2371805	71272	1.32627e-07	*
5	52497965	52498712	142893	1.32744e-07	*
6	44069079	44069613	151084	1.33046e-07	*
10	22803361	22803946	10524	1.33467e-07	*
23	6225756	6226423	104905	1.33547e-07	*
18	40353899	40358126	68971	1.33809e-07	*
22	4644225	4644826	99575	1.34147e-07	*
23	22734223	22735146	106839	1.35154e-07	*
21	17770907	17771802	95206	1.359e-07	*
21	15690122	15690911	94847	1.3735e-07	*
17	35712187	35712622	61241	1.37665e-07	*
15	33164501	33165452	46411	1.37742e-07	*
17	8407646	8408937	56882	1.38081e-07	*
25	34999183	34999615	121289	1.38331e-07	*
13	45065353	45065821	33502	1.38451e-07	*
16	1433241	1433977	48948	1.38485e-07	*
15	39294014	39294730	47396	1.39332e-07	*
11	10535167	10536014	15337	1.39332e-07	*
18	37066134	37066834	68538	1.40561e-07	*
12	46606041	46606797	26535	1.40561e-07	*
9	17505745	17506435	173515	1.40579e-07	*
7	34665077	34666610	158147	1.4154e-07	*
1	20137959	20138625	2740	1.4255e-07	*
3	24155826	24156586	124597	1.43252e-07	*
17	51548101	51548750	62962	1.4354e-07	*
22	18572830	18573925	101504	1.45378e-07	*
16	34043045	34043498	53196	1.45378e-07	*
6	47451345	47451634	151534	1.46053e-07	*
22	21420381	21421116	101959	1.48262e-07	*
2	37751461	37752739	82424	1.48648e-07	*
17	10305611	10306703	57181	1.4865e-07	*
2	39652661	39653921	82660	1.4921e-07	*
7	68360661	68363532	162857	1.4921e-07	*
24	5051720	5052251	111893	1.4921e-07	*
7	48990501	48991228	160575	1.49328e-07	*
3	40103037	40103527	127091	1.49645e-07	*
14	31189712	31190598	38596	1.51139e-07	*
7	38359507	38360763	158967	1.51618e-07	*
2	35566829	35567325	82102	1.51929e-07	*
22	14266945	14267635	100766	1.52328e-07	*
16	42345700	42346467	54465	1.52672e-07	*
13	5237019	5238001	27754	1.5314e-07	*
8	12307561	12308299	165314	1.53873e-07	*
23	23455003	23456065	107044	1.54459e-07	*
1	6043159	6043941	1028	1.57193e-07	*
16	14163049	14163500	50572	1.57564e-07	*
7	48656373	48656797	160531	1.579e-07	*
24	28891037	28893852	115154	1.57928e-07	*
7	70322999	70323807	163187	1.58814e-07	*
1	5776301	5776941	961	1.59997e-07	*
6	40657155	40658091	150545	1.60011e-07	*
24	35387204	35388064	115968	1.60317e-07	*
3	54724981	54727898	128709	1.61321e-07	*
10	45270217	45271322	13782	1.61545e-07	*
12	26016495	26017205	23520	1.62105e-07	*
1	17410238	17411188	2396	1.62627e-07	*
8	33019564	33021233	168550	1.63005e-07	*
11	18977133	18977640	16197	1.6374e-07	*
15	21803551	21804438	44340	1.64354e-07	*
11	28382219	28383193	17851	1.64473e-07	*
16	4440023	4441326	49344	1.64553e-07	*
3	3825777	3827185	121931	1.64575e-07	*
4	14011494	14012375	132696	1.64601e-07	*
15	41837589	41838769	47789	1.64857e-07	*
5	49402077	49402399	142406	1.64857e-07	*
5	39721496	39722492	141116	1.64975e-07	*
5	31874819	31875971	139882	1.64985e-07	*
17	49920437	49921420	62743	1.66184e-07	*
24	31164876	31166356	115441	1.66331e-07	*
24	1424006	1425419	111047	1.66363e-07	*
1	30247762	30248631	3779	1.664e-07	*
16	33769445	33769904	53159	1.66708e-07	*
2	52810630	52811172	84459	1.67396e-07	*
14	42669443	42670302	40643	1.67437e-07	*
10	13740835	13741374	9513	1.67437e-07	*
9	9814822	9815720	172456	1.68202e-07	*
8	19536543	19538144	166487	1.68303e-07	*
13	4517856	4518710	27624	1.70287e-07	*
14	31994683	31995337	38726	1.70581e-07	*
24	11034379	11035447	112757	1.70581e-07	*
25	8412814	8413469	118167	1.70581e-07	*
17	10989995	10990953	57298	1.70744e-07	*
5	36836962	36838370	140682	1.70806e-07	*
1	36210122	36210941	4391	1.71508e-07	*
9	37302787	37303395	176551	1.71876e-07	*
18	47173127	47174009	69974	1.71975e-07	*
1	51501542	51502549	6663	1.72911e-07	*
5	68442917	68444029	144600	1.74143e-07	*
19	21384741	21387115	73557	1.74937e-07	*
12	5312842	5313910	21215	1.74937e-07	*
8	9453355	9454053	164900	1.75613e-07	*
2	46301483	46302250	83723	1.76299e-07	*
20	13964339	13964630	86803	1.76497e-07	*
22	33101001	33102164	103144	1.76575e-07	*
24	4206095	4206858	111634	1.76812e-07	*
7	41243963	41245084	159449	1.76941e-07	*
13	29239839	29240409	31106	1.76961e-07	*
5	35090318	35091930	140383	1.77333e-07	*
19	32445454	32446261	75243	1.77654e-07	*
4	5542596	5543491	130882	1.77654e-07	*
4	14536054	14538101	132822	1.77654e-07	*
12	44898529	44899349	26371	1.77985e-07	*
21	20701567	20702322	95725	1.77985e-07	*
1	17376597	17377682	2383	1.77985e-07	*
6	14938218	14940367	147403	1.77985e-07	*
8	30805421	30806115	168311	1.78901e-07	*
12	20745761	20746237	22721	1.79196e-07	*
7	33512411	33513755	157898	1.79458e-07	*
13	31824098	31825410	31643	1.82615e-07	*
20	34847049	34848448	90122	1.83054e-07	*
19	28741003	28741714	74535	1.83054e-07	*
19	8491651	8496248	72190	1.83054e-07	*
22	22855415	22856367	102201	1.84235e-07	*
3	53622786	53623831	128570	1.84433e-07	*
25	1724145	1724611	117231	1.84716e-07	*
3	48485578	48486630	128099	1.84716e-07	*
KN150500.1	15529	16932	180747	1.84842e-07	*
5	13731919	13732262	137057	1.85025e-07	*
2	23208598	23208993	80302	1.85281e-07	*
3	33151052	33151543	126084	1.85281e-07	*
18	20932485	20933115	66612	1.8607e-07	*
12	45479490	45479870	26441	1.8607e-07	*
10	31175622	31176737	11803	1.86308e-07	*
11	43534796	43535063	19997	1.86955e-07	*
16	30116826	30118131	52519	1.87378e-07	*
9	4810132	4810911	171749	1.88237e-07	*
20	22013472	22014220	87841	1.89479e-07	*
17	14688024	14688715	57827	1.89503e-07	*
7	9566729	9567669	154074	1.90742e-07	*
6	48233007	48234156	151667	1.90742e-07	*
19	48101557	48101896	77688	1.91244e-07	*
23	29659536	29660483	108219	1.91759e-07	*
25	12888303	12889129	118701	1.9181e-07	*
14	24880416	24881778	37563	1.92298e-07	*
13	36031546	36032240	32391	1.92459e-07	*
3	47378823	47380191	127957	1.92884e-07	*
16	30114250	30115146	52518	1.93e-07	*
22	25849150	25850104	102492	1.93e-07	*
21	4944396	4945038	93410	1.93171e-07	*
15	33628568	33629105	46493	1.94301e-07	*
17	12549606	12550618	57580	1.94702e-07	*
KN150123.1	27213	27690	180021	1.96364e-07	*
9	8054230	8054924	172202	1.9649e-07	*
7	34113028	34113619	158036	1.9649e-07	*
10	33061826	33062592	12177	1.97387e-07	*
21	20589615	20592193	95695	1.97387e-07	*
7	56905527	56906393	161726	1.97761e-07	*
23	34005428	34006007	109034	1.98538e-07	*
9	13444897	13445260	172951	1.98919e-07	*
23	5514436	5515062	104792	1.98919e-07	*
13	33170076	33170949	31847	2.01208e-07	*
6	33514167	33514962	149638	2.0193e-07	*
3	40430216	40431734	127141	2.01959e-07	*
21	15875148	15876161	94877	2.02161e-07	*
4	8632463	8633489	131564	2.0247e-07	*
3	12316159	12318055	122636	2.02497e-07	*
14	31109602	31111654	38574	2.02497e-07	*
4	18173379	18174114	133649	2.02873e-07	*
6	10876981	10877582	146877	2.02956e-07	*
7	21694834	21696004	155687	2.03129e-07	*
24	8059316	8059982	112336	2.03264e-07	*
18	25961489	25961958	67523	2.03664e-07	*
7	68256189	68257376	162828	2.03685e-07	*
21	37159132	37159842	97760	2.03729e-07	*
21	38827300	38828398	98029	2.03972e-07	*
21	5123560	5124243	93440	2.0446e-07	*
24	35628253	35628953	116015	2.04542e-07	*
9	1843548	1844750	171246	2.04542e-07	*
4	27483236	27483670	134996	2.04542e-07	*
24	14697083	14697880	113145	2.05005e-07	*
7	26886131	26886645	156597	2.07232e-07	*
16	33676028	33677268	53137	2.07707e-07	*
23	24158548	24158995	107223	2.07873e-07	*
1	2312629	2313298	448	2.0803e-07	*
4	4548749	4549362	130687	2.09761e-07	*
19	47784830	47785138	77617	2.1042e-07	*
KN150640.1	5161	6584	181039	2.10766e-07	*
3	60554954	60555969	129431	2.11292e-07	*
6	6547456	6549513	146317	2.11917e-07	*
1	30680163	30681500	3832	2.11974e-07	*
7	30219237	30219958	157203	2.12104e-07	*
19	31235858	31236707	74964	2.12781e-07	*
1	5807152	5808271	966	2.1289e-07	*
11	35157841	35158577	18800	2.13133e-07	*
24	9511297	9512575	112558	2.1347e-07	*
22	32774354	32774906	103107	2.1347e-07	*
12	25355969	25356828	23370	2.14351e-07	*
17	22934646	22935426	59107	2.15241e-07	*
11	6763824	6764628	14932	2.15474e-07	*
15	20015511	20017255	44033	2.15937e-07	*
19	2270073	2271269	71244	2.16427e-07	*
23	34463166	34463665	109125	2.16786e-07	*
13	6180754	6181414	27974	2.16955e-07	*
20	23584627	23585374	88128	2.18284e-07	*
23	22089821	22090980	106707	2.19292e-07	*
9	11455402	11456134	172651	2.19751e-07	*
13	16993094	16995328	29142	2.20021e-07	*
1	39557072	39558689	4934	2.20082e-07	*
1	17439469	17441537	2406	2.21441e-07	*
17	32837246	32838210	60760	2.22418e-07	*
5	64553459	64554091	144116	2.23101e-07	*
15	25761990	25762514	45026	2.23416e-07	*
4	3134896	3135703	130469	2.23742e-07	*
9	42608280	42609164	177221	2.24086e-07	*
6	14433564	14434436	147311	2.24361e-07	*
14	6891165	6891804	35737	2.25601e-07	*
12	25964486	25965963	23502	2.26647e-07	*
15	34411051	34411552	46596	2.26675e-07	*
6	33584669	33585697	149650	2.27579e-07	*
7	31606282	31607403	157536	2.27972e-07	*
7	57001302	57001866	161744	2.27972e-07	*
25	22992759	22993718	120008	2.28016e-07	*
5	17989216	17989769	137792	2.28016e-07	*
12	36694234	36694640	25328	2.2833e-07	*
7	68293075	68294424	162838	2.2867e-07	*
8	51522665	51524572	170488	2.29488e-07	*
9	50270794	50271283	178322	2.29976e-07	*
2	39884868	39885444	82718	2.29976e-07	*
9	13626096	13627200	172976	2.30829e-07	*
8	20204136	20204780	166649	2.31028e-07	*
18	11444703	11445070	64983	2.32185e-07	*
23	34338941	34339777	109092	2.33476e-07	*
21	20607272	20609269	95701	2.3397e-07	*
6	27545497	27546668	148640	2.34102e-07	*
19	26062757	26064631	74168	2.34102e-07	*
14	39584599	39586012	40130	2.34837e-07	*
23	9717837	9718412	105317	2.35055e-07	*
19	47973200	47975169	77652	2.35439e-07	*
11	21636752	21637510	16591	2.35439e-07	*
13	32085529	32086207	31681	2.35544e-07	*
KZ116001.1	322	819	181227	2.35853e-07	*
8	44257223	44258115	169681	2.3654e-07	*
10	5924677	5926130	8592	2.37987e-07	*
5	68248044	68249282	144564	2.3869e-07	*
22	14270486	14271052	100768	2.40043e-07	*
17	50507604	50508161	62804	2.40349e-07	*
20	27165731	27166834	88757	2.40712e-07	*
14	49604352	49605168	41506	2.40718e-07	*
11	29914564	29915519	18013	2.425e-07	*
11	23216716	23217429	16898	2.45846e-07	*
9	44215581	44216361	177503	2.48075e-07	*
12	36682968	36683451	25327	2.49044e-07	*
24	5140021	5140554	111911	2.49765e-07	*
5	35019136	35020894	140363	2.50858e-07	*
6	15216453	15216935	147443	2.50858e-07	*
15	22396585	22397667	44412	2.5105e-07	*
22	19637190	19638807	101657	2.51071e-07	*
7	31516129	31516963	157509	2.52397e-07	*
19	12225849	12226535	72636	2.52397e-07	*
9	14439156	14439932	173104	2.52422e-07	*
20	30346761	30347198	89328	2.52422e-07	*
5	36095715	36096327	140536	2.53458e-07	*
7	26726344	26727466	156555	2.53964e-07	*
8	2968136	2968946	164083	2.53964e-07	*
20	33420617	33421279	89866	2.54118e-07	*
15	23702766	23704901	44602	2.54247e-07	*
2	25466993	25468423	80638	2.56393e-07	*
23	22823015	22824037	106868	2.57456e-07	*
19	25107370	25108091	73997	2.58146e-07	*
10	31302398	31303318	11838	2.58196e-07	*
1	19926031	19927705	2714	2.5936e-07	*
12	34281902	34283083	24879	2.61711e-07	*
6	31262520	31263517	149217	2.61711e-07	*
13	40800470	40800990	33035	2.62751e-07	*
6	52985589	52985894	152376	2.62751e-07	*
10	9794967	9795432	9010	2.62751e-07	*
1	1849195	1849518	378	2.62858e-07	*
15	38896437	38896844	47272	2.63908e-07	*
19	5769235	5770377	71797	2.64558e-07	*
17	15145912	15147028	57919	2.65014e-07	*
9	56102594	56103859	179006	2.65181e-07	*
4	14046542	14047384	132709	2.65229e-07	*
8	30184336	30185398	168171	2.65536e-07	*
12	30092665	30093448	24174	2.65536e-07	*
5	44424474	44425757	141754	2.65623e-07	*
10	3547429	3547922	8213	2.65662e-07	*
15	74365	76345	41864	2.65773e-07	*
11	14422941	14423466	15719	2.67037e-07	*
12	23596378	23597025	23076	2.67563e-07	*
3	12426509	12427744	122657	2.67648e-07	*
1	13113002	13113780	1879	2.67763e-07	*
10	13208802	13211258	9423	2.68788e-07	*
15	34520252	34520962	46615	2.6926e-07	*
4	11311070	11312234	132111	2.69671e-07	*
3	8635947	8636336	122317	2.70171e-07	*
17	30374347	30375270	60411	2.71478e-07	*
20	24719619	24720360	88319	2.71478e-07	*
3	28049036	28050114	125234	2.71695e-07	*
21	37601321	37602032	97844	2.72568e-07	*
9	43384144	43384805	177327	2.7266e-07	*
14	35134707	35136451	39357	2.7266e-07	*
24	34270705	34271289	115824	2.7266e-07	*
11	28254780	28256012	17811	2.7266e-07	*
3	26429401	26430167	124969	2.72984e-07	*
8	30517969	30518478	168250	2.72984e-07	*
10	4004021	4004444	8320	2.7478e-07	*
20	9587017	9588621	86494	2.76263e-07	*
2	39987029	39987923	82743	2.76683e-07	*
5	54624228	54625285	142988	2.77337e-07	*
1	5236434	5237306	825	2.78194e-07	*
24	38785899	38787855	116382	2.78996e-07	*
9	4741592	4742863	171739	2.79262e-07	*
1	25157253	25158227	3341	2.79394e-07	*
13	1466179	1466819	27174	2.79394e-07	*
12	34943195	34943948	25041	2.79996e-07	*
12	25149553	25150447	23328	2.80024e-07	*
4	12871541	12872522	132459	2.80602e-07	*
24	27828156	27828983	114975	2.8112e-07	*
16	20764116	20765002	51152	2.8112e-07	*
18	8604331	8605527	64505	2.8112e-07	*
13	13291237	13295426	28757	2.8112e-07	*
18	43952519	43952980	69454	2.81948e-07	*
23	46016326	46018409	110709	2.821e-07	*
5	28941145	28941621	139382	2.83465e-07	*
20	22693728	22694281	87964	2.84004e-07	*
16	31717248	31718086	52772	2.84429e-07	*
5	43427613	43430754	141590	2.86144e-07	*
7	50509132	50510309	160775	2.88111e-07	*
4	9153094	9153526	131688	2.88504e-07	*
7	65783639	65784490	162519	2.89476e-07	*
4	5249047	5249701	130838	2.89476e-07	*
1	30626112	30627871	3825	2.89926e-07	*
1	51516726	51517922	6669	2.90501e-07	*
9	26151248	26152280	174751	2.92679e-07	*
7	49767685	49768721	160708	2.92871e-07	*
15	46812343	46813665	48348	2.95067e-07	*
20	11261861	11262363	86660	2.95237e-07	*
13	8840300	8842065	28253	2.95288e-07	*
14	31182044	31182986	38594	2.96692e-07	*
23	24595100	24595864	107299	2.96799e-07	*
10	27519542	27520611	11217	2.9698e-07	*
24	3389388	3390392	111463	2.97125e-07	*
5	58887484	58888295	143449	2.97412e-07	*
4	11515665	11516366	132159	2.97412e-07	*
19	31857326	31858196	75086	2.97412e-07	*
23	28291864	28292390	107942	2.97412e-07	*
24	13801245	13801758	112973	2.98472e-07	*
3	12489870	12490603	122675	2.99086e-07	*
15	1197114	1197935	42016	2.99797e-07	*
11	11750078	11751068	15502	3.00415e-07	*
3	55727986	55729653	128882	3.00415e-07	*
25	16073300	16074389	119143	3.00897e-07	*
11	1685481	1685801	14115	3.02169e-07	*
7	71675480	71676172	163352	3.02249e-07	*
8	51265567	51266132	170446	3.02973e-07	*
4	8458157	8458741	131503	3.02973e-07	*
3	57076044	57076819	129035	3.03234e-07	*
1	5704246	5705273	941	3.05947e-07	*
23	27127185	27127761	107706	3.05962e-07	*
22	38451322	38452013	103863	3.06275e-07	*
5	32967172	32968404	140056	3.0644e-07	*
10	32203134	32203879	12033	3.09013e-07	*
11	35537386	35538505	18840	3.09013e-07	*
13	41898093	41898764	33120	3.09013e-07	*
24	35490594	35492931	115991	3.09971e-07	*
1	2144417	2145404	411	3.1007e-07	*
10	35386448	35387286	12454	3.10395e-07	*
4	18189733	18190451	133652	3.10928e-07	*
22	30198665	30199201	102848	3.11107e-07	*
2	41866391	41868582	83085	3.11541e-07	*
13	9974355	9975058	28328	3.11986e-07	*
20	43189335	43189916	91248	3.12669e-07	*
5	60515675	60517061	143608	3.13384e-07	*
7	18802195	18803009	155223	3.14604e-07	*
23	5758287	5759809	104819	3.15036e-07	*
20	29080810	29081574	89099	3.15362e-07	*
6	45904813	45906291	151377	3.16496e-07	*
18	40292402	40293348	68960	3.1657e-07	*
9	52162038	52162903	178580	3.1702e-07	*
5	25757907	25758685	138941	3.1702e-07	*
8	38027645	38028495	169068	3.1712e-07	*
5	43734365	43735293	141667	3.17404e-07	*
13	34761243	34761906	32172	3.17507e-07	*
19	19463141	19463721	73302	3.17507e-07	*
4	28295211	28296683	135087	3.20704e-07	*
17	35883495	35884350	61275	3.20704e-07	*
23	33472952	33473337	108936	3.21538e-07	*
18	39199877	39200814	68817	3.2442e-07	*
3	55931602	55932823	128918	3.25328e-07	*
21	5120402	5120793	93439	3.25506e-07	*
15	39596643	39597706	47496	3.27469e-07	*
15	35883401	35884184	46887	3.28298e-07	*
13	27537074	27537976	30813	3.31418e-07	*
15	36792290	36793541	46999	3.31418e-07	*
12	7548253	7548617	21478	3.31613e-07	*
25	19781762	19782372	119653	3.3225e-07	*
1	39622326	39623057	4959	3.33732e-07	*
20	44757056	44757368	91423	3.34346e-07	*
12	8803665	8805014	21704	3.34568e-07	*
12	47995234	47995635	26702	3.34594e-07	*
16	19873589	19874731	51053	3.34975e-07	*
14	7925834	7926736	35913	3.35812e-07	*
15	19848889	19849545	44013	3.35812e-07	*
5	49525726	49526265	142434	3.35894e-07	*
14	49613322	49614141	41508	3.37739e-07	*
14	45371089	45371663	41033	3.37739e-07	*
1	34362194	34363318	4172	3.3777e-07	*
21	310510	311444	92692	3.40111e-07	*
KN149903.1	3823	4663	179486	3.40584e-07	*
11	23760376	23761089	17006	3.41756e-07	*
15	33613476	33614516	46488	3.41756e-07	*
17	37847681	37849079	61560	3.41875e-07	*
16	34258585	34260938	53229	3.43107e-07	*
13	35348785	35349208	32290	3.43765e-07	*
23	1207343	1208240	104173	3.44266e-07	*
7	73669880	73670637	163615	3.44808e-07	*
6	9703049	9703675	146738	3.45393e-07	*
8	30010918	30011988	168128	3.45801e-07	*
5	28623880	28627224	139327	3.45801e-07	*
2	156893	157611	77788	3.46497e-07	*
20	48260352	48261081	91875	3.46497e-07	*
10	42354077	42355236	13346	3.47289e-07	*
7	66031439	66031948	162571	3.47353e-07	*
1	40415709	40417276	5091	3.47816e-07	*
17	10904470	10905496	57280	3.48617e-07	*
21	32337664	32339667	97275	3.49656e-07	*
23	31504802	31505163	108535	3.49728e-07	*
7	35966782	35968465	158463	3.49728e-07	*
11	18601079	18602152	16109	3.51087e-07	*
5	64062461	64063579	144060	3.51305e-07	*
10	10896792	10897668	9173	3.51305e-07	*
18	48263146	48264217	70186	3.53448e-07	*
16	27244062	27244826	52068	3.53955e-07	*
23	34243923	34244469	109074	3.54376e-07	*
23	23123880	23124491	106958	3.55314e-07	*
16	40732500	40732950	54235	3.55314e-07	*
12	25615182	25615974	23434	3.55345e-07	*
17	24110735	24114223	59305	3.55767e-07	*
13	45958178	45958651	33621	3.56249e-07	*
7	65983072	65983816	162561	3.56429e-07	*
7	61183861	61184859	162086	3.56437e-07	*
20	33257592	33258243	89814	3.5707e-07	*
20	3889730	3890419	85809	3.57131e-07	*
21	6593977	6594590	93683	3.58688e-07	*
23	6521418	6522556	104947	3.59641e-07	*
23	32851488	32852276	108807	3.60288e-07	*
8	33401494	33402134	168636	3.61709e-07	*
12	42611667	42612534	26071	3.66722e-07	*
4	2860794	2862107	130395	3.67845e-07	*
23	22100901	22101627	106710	3.70027e-07	*
24	5066518	5067475	111895	3.71317e-07	*
14	45117103	45117711	40982	3.71317e-07	*
23	33554034	33554621	108960	3.72593e-07	*
2	46489910	46490716	83771	3.73104e-07	*
10	3993669	3994571	8317	3.73343e-07	*
18	23928909	23929882	67154	3.73343e-07	*
24	38670562	38671327	116358	3.73343e-07	*
9	22741225	22742290	174193	3.75048e-07	*
24	7392431	7393171	112235	3.76205e-07	*
11	11217128	11217697	15445	3.76216e-07	*
10	31394761	31395413	11861	3.76524e-07	*
7	20989160	20989882	155540	3.77833e-07	*
19	86947	87314	70767	3.79115e-07	*
21	37174829	37175673	97762	3.81346e-07	*
14	33761314	33762276	39088	3.81346e-07	*
18	34129096	34130020	68179	3.81651e-07	*
7	51047811	51049056	160845	3.82077e-07	*
14	8160857	8161908	35956	3.82229e-07	*
5	52326183	52326730	142859	3.83148e-07	*
16	21006536	21007160	51200	3.83999e-07	*
2	19192811	19193264	79800	3.84012e-07	*
14	32987553	32988897	38937	3.84521e-07	*
1	5310480	5313062	845	3.8518e-07	*
5	58557438	58557999	143409	3.87705e-07	*
5	27643999	27644598	139187	3.89718e-07	*
2	35990077	35990639	82209	3.89871e-07	*
3	34385990	34387844	126289	3.90405e-07	*
19	31813819	31814748	75070	3.90405e-07	*
18	30645245	30646238	68062	3.90591e-07	*
[truncated: 44,706 more rows]

## Sheet: Table S7
Supplemental Table 7: Differentially accessible regions (DARs) that exhibit greater accessibility in the sox17E 48 hpf compared to sox17N 48hpf population.
DARs were calculated using DiffBind version 3.0.15 (Stark and Brown, 2011) with the DESeq2 option (Love, Huber and Anders, 2014), on the broad peaks files (.broadPeak) produced by MACS2. R version 4.2.1 (R Core Team, 2021) was used for this processing.
chrom	chromStart	chromEnd	names	FDR score	strand
25	15997667	15998409	119127	2.72748e-12	*
10	17415784	17416620	9866	2.84112e-12	*
21	7927817	7928520	93862	3.61394e-11	*
13	36031546	36032240	32391	1.33335e-10	*
9	48006436	48007776	178115	1.56498e-10	*
8	6576689	6577914	164492	4.44136e-10	*
24	36412521	36412903	116102	6.18336e-10	*
6	39333842	39334916	150377	7.10294e-10	*
25	13601077	13602275	118781	7.10294e-10	*
16	4273728	4274795	49310	9.74655e-10	*
17	42549697	42550230	62087	1.40252e-09	*
1	18694940	18695635	2548	1.42523e-09	*
6	40657155	40658091	150545	1.42523e-09	*
7	9904047	9904715	154107	1.51646e-09	*
18	26203358	26203908	67559	2.04107e-09	*
21	34972115	34973103	97541	2.04107e-09	*
22	22337162	22338502	102103	3.66541e-09	*
13	8840300	8842065	28253	5.93688e-09	*
13	8843520	8845475	28255	1.4976e-08	*
11	3587574	3588388	14401	1.65117e-08	*
4	4255911	4256550	130639	1.76705e-08	*
7	49667820	49668865	160690	1.7975e-08	*
12	36035142	36036230	25230	1.9967e-08	*
10	22146875	22150939	10415	2.25777e-08	*
KN149733.1	11878	12807	179190	2.39937e-08	*
19	43642535	43643589	76968	2.89729e-08	*
21	25763773	25767177	96492	3.22213e-08	*
21	25755060	25756445	96488	3.22213e-08	*
10	35148697	35150406	12417	3.41552e-08	*
24	38670562	38671327	116358	4.38641e-08	*
6	39327114	39328101	150373	4.85981e-08	*
8	30985272	30985978	168332	4.85981e-08	*
11	7028959	7030016	14951	4.88913e-08	*
8	39802327	39803812	169198	5.26962e-08	*
13	4918466	4918884	27694	5.29986e-08	*
8	22830434	22831240	166986	7.53261e-08	*
13	41898093	41898764	33120	7.53261e-08	*
14	41451867	41452873	40473	7.56503e-08	*
23	33288373	33292114	108898	7.75178e-08	*
7	61186397	61187065	162087	7.8165e-08	*
13	47294359	47295146	33858	8.06825e-08	*
11	24728801	24729560	17180	9.95109e-08	*
8	48877061	48877732	170159	1.00519e-07	*
10	17026777	17027836	9807	1.00519e-07	*
21	25235779	25236398	96415	1.02475e-07	*
10	41176714	41177513	13193	1.12601e-07	*
13	37165628	37166621	32586	1.16808e-07	*
16	46695318	46695901	55042	1.16808e-07	*
9	28221595	28222728	175052	1.18882e-07	*
2	35950793	35951246	82203	1.28987e-07	*
24	21633085	21633987	113955	1.35926e-07	*
20	22666287	22667187	87954	1.38788e-07	*
18	36991939	36992656	68521	1.38788e-07	*
11	2329097	2330071	14226	1.45849e-07	*
15	36444973	36445729	46948	1.55658e-07	*
8	13106200	13107208	165398	1.93192e-07	*
22	17677463	17679439	101334	1.94019e-07	*
24	21609980	21610416	113949	2.09517e-07	*
6	28887383	28888955	148837	2.36834e-07	*
9	1051303	1052225	171096	2.36834e-07	*
8	27149296	27149900	167705	2.47129e-07	*
7	37973892	37974791	158906	2.69407e-07	*
12	2964353	2965086	20935	3.09802e-07	*
8	31109216	31109667	168352	3.44095e-07	*
10	15879075	15879661	9705	3.74177e-07	*
5	57854864	57855171	143361	3.85547e-07	*
7	32901395	32901980	157757	4.17911e-07	*
25	13592297	13596606	118779	4.17911e-07	*
16	41091924	41092591	54306	4.17911e-07	*
14	40819833	40822697	40391	4.17911e-07	*
1	8146154	8146694	1335	4.39102e-07	*
2	35990077	35990639	82209	4.50952e-07	*
20	3960495	3961096	85821	4.83955e-07	*
7	54277603	54278325	161285	4.87077e-07	*
17	10361172	10362084	57194	4.87077e-07	*
15	42420511	42421222	47866	4.90954e-07	*
11	27441775	27442927	17667	5.03505e-07	*
7	25033035	25034037	156247	6.05078e-07	*
24	33527213	33527883	115744	6.21897e-07	*
11	25927456	25928155	17390	7.28333e-07	*
22	22215289	22215963	102088	7.34717e-07	*
25	8412814	8413469	118167	7.84231e-07	*
6	32343629	32344333	149430	8.68951e-07	*
5	43005972	43006846	141573	8.96457e-07	*
7	57001302	57001866	161744	9.55133e-07	*
21	26108467	26108983	96519	9.5958e-07	*
2	2104596	2105277	78085	9.61746e-07	*
23	25832412	25833018	107501	1.03959e-06	*
16	39529682	39530313	53991	1.06466e-06	*
16	46697251	46698254	55043	1.10183e-06	*
13	8838521	8839814	28252	1.10265e-06	*
6	7771222	7772085	146511	1.10265e-06	*
20	45675380	45675776	91556	1.15484e-06	*
9	7329195	7329952	172081	1.22571e-06	*
9	33965429	33966308	176042	1.22571e-06	*
23	9522156	9523172	105301	1.22571e-06	*
3	17230424	17230955	123368	1.24575e-06	*
1	26606382	26606894	3505	1.29009e-06	*
3	11127585	11128679	122500	1.29674e-06	*
9	33932189	33933224	176030	1.29674e-06	*
1	26629090	26629967	3509	1.29674e-06	*
16	41748393	41748882	54360	1.34204e-06	*
23	9511612	9512074	105300	1.34204e-06	*
6	55884361	55885463	152787	1.34204e-06	*
22	661031	667338	99038	1.34204e-06	*
18	6802833	6804172	64276	1.34204e-06	*
19	5383781	5385103	71739	1.35332e-06	*
3	30920648	30921491	125693	1.39107e-06	*
7	69019162	69020162	163020	1.43218e-06	*
2	52138498	52139537	84374	1.44401e-06	*
4	889277	890312	130003	1.44401e-06	*
18	8172312	8172820	64431	1.57385e-06	*
11	42366640	42367243	19801	1.58785e-06	*
25	34005688	34006646	121123	1.58785e-06	*
16	54455317	54455846	56011	1.68169e-06	*
21	10886078	10886885	94174	1.68169e-06	*
22	10522945	10524413	100060	1.75049e-06	*
16	6416026	6416354	49637	1.80469e-06	*
11	10517877	10518224	15335	1.87217e-06	*
11	24738342	24739174	17183	1.90242e-06	*
11	6763824	6764628	14932	2.05193e-06	*
1	59343377	59344538	7597	2.07874e-06	*
9	7365558	7367004	172085	2.08025e-06	*
11	25930393	25932051	17392	2.09099e-06	*
1	20593175	20594252	2783	2.19589e-06	*
21	21292631	21292940	95797	2.26073e-06	*
20	2886753	2887382	85722	2.36942e-06	*
3	50139282	50140009	128232	2.49604e-06	*
24	35628253	35628953	116015	2.58346e-06	*
1	16594206	16594733	2305	2.71719e-06	*
KN150286.1	8209	8926	180385	3.02077e-06	*
14	32918140	32919304	38924	3.1647e-06	*
7	49663795	49664414	160687	3.17419e-06	*
1	26622010	26622994	3508	3.18926e-06	*
8	25932162	25933137	167471	3.49604e-06	*
22	26501988	26502620	102543	3.49604e-06	*
12	1558917	1559430	20701	3.49604e-06	*
16	26676283	26678253	51977	3.49604e-06	*
7	61183861	61184859	162086	3.71685e-06	*
23	26892536	26892933	107665	3.84255e-06	*
17	41259681	41260724	61925	4.00057e-06	*
11	11746303	11747368	15500	4.00057e-06	*
24	38677068	38677789	116359	4.00057e-06	*
8	20204136	20204780	166649	4.57859e-06	*
23	10649927	10650425	105477	4.65295e-06	*
11	620930	621582	13949	4.70934e-06	*
9	21951579	21952767	174106	5.43603e-06	*
20	16812832	16813189	87131	5.43603e-06	*
2	10672812	10673613	79075	5.57883e-06	*
12	23488393	23488990	23052	5.70746e-06	*
23	44977333	44977875	110573	5.9266e-06	*
21	2603562	2604509	93072	6.03109e-06	*
13	23988071	23988633	30122	6.80959e-06	*
21	22534914	22535455	95938	6.80959e-06	*
21	631843	632570	92762	6.89916e-06	*
10	16891130	16892157	9802	7.10071e-06	*
4	5249047	5249701	130838	7.14943e-06	*
3	36487548	36488920	126678	7.24479e-06	*
8	38836314	38837072	169158	7.26808e-06	*
23	24071291	24073905	107206	7.26808e-06	*
21	38153444	38154119	97934	7.3473e-06	*
22	22335937	22336458	102102	7.46216e-06	*
4	4250195	4250847	130637	7.46216e-06	*
7	34800579	34802226	158196	7.46216e-06	*
15	36451074	36452055	46949	7.49269e-06	*
3	29522329	29522954	125476	7.91211e-06	*
2	5517213	5517748	78556	7.99105e-06	*
20	27057286	27058100	88735	8.05944e-06	*
23	7393176	7393598	105046	8.114e-06	*
6	39307693	39313602	150368	8.11439e-06	*
6	50522953	50523887	152002	8.42529e-06	*
1	44198424	44198894	5564	8.90215e-06	*
21	456541	456939	92718	8.93703e-06	*
24	11075980	11076576	112764	9.5349e-06	*
12	5629493	5630695	21252	9.87036e-06	*
17	24583752	24584456	59424	9.93187e-06	*
23	21751759	21752388	106664	9.96503e-06	*
9	11642951	11643461	172680	1.00417e-05	*
5	6444865	6445491	136363	1.02962e-05	*
7	24903297	24904849	156221	1.06834e-05	*
4	3127631	3128337	130466	1.09019e-05	*
23	24067421	24070647	107205	1.09572e-05	*
7	53116510	53118098	161101	1.09706e-05	*
7	53132499	53132978	161104	1.11851e-05	*
12	17123328	17123712	22306	1.17608e-05	*
12	4248187	4250174	21086	1.18873e-05	*
11	37964083	37964978	19152	1.22505e-05	*
11	6506700	6507117	14876	1.23195e-05	*
23	45396354	45396834	110605	1.23195e-05	*
18	40867639	40867968	69035	1.23427e-05	*
19	12233689	12235254	72639	1.25331e-05	*
23	10145733	10147794	105384	1.25997e-05	*
8	38200822	38201696	169106	1.26161e-05	*
10	2628876	2629576	8129	1.28382e-05	*
7	30189571	30190636	157196	1.28599e-05	*
23	34005428	34006007	109034	1.29367e-05	*
6	43270105	43271436	150899	1.33479e-05	*
20	27075359	27076300	88739	1.33479e-05	*
11	11750078	11751068	15502	1.34496e-05	*
24	21535083	21535315	113933	1.34496e-05	*
11	24755948	24756645	17188	1.34496e-05	*
5	38865221	38865545	140955	1.36994e-05	*
1	25679048	25680016	3398	1.37878e-05	*
15	45560378	45560935	48221	1.37878e-05	*
3	40103037	40103527	127091	1.38018e-05	*
8	30738822	30739764	168299	1.42857e-05	*
5	2838117	2838800	135980	1.42857e-05	*
17	26873336	26874852	59762	1.43831e-05	*
25	22171316	22171885	119890	1.4518e-05	*
16	29618386	29619246	52436	1.46073e-05	*
9	46459698	46460612	177860	1.46073e-05	*
20	52996526	52997105	92368	1.46073e-05	*
24	11482289	11482929	112799	1.46237e-05	*
12	48819620	48820103	26849	1.47741e-05	*
24	36404226	36404878	116100	1.50128e-05	*
20	22348770	22350211	87884	1.52721e-05	*
9	21150498	21151150	173954	1.68239e-05	*
19	15225370	15226170	72965	1.71701e-05	*
18	48895388	48895840	70304	1.7301e-05	*
19	5390968	5391779	71741	1.73948e-05	*
20	2687100	2688413	85688	1.84696e-05	*
12	6041327	6041975	21324	1.86393e-05	*
10	28976780	28977341	11533	1.93511e-05	*
23	31884528	31885444	108617	2.01323e-05	*
9	50170576	50171245	178307	2.01323e-05	*
8	10323119	10324332	165036	2.05074e-05	*
23	24078374	24079772	107208	2.05074e-05	*
5	31747074	31748180	139849	2.16164e-05	*
19	48241259	48241851	77718	2.20443e-05	*
13	33031916	33032416	31832	2.20443e-05	*
4	9780719	9781347	131796	2.25357e-05	*
24	2854045	2855035	111363	2.3146e-05	*
6	27131356	27131725	148574	2.31564e-05	*
7	47308103	47308556	160364	2.32155e-05	*
20	45810464	45811287	91567	2.32155e-05	*
23	5453647	5454512	104782	2.33241e-05	*
13	34848011	34848512	32192	2.34813e-05	*
17	16607934	16609165	58108	2.42243e-05	*
8	31102533	31102980	168348	2.42302e-05	*
1	56182888	56184014	7294	2.44378e-05	*
18	22106390	22107109	66749	2.44378e-05	*
3	18531875	18532235	123594	2.50328e-05	*
10	17088037	17089235	9814	2.79397e-05	*
4	11898614	11899376	132256	2.79397e-05	*
20	7320046	7320854	86191	2.81554e-05	*
10	35425687	35426627	12461	2.86068e-05	*
19	12261449	12262669	72643	2.86068e-05	*
11	32697986	32698695	18434	2.99052e-05	*
21	38827300	38828398	98029	3.08044e-05	*
13	23629258	23630268	30090	3.11317e-05	*
19	7611000	7611713	72073	3.27928e-05	*
8	14545000	14545280	165567	3.27928e-05	*
22	15776142	15776763	100956	3.27928e-05	*
3	25256196	25256436	124766	3.42306e-05	*
8	25327582	25327844	167350	3.42306e-05	*
7	6616350	6616907	153786	3.43601e-05	*
16	22830046	22830460	51399	3.43601e-05	*
6	32354014	32354563	149433	3.43601e-05	*
16	23430659	23431759	51516	3.43601e-05	*
6	50651861	50652724	152034	3.43601e-05	*
20	27081095	27081723	88740	3.43601e-05	*
13	48051299	48051929	33955	3.44198e-05	*
3	37641441	37642134	126809	3.46114e-05	*
25	22164058	22164807	119889	3.46313e-05	*
12	18266318	18266863	22452	3.48338e-05	*
13	47146818	47147150	33841	3.48338e-05	*
11	35859707	35860444	18907	3.48338e-05	*
19	537993	538381	70877	3.53101e-05	*
16	22760704	22761042	51389	3.54516e-05	*
6	59475973	59476398	153232	3.58267e-05	*
11	10515092	10516007	15334	3.66767e-05	*
14	49710248	49710927	41527	3.69226e-05	*
15	47752196	47752929	48517	3.74774e-05	*
2	20110951	20111288	79870	3.74774e-05	*
14	21301264	21302153	37047	3.76842e-05	*
1	44200222	44201039	5565	3.89754e-05	*
1	52497409	52498484	6830	3.89754e-05	*
12	20679598	20680065	22712	3.89754e-05	*
12	6033700	6034232	21323	3.93763e-05	*
6	2951027	2952329	145760	3.95436e-05	*
18	46288041	46289359	69834	3.95436e-05	*
13	21701185	21702431	29795	3.96283e-05	*
8	53179557	53180039	170736	3.96283e-05	*
15	43160967	43162859	47944	3.96283e-05	*
21	43974883	43976453	98584	4.01387e-05	*
6	8614339	8614745	146616	4.01387e-05	*
8	43293597	43294028	169548	4.01387e-05	*
6	10899927	10901028	146880	4.04187e-05	*
5	31735094	31735922	139844	4.09027e-05	*
8	38199607	38200290	169105	4.09946e-05	*
17	50688184	50688819	62837	4.09946e-05	*
20	34314068	34314904	89998	4.09946e-05	*
14	26174467	26175698	37762	4.1973e-05	*
7	19835394	19837188	155341	4.1973e-05	*
17	15919801	15920289	58010	4.20737e-05	*
22	30177908	30178351	102841	4.20737e-05	*
5	27898021	27898538	139219	4.43937e-05	*
22	38149655	38150639	103821	4.44198e-05	*
13	36860168	36860666	32533	4.54258e-05	*
16	17199673	17200331	50830	4.62183e-05	*
23	10154298	10155189	105386	4.73731e-05	*
20	25481269	25481772	88472	4.76378e-05	*
8	21178029	21178588	166811	4.83089e-05	*
2	10797618	10798087	79087	5.05642e-05	*
1	46508924	46509268	5875	5.2286e-05	*
12	46653243	46654296	26543	5.27382e-05	*
7	25035897	25036765	156248	5.3187e-05	*
24	39767616	39768375	116527	5.38251e-05	*
10	27062489	27063516	11071	5.52097e-05	*
23	39586018	39586450	109973	5.52542e-05	*
8	4547077	4548017	164302	5.52542e-05	*
5	24174741	24176415	138640	5.52613e-05	*
6	30411416	30412029	149057	5.72228e-05	*
2	41799230	41799926	83067	5.80322e-05	*
10	39054779	39055963	13005	5.80322e-05	*
1	25848095	25849053	3419	5.80322e-05	*
7	11174132	11174748	154219	5.80322e-05	*
20	35899182	35900265	90265	5.80322e-05	*
19	41493566	41494065	76626	6.01963e-05	*
20	33692468	33692822	89897	6.1121e-05	*
11	40758553	40758892	19529	6.17852e-05	*
18	44681700	44682559	69608	6.22204e-05	*
2	20920922	20921527	79960	6.23992e-05	*
21	25738319	25739739	96483	6.23992e-05	*
23	24010420	24011054	107193	6.23992e-05	*
9	1056422	1057023	171098	6.23992e-05	*
22	5784709	5785366	99725	6.23992e-05	*
22	5682126	5683528	99712	6.23992e-05	*
12	23169696	23170202	22992	6.23992e-05	*
8	47342408	47342991	169929	6.23992e-05	*
1	5519364	5520076	889	6.24098e-05	*
2	750815	751303	77921	6.29748e-05	*
17	37092577	37092896	61434	6.2975e-05	*
1	52666696	52667153	6871	6.36846e-05	*
5	56479240	56479844	143184	6.37165e-05	*
1	19390333	19391504	2647	6.40962e-05	*
11	40751874	40752782	19528	6.49249e-05	*
15	36457502	36459063	46950	6.49249e-05	*
13	2111922	2112530	27248	6.49249e-05	*
5	48861999	48862471	142294	6.49249e-05	*
5	57473603	57474598	143319	6.49249e-05	*
5	43007844	43008731	141574	6.49249e-05	*
14	30291429	30291972	38414	6.51001e-05	*
10	16412018	16412364	9770	6.63349e-05	*
19	3366100	3366392	71428	6.7494e-05	*
1	217301	217635	60	6.80836e-05	*
17	31747781	31748628	60604	6.90017e-05	*
13	45111909	45112574	33509	6.98969e-05	*
8	47354627	47355321	169932	6.9984e-05	*
23	39859391	39859898	110015	6.9984e-05	*
14	21514255	21514741	37075	6.9984e-05	*
24	2286588	2287217	111259	7.02292e-05	*
2	36615545	36618175	82243	7.23849e-05	*
14	26752784	26754677	37888	7.30058e-05	*
2	3761784	3762305	78307	7.36482e-05	*
20	53002467	53003271	92370	7.40511e-05	*
17	26534318	26535097	59696	7.51449e-05	*
3	15500556	15501392	123095	7.51449e-05	*
9	3063504	3063788	171489	7.51449e-05	*
2	43770817	43771292	83398	7.53041e-05	*
23	8721001	8721601	105196	7.5893e-05	*
7	40880433	40880994	159375	7.60105e-05	*
20	45811519	45812728	91568	7.72039e-05	*
3	39346360	39347301	126960	7.72039e-05	*
17	32435516	32436228	60698	7.79902e-05	*
22	38137232	38137795	103820	8.00171e-05	*
21	3700020	3700459	93266	8.05285e-05	*
23	10661921	10662910	105480	8.09614e-05	*
6	50147386	50147852	151940	8.15801e-05	*
25	23518862	23519378	120061	8.22913e-05	*
8	16647347	16647910	165949	8.41636e-05	*
10	201551	202969	7687	8.41916e-05	*
3	61466089	61466374	129573	8.4658e-05	*
23	35033242	35034066	109238	8.65269e-05	*
17	8594553	8594794	56905	8.68735e-05	*
21	30907609	30908026	97108	8.81981e-05	*
10	15056919	15057376	9608	8.81981e-05	*
8	13012477	13013419	165382	8.87997e-05	*
2	48078778	48079722	83998	8.8933e-05	*
16	26608111	26608528	51968	8.89751e-05	*
1	10701458	10702638	1625	8.89751e-05	*
21	5804342	5804860	93534	9.17957e-05	*
17	43351627	43352033	62132	9.20373e-05	*
14	12067410	12068000	36237	9.41457e-05	*
16	17610396	17611631	50872	9.72026e-05	*
17	10343238	10343969	57192	9.72654e-05	*
22	513117	514394	99008	9.78849e-05	*
18	3515817	3516687	63887	9.8016e-05	*
23	44601030	44602443	110519	9.90138e-05	*
11	27428258	27428967	17664	9.90138e-05	*
1	44176639	44178901	5559	9.90138e-05	*
5	65990251	65991223	144290	0.000100625	*
19	5369346	5370474	71736	0.000101766	*
11	323931	325261	13897	0.000102215	*
22	36855772	36856830	103626	0.000102447	*
20	2074180	2074849	85584	0.000102471	*
21	40068363	40068948	98128	0.00010403	*
5	63120751	63122187	143928	0.000104332	*
9	8595007	8595739	172295	0.000106235	*
10	9653425	9654044	8985	0.000107297	*
7	49675927	49676808	160692	0.00010797	*
4	22323221	22323615	134401	0.000108414	*
16	41080978	41081864	54304	0.000108795	*
23	26782984	26783631	107652	0.000109222	*
6	7786107	7786511	146515	0.000111213	*
22	37217416	37218218	103680	0.000111213	*
2	10118610	10119714	78998	0.000111691	*
12	6011452	6011921	21322	0.000112399	*
4	21456100	21457309	134270	0.000112399	*
16	42007688	42009494	54403	0.000112399	*
4	4253408	4254097	130638	0.000112828	*
5	31574334	31575607	139825	0.000115447	*
7	65421382	65422122	162472	0.000117355	*
25	22186404	22187543	119895	0.000119116	*
2	32660617	32661154	81661	0.000119295	*
9	43584820	43586153	177365	0.000119411	*
23	15182406	15182690	105871	0.000119411	*
12	43563886	43564317	26255	0.000119411	*
17	15970172	15970544	58015	0.000119411	*
11	16459711	16460407	15902	0.000121272	*
7	6725913	6726444	153805	0.000121735	*
21	25759509	25759890	96490	0.000121735	*
6	625568	626330	145334	0.000122566	*
23	39492115	39492454	109964	0.000122969	*
6	50614218	50614524	152022	0.00012426	*
12	17751586	17752391	22402	0.00012426	*
22	22021352	22023002	102067	0.000124769	*
7	34492553	34493164	158106	0.000126156	*
11	25893521	25894277	17385	0.000127688	*
16	45397608	45398897	54870	0.000128028	*
15	26555932	26556619	45121	0.000129169	*
20	3902861	3903312	85812	0.000129169	*
7	40725064	40725494	159357	0.000129408	*
21	39078497	39078737	98044	0.000130228	*
9	24238969	24240672	174433	0.000130329	*
25	23564034	23564642	120069	0.000133883	*
1	18635397	18636726	2539	0.000134564	*
19	4933343	4934213	71685	0.00013481	*
5	2783239	2784410	135973	0.000135022	*
16	46311544	46311999	54991	0.000135664	*
17	31368747	31370344	60554	0.000135686	*
16	23966499	23966814	51577	0.00013606	*
7	52414062	52414981	160993	0.00013606	*
17	51871460	51872039	63020	0.00013606	*
7	53128244	53129939	161102	0.000136076	*
KN150074.1	6472	7325	179909	0.000136333	*
2	27392543	27393189	80891	0.000136659	*
4	11990630	11990984	132274	0.000137363	*
11	6658349	6659095	14915	0.000138648	*
17	45654183	45654837	62395	0.000140979	*
8	44130354	44130879	169661	0.000141395	*
6	38988767	38989588	150319	0.000141395	*
6	47761526	47762153	151573	0.000144503	*
10	7616323	7617651	8720	0.000145837	*
23	25233647	25234897	107398	0.000147167	*
13	1160845	1161331	27112	0.000148618	*
6	6824633	6825242	146374	0.000148966	*
18	6798643	6799279	64275	0.000149413	*
11	23400166	23401347	16920	0.00014951	*
3	37578725	37579797	126802	0.00014951	*
16	9742229	9742494	50053	0.000150047	*
22	18686183	18686680	101536	0.000150225	*
6	28767332	28768572	148805	0.000150225	*
2	17797727	17799070	79633	0.0001549	*
10	4987477	4988291	8462	0.0001549	*
19	4505373	4505757	71634	0.0001549	*
14	40800362	40801634	40384	0.00015531	*
19	5350958	5352371	71733	0.00015906	*
2	10111561	10111872	78997	0.000159246	*
16	26648040	26648729	51973	0.000159246	*
20	24130769	24131251	88252	0.000160531	*
13	6434611	6435352	28001	0.000160531	*
5	25677696	25678680	138922	0.000160531	*
7	19345721	19346306	155292	0.000160531	*
10	18925159	18925556	10030	0.000160531	*
20	8670857	8671241	86403	0.000160531	*
6	23890392	23891190	148066	0.000162216	*
19	26030970	26031447	74155	0.000162216	*
21	22984155	22985579	96010	0.000163574	*
2	3763988	3764573	78308	0.000163771	*
25	2080896	2081509	117278	0.000166572	*
22	16005194	16005670	100995	0.000167432	*
13	33492276	33492790	31902	0.000168457	*
5	57658749	57660189	143344	0.000168599	*
23	26895566	26896287	107666	0.000169717	*
16	26664006	26664735	51976	0.00017035	*
17	34621878	34622276	61040	0.000171269	*
11	13287883	13288184	15607	0.000172087	*
11	11668070	11668564	15483	0.000173862	*
23	10175993	10178258	105391	0.000174142	*
19	8952204	8952835	72270	0.000174442	*
20	267616	268015	85302	0.000174442	*
8	16743790	16744398	165969	0.000174543	*
14	21100396	21101314	37016	0.000174543	*
17	10806815	10807811	57263	0.000175949	*
6	28051365	28052073	148724	0.000176835	*
10	33025165	33026098	12165	0.000178054	*
6	28877166	28878079	148832	0.000178054	*
4	22592440	22592902	134463	0.000178056	*
22	35938474	35939459	103456	0.000178056	*
23	17358955	17359352	106064	0.000178056	*
7	26546911	26547618	156526	0.000178403	*
5	57479577	57480450	143320	0.000179043	*
11	10983831	10984488	15419	0.00018078	*
9	11042887	11043319	172596	0.000182881	*
14	32431266	32431661	38815	0.00018391	*
7	33512411	33513755	157898	0.00018391	*
20	30795044	30795889	89407	0.000184622	*
16	5406715	5408904	49474	0.000184622	*
20	42718125	42719331	91216	0.000184957	*
19	33213793	33214527	75362	0.000189035	*
24	20405690	20406402	113764	0.000189035	*
11	41956116	41956582	19715	0.000189934	*
8	38016524	38017437	169064	0.000190187	*
18	20624280	20625069	66568	0.000193738	*
9	6315096	6315655	171948	0.000197416	*
1	20583213	20583630	2779	0.000199055	*
1	33299213	33300185	4060	0.000200628	*
2	42083001	42083618	83115	0.000201192	*
3	14048047	14048451	122889	0.000201869	*
20	25483501	25483973	88473	0.000202562	*
8	31512095	31512373	168410	0.000204908	*
22	22157829	22158293	102083	0.000205021	*
20	30774891	30775069	89403	0.000205021	*
13	32224609	32225302	31700	0.000207541	*
25	24138789	24139763	120140	0.000207552	*
2	39017207	39018141	82567	0.000207889	*
8	993794	994600	163846	0.000208869	*
4	18798914	18799517	133761	0.000211863	*
11	22019191	22019819	16705	0.000211863	*
20	29539235	29539931	89159	0.000212198	*
20	26648544	26649367	88638	0.000212864	*
5	31597342	31598109	139829	0.000215211	*
23	17054221	17054844	105992	0.000215896	*
23	5721791	5722480	104815	0.000218895	*
20	16971322	16972789	87146	0.00021951	*
21	35196984	35197227	97552	0.000219859	*
8	28409412	28409865	167875	0.000221119	*
3	17155118	17155783	123352	0.000225968	*
6	39335536	39335698	150378	0.000225968	*
12	46606041	46606797	26535	0.000227705	*
16	11050436	11051302	50228	0.000228248	*
16	9675252	9676395	50045	0.00022914	*
24	2374031	2374665	111272	0.000230621	*
5	3312917	3313553	136036	0.000230632	*
KN150408.1	27704	28113	180589	0.000231267	*
25	15993569	15994595	119126	0.000231267	*
12	30115490	30115717	24183	0.000231267	*
13	18325936	18326516	29397	0.00023313	*
14	15790015	15790835	36488	0.000234753	*
8	25841697	25843371	167453	0.000236046	*
16	54918803	54919272	56085	0.000236046	*
9	13083868	13084413	172883	0.000236046	*
3	34583791	34584285	126343	0.000237399	*
15	31813746	31814382	46164	0.000237938	*
1	12134285	12135788	1766	0.000239494	*
25	29525047	29525396	120485	0.000239494	*
23	14570260	14570996	105781	0.000241745	*
19	31303263	31303675	74977	0.000242277	*
17	27047290	27049166	59787	0.000242468	*
4	11598217	11599210	132181	0.000242468	*
12	46663274	46663792	26545	0.000242835	*
2	52245100	52245567	84385	0.000248123	*
23	26255160	26255690	107551	0.000249239	*
3	7743473	7743926	122226	0.000249725	*
4	24093174	24093888	134661	0.000249725	*
17	25332516	25333249	59535	0.000251129	*
18	6732520	6733154	64263	0.000251867	*
25	28409340	28409967	120375	0.000251991	*
13	1172824	1173087	27114	0.000253196	*
22	30180151	30180682	102842	0.000255257	*
22	37891213	37891722	103788	0.0002554	*
21	25624316	25625348	96461	0.000256092	*
24	25914784	25916246	114683	0.000257111	*
15	24941417	24942861	44855	0.000257111	*
5	36864257	36865797	140693	0.00025787	*
1	102193	102983	31	0.00025787	*
1	52999598	53000241	6917	0.00025787	*
17	25540441	25540989	59582	0.00026144	*
3	26767669	26767985	125035	0.000262766	*
16	23227981	23228618	51476	0.000263602	*
10	13208802	13211258	9423	0.00026671	*
17	20193458	20193718	58701	0.00026905	*
18	18527071	18528465	66186	0.000269455	*
13	16339237	16339705	29045	0.000272144	*
3	25853702	25854170	124872	0.000273304	*
15	37863024	37863368	47136	0.000276633	*
17	48333730	48334640	62607	0.000276633	*
16	26555274	26556151	51961	0.000278721	*
2	987053	987297	77959	0.000278721	*
23	31428244	31428959	108520	0.000279896	*
13	39857392	39858075	32893	0.000281583	*
3	29468886	29469935	125465	0.000281583	*
1	15308768	15310337	2145	0.000284223	*
14	48878454	48879081	41432	0.000284223	*
16	20354079	20354546	51094	0.000285127	*
5	19256784	19257358	137936	0.000285127	*
22	20125730	20126837	101747	0.000286069	*
16	5835878	5837001	49526	0.000286822	*
5	9809026	9809567	136698	0.000294693	*
11	18752030	18752980	16147	0.000299476	*
13	21417029	21417417	29767	0.000300988	*
16	26686771	26687912	51979	0.000301933	*
22	11734807	11735827	100331	0.000301933	*
5	6758303	6758830	136403	0.000301933	*
14	40770803	40772034	40374	0.000301933	*
18	3278958	3279815	63852	0.000302417	*
18	44856435	44856791	69626	0.000306918	*
3	51798215	51799974	128372	0.000306918	*
7	23783394	23783764	156012	0.000308597	*
1	51543375	51543847	6677	0.000309531	*
5	34938649	34939195	140339	0.000312473	*
23	27409105	27410287	107764	0.000314315	*
14	14551142	14551861	36351	0.000315969	*
9	44309607	44310435	177525	0.00031695	*
7	67350855	67351375	162694	0.00031695	*
18	25022019	25022666	67369	0.00031695	*
19	40364058	40364461	76466	0.000319981	*
8	49589273	49590144	170232	0.000319981	*
15	23740554	23741241	44615	0.000321072	*
5	13443533	13443887	137020	0.000323562	*
4	77635878	77636881	135571	0.000323562	*
2	68583	70378	77764	0.000325217	*
13	25577042	25577837	30416	0.000325217	*
23	33253499	33254451	108893	0.000325772	*
8	3311827	3312793	164143	0.000326343	*
13	36020716	36021948	32389	0.000326343	*
8	13080195	13081097	165392	0.00032898	*
2	42488522	42488911	83159	0.000331418	*
12	15435294	15435903	22178	0.000333817	*
8	31325193	31325950	168376	0.00033514	*
19	12225849	12226535	72636	0.000337418	*
15	42261658	42262968	47845	0.000344154	*
6	49070834	49071701	151786	0.000344415	*
25	22188602	22188812	119896	0.000347924	*
16	28540268	28540613	52253	0.000348234	*
13	4634860	4635301	27647	0.000348286	*
23	29881026	29881616	108258	0.000349031	*
20	30754953	30755435	89396	0.000349196	*
16	24006395	24007206	51585	0.000352951	*
4	18643484	18643923	133732	0.000355345	*
14	48909427	48910680	41436	0.000358092	*
12	18744087	18744992	22496	0.000358155	*
8	32406581	32407281	168485	0.000360147	*
20	46316397	46317001	91616	0.000360977	*
21	7931050	7932050	93863	0.000360977	*
5	41394604	41396064	141406	0.000363532	*
22	26669630	26670792	102565	0.000365988	*
5	12586672	12587280	136915	0.000365988	*
7	583838	584538	153484	0.000367339	*
19	48263537	48264256	77726	0.000367339	*
11	21871427	21872135	16651	0.000368749	*
6	52684175	52685376	152318	0.000369052	*
14	33273409	33274173	39002	0.000371493	*
7	56968924	56969585	161739	0.000373852	*
16	7723111	7723476	49827	0.000377282	*
3	23396778	23397178	124382	0.000379361	*
1	38402370	38402944	4705	0.000379874	*
18	36626695	36627191	68469	0.000380843	*
1	46861579	46862893	5953	0.000383659	*
22	22340526	22341076	102104	0.00038399	*
1	58061663	58062027	7412	0.000384594	*
15	30095899	30096156	45861	0.000388575	*
19	34963465	34964632	75696	0.000396137	*
2	4178505	4178903	78358	0.000396216	*
21	39025680	39026726	98039	0.000396489	*
22	26352477	26353116	102528	0.000398371	*
21	25687633	25688852	96477	0.00039909	*
KN150136.1	3396	4291	180078	0.00040089	*
21	2091665	2092429	92996	0.000401995	*
7	51233111	51233890	160875	0.000402062	*
15	17826695	17827568	43770	0.000402062	*
22	22024637	22025437	102068	0.000403651	*
9	21950380	21951048	174105	0.000405717	*
23	35556902	35557438	109309	0.000406062	*
13	8846420	8848819	28256	0.000406802	*
1	12171658	12172382	1769	0.000409109	*
13	51761850	51762271	34467	0.000409772	*
6	7486571	7487326	146470	0.000415224	*
14	28441737	28443044	38162	0.000420668	*
11	44696052	44696564	20234	0.000421237	*
5	12686794	12687285	136923	0.000422891	*
9	28493519	28494302	175122	0.000423061	*
3	1030241	1030511	121767	0.000423061	*
10	2933934	2934697	8151	0.000423606	*
7	4070408	4071939	153647	0.000423606	*
8	38412126	38412417	169135	0.000424849	*
18	44535439	44536044	69586	0.000425147	*
13	31060819	31060993	31479	0.000425147	*
14	16316133	16316780	36527	0.000425522	*
5	26204081	26204994	138990	0.000429052	*
8	42670133	42671014	169470	0.000429419	*
9	34042020	34043176	176054	0.000432535	*
21	38163351	38164154	97936	0.000434123	*
3	37588646	37589424	126804	0.000437022	*
5	20836730	20837336	138207	0.00043747	*
16	38285283	38286007	53783	0.00043747	*
7	24536762	24537449	156165	0.000439658	*
10	1800832	1801449	8024	0.000440817	*
KN150529.1	47225	47977	180830	0.000440847	*
11	10979707	10980737	15418	0.000441939	*
21	36528875	36529433	97658	0.000442391	*
15	6019672	6019895	42629	0.000447517	*
16	16968591	16969204	50805	0.000449774	*
5	61531284	61531705	143696	0.000450859	*
10	8269103	8270230	8791	0.000453041	*
7	51754778	51755556	160966	0.00045383	*
5	55788921	55789588	143124	0.000454664	*
3	62544148	62544660	129778	0.000457523	*
14	5602255	5602782	35566	0.000458802	*
2	3151274	3151599	78202	0.000458802	*
9	10005306	10006045	172473	0.0004625	*
21	2937423	2938429	93138	0.000465394	*
19	134032	134444	70783	0.000470061	*
18	22307349	22307670	66795	0.000470061	*
25	22110145	22110901	119884	0.000471294	*
17	1558357	1558900	56318	0.000471294	*
23	25603296	25604318	107454	0.000472636	*
23	43784222	43785216	110413	0.000477167	*
21	6031546	6033166	93580	0.000477167	*
21	16856688	16857520	95023	0.000477167	*
25	24311788	24312379	120157	0.000477167	*
15	43469907	43470994	47994	0.000477201	*
2	763295	763691	77925	0.000479072	*
3	26867598	26867993	125061	0.000481904	*
17	37690542	37691696	61520	0.000482195	*
4	21435630	21436411	134265	0.000483203	*
19	26112960	26113598	74183	0.000483666	*
20	42521207	42521489	91199	0.000484361	*
17	10837284	10838870	57268	0.00048616	*
14	30784719	30786146	38503	0.00048671	*
24	20357652	20358010	113759	0.00048671	*
7	35932941	35933817	158451	0.000490838	*
2	32040932	32041701	81561	0.000491042	*
23	3332161	3332681	104514	0.000494541	*
25	28050141	28050584	120342	0.000496154	*
12	12480541	12480947	22048	0.000497534	*
1	40057544	40058125	5034	0.000497548	*
24	33513175	33513622	115742	0.000497675	*
18	43952519	43952980	69454	0.0005006	*
6	9423494	9425032	146714	0.000504892	*
23	17526858	17527197	106090	0.000506878	*
1	58956380	58957924	7507	0.000511265	*
2	22457376	22458072	80211	0.000511265	*
2	58074820	58075531	85002	0.000513981	*
9	3079545	3080076	171496	0.000514314	*
12	5961468	5961943	21318	0.000515314	*
14	25456181	25456925	37648	0.000515314	*
21	39100020	39100491	98047	0.000516521	*
22	20913924	20914456	101869	0.000525742	*
1	41263283	41263945	5224	0.000525939	*
15	32562692	32563672	46281	0.000526912	*
1	18622730	18623531	2537	0.000527484	*
21	22593008	22593496	95950	0.000527484	*
24	1426976	1427844	111048	0.000530501	*
14	33849997	33850297	39105	0.000530656	*
20	7690724	7691052	86224	0.00053308	*
20	323294	323930	85316	0.000535107	*
9	9090286	9090850	172370	0.000535712	*
7	36193171	36193934	158524	0.000535712	*
7	34863098	34863872	158212	0.000537739	*
1	11522193	11522447	1695	0.000539909	*
5	65842998	65843317	144272	0.000544609	*
16	45235834	45236181	54851	0.000545266	*
19	5731348	5732291	71792	0.00054713	*
13	29239839	29240409	31106	0.000548286	*
25	18619871	18620460	119559	0.000548286	*
6	43268879	43269552	150898	0.000548367	*
6	15268505	15268890	147452	0.000555155	*
15	33963813	33965373	46535	0.000555159	*
20	20375677	20376543	87530	0.000555159	*
14	28363686	28364109	38147	0.000560085	*
3	55525605	55526392	128846	0.000566707	*
KN149921.1	606	1055	179537	0.00056842	*
17	20185809	20186423	58699	0.00056842	*
15	32558773	32559224	46280	0.000572189	*
21	26756856	26757701	96616	0.000577833	*
1	50981966	50982712	6567	0.000579137	*
18	46306853	46307346	69839	0.000579416	*
6	39272360	39272875	150363	0.000582881	*
16	23978718	23979083	51579	0.000585456	*
10	2932228	2932949	8150	0.000586976	*
10	142461	142990	7668	0.00060377	*
17	37779713	37781476	61543	0.00060377	*
19	12202163	12202701	72631	0.000609917	*
1	1686716	1687654	356	0.000611426	*
5	65844897	65845271	144273	0.000611898	*
13	39240436	39240814	32804	0.000611898	*
19	31750810	31751838	75051	0.000616356	*
18	8904866	8905220	64576	0.000616356	*
15	5812059	5812340	42617	0.000617648	*
3	57104887	57105756	129044	0.00062012	*
19	25005323	25005676	73988	0.000620603	*
22	37169792	37170099	103673	0.00062146	*
KN150405.1	46050	46789	180574	0.00062146	*
6	50605433	50605967	152020	0.00062146	*
25	18546995	18547370	119536	0.000632351	*
6	32071339	32072200	149375	0.000634158	*
23	31816827	31817624	108602	0.000640944	*
2	2106863	2107688	78086	0.000640944	*
25	7403332	7403773	118062	0.000643254	*
11	4233465	4233835	14519	0.000644275	*
5	37667542	37668768	140824	0.000649088	*
18	46301093	46301534	69837	0.000653193	*
17	23714301	23715556	59221	0.000653324	*
24	7577243	7578066	112265	0.000653917	*
6	7471236	7471512	146467	0.000654216	*
12	23469071	23469332	23048	0.000658498	*
8	31593810	31594820	168416	0.00066267	*
1	20602173	20603197	2785	0.00066267	*
7	34832959	34833869	158203	0.000664657	*
13	40726433	40727009	33020	0.000671212	*
8	6799157	6799643	164502	0.000671212	*
20	29639479	29640740	89174	0.000672156	*
2	41924243	41925072	83093	0.000673441	*
20	23696662	23696960	88158	0.000675603	*
10	37062490	37062707	12681	0.000683064	*
12	38510609	38510843	25678	0.000686928	*
5	57686053	57686745	143347	0.000688599	*
9	37280481	37280994	176547	0.000692696	*
7	65257281	65257520	162461	0.000692696	*
22	22648251	22648899	102152	0.000692696	*
10	29174615	29175247	11573	0.000692696	*
1	26411124	26412530	3491	0.000692785	*
10	2942492	2943706	8152	0.000696056	*
24	20103198	20103816	113715	0.00069695	*
14	1457766	1458612	34920	0.000697731	*
19	28297229	28297725	74450	0.000702615	*
7	9911508	9912048	154108	0.000702615	*
7	48876477	48877041	160558	0.000708307	*
20	35859797	35861449	90262	0.000710017	*
20	45804527	45805157	91566	0.000712462	*
10	1797184	1798584	8023	0.000712462	*
22	17594850	17595736	101320	0.000712462	*
13	40267882	40268357	32942	0.000720291	*
24	10429294	10430038	112657	0.000720291	*
4	16589729	16590275	133295	0.000722411	*
18	37106382	37106924	68545	0.000722411	*
24	40521970	40523029	116618	0.000722503	*
22	12782262	12782775	100524	0.000726739	*
19	43720814	43721176	76981	0.000728445	*
4	20834881	20835596	134134	0.000743604	*
KN149970.1	653	1250	179654	0.000750911	*
20	457852	458925	85340	0.000758358	*
20	26880182	26881022	88705	0.00075903	*
17	41248692	41249180	61923	0.000762296	*
17	10378377	10379213	57200	0.000762296	*
7	31404178	31404428	157483	0.000768472	*
23	41645751	41646554	110215	0.000768472	*
7	901302	901683	153532	0.000775601	*
18	27617829	27618380	67718	0.000775601	*
17	26867427	26868217	59761	0.000775601	*
5	16309403	16309900	137510	0.000780051	*
19	20206678	20207593	73415	0.000787759	*
20	53521572	53522162	92426	0.000793059	*
23	46086653	46087011	110727	0.000797198	*
19	12153550	12154661	72624	0.000797198	*
1	18664299	18664878	2545	0.000802467	*
10	15913507	15914461	9709	0.000802467	*
25	13617353	13618173	118784	0.000809821	*
1	17574215	17575740	2434	0.000811077	*
23	24156437	24157228	107222	0.000814831	*
3	13465421	13465787	122828	0.000814831	*
4	3268162	3269333	130495	0.000814831	*
24	20281070	20282059	113747	0.000814831	*
10	17092069	17092367	9815	0.000814831	*
16	23802755	23803155	51557	0.000819083	*
21	7917798	7918282	93859	0.000819214	*
7	13399657	13400442	154499	0.000823808	*
14	3485901	3486839	35255	0.000824496	*
9	42456213	42456756	177201	0.000827827	*
6	19658364	19659006	147801	0.000833204	*
11	26422669	26423165	17485	0.000833204	*
20	5174397	5174654	85994	0.000833204	*
13	9705205	9705928	28294	0.000842625	*
14	32791021	32792227	38890	0.000846653	*
17	23395496	23395862	59179	0.000854803	*
18	45561606	45562376	69708	0.000854947	*
8	13206511	13206951	165411	0.000856662	*
9	50249159	50249945	178318	0.0008588	*
8	26674200	26674459	167630	0.000867341	*
13	42753483	42754313	33233	0.000869484	*
6	50478916	50479286	151989	0.000871901	*
7	53736786	53737335	161189	0.000882631	*
22	10826539	10827570	100129	0.000891837	*
5	37085344	37086212	140735	0.000892693	*
19	5358290	5358712	71734	0.000894624	*
5	39660585	39660879	141100	0.000896044	*
20	39623270	39623920	90816	0.000896044	*
12	13117562	13118514	22075	0.000901272	*
8	47118560	47119334	169908	0.000903763	*
19	158768	160185	70790	0.000903763	*
14	30396222	30396414	38433	0.000904528	*
8	38649507	38650300	169155	0.000906363	*
16	7245894	7246338	49754	0.00090882	*
15	3512421	3513202	42357	0.00090882	*
25	18300942	18301667	119472	0.000914529	*
20	15088380	15089064	86927	0.000917255	*
2	3683727	3683945	78288	0.000917255	*
3	59001971	59002784	129264	0.000922633	*
6	56241608	56242589	152861	0.000923202	*
13	36004798	36005638	32386	0.000923202	*
4	11544722	11545286	132169	0.00092552	*
7	27127008	27128411	156647	0.000928042	*
22	24673077	24673667	102449	0.000928964	*
20	21794442	21795150	87788	0.00092924	*
8	26679127	26680449	167632	0.000941199	*
23	1075147	1075326	104149	0.000948184	*
9	10136702	10137544	172489	0.000948454	*
15	21877870	21878520	44357	0.000951676	*
15	22502732	22503981	44434	0.000951676	*
9	34126862	34127251	176071	0.000953165	*
8	9129753	9130280	164847	0.000964588	*
15	28304707	28305809	45495	0.00097317	*
21	38150838	38152144	97933	0.000977452	*
14	7090323	7090662	35778	0.000984455	*
3	34860595	34861173	126386	0.000985084	*
1	19387435	19388703	2646	0.000995349	*
20	34080510	34080830	89960	0.000996098	*
21	25760898	25761990	96491	0.00099758	*
18	15641375	15641991	65692	0.00099758	*
5	38620121	38620312	140931	0.00100097	*
8	26669546	26670536	167629	0.00100287	*
16	7482521	7483018	49792	0.00100419	*
17	10467544	10467894	57216	0.00100475	*
15	21599807	21599953	44296	0.00100831	*
24	10742750	10743200	112713	0.00101494	*
10	10383049	10384318	9122	0.00101751	*
1	56178388	56179288	7292	0.00101751	*
14	26176902	26177997	37763	0.00102352	*
24	2395381	2396338	111281	0.0010275	*
9	13008673	13008990	172864	0.00102838	*
3	32499487	32500281	125954	0.00103536	*
20	2095575	2096131	85590	0.00103536	*
18	44698957	44699611	69609	0.00103536	*
8	45279009	45279767	169751	0.00103738	*
16	24120519	24120946	51611	0.0010398	*
2	16325771	16326485	79455	0.00104008	*
23	39364853	39365494	109935	0.00104211	*
20	13805841	13806648	86792	0.00104305	*
1	47396469	47396805	6070	0.00104405	*
19	33031984	33032517	75333	0.00105571	*
12	2785520	2786102	20923	0.00105711	*
8	16450960	16451610	165917	0.00106308	*
13	9713235	9713891	28295	0.0010692	*
KN150098.1	1402	1842	179945	0.00107084	*
22	22269207	22269998	102095	0.00107084	*
17	45577202	45577473	62390	0.00107171	*
24	23712854	23713353	114288	0.00107171	*
23	43546625	43547048	110392	0.0010731	*
2	55497931	55498492	84714	0.0010731	*
10	24470914	24471243	10711	0.00107329	*
18	35446861	35447826	68354	0.00107425	*
3	51697149	51697762	128358	0.00107434	*
19	2089360	2089856	71187	0.00107516	*
15	28237818	28238611	45477	0.00107608	*
8	18667393	18667972	166314	0.00107608	*
21	43277952	43278675	98490	0.00108837	*
6	7782222	7782722	146514	0.00108912	*
11	28079620	28079979	17781	0.00108983	*
8	13000262	13001330	165379	0.00109152	*
6	57191829	57192630	152961	0.00109747	*
11	40128281	40129537	19470	0.00109747	*
12	19401879	19402728	22580	0.00109838	*
12	10564662	10565001	21887	0.00109838	*
11	8332808	8333379	15106	0.00109838	*
15	45563427	45563714	48222	0.0011027	*
18	44476757	44477336	69571	0.00110751	*
12	20751026	20752601	22723	0.00111052	*
2	43147840	43149576	83264	0.00111052	*
3	13356318	13356646	122805	0.00111562	*
22	23626423	23626946	102335	0.00113304	*
16	23911684	23912538	51573	0.00113304	*
21	38146454	38147027	97931	0.00115913	*
8	28956838	28957320	167964	0.00116868	*
23	7470825	7471297	105062	0.0011687	*
8	44127305	44127755	169660	0.00117038	*
5	64541352	64541697	144113	0.00117039	*
17	14999974	15000364	57888	0.00118546	*
15	3042748	3043348	42267	0.0011903	*
2	17370713	17371722	79576	0.00119562	*
9	53055264	53056062	178668	0.00119723	*
11	40818235	40818703	19546	0.00119723	*
14	28440538	28441317	38161	0.00119723	*
21	13668249	13668804	94609	0.00119991	*
20	29648836	29649143	89177	0.00120422	*
14	41468	42373	34596	0.00121041	*
24	33516420	33517066	115743	0.00121041	*
4	9513727	9514594	131752	0.00121269	*
5	57482879	57484157	143321	0.00121269	*
18	46346843	46347434	69848	0.00122181	*
13	18553544	18554323	29432	0.00122657	*
25	34012909	34013742	121125	0.00123324	*
11	27420010	27420647	17662	0.00124282	*
KN150523.1	14476	15126	180813	0.00124282	*
8	32116396	32117109	168458	0.00124282	*
13	33134594	33134993	31842	0.00124848	*
5	12583125	12583494	136914	0.00124988	*
1	35676027	35676517	4290	0.00124988	*
14	30832863	30833596	38516	0.00124988	*
15	32368263	32368501	46258	0.00124988	*
8	24986978	24987188	167297	0.00125101	*
19	25470425	25472293	74054	0.00125575	*
16	5859687	5860931	49532	0.00125585	*
17	42310419	42311735	62061	0.00125737	*
2	3830932	3831782	78317	0.00126387	*
22	11992420	11993487	100369	0.0012687	*
9	1686290	1686871	171201	0.0012756	*
9	48836407	48836788	178165	0.0012756	*
18	34885881	34886500	68294	0.00127993	*
8	7325353	7325789	164558	0.00128149	*
14	23928423	23929458	37367	0.00128205	*
6	54313486	54314337	152588	0.00128888	*
16	36046436	36047022	53525	0.00128888	*
14	25579528	25580493	37668	0.00128905	*
5	71668927	71669077	144970	0.00129032	*
15	16022637	16022925	43573	0.00129361	*
19	10895320	10895707	72469	0.00129549	*
21	12000217	12001222	94335	0.00130113	*
7	40895019	40895880	159382	0.00130161	*
16	23433001	23433790	51517	0.00131958	*
6	28889460	28889786	148838	0.00132052	*
12	25862640	25863407	23482	0.00132052	*
19	31267187	31268387	74970	0.00132052	*
18	43166262	43166877	69351	0.00133284	*
11	7043548	7044296	14953	0.00134471	*
5	38847533	38848276	140950	0.00135146	*
11	18717494	18718048	16135	0.00135451	*
5	4341902	4343103	136135	0.00135451	*
13	6112081	6112565	27960	0.00135525	*
12	7971519	7971929	21530	0.00136351	*
20	34542503	34544600	90059	0.00137016	*
12	1981561	1983624	20795	0.00137631	*
1	13094617	13095027	1876	0.00137858	*
21	26089613	26090527	96517	0.00138223	*
1	47808968	47809381	6166	0.00139248	*
18	46297840	46298531	69836	0.00139365	*
KZ116033.1	25	291	181262	0.00139497	*
7	33469714	33469915	157887	0.00140269	*
2	20882657	20883047	79954	0.00140288	*
16	20038055	20038958	51072	0.00140523	*
5	66190214	66190817	144316	0.0014142	*
16	38317039	38317513	53789	0.00141639	*
6	32344782	32346078	149431	0.00141676	*
11	27433503	27434156	17665	0.00141676	*
5	38895201	38895590	140964	0.00141676	*
3	26733897	26734477	125029	0.001424	*
25	17442747	17443231	119364	0.001424	*
5	40026031	40027382	141155	0.00142544	*
15	45284642	45285243	48192	0.00142883	*
19	5719012	5719370	71788	0.00142978	*
1	44631173	44631750	5599	0.00143211	*
21	25740451	25741536	96484	0.00143508	*
21	26443858	26444885	96555	0.00144568	*
20	2691438	2691694	85689	0.00144568	*
8	20637634	20638002	166732	0.00145121	*
19	12229062	12229655	72637	0.00145204	*
5	2392316	2393054	135942	0.00145331	*
17	14388009	14388208	57778	0.00145331	*
14	23960822	23961149	37372	0.00145331	*
4	28327719	28327965	135098	0.00145331	*
24	36140917	36141966	116070	0.00145331	*
12	16319434	16320402	22250	0.00145331	*
21	40465037	40465918	98163	0.00145331	*
11	6528189	6528669	14884	0.00145331	*
9	41809104	41809849	177097	0.00145529	*
18	20387031	20388067	66522	0.00145787	*
12	15126427	15126744	22161	0.0014652	*
5	24181086	24181729	138642	0.00146754	*
20	49882556	49882927	92082	0.00147517	*
6	7764214	7764630	146510	0.00147846	*
13	33591834	33592698	31913	0.00147846	*
8	39512993	39513196	169168	0.00147877	*
7	70660935	70661392	163230	0.00150331	*
13	23660654	23661728	30093	0.00150418	*
6	23992881	23993306	148089	0.00150434	*
19	34984432	34984785	75702	0.00150489	*
9	44329695	44330057	177531	0.00151556	*
5	13514851	13515418	137029	0.0015199	*
11	16465159	16465760	15904	0.00152756	*
7	38031945	38032817	158919	0.00152991	*
10	30618134	30618630	11733	0.00152995	*
19	5382772	5383110	71738	0.00153067	*
18	43145120	43146004	69344	0.00153451	*
7	18670315	18670658	155203	0.00153892	*
8	15064925	15065614	165646	0.00153892	*
6	54732646	54733102	152654	0.00154111	*
22	5787252	5788070	99726	0.00154298	*
12	33506494	33507638	24762	0.00154824	*
4	21454316	21454914	134269	0.00155769	*
21	30793825	30794954	97098	0.00155817	*
20	2938404	2939228	85727	0.0015708	*
6	2217670	2217897	145643	0.0015708	*
18	37338220	37338802	68588	0.00157244	*
16	51598092	51598553	55635	0.00157308	*
3	26763406	26764308	125034	0.00157308	*
3	18597879	18598475	123613	0.00158095	*
16	11337048	11337469	50269	0.00158983	*
25	23059286	23059700	120024	0.00159251	*
13	33047093	33048278	31833	0.00159251	*
14	8530251	8531055	36000	0.00159467	*
23	17374476	17374781	106066	0.00159467	*
13	49368330	49368778	34181	0.00159554	*
2	47254115	47254692	83876	0.00160459	*
17	2039159	2040427	56370	0.00160459	*
7	73281956	73282769	163563	0.00160687	*
18	22636497	22638586	66870	0.00161406	*
12	33873109	33874105	24799	0.00162079	*
3	46400129	46400491	127846	0.00163317	*
7	37999895	38000134	158912	0.00163513	*
20	3831805	3832324	85797	0.00165434	*
6	53425900	53426966	152472	0.00165434	*
12	22386000	22386450	22885	0.00165434	*
1	35665049	35665911	4288	0.0016587	*
1	18645422	18646322	2542	0.00168491	*
13	48469067	48469836	34009	0.00168939	*
7	59116762	59117001	161889	0.00169074	*
22	17684879	17685140	101337	0.00169205	*
7	16049042	16049500	154842	0.00169465	*
7	39423799	39425143	159148	0.00170415	*
18	45699677	45700295	69733	0.00171091	*
19	48220462	48220761	77714	0.00171091	*
16	27329702	27330556	52083	0.00171261	*
7	53114170	53115648	161100	0.00171261	*
11	6716436	6717025	14921	0.00171894	*
23	45267529	45268425	110596	0.00172116	*
23	25848140	25849090	107502	0.00172301	*
15	42582272	42583581	47882	0.00172301	*
3	22618009	22618982	124201	0.00172301	*
11	11741825	11742752	15498	0.00172301	*
23	35403777	35404138	109291	0.00172301	*
20	9620533	9622397	86500	0.00172501	*
8	26687248	26689006	167633	0.0017353	*
3	13469248	13469753	122829	0.0017353	*
10	10771992	10772417	9151	0.00173596	*
19	46892756	46893169	77430	0.00173596	*
9	34129689	34130609	176072	0.00173693	*
9	21214511	21215047	173966	0.00173903	*
16	25710682	25711006	51868	0.00173903	*
8	16444830	16446025	165915	0.00174184	*
4	24846707	24847024	134773	0.00174354	*
16	11004060	11005051	50216	0.00174354	*
16	28754077	28755089	52282	0.00174495	*
3	60209381	60209696	129397	0.00174495	*
24	4520733	4521077	111730	0.00174495	*
13	36412608	36413129	32446	0.00174968	*
9	25420686	25422410	174564	0.00174968	*
KN149882.1	5360	7314	179457	0.00175194	*
11	37890867	37891631	19138	0.00175194	*
21	38555891	38556506	97991	0.00176136	*
16	5442045	5442554	49480	0.00176136	*
7	1483368	1484721	153573	0.00176136	*
7	19592976	19593444	155326	0.00176281	*
6	48081842	48082723	151630	0.00176887	*
6	39305146	39306983	150367	0.00177036	*
21	32021580	32021811	97223	0.00177158	*
1	30990591	30990831	3856	0.00177177	*
23	33916426	33917473	109022	0.00177177	*
25	11135187	11137214	118464	0.00178248	*
8	8655340	8655557	164773	0.00178732	*
1	1795784	1798578	375	0.00179636	*
4	77943897	77945117	135585	0.00179935	*
17	43348421	43349170	62131	0.00179969	*
17	32403980	32404913	60689	0.00180246	*
1	56179690	56180709	7293	0.0018049	*
15	43350882	43351428	47964	0.0018049	*
12	45154849	45155237	26397	0.00182401	*
7	52467389	52467864	161007	0.00183673	*
6	6831473	6833833	146375	0.00183673	*
5	54750261	54750579	143007	0.00183673	*
19	2042310	2043172	71179	0.00183728	*
7	40746730	40747004	159363	0.00183942	*
2	21525365	21525795	80039	0.00185434	*
12	10621827	10622117	21892	0.00186509	*
8	47112208	47112416	169907	0.00187807	*
23	44808854	44809239	110549	0.00188642	*
11	4226932	4227386	14517	0.00189068	*
17	21716787	21717162	58930	0.00189364	*
3	13993285	13993878	122880	0.00189364	*
19	19460630	19461837	73301	0.00189364	*
5	42998611	42999662	141572	0.00189663	*
14	41674491	41675617	40506	0.00189676	*
9	7358253	7359543	172084	0.00190114	*
20	43925140	43925605	91345	0.00190191	*
14	34700159	34700778	39257	0.00190191	*
3	55522360	55523196	128845	0.00190386	*
7	24646300	24647626	156177	0.00190757	*
21	37557045	37557377	97830	0.00190757	*
18	36629639	36630835	68470	0.00190757	*
11	27488673	27489773	17675	0.00190911	*
19	11327456	11327894	72546	0.00190911	*
1	13981409	13981756	2011	0.00190911	*
23	2827778	2828032	104423	0.0019127	*
13	7386817	7388126	28051	0.0019127	*
3	49789613	49789998	128208	0.00191873	*
5	35457638	35458469	140448	0.00191873	*
23	27203600	27204529	107730	0.00191873	*
8	28428785	28429329	167878	0.00191873	*
25	19335869	19336310	119616	0.00192834	*
12	7949728	7950174	21526	0.00193045	*
24	8037918	8038487	112330	0.00193342	*
7	38007935	38009044	158914	0.00193362	*
10	13325357	13326086	9430	0.00193366	*
7	6662077	6662947	153797	0.00193536	*
9	39840514	39840853	176886	0.00193536	*
20	7873445	7874096	86263	0.00194244	*
17	26972824	26975306	59778	0.00195308	*
8	31094923	31095354	168347	0.00196232	*
14	51073040	51073600	41625	0.00196391	*
19	30715155	30715885	74865	0.00196953	*
23	9744044	9744658	105325	0.00197578	*
17	19620344	19620999	58627	0.00198819	*
17	51897351	51898195	63030	0.00199815	*
11	23449113	23449672	16931	0.00200064	*
21	38002760	38003032	97903	0.00202793	*
23	9882323	9883284	105349	0.00203737	*
7	41174741	41175322	159431	0.00203748	*
22	11741916	11742421	100332	0.00204763	*
12	29908365	29908750	24155	0.00204774	*
3	60186483	60186908	129392	0.00204883	*
9	41885949	41886918	177121	0.00205335	*
18	48904627	48904985	70309	0.00205386	*
16	27284369	27284901	52075	0.00205386	*
15	40069896	40070334	47579	0.00205507	*
20	5175854	5176510	85995	0.00205507	*
25	11119988	11120396	118457	0.00205507	*
6	40530438	40530898	150527	0.0020674	*
21	7920003	7920452	93860	0.00206766	*
17	38206375	38207342	61644	0.00206923	*
1	39958565	39959092	5017	0.00207306	*
23	1017327	1017919	104142	0.00207306	*
19	40190937	40191343	76436	0.00208178	*
13	22083381	22084012	29876	0.00208178	*
7	25038112	25038542	156249	0.00209018	*
4	18271368	18272432	133665	0.00209212	*
14	20643276	20643746	36952	0.00209764	*
8	49290493	49290911	170207	0.00211104	*
5	40020096	40020939	141153	0.00211178	*
12	48804911	48805563	26844	0.00211773	*
23	2492964	2493636	104361	0.00212479	*
13	4852209	4852599	27684	0.00212814	*
16	19679586	19679844	51018	0.00212831	*
15	17820787	17821243	43769	0.00212956	*
25	23598358	23599052	120075	0.00213796	*
4	21459122	21460217	134271	0.00213796	*
12	836095	836968	20593	0.00213827	*
5	51815372	51816086	142765	0.00213919	*
12	36044435	36045941	25231	0.00214139	*
10	36640519	36640764	12624	0.00214139	*
11	28060210	28060760	17779	0.00214139	*
20	730706	731059	85379	0.00215042	*
3	32502110	32502489	125955	0.00215223	*
19	41758366	41758978	76673	0.00216052	*
21	6062101	6063141	93586	0.00216445	*
7	67108171	67109260	162683	0.002176	*
21	4122527	4123581	93327	0.002176	*
11	13151627	13152502	15593	0.002176	*
15	47449356	47449565	48456	0.00218052	*
19	22485667	22486013	73726	0.00218094	*
20	2363480	2363788	85638	0.0021899	*
4	4077607	4078320	130618	0.00219471	*
4	5250266	5250514	130839	0.00219736	*
KN149782.1	23129	23307	179291	0.00219788	*
1	6072627	6073019	1035	0.0022055	*
18	15693803	15694462	65699	0.0022055	*
12	5822035	5822307	21294	0.00220798	*
12	45357190	45357707	26429	0.00221151	*
10	26747161	26747799	11022	0.00221635	*
10	31817836	31818562	11955	0.00222303	*
4	2015778	2017183	130215	0.0022371	*
4	18699520	18700208	133750	0.00224155	*
9	9988898	9989881	172470	0.00224155	*
23	10355858	10358832	105424	0.00224341	*
2	43635656	43636710	83373	0.00225709	*
22	29631758	29632596	102762	0.00225814	*
9	52789446	52790118	178647	0.00226079	*
3	13079358	13079785	122749	0.00226297	*
16	40927086	40927573	54287	0.00226564	*
2	28448173	28449067	81065	0.00227073	*
9	9636523	9636792	172424	0.00227073	*
2	24337824	24338516	80412	0.00227073	*
22	24372003	24372191	102402	0.00227073	*
11	19271493	19271687	16243	0.00227244	*
12	7988454	7988777	21535	0.0022757	*
4	11958850	11959151	132263	0.0022757	*
1	119744	120342	36	0.0022757	*
2	37085473	37085740	82311	0.0022757	*
5	32733384	32733735	140011	0.00228145	*
2	56910369	56911848	84862	0.00228686	*
20	43378377	43379092	91296	0.00228729	*
4	11642624	11643170	132198	0.00228842	*
7	38094154	38094922	158931	0.00229733	*
3	49546158	49546953	128196	0.00229919	*
3	49520606	49521365	128194	0.0023035	*
5	18072168	18072408	137802	0.0023138	*
23	15153535	15154330	105862	0.00232252	*
15	34982266	34982961	46680	0.00233177	*
25	24504685	24504947	120168	0.0023323	*
11	34160070	34161427	18617	0.0023323	*
3	26204547	26205142	124932	0.00233786	*
7	13410787	13411651	154501	0.00234129	*
3	19838819	19839959	123742	0.00235733	*
13	40355350	40355857	32956	0.00236179	*
1	24455909	24457270	3239	0.00236561	*
10	37926952	37927293	12802	0.00236561	*
16	7171836	7172142	49746	0.00237045	*
19	11002670	11003221	72479	0.00237045	*
13	4299514	4300076	27585	0.0023713	*
9	12493128	12493661	172777	0.00237189	*
22	26400383	26400882	102531	0.00237189	*
17	24073152	24073533	59292	0.00237546	*
9	41497611	41497922	177053	0.00237546	*
6	206751	208123	145244	0.00237748	*
21	10878130	10881623	94172	0.0023775	*
5	6682089	6683001	136396	0.0023898	*
14	26260696	26260941	37776	0.00238996	*
23	24081071	24081638	107209	0.00239593	*
19	29884644	29884937	74734	0.00239727	*
13	37025064	37025425	32566	0.00239727	*
1	53842144	53842578	7022	0.00240052	*
10	38707552	38708262	12943	0.00241341	*
5	55879631	55879997	143129	0.00241478	*
24	7781896	7782728	112293	0.00241478	*
3	3655929	3656671	121915	0.00241486	*
3	41490464	41491403	127312	0.00241602	*
14	38654789	38655159	39944	0.00244145	*
13	3007291	3007792	27337	0.00245501	*
12	30258465	30258861	24215	0.00245609	*
22	10537283	10537852	100064	0.00246389	*
21	43268680	43269787	98488	0.00246389	*
8	51840948	51841833	170526	0.00246539	*
16	26599263	26599727	51966	0.00246896	*
9	33490444	33490779	175935	0.00247013	*
16	29283649	29284024	52383	0.00247454	*
7	50603812	50604538	160793	0.00247454	*
1	55126582	55127210	7213	0.00247454	*
17	42299016	42299723	62060	0.00247467	*
5	43474938	43475717	141599	0.00247707	*
16	35906745	35907013	53486	0.00247707	*
6	43653034	43653665	150972	0.0024772	*
2	10317054	10318204	79032	0.0024772	*
10	44917761	44918152	13718	0.00248032	*
23	27466942	27467972	107781	0.00248754	*
25	19781762	19782372	119653	0.00249051	*
10	20236260	20237225	10136	0.00249051	*
11	40641968	40643068	19504	0.00249347	*
1	24832316	24832839	3266	0.00249389	*
17	24847357	24849299	59458	0.00249406	*
21	3696793	3697001	93265	0.00249406	*
5	44857453	44859662	141856	0.00250183	*
2	37535032	37535898	82386	0.00251577	*
5	66419825	66420858	144328	0.00251706	*
20	48258022	48258733	91874	0.0025239	*
7	11118310	11118712	154214	0.0025311	*
1	20591792	20592725	2782	0.00254837	*
3	43061076	43061591	127519	0.00254837	*
10	32450063	32450855	12077	0.00255494	*
10	32825806	32826512	12128	0.00255811	*
20	15449876	15450653	86981	0.00255997	*
6	7393144	7393809	146456	0.00256114	*
17	16096272	16096567	58035	0.00256143	*
5	29789470	29790426	139497	0.00256205	*
5	9817236	9820537	136701	0.00257521	*
8	26323056	26323397	167533	0.00259302	*
8	43771491	43772440	169635	0.00259302	*
14	26215370	26215730	37768	0.00259302	*
23	37661744	37662340	109670	0.0025948	*
18	35455340	35456481	68356	0.0025948	*
16	19418315	19419008	50983	0.00260071	*
11	16223384	16223898	15844	0.00260071	*
14	7294624	7295203	35819	0.00260249	*
20	37155635	37156205	90441	0.00260676	*
22	23638299	23639067	102336	0.00260676	*
12	6168187	6168981	21341	0.00260676	*
7	70656096	70656575	163229	0.00260899	*
23	25239040	25239902	107399	0.00261523	*
3	3821532	3822313	121930	0.00261697	*
5	37671507	37673186	140825	0.00261874	*
5	20389844	20390469	138148	0.00263061	*
3	48845866	48846832	128151	0.00267434	*
12	5626372	5626989	21251	0.00268288	*
11	34732793	34733503	18701	0.00268331	*
6	27951135	27951520	148704	0.00268331	*
3	55960240	55960813	128924	0.00269343	*
7	71486925	71487117	163325	0.0027016	*
13	39198482	39199149	32796	0.00271257	*
25	15992311	15993022	119125	0.00271694	*
1	1557623	1558209	329	0.00271727	*
20	45688495	45689397	91557	0.00272129	*
2	17804277	17805454	79635	0.00272129	*
15	12435665	12436964	43252	0.00272139	*
9	32876669	32877670	175837	0.00273811	*
13	10660064	10660523	28462	0.00274489	*
11	31637748	31638192	18283	0.00274717	*
21	21017475	21018431	95764	0.00274717	*
7	34771700	34772093	158186	0.0027544	*
3	39376523	39376821	126971	0.00275697	*
3	40630980	40631996	127200	0.00276521	*
21	19636588	19637165	95495	0.00276582	*
24	26733289	26734258	114782	0.00276835	*
21	9401104	9401775	93941	0.00277611	*
23	13737200	13737695	105678	0.00277988	*
5	52326183	52326730	142859	0.00277988	*
14	37610748	37612026	39788	0.00277988	*
2	7657178	7657464	78762	0.00278083	*
23	44613278	44613649	110524	0.00278083	*
16	54458315	54459400	56012	0.00278083	*
4	25026835	25027696	134807	0.00278125	*
18	475255	475969	63453	0.00278125	*
24	2438350	2438763	111299	0.00278125	*
25	16072354	16072704	119142	0.00278997	*
8	4609638	4610484	164308	0.00278997	*
19	32904242	32904601	75311	0.00279476	*
11	22911864	22912092	16845	0.00279626	*
13	23031756	23032341	30022	0.00279731	*
17	38204569	38205050	61643	0.00279731	*
11	6584593	6585358	14895	0.00281072	*
10	15037578	15037839	9605	0.00281072	*
5	64872500	64872836	144162	0.00281527	*
23	39506710	39507318	109968	0.00281599	*
7	22858628	22859780	155896	0.00281599	*
7	30236089	30236399	157208	0.00282539	*
13	4671315	4671940	27656	0.00284393	*
13	8179515	8180171	28169	0.00285074	*
17	22487178	22487838	59042	0.00285074	*
17	32407312	32407739	60690	0.00285074	*
18	16070441	16070868	65748	0.00285941	*
8	44287967	44288488	169688	0.00285941	*
16	22307710	22308189	51345	0.00286125	*
3	12929242	12930176	122717	0.00286727	*
2	41839166	41839518	83079	0.00286841	*
22	11977059	11977554	100365	0.00287664	*
3	45254345	45254687	127719	0.00288911	*
19	3615366	3616234	71484	0.00289429	*
5	19251842	19252653	137935	0.00289429	*
3	23340503	23341053	124365	0.00290178	*
9	30659346	30660504	175389	0.00290178	*
24	35619115	35620071	116013	0.00290292	*
23	20461405	20461614	106495	0.00290898	*
16	29602225	29602559	52435	0.00291792	*
21	19851853	19852621	95542	0.00293067	*
23	4065814	4066023	104610	0.00293074	*
4	2087721	2088111	130239	0.00294288	*
13	47610061	47611173	33888	0.00294979	*
17	34987850	34988512	61116	0.00294979	*
19	24872043	24872636	73978	0.00294979	*
21	666282	666763	92771	0.00295194	*
19	46737063	46737357	77414	0.00296323	*
5	38878361	38878743	140960	0.00296323	*
10	20599875	20600263	10204	0.00296323	*
24	35567160	35567750	116006	0.00296323	*
20	53001627	53001943	92369	0.00296323	*
3	59247816	59248260	129278	0.00296534	*
17	30443315	30445292	60422	0.00297301	*
18	15854299	15854521	65721	0.00297301	*
17	1089909	1090298	56251	0.00297324	*
24	25759681	25760193	114642	0.00298224	*
12	10401398	10403337	21867	0.00298342	*
1	53843690	53844492	7023	0.00298842	*
13	35371479	35371895	32293	0.00298842	*
9	44814114	44814466	177583	0.00299372	*
11	28082678	28083119	17782	0.00300575	*
22	25830567	25830933	102487	0.00300657	*
15	9523822	9524417	43012	0.00302171	*
10	9605608	9605999	8983	0.00302687	*
3	34576235	34576585	126341	0.00302969	*
18	10735281	10736095	64864	0.00302969	*
15	8681406	8682418	42906	0.00303484	*
10	33340239	33340917	12224	0.00303484	*
2	37616730	37617225	82404	0.00303558	*
1	40528646	40528868	5120	0.00303651	*
13	7196051	7196650	28036	0.00303651	*
9	12663409	12664205	172799	0.00303651	*
14	30285475	30286152	38413	0.00303651	*
4	21666043	21666315	134326	0.00303651	*
3	30018920	30019835	125546	0.00304249	*
17	38444228	38444524	61696	0.00304658	*
13	42438422	42439123	33189	0.00304658	*
16	22380821	22382213	51355	0.0030493	*
9	41823108	41823321	177099	0.00305043	*
11	13112705	13113247	15585	0.00305452	*
15	36437523	36437965	46947	0.00305452	*
14	5485272	5486107	35552	0.00306272	*
20	2091732	2092333	85588	0.00306425	*
3	24525023	24525215	124664	0.00306425	*
17	42546150	42546809	62086	0.00306729	*
18	44475466	44476301	69570	0.00306942	*
3	32958495	32958755	126042	0.00308555	*
24	9386490	9388471	112532	0.00309278	*
18	46340186	46341197	69846	0.00309278	*
24	6067983	6068917	112064	0.00309403	*
16	35904410	35905319	53485	0.00309403	*
6	46578146	46578875	151454	0.00311302	*
8	31304557	31305078	168372	0.00311396	*
16	45718196	45718539	54900	0.00311396	*
20	288848	289686	85305	0.00311491	*
6	50525632	50526414	152003	0.0031212	*
10	31812775	31814083	11953	0.0031212	*
1	44529512	44530063	5584	0.00312525	*
17	41615628	41615903	61981	0.00312525	*
7	40727520	40727888	159358	0.00312525	*
4	5327420	5328290	130852	0.00312605	*
7	34797550	34798488	158195	0.00312612	*
3	33394679	33395743	126138	0.00313926	*
12	23596378	23597025	23076	0.00313926	*
9	497392	497897	170999	0.00314008	*
15	31908	32641	41852	0.00315066	*
13	36421729	36422769	32447	0.00315066	*
7	31826903	31827506	157581	0.00315957	*
15	8997274	8998973	42964	0.00316078	*
KN150098.1	27796	28191	179948	0.00316228	*
11	626928	627377	13951	0.00318949	*
14	27925846	27926110	38045	0.00319379	*
9	21751413	21752167	174076	0.0031966	*
5	5125230	5125577	136231	0.00320134	*
4	25020945	25021218	134805	0.00321212	*
20	20383550	20384918	87532	0.00321212	*
15	46372875	46373176	48298	0.00321212	*
8	1766066	1766285	163941	0.00321295	*
7	65744493	65745052	162511	0.00321363	*
4	5592118	5593611	130893	0.00321417	*
17	26922606	26922979	59769	0.00321417	*
6	30389332	30390040	149052	0.00321417	*
6	8420786	8421805	146597	0.00322531	*
9	21744223	21744508	174074	0.00322818	*
9	11308221	11308997	172634	0.00322879	*
4	20891123	20891445	134154	0.00322879	*
25	33999952	34000401	121122	0.00322879	*
18	36679727	36680288	68484	0.00322879	*
24	39274267	39274924	116478	0.00322879	*
16	43448317	43449547	54626	0.00323258	*
8	3368871	3369307	164148	0.00324095	*
7	73138144	73138524	163541	0.0032466	*
11	6745419	6746149	14928	0.00324771	*
24	35108126	35108345	115944	0.00326064	*
19	22386640	22387277	73713	0.00326966	*
18	45705251	45706070	69735	0.00327774	*
1	39956044	39956255	5016	0.00328415	*
24	19326993	19328490	113559	0.00328506	*
7	56705569	56705858	161680	0.00328627	*
19	22393879	22394152	73715	0.00329303	*
9	28169627	28170811	175037	0.00331551	*
23	11346727	11347697	105534	0.00331961	*
11	45168792	45169226	20335	0.00334342	*
20	20468777	20469536	87548	0.00334342	*
16	45746644	45747301	54907	0.00334691	*
7	14109072	14109529	154596	0.00335447	*
13	27776285	27776938	30839	0.00335447	*
8	39520701	39521265	169171	0.00335447	*
13	4639558	4640619	27649	0.0033681	*
5	16208614	16209207	137485	0.0033681	*
7	64737273	64737668	162425	0.00336872	*
1	19845162	19845850	2700	0.00336872	*
10	15529896	15530521	9670	0.00337689	*
23	972420	972658	104137	0.00338139	*
24	26605127	26605559	114763	0.00338178	*
12	10632635	10632970	21895	0.00338625	*
13	42597524	42597907	33207	0.0033918	*
5	26216312	26216713	138994	0.00341382	*
23	4414035	4415051	104649	0.00342879	*
19	523783	524500	70872	0.0034302	*
1	26413915	26414752	3493	0.00343348	*
22	11755827	11756405	100335	0.00344722	*
7	24187693	24188095	156093	0.00344722	*
4	21618776	21620021	134314	0.00345416	*
15	23631975	23632745	44585	0.00345416	*
4	13601412	13602169	132601	0.00345416	*
25	22184689	22185681	119894	0.00346326	*
1	31022197	31022561	3861	0.0034659	*
14	33854972	33855363	39107	0.00346638	*
18	14862965	14864205	65589	0.00347817	*
23	26774152	26774460	107648	0.00348076	*
3	53386903	53387532	128525	0.00348076	*
13	23630755	23631286	30091	0.00351542	*
2	3183904	3184336	78209	0.00352803	*
14	21187239	21187676	37029	0.00352803	*
20	51927333	51927602	92264	0.00352803	*
17	43366487	43367589	62134	0.00352803	*
13	37254233	37254830	32591	0.00352867	*
18	15526592	15526989	65672	0.00353236	*
20	28388945	28389373	88955	0.00353622	*
6	2097490	2098052	145621	0.00353622	*
1	56176512	56177713	7291	0.0035403	*
9	8617614	8618480	172298	0.00354326	*
21	38010747	38010986	97904	0.00356389	*
13	25961006	25961602	30501	0.00356692	*
13	4921082	4921399	27695	0.00357587	*
17	27199491	27200651	59821	0.00357612	*
23	45397591	45398930	110606	0.00357612	*
16	28219848	28220644	52189	0.00357874	*
4	21445834	21446936	134267	0.00357963	*
23	988991	989339	104140	0.00359921	*
1	16597717	16597891	2306	0.00359921	*
23	36429182	36430278	109517	0.00360279	*
9	47101006	47101459	177948	0.00361157	*
18	14853415	14853951	65587	0.00361157	*
5	58798590	58799240	143430	0.00362344	*
9	20532666	20533201	173835	0.00362454	*
18	25429039	25429379	67413	0.00363482	*
5	40744884	40745403	141292	0.00364822	*
1	10691949	10692543	1622	0.00366298	*
9	18805287	18805860	173679	0.00366404	*
15	39575021	39575640	47489	0.00366404	*
16	39536524	39537101	53993	0.0036828	*
15	46329185	46330077	48292	0.00368887	*
19	33251351	33251943	75370	0.00369309	*
17	22562070	22562456	59052	0.00370055	*
20	45304458	45304735	91511	0.00370055	*
19	8945869	8946145	72268	0.00370055	*
17	27333288	27334215	59859	0.00370055	*
2	19181217	19181637	79799	0.00370055	*
20	31026932	31027240	89456	0.00370055	*
7	60304060	60304408	162001	0.00371199	*
3	55468617	55468941	128833	0.0037262	*
20	6865801	6866358	86154	0.0037275	*
7	20113149	20113892	155379	0.00373163	*
2	57093257	57093597	84885	0.00373248	*
9	18007569	18008150	173580	0.00373755	*
20	22683185	22683695	87961	0.00373755	*
21	7912977	7914004	93857	0.00374257	*
15	2846517	2846875	42244	0.00374615	*
6	56182691	56183420	152844	0.00374962	*
7	10570804	10571481	154156	0.00374962	*
12	22830463	22831458	22939	0.00374962	*
11	11718106	11718902	15491	0.00375901	*
24	23722755	23723044	114290	0.00377159	*
18	36966143	36966332	68514	0.00378757	*
20	15098043	15098427	86928	0.00378757	*
23	31893648	31894841	108619	0.00379498	*
14	14587637	14588066	36363	0.00379761	*
9	17305878	17306476	173495	0.00380499	*
11	42438982	42439419	19818	0.0038092	*
15	8884594	8885474	42947	0.00381501	*
2	12339679	12340403	79212	0.00381501	*
9	8623638	8624525	172299	0.00381775	*
1	24926270	24927034	3286	0.00382385	*
5	33253275	33253868	140095	0.00382478	*
2	49462422	49462592	84161	0.00382645	*
25	18607401	18608762	119555	0.00382645	*
1	28081712	28081929	3640	0.00382866	*
19	42551244	42552370	76791	0.00383235	*
23	35135701	35136095	109257	0.00383377	*
18	17339264	17339939	65943	0.00384312	*
14	967534	967847	34836	0.00384527	*
21	36566204	36566690	97665	0.00384605	*
10	27078565	27079077	11077	0.00386015	*
14	49748063	49748633	41530	0.00387587	*
21	38170092	38170923	97937	0.00388442	*
2	31347669	31348451	81458	0.00389883	*
25	2076559	2077417	117277	0.00389931	*
7	1515095	1515495	153580	0.00389931	*
7	37955193	37955771	158901	0.00390883	*
17	39825485	39826076	61844	0.00390883	*
7	51033118	51033887	160843	0.00391587	*
5	37751783	37752140	140843	0.00393386	*
25	17194002	17194471	119324	0.00393386	*
1	18607972	18608871	2532	0.00395124	*
10	38622796	38623142	12937	0.00395721	*
3	49796592	49796891	128209	0.00395721	*
3	47401598	47402113	127963	0.00395811	*
4	28189523	28190065	135068	0.00395811	*
4	11573937	11574108	132176	0.00396745	*
24	19888104	19888682	113674	0.00397733	*
14	44049272	44049625	40827	0.00397841	*
20	22362566	22363582	87888	0.00397894	*
16	4281740	4282021	49314	0.00398777	*
18	22272860	22273168	66785	0.00399663	*
5	62482715	62483172	143824	0.00400394	*
7	60082105	60082965	161968	0.0040112	*
6	49061733	49063609	151784	0.00402334	*
14	31102458	31103183	38572	0.00403057	*
7	7397064	7397485	153866	0.00403886	*
3	34586201	34586666	126344	0.00404031	*
6	36877850	36878824	150082	0.0040423	*
2	9562260	9562771	78936	0.00404379	*
13	36010175	36010931	32388	0.00404387	*
18	45683953	45684369	69732	0.00406277	*
16	54351096	54352109	55984	0.00406277	*
5	3005453	3005937	136001	0.00406478	*
4	27707161	27707811	135015	0.00408076	*
3	30031230	30032472	125550	0.00408542	*
9	39973712	39974111	176909	0.00408575	*
23	41654506	41654916	110218	0.00408645	*
23	2404144	2405677	104342	0.00411002	*
9	30068879	30069372	175301	0.00411633	*
7	26482264	26482664	156513	0.00411633	*
24	33347306	33347894	115724	0.00411857	*
1	24705022	24705381	3260	0.00411934	*
4	2451117	2451376	130303	0.0041206	*
24	41206244	41207019	116691	0.00412734	*
9	44374963	44375297	177539	0.00413089	*
8	26712477	26713252	167640	0.00413229	*
11	13275763	13276650	15606	0.00413229	*
17	45575423	45576380	62389	0.00413703	*
2	741999	742301	77918	0.00414293	*
18	25169541	25170732	67391	0.00414784	*
7	15453798	15454957	154743	0.00415591	*
22	10092413	10093203	100000	0.00415946	*
16	5383491	5383823	49472	0.00415946	*
16	21456379	21457292	51263	0.00417085	*
25	14590904	14591431	118918	0.00418084	*
20	38778575	38778994	90686	0.00418429	*
22	22225979	22226924	102090	0.00418648	*
3	18631969	18632963	123617	0.00418749	*
1	8130593	8131777	1330	0.00418749	*
13	42666879	42667481	33219	0.00418749	*
14	8657620	8658218	36021	0.00418939	*
1	44194241	44194748	5562	0.00419044	*
5	17244096	17244366	137605	0.00419935	*
22	17714620	17715169	101344	0.00421818	*
10	5583670	5584246	8540	0.00422056	*
15	43839496	43840171	48038	0.00423637	*
7	69799958	69800898	163133	0.00423637	*
4	16489615	16490505	133266	0.00424277	*
5	9861402	9861907	136708	0.00424889	*
12	24836646	24836863	23280	0.00424889	*
18	7155951	7156177	64310	0.00425068	*
1	45984254	45984513	5778	0.004262	*
11	23019237	23020370	16860	0.00427096	*
6	39317166	39317477	150369	0.00427096	*
22	38229132	38229569	103832	0.00427096	*
21	32040297	32040521	97227	0.00427096	*
3	36349994	36350166	126659	0.00428395	*
8	4832801	4834002	164340	0.00429748	*
9	9023392	9024595	172357	0.00433908	*
3	48894308	48895083	128158	0.00434741	*
1	10270040	10270454	1561	0.00434741	*
6	56320367	56321023	152878	0.00435576	*
24	33547562	33548187	115747	0.00437606	*
21	30513345	30514546	97069	0.00437773	*
KN150495.1	20237	21252	180742	0.00438105	*
20	47077617	47079136	91707	0.00438105	*
4	77427568	77428610	135548	0.00438105	*
23	27414942	27415769	107766	0.00438105	*
1	5336036	5336208	854	0.00438287	*
1	18616656	18618088	2535	0.00440653	*
20	9634456	9634808	86504	0.00441503	*
20	29084332	29085674	89101	0.00441909	*
14	5695732	5696266	35585	0.0044253	*
12	11528438	11529285	22000	0.0044253	*
6	40311591	40312293	150504	0.00442803	*
6	49201419	49201877	151813	0.00442803	*
3	15718319	15720598	123123	0.00443711	*
13	45843172	45843415	33613	0.00443711	*
1	25829395	25829580	3416	0.00443711	*
7	34794184	34796998	158194	0.00444361	*
7	37748723	37748938	158863	0.00444718	*
8	14557027	14557260	165570	0.00447346	*
7	72448026	72448543	163444	0.00447443	*
13	37138787	37141120	32578	0.00447443	*
16	39727	40791	48590	0.00447581	*
12	17726513	17727753	22399	0.00447581	*
2	32640640	32640825	81659	0.00448088	*
21	606247	606732	92750	0.00448264	*
15	46341011	46341831	48293	0.00448925	*
18	7539094	7539287	64354	0.00450358	*
24	25136292	25137925	114558	0.00451243	*
20	28560167	28560383	88977	0.00451765	*
16	41072963	41073765	54303	0.0045264	*
14	25421493	25421673	37642	0.00452873	*
12	37296884	37297813	25477	0.00453499	*
7	20199999	20200577	155404	0.00453499	*
23	22585006	22585500	106799	0.00453499	*
20	6142067	6142543	86079	0.00453581	*
23	33547879	33548379	108957	0.00454489	*
13	11315846	11316070	28550	0.00454489	*
24	20251123	20251359	113744	0.00454917	*
9	48369892	48370834	178138	0.00454954	*
17	10846603	10846918	57270	0.00457106	*
17	10382832	10383294	57201	0.00457952	*
4	16694221	16696112	133321	0.00459614	*
22	22047834	22048155	102071	0.00459807	*
7	6590223	6590521	153781	0.00460726	*
4	28247030	28247579	135073	0.00460726	*
15	43362230	43362875	47966	0.00462532	*
25	14589283	14589973	118917	0.00464649	*
22	24660717	24661426	102447	0.00465076	*
23	10182075	10182321	105392	0.00465076	*
11	33974467	33975248	18586	0.00466472	*
16	46308470	46309077	54990	0.00466571	*
10	17030435	17030789	9808	0.00468249	*
KN150098.1	25098	25681	179947	0.00468384	*
14	26744885	26745291	37885	0.00468384	*
25	32171047	32171572	120801	0.00468898	*
14	37698071	37698807	39816	0.00469834	*
12	9423473	9423721	21781	0.00470124	*
11	35579473	35580342	18853	0.00470124	*
16	38201331	38202181	53771	0.00470124	*
23	24039186	24039642	107201	0.00472151	*
5	30680293	30681109	139656	0.00473191	*
17	37437277	37437820	61480	0.00473707	*
7	29605956	29606277	157130	0.00473731	*
4	1528075	1528543	130122	0.00474668	*
11	11532363	11532520	15472	0.00474668	*
7	36913060	36913595	158655	0.0047486	*
3	55513216	55513850	128843	0.00475091	*
5	45918622	45918880	141976	0.00475208	*
7	20938997	20939738	155527	0.00475648	*
7	24353236	24354000	156128	0.00475648	*
22	22720699	22721582	102169	0.00475648	*
23	8262970	8263234	105153	0.00475666	*
9	30353536	30354061	175344	0.00475685	*
23	25856437	25856918	107503	0.0047628	*
13	2398410	2398788	27287	0.00476325	*
16	1136348	1136764	48878	0.00476803	*
11	34123879	34124572	18610	0.00477379	*
2	55547510	55548344	84723	0.00477379	*
3	17175537	17176509	123356	0.00479496	*
22	10060953	10062377	99994	0.00480756	*
10	25662555	25663112	10842	0.00480756	*
25	17857963	17859036	119411	0.00480756	*
6	9420888	9421712	146712	0.00480866	*
10	22153037	22153886	10416	0.00481354	*
17	21387544	21387816	58874	0.00481702	*
4	3078546	3079012	130451	0.00483208	*
5	29293140	29293340	139426	0.00484074	*
2	37671537	37672512	82414	0.00484074	*
2	42467832	42468185	83156	0.00484074	*
18	35435302	35435776	68351	0.00484074	*
3	47383736	47385021	127958	0.00486042	*
13	40374067	40374790	32960	0.00486107	*
12	38711054	38711600	25717	0.00487025	*
24	17709398	17709890	113423	0.00487025	*
14	14644608	14645068	36371	0.0048831	*
11	6749715	6749900	14930	0.0048831	*
21	25756946	25757448	96489	0.00488402	*
5	27469735	27470207	139157	0.0048947	*
10	42157274	42157660	13300	0.00491654	*
5	13727391	13727740	137056	0.00491654	*
23	44589831	44590246	110516	0.00493746	*
23	13822551	13822941	105698	0.00493988	*
19	31748666	31749439	75050	0.00494066	*
25	32271293	32271831	120816	0.0049429	*
9	28995826	28996449	175199	0.00497881	*
18	46353491	46354633	69850	0.00498354	*
1	44534265	44534722	5586	0.00499823	*
19	41782903	41783269	76678	0.00500885	*
12	5647287	5648125	21256	0.00503674	*
11	16271485	16271879	15856	0.00504642	*
8	23152069	23152606	167043	0.0050563	*
23	5595175	5596292	104805	0.00505639	*
10	19492722	19493203	10076	0.00505913	*
17	26779069	26779739	59747	0.00505923	*
23	21761618	21762166	106665	0.00506653	*
18	16116160	16117045	65754	0.00507613	*
3	23202522	23202966	124332	0.00507613	*
16	1358158	1359155	48927	0.00507638	*
7	40794155	40795466	159370	0.00509214	*
1	8171159	8171465	1339	0.00510064	*
13	9719114	9719932	28296	0.00510178	*
9	26289818	26290308	174787	0.00510178	*
12	35418238	35418972	25130	0.00510178	*
5	2408096	2408823	135945	0.00510267	*
3	32769568	32770071	126006	0.00510622	*
23	31762620	31763855	108590	0.00510783	*
23	43810240	43810590	110419	0.0051082	*
6	12455486	12456110	147076	0.00512197	*
6	30947860	30948351	149169	0.00513204	*
18	12355789	12356315	65173	0.00514842	*
1	56184650	56186021	7295	0.00515477	*
13	40789023	40790128	33033	0.00516272	*
25	14592824	14593038	118919	0.00516272	*
4	18915723	18916392	133785	0.00517488	*
8	32409367	32409790	168486	0.00517766	*
20	22365299	22366293	87889	0.00517766	*
10	7386100	7386591	8699	0.00517766	*
16	52378664	52378889	55744	0.00518252	*
8	32705555	32706421	168526	0.00518489	*
4	8804290	8804595	131617	0.00519225	*
14	24085589	24086077	37386	0.00519568	*
11	11744214	11744922	15499	0.00519943	*
18	2572903	2573495	63737	0.00519943	*
24	32545079	32545636	115644	0.00519943	*
16	22568112	22568572	51362	0.00519943	*
18	25701470	25702131	67456	0.00519943	*
13	42709658	42710433	33227	0.00519943	*
19	30977831	30978635	74926	0.00519973	*
20	13346690	13346915	86743	0.00520244	*
3	11104490	11105383	122498	0.00520326	*
24	4457832	4458353	111707	0.00520326	*
23	10349549	10355118	105423	0.00520326	*
5	13476464	13477407	137023	0.00520326	*
5	41907856	41908104	141463	0.0052036	*
15	47754300	47755072	48518	0.00521733	*
19	22584079	22584656	73752	0.00521733	*
14	12059024	12059381	36236	0.00521733	*
8	53237524	53237933	170743	0.00522343	*
18	2957556	2958272	63805	0.00522721	*
19	5771484	5772198	71798	0.005251	*
3	30922005	30923068	125694	0.00526057	*
7	19848523	19849039	155345	0.00526057	*
20	49991050	49991761	92092	0.00526904	*
16	53155829	53156199	55828	0.00528246	*
7	32374438	32375170	157660	0.00529834	*
15	37412982	37413208	47101	0.00530164	*
8	33003908	33004296	168545	0.00531144	*
10	26659292	26659678	11011	0.0053121	*
3	1554120	1554419	121858	0.0053121	*
5	51082225	51083465	142710	0.0053121	*
13	12789922	12790363	28704	0.00532433	*
12	13297854	13298887	22086	0.00533376	*
5	40994364	40994824	141328	0.00534414	*
21	25753444	25754098	96487	0.00534493	*
24	2322160	2322326	111263	0.00535191	*
20	3858622	3859414	85799	0.00535529	*
23	27479107	27480696	107785	0.00535703	*
5	50953024	50954074	142691	0.00537338	*
12	25340217	25341143	23365	0.0053781	*
23	29730890	29731347	108234	0.00537875	*
11	361322	362632	13907	0.00537875	*
21	13561801	13562126	94602	0.00539414	*
12	17154563	17156362	22312	0.00539599	*
8	25693913	25694584	167425	0.00539599	*
22	24454024	24454678	102426	0.00540614	*
7	6641314	6642004	153790	0.0054102	*
21	32565783	32566125	97308	0.00541948	*
21	22546889	22547978	95943	0.00542735	*
2	11732150	11732522	79164	0.00542735	*
2	19192811	19193264	79800	0.00543054	*
21	11171864	11172650	94210	0.00543189	*
2	25577586	25578087	80650	0.00543283	*
18	18089161	18089377	66127	0.00543869	*
6	30968643	30969507	149176	0.00545685	*
13	36024413	36026287	32390	0.00546249	*
15	38878093	38879009	47265	0.00548265	*
16	41478	42353	48591	0.00548265	*
23	6613424	6613990	104963	0.00549589	*
14	26277445	26278222	37782	0.00549589	*
7	10790132	10790520	154177	0.00549637	*
23	35189372	35193671	109267	0.00549873	*
21	20032449	20032889	95587	0.00551459	*
23	9112575	9113270	105241	0.00551459	*
3	18244570	18245857	123551	0.00553833	*
5	35226474	35227169	140413	0.00554039	*
17	26907022	26907607	59766	0.00554606	*
6	28801984	28802598	148815	0.00555914	*
7	40736169	40736521	159359	0.00556623	*
11	41148867	41149304	19591	0.00557013	*
19	22489844	22490924	73729	0.00557013	*
8	28678961	28679211	167930	0.0055703	*
22	32964245	32964422	103130	0.0055706	*
19	7642474	7643559	72081	0.00557108	*
9	54101587	54102254	178780	0.00557599	*
18	3519446	3520256	63888	0.00557599	*
7	49848421	49849075	160719	0.00557599	*
11	25594226	25595004	17338	0.00559255	*
12	31210967	31211519	24391	0.0055936	*
14	1851548	1852458	34988	0.0055936	*
25	18015941	18016556	119430	0.00559852	*
13	47662047	47662414	33894	0.00559983	*
20	37779464	37779747	90535	0.00562525	*
16	14624108	14624716	50615	0.00564148	*
5	72460561	72462163	145172	0.00564392	*
17	37830167	37831655	61557	0.00564392	*
14	6459599	6460246	35673	0.00564392	*
5	3027735	3029053	136005	0.00564392	*
12	18305380	18305603	22459	0.00564392	*
5	22931212	22931402	138483	0.00564392	*
22	10646229	10648227	100092	0.00566251	*
24	4465113	4465557	111710	0.00566629	*
23	25105628	25106171	107377	0.00567535	*
8	12504280	12505091	165337	0.00568641	*
2	20923511	20923991	79961	0.00570512	*
18	34791709	34792528	68278	0.00570611	*
25	10672282	10672622	118392	0.00572024	*
20	32133583	32134624	89631	0.00572317	*
1	51250309	51250871	6614	0.0057348	*
1	44214958	44215469	5566	0.00573561	*
23	10841085	10841595	105501	0.00573769	*
16	30864096	30864643	52660	0.00574393	*
14	41474414	41475257	40478	0.00576088	*
1	59415803	59417187	7610	0.00576517	*
1	41477785	41479573	5241	0.00576735	*
16	28759202	28759712	52284	0.0057845	*
21	20790050	20790274	95747	0.00578948	*
3	19697617	19697835	123720	0.00578948	*
5	20360239	20360746	138138	0.00578948	*
23	26863933	26864925	107660	0.00580286	*
18	928325	929287	63537	0.00582291	*
14	33271482	33271893	39001	0.00582444	*
13	22022806	22023321	29862	0.00582573	*
8	24252496	24253119	167236	0.00582573	*
3	11093682	11094104	122495	0.00582797	*
3	26885351	26885979	125064	0.00584124	*
5	58557438	58557999	143409	0.00584124	*
3	40234025	40234383	127103	0.00585175	*
6	7702436	7703171	146499	0.00585726	*
2	2057349	2057923	78074	0.0058595	*
15	40118097	40118411	47590	0.00585962	*
18	46864136	46865011	69918	0.00585962	*
23	21543845	21544383	106645	0.00587119	*
11	5409260	5409542	14731	0.00587514	*
8	1264815	1265129	163871	0.00587629	*
13	21843205	21843522	29821	0.00587629	*
5	51046135	51047089	142705	0.00588838	*
12	5662282	5663489	21259	0.00589453	*
8	49215062	49216467	170196	0.00589977	*
[truncated: 3,695 more rows]

## Sheet: Table S8
Supplmental Table 8: Anatomical enrichment analysis of Sox17N>Sox17E DARs at 28 hpf (left) and 48 hpf (right)
DARs were calculated using DiffBind version 3.0.15 (Stark and Brown, 2011) with the DESeq2 option (Love, Huber and Anders, 2014), on the broad peaks files (.broadPeak) produced by MACS2. R version 4.2.1 (R Core Team, 2021) was used for this processing.
Transcription start sites <=1kb from DARs were annotated using ChIPSeeker and anatomical enrichment analysed using FishEnrichr Anatomy GeneRIF Predicted Z-score
Term	P-value	Adjusted P-value	Old P-value	Old Adjusted P-value	Z-score	Combined Score	Genes		Term	P-value	Adjusted P-value	Old P-value	Old Adjusted P-value	Z-score	Combined Score	Genes
lateral_zone_olfactory_bulb	0.00896743	0.0561527	0.0155899	0.111715	-7.76186	36.5906	elavl3		ventral_thalamus	4.10557e-10	9.85336e-08	1.00864e-07	2.42075e-05	-2.57193	55.5884	ascl1a;her15.2;her15.1;her4.2;nxph1;pax6a;lhx5;dmbx1a;bhlhe22;her12
lens_capsule	0.0104544	0.0561527	0.0177996	0.111715	-5.27376	24.0522	elavl3		hindbrain_neural_tube	2.71922e-09	3.26307e-07	8.41483e-07	0.000100978	-0.927068	18.2845	ascl1a;prdm12b;nfixa;rfx4;atoh7;pcdh1g30;pax6a;lhx5;lhx1a;olig2;her13;bhlhe22;her12
spinal_cord_neural_plate	0.00735215	0.0561527	0.0152651	0.111715	-2.7965	13.7386	robo3;rfx4		optic_tectum	7.84385e-09	6.27508e-07	3.65787e-06	0.000273061	-0.931386	17.383	ascl1a;her15.2;her15.1;atoh7;nxph1;pax6a;crb2a;six3b;her4.2;olig2;elavl3;pou3f3a;dmbx1a;cahz;bhlhe22;her12
adenohypophysis	0.00465947	0.0561527	0.00982776	0.111715	-2.20957	11.8628	her4.2;her4.3		dorsal_telencephalon	2.9892e-08	1.79352e-06	4.58416e-06	0.000273061	-1.30277	22.5714	ascl1a;adcyap1r1a;six3b;pcdh1g30;her4.2;elavl3;lhx5;barhl2;npas4a;lhx1a;adcyap1b
retinal_photoreceptor_layer	0.00945503	0.0561527	0.0194739	0.111715	-2.04105	9.51374	her4.2;elavl3		anterior_neural_tube	3.83531e-08	1.84095e-06	5.68878e-06	0.000273061	-1.12727	19.2498	crb1;ascl1a;nfixa;six3b;olig2;pax6a;crb2a;lhx5;lhx1a;bhlhe22;her12
ganglion	0.00768587	0.0561527	0.0159349	0.111715	-1.84051	8.9603	her4.2;elavl3		ventral_telencephalon	1.55939e-07	6.23756e-06	1.55824e-05	0.000623298	-1.69572	26.5783	hbae3;six3b;pcdh1g30;olig2;pax6a;elavl3;barhl2;npas4a;adcyap1b;her12
whole_organism	0.00206938	0.0561527	0.0052252	0.111715	-1.35688	8.38622	her4.2;elavl3;her4.3		retinal_inner_nuclear_layer	2.51923e-07	8.63735e-06	2.35992e-05	0.000809115	-1.43807	21.8503	ascl1a;eno2;atoh7;her4.2;scn8aa;olig2;pax6a;elavl3;barhl2;bhlhe22
photoreceptor_inner_segment_layer	0.0104544	0.0561527	0.0177996	0.111715	-1.7155	7.82393	elavl3		retinal_photoreceptor_layer	4.14192e-07	1.24258e-05	2.92491e-05	0.000877473	-2.05369	30.1829	ascl1a;eno2;atoh7;her4.2;olig2;pax6a;crb2a;elavl3;bhlhe22
photoreceptor_outer_segment_layer	0.0104544	0.0561527	0.0177996	0.111715	-1.69642	7.7369	elavl3		retinal_outer_nuclear_layer	1.83297e-06	4.85593e-05	8.44418e-05	0.00225178	-2.07297	27.383	ascl1a;eno2;atoh7;olig2;pax6a;elavl3;barhl2;bhlhe22
diencephalon	0.00164909	0.0561527	0.00418594	0.111715	-1.11126	7.12045	her4.2;elavl3;her4.3		midbrain_neural_tube	2.17968e-06	4.85593e-05	9.80233e-05	0.00235256	-1.9921	25.9697	atoh7;six3b;her4.2;pax6a;lhx5;her13;lhx1a;her12
corpus_cerebelli	0.0102089	0.0561527	0.0209762	0.111715	-1.3467	6.17396	her4.2;elavl3		retina	2.22564e-06	4.85593e-05	0.000192938	0.00386258	-0.898858	11.6991	crb1;ascl1a;dscama;her4.2;olig2;crb2a;elavl3;olfm1b;her12;insm1a;her4.3
cerebellum	0.0102089	0.0561527	0.0209762	0.111715	-1.34662	6.1736	her4.2;elavl3		spinal_cord_neural_tube	3.67846e-06	6.79101e-05	0.000193129	0.00386258	-1.68148	21.0403	prdm12b;rfx4;atoh7;pcdh1g30;olig2;pax6a;lhx5;lhx1a;her12
somatic_stem_cell	0.0122061	0.0561527	0.0249422	0.111715	-1.31371	5.78798	her4.2;elavl3		midbrain_hindbrain_boundary	2.46413e-06	4.92825e-05	0.000210686	0.00388959	-0.722858	9.33475	ascl1a;six3b;her4.2;pax6a;elavl3;lhx5;dmbx1a;irx1b;her13;adcyap1b;her12
retina	0.00283671	0.0561527	0.00711274	0.111715	-0.986349	5.78504	her4.2;elavl3;her4.3		optic_fiber_layer	6.90375e-05	0.000974647	0.000699597	0.0119931	-1.9485	18.6683	six3b;pax6a;dmbx1a
notochord	0.0130492	0.0561527	0.0266108	0.111715	-1.24663	5.40915	her4.2;elavl3		hindbrain_neural_plate	2.41188e-05	0.000413464	0.00078064	0.0124902	-0.939936	9.99389	ascl1a;rfx4;pax6a;lhx5;irx1b;her13;lhx1a;her12
retinal_inner_nuclear_layer	0.0141379	0.0561527	0.0287608	0.111715	-1.23585	5.26336	her4.2;elavl3		retinal_ganglion_cell_layer	5.57725e-05	0.00089236	0.00127175	0.0190763	-1.7592	17.23	eno2;atoh7;six3b;olig2;pax6a;elavl3;dmbx1a
posterior_neural_plate	0.0107912	0.0561527	0.0221348	0.111715	-1.13851	5.15635	her4.2;irx1b		midbrain_neural_plate	8.17191e-05	0.000980629	0.00138695	0.0195805	-2.19334	20.6442	six3b;pax6a;lhx5;dmbx1a;her13;her12
axis	0.0136978	0.0561527	0.0278923	0.111715	-1.10688	4.74908	her4.2;her4.3		posterior_neural_plate	6.71078e-05	0.000974647	0.00149169	0.0198892	-1.13851	10.9402	ascl1a;ndr2;six3b;her4.2;olig2;pax6a;irx1b
embryonic_cell	0.0111875	0.0561527	0.0229221	0.111715	-1.05061	4.72034	her4.2;elavl3		neural_plate	7.4323e-05	0.000980629	0.00205542	0.0257154	-1.37562	13.0782	ascl1a;ndr2;six3b;her4.2;olig2;pax6a;lhx5;lhx1a
dorsal_telencephalon	0.0148095	0.0561527	0.0300846	0.111715	-1.10143	4.63977	her4.2;elavl3		ectomesenchyme	7.8029e-05	0.000980629	0.00214295	0.0257154	-1.33696	12.6456	ascl1a;ndr2;six3b;her4.2;olig2;pax6a;lhx5;lhx1a
midbrain_hindbrain_boundary	0.00292183	0.0561527	0.00732147	0.111715	-0.774243	4.51813	her4.2;elavl3;irx1b		forebrain_neural_tube	0.000153664	0.00167634	0.00239069	0.0273221	-2.09801	18.4221	rfx4;atoh7;six3b;pax6a;lhx5;lhx1a
hindbrain_neural_plate	0.0145841	0.0561527	0.0296405	0.111715	-0.876664	3.70638	rfx4;irx1b		forebrain_midbrain_boundary	0.000164038	0.0017117	0.00252919	0.0275912	-2.26988	19.7829	six3b;pax6a;elavl3;lhx5;dmbx1a;adcyap1b
hindbrain	0.00969629	0.0561527	0.0236899	0.111715	-0.739858	3.42999	rfx4;her4.2;elavl3		spinal_cord_neural_plate	0.000174957	0.00174957	0.00267367	0.0278992	-2.46473	21.3223	ascl1a;rfx4;olig2;pax6a;lhx5;lhx1a
lateral_line	0.0136411	0.0561527	0.0330755	0.111715	-0.621379	2.66862	robo3;plp1a;elavl3		embryonic_structure	0.000124289	0.00142044	0.00319067	0.0294523	-0.713925	6.42026	epor;hbbe1.1;her4.2;olig2;elavl3;syn2a;alas2;sncb
infundibulum	0.0171457	0.0624105	0.0346757	0.112696	-0.892302	3.6281	her4.2;her4.3		ganglion	0.000198515	0.00190574	0.00298121	0.0294523	-1.7263	14.7161	ascl1a;prune2;her4.2;pax6a;elavl3;olfm1b
ventral_horn_spinal_cord	0.0178571	0.0624999	0.028783	0.111715	-2.98934	12.0332	elavl3		central_canal	0.000373815	0.00320413	0.00310742	0.0294523	-2.44409	19.2882	ascl1a;ndrg4;olig2;pax6a
midbrain_neural_keel	0.0208032	0.0636111	0.0331461	0.111715	-4.26274	16.5081	elavl3		forebrain_neural_keel	0.000528241	0.00372876	0.00332035	0.0295143	-3.99384	30.1374	six3b;pax6a;lhx5
ventral_zone_olfactory_bulb	0.0193312	0.0636111	0.0309667	0.111715	-3.37991	13.3372	elavl3		telencephalon_diencephalon_boundary	0.000629447	0.00397546	0.00383155	0.0328419	-2.95732	21.7974	ascl1a;pax6a;lhx5
floor_plate	0.0225234	0.0636111	0.0451706	0.127476	-0.784798	2.9769	robo3;rfx4		shield	0.000255008	0.00235392	0.0046952	0.0388568	-1.41906	11.7416	hbae3;ndr2;lmo2;pcdh1g30;pax6a;lhx5;lhx1a
hypothalamus	0.0217172	0.0636111	0.0436032	0.127476	-0.770692	2.95148	her4.2;her4.3		adenohypophysis	0.000482704	0.00372876	0.00499268	0.0399414	-1.97942	15.1151	ascl1a;six3b;her4.2;pax6a;her4.3
embryonic_structure	0.0225234	0.0636111	0.0451706	0.127476	-0.628578	2.38432	her4.2;elavl3		anterior_neural_plate	0.000285205	0.00253516	0.0064578	0.0408835	-0.701307	5.72428	ascl1a;ndr2;six3b;her4.2;pax6a;lhx5;irx1b;lhx1a
somite	0.0204013	0.0636111	0.0410405	0.127476	-0.581283	2.26244	her4.2;elavl3		cerebellum	0.000441816	0.00353453	0.00593298	0.0408835	-1.19406	9.22367	ascl1a;prune2;her4.2;olig2;elavl3;adcyap1b
midbrain	0.0230678	0.0636111	0.0462277	0.127476	-0.573592	2.16205	her4.2;elavl3		corpus_cerebelli	0.000441816	0.00353453	0.00593298	0.0408835	-1.18832	9.17931	ascl1a;prune2;her4.2;olig2;elavl3;adcyap1b
hypophysis	0.0241727	0.0646976	0.0483708	0.129463	-0.64853	2.41417	her4.2;her4.3		neural_tube	0.000515742	0.00372876	0.00677474	0.0408835	-0.684913	5.18473	pcdh1g30;her4.2;olig2;pax6a;crb2a;her12
									forebrain_neural_plate	0.000515742	0.00372876	0.00677474	0.0408835	-0.667116	5.05001	ascl1a;rfx4;ndr2;six3b;pax6a;lhx5
									presumptive_forebrain	0.000669323	0.00411891	0.00661819	0.0408835	-2.86178	20.9175	six3b;olig2;pax6a;elavl3;dmbx1a
									presumptive_telencephalon	0.000884348	0.00482372	0.00649933	0.0408835	-2.74191	19.2774	six3b;olig2;pax6a;elavl3
									dorsal_root	0.00096141	0.00501605	0.00698427	0.0408835	-1.58047	10.9797	lingo1b;scn8aa;olig2;elavl3
									optic_cup	0.00096141	0.00501605	0.00698427	0.0408835	-1.44775	10.0577	lmo2;six3b;pax6a;crb2a
									spinal_nerve_root	0.00115501	0.00589794	0.00634241	0.0408835	-2.30027	15.5582	scn8aa;olig2;elavl3
									floor_plate_spinal_cord_region	0.001327	0.00663502	0.00620377	0.0408835	-6.73153	44.5953	ascl1a;pax6a
									posterior_neural_tube	0.000598953	0.0038851	0.00770056	0.0412038	-0.878927	6.52193	crb1;ascl1a;six3b;her4.2;pax6a;crb2a
									inferior_lobe	0.00184614	0.00835986	0.00789739	0.0412038	-7.82642	49.2647	ascl1a;pax6a
									intervening_zone	0.00184614	0.00835986	0.00789739	0.0412038	-3.96595	24.9643	her13;her12
									vitreous	0.00184614	0.00835986	0.00789739	0.0412038	-2.58467	16.2696	pax6a;her12
									thalamic_eminence	0.00184614	0.00835986	0.00789739	0.0412038	-2.54071	15.9929	ascl1a;pax6a
									neuroectoderm	0.000692228	0.00415337	0.00871503	0.0445023	-0.824327	5.99747	ndr2;six3b;her4.2;olig2;pax6a;lhx5
									somatic_stem_cell	0.000725694	0.00420054	0.00907367	0.0453684	-0.951286	6.87626	ascl1a;atoh7;her4.2;olig2;elavl3;her12
									ventral_root	0.00211821	0.00907806	0.0106015	0.0519258	-2.00759	12.3611	scn8aa;olig2;elavl3
									floor_plate	0.000735095	0.00420054	0.0115334	0.0553601	-0.720775	5.20076	ascl1a;rfx4;ndr2;olig2;pax6a;lhx1a;her12
									diencephalon	0.000792817	0.00442502	0.0122909	0.0578393	-0.749596	5.35206	six3b;her4.2;pax6a;elavl3;adcyap1b;sncb;her4.3
									intermediate_cell_mass_of_mesoderm	0.00260936	0.0106143	0.0126727	0.0584895	-2.57578	15.3224	tal1;lmo2;her12
									ciliary_zone	0.00147892	0.00724369	0.0130899	0.0586456	-1.67961	10.9451	atoh7;her4.2;olig2;pax6a;insm1a
									floor_plate_neural_tube	0.00200936	0.00876813	0.0131953	0.0586456	-1.99537	12.3911	rfx4;olig2;pax6a;lhx1a
									neuroepithelial_cell	0.000548325	0.00375994	0.0136741	0.0591753	-0.518973	3.89679	her15.2;her15.1;atoh7;her4.2;olig2;pax6a;crb2a;elavl3;barhl2
									anterior_neural_keel	0.00388204	0.0147887	0.0140541	0.0591753	-7.40042	41.0827	pax6a;lhx5
									corneal_stroma	0.00388204	0.0147887	0.0140541	0.0591753	-3.50676	19.4674	crb1;crb2a
									neural_keel	0.00228701	0.00946348	0.0147556	0.0610576	-1.03602	6.2995	six3b;pax6a;elavl3;lhx5
									hindbrain	0.000577574	0.00385049	0.0172209	0.0700511	-0.570106	4.2511	ascl1a;prdm12b;prune2;rfx4;her4.2;olig2;pax6a;elavl3;adcyap1b;sncb
									glial_cell	0.0021814	0.00918484	0.0182554	0.0718244	-1.35903	8.32782	ascl1a;ndrg4;atoh7;her4.2;olig2
									retinal_neural_layer	0.00291946	0.0116779	0.0182168	0.0718244	-1.79393	10.47	six3b;her4.2;pax6a;bhlhe22
									ventral_horn_spinal_cord	0.00562259	0.0198444	0.0189981	0.0735411	-2.17907	11.2897	olig2;elavl3
									retinal_outer_plexiform_layer	0.00327648	0.0128911	0.0201223	0.0766564	-1.64373	9.40373	atoh7;elavl3;barhl2;bhlhe22
									axial_hypoblast	0.00197533	0.00876813	0.021204	0.0795149	-0.842339	5.24526	tal1;ndr2;lmo2;six3b;pax6a;lhx1a
									midbrain_neural_keel	0.00765576	0.0255192	0.0245629	0.0906937	-3.70848	18.0688	elavl3;lhx5
									central_pretectum	0.00877842	0.0277497	0.027565	0.100236	-2.57448	12.1914	pax6a;barhl2
									neuron_neural_crest_derived	0.00551204	0.0197446	0.0314719	0.111149	-0.983299	5.11396	ascl1a;six3b;elavl3;her12
									midbrain_hindbrain_boundary_neural_plate	0.00748738	0.0255192	0.0314923	0.111149	-2.23458	10.9372	lhx5;her13;her12
									presumptive_brain	0.00460661	0.0172748	0.0344155	0.119706	-0.534856	2.87766	six3b;olig2;pax6a;elavl3;dmbx1a
									forebrain_midbrain_boundary_neural_plate	0.0125537	0.0354457	0.0373909	0.124636	-4.00835	17.5475	six3b;lhx5
									sensory_canal	0.0125537	0.0354457	0.0373909	0.124636	-2.28007	9.98155	ndrg4;olig2
									upper_rhombic_lip	0.0125537	0.0354457	0.0373909	0.124636	-1.48984	6.52213	pcdh1g30;olig2
									brain_nucleus	0.00962925	0.0300132	0.039164	0.128758	-1.66019	7.70817	prune2;elavl3;adcyap1b
									habenula	0.0075705	0.0255192	0.0412807	0.13036	-1.27013	6.20268	pax6a;lhx1a;adcyap1b;sncb
									megakaryocyte_erythroid_progenitor_cell	0.0102147	0.0314297	0.041218	0.13036	-1.79936	8.24814	hbae3;lmo2;alas2
									nephron_progenitor	0.0139433	0.0384642	0.0409235	0.13036	-0.726776	3.10534	irx3b;lhx1a
									blastomere	0.00469167	0.0173231	0.043511	0.135424	-0.432789	2.3206	tal1;ndr2;atoh7;crb2a;elavl3;her12
									retinal_inner_plexiform_layer	0.0082399	0.026724	0.0443699	0.135424	-1.27022	6.09551	atoh7;elavl3;barhl2;bhlhe22
									corpuscles_of_Stannius	0.0153962	0.0419896	0.044577	0.135424	-1.6215	6.76754	irx3b;her12
									tegmentum	0.0114464	0.0339917	0.0454872	0.136461	-1.15338	5.15571	prune2;elavl3;her12
									neural_rod	0.0120929	0.035394	0.0477015	0.141338	-0.665218	2.93703	her4.2;pax6a;bhlhe22
									whole_organism	0.00591361	0.0205691	0.052571	0.153866	-0.302474	1.55184	ascl1a;her15.2;her15.1;her4.2;elavl3;her4.3
									lens_placode	0.0201217	0.0513746	0.0562194	0.158737	-3.14596	12.288	pax6a;elavl3
									rhombic_lip	0.0201217	0.0513746	0.0562194	0.158737	-1.97262	7.70495	pcdh1g30;olig2
									ventral_wall_of_dorsal_aorta	0.0201217	0.0513746	0.0562194	0.158737	-1.39086	5.43263	tal1;lmo2
									anterior_lateral_plate_mesoderm	0.0087874	0.0277497	0.0589831	0.164604	-0.440223	2.08421	ndr2;lmo2;six3b;pax6a;her12
									hindbrain_neural_keel	0.0218149	0.0551113	0.0603134	0.166382	-2.70443	10.3449	pax6a;lhx5
									anterior_axial_hypoblast	0.0172	0.0463821	0.0646492	0.176316	-2.22784	9.05137	ndr2;six3b;pax6a
									non_neural_ectoderm	0.00795298	0.0261468	0.0668098	0.180161	-0.0206559	0.0998548	ascl1a;six3b;pax6a;elavl3;irx1b;lhx1a
									optic_vesicle	0.0114722	0.0339917	0.0734268	0.195805	-0.379612	1.69604	crb1;ablim1a;six3b;pax6a;crb2a
									presumptive_spinal_cord	0.0291444	0.0699465	0.077648	0.204786	-1.88901	6.67858	pax6a;lhx1a
									lateral_line	0.00512574	0.0186391	0.0803159	0.20952	-0.241583	1.27398	adcyap1r1a;prune2;lingo1b;six3b;plp1a;pax6a;elavl3;adcyap1b;her12
									somite	0.0135436	0.0377961	0.0840533	0.214604	0.24953	-1.07344	her15.1;her4.2;pax6a;elavl3;her12
									optic_stalk	0.0233381	0.0583454	0.0839986	0.214604	-0.678188	2.54841	atoh7;six3b;pax6a
									spinal_cord_neural_keel	0.0468512	0.106078	0.0893843	0.225813	-1.79056	5.4805	lhx5
									embryonic_cell	0.0194187	0.0512141	0.0912441	0.22811	-0.298722	1.17742	epor;her4.2;olig2;elavl3
									mesodermal_cell	0.0108041	0.0328226	0.102002	0.241162	-0.0944818	0.427797	tal1;ndr2;lmo2;her4.2;pax6a;elavl3;her12
									midbrain	0.0175314	0.0467505	0.103495	0.241162	-0.170898	0.691069	ascl1a;her4.2;pax6a;elavl3;sncb
									cerebellar_plate	0.0394702	0.0919693	0.101195	0.241162	-2.09655	6.7765	olig2;dmbx1a
									lateral_zone_olfactory_bulb	0.0559561	0.116778	0.103499	0.241162	-5.38902	15.5376	elavl3
									gonad_primordium	0.0559561	0.116778	0.103499	0.241162	-5.14247	14.8267	her12
									endolymph	0.0559561	0.116778	0.103499	0.241162	-4.35011	12.5422	cahz
									molecular_layer_valvula_cerebelli	0.0559561	0.116778	0.103499	0.241162	-2.10835	6.07877	olig2
									myocardial_precursor	0.0416791	0.0961826	0.10612	0.244893	-0.62956	2.00059	tal1;crb2a
									notochord	0.0252378	0.0618069	0.113239	0.253833	-0.0482388	0.177491	her4.2;pax6a;elavl3;lhx1a
									extension	0.0439335	0.100419	0.11111	0.253833	-1.3855	4.32981	olig2;elavl3
									lens_capsule	0.0649744	0.124751	0.117398	0.253833	-3.5836	9.79672	elavl3
									medial_valvula_cerebelli	0.0649744	0.124751	0.117398	0.253833	-2.95212	8.07041	olig2
									Purkinje_cell_layer_valvula_cerebelli	0.0649744	0.124751	0.117398	0.253833	-2.65927	7.2698	olig2
									photoreceptor_inner_segment_layer	0.0649744	0.124751	0.117398	0.253833	-0.260668	0.712605	elavl3
									photoreceptor_outer_segment_layer	0.0649744	0.124751	0.117398	0.253833	-0.226665	0.619649	elavl3
									axis	0.0273868	0.0663922	0.121058	0.257564	-0.512806	1.84492	ascl1a;her4.2;olig2;her4.3
									anterior_presumptive_neural_plate	0.0485742	0.108952	0.12127	0.257564	-3.56164	10.7728	six3b;pax6a
									epiphysis	0.0387146	0.0910932	0.129018	0.263303	-0.913413	2.97	ascl1a;prune2;elavl3
									primitive_heart_tube	0.0509585	0.112202	0.126434	0.263303	-1.08538	3.2309	tal1;alas2
									taste_bud	0.053384	0.116474	0.131651	0.263303	-0.631662	1.85092	ascl1a;pax6a
									floor_plate_rhombomere_2	0.073907	0.133366	0.131085	0.263303	-3.62485	9.44253	ascl1a
									hypodermis	0.073907	0.133366	0.131085	0.263303	-3.1255	8.14176	ndrg4
									presumptive_floor_plate	0.073907	0.133366	0.131085	0.263303	-1.99835	5.20559	lhx1a
									valvula_cerebelli	0.073907	0.133366	0.131085	0.263303	-0.845683	2.20296	olig2
									pretectum	0.0558498	0.116778	0.136918	0.271573	-1.21852	3.51553	pax6a;barhl2
									epithalamus	0.0336385	0.0799331	0.143017	0.273192	-0.287051	0.9737	ascl1a;six3b;pax6a;sncb
									presumptive_structure	0.0583549	0.118688	0.142232	0.273192	-1.22186	3.47156	pax6a;dmbx1a
									acid_secreting_cell	0.0583549	0.118688	0.142232	0.273192	-1.19086	3.3835	aqp1a.1;irx3b
									floor_plate_rhombomere_region	0.0827548	0.144271	0.144564	0.273192	-2.9654	7.3894	ascl1a
									presumptive_cephalic_mesoderm	0.0827548	0.144271	0.144564	0.273192	-1.65467	4.12324	lmo2
									outer_limiting_membrane	0.0827548	0.144271	0.144564	0.273192	-0.0894632	0.222931	crb1
									dorsal_thalamus	0.0608982	0.121796	0.14759	0.274586	-1.26944	3.5526	pax6a;lhx5
									thalamus	0.0608982	0.121796	0.14759	0.274586	-0.475601	1.33099	pax6a;lhx5
									midbrain_hindbrain_boundary_neural_tube	0.0660961	0.125897	0.158429	0.288052	-1.61195	4.3791	pax6a;her13
									forerunner_cell_group	0.0915184	0.151465	0.157838	0.288052	-3.95937	9.46771	ndr2
									presumptive_neural_retina	0.0915184	0.151465	0.157838	0.288052	-2.17122	5.19185	pax6a
									preoptic_area	0.0507315	0.112202	0.161656	0.291709	-0.562879	1.67806	ascl1a;six3b;pax6a
									otic_vesicle	0.0251469	0.0618069	0.163866	0.293491	0.482159	-1.7758	aqp1a.1;tal1;lmo2;pcdh1g30;pax6a;her12
									forebrain_ventricle	0.071436	0.133366	0.169415	0.299403	-1.80489	4.76302	pax6a;neurod6b
									sclera	0.100199	0.160318	0.170909	0.299403	-1.45469	3.34665	pax6a
									cranial_nerve_root	0.100199	0.160318	0.170909	0.299403	-1.347	3.0989	lingo1b
									optic_primordium	0.0769108	0.137751	0.18053	0.313966	0.0094479	-0.0242349	six3b;pax6a
									granular_layer_corpus_cerebelli	0.108797	0.170072	0.183781	0.31732	-2.01514	4.47014	olig2
									lateral_floor_plate	0.0853604	0.144271	0.197406	0.33131	-1.328	3.26804	olig2;her12
									granulocyte_monocyte_progenitor_cell	0.117313	0.178196	0.196457	0.33131	-2.84219	6.09057	lmo2
									ventral_zone_olfactory_bulb	0.117313	0.178196	0.196457	0.33131	-0.351606	0.753462	elavl3
									neurectodermal_cell	0.117313	0.178196	0.196457	0.33131	-0.0673374	0.144298	pou3f3a
									cerebral_spinal_fluid	0.125748	0.188622	0.208939	0.348232	-1.24145	2.57412	tal1
									prechordal_plate	0.0725463	0.133366	0.21667	0.358626	-0.274517	0.720203	ndr2;atoh7;six3b
									hypothalamus	0.058123	0.118688	0.220363	0.358752	-0.296861	0.844627	her4.2;olig2;adcyap1b;her4.3
									presumptive_midbrain	0.0970348	0.157354	0.220197	0.358752	-0.994043	2.31879	pax6a;dmbx1a
									neurogenic_placode	0.134103	0.198671	0.221231	0.358752	0.17297	-0.347522	her12
									exocrine_pancreas	0.0847807	0.144271	0.245569	0.377798	0.100726	-0.248561	urod;pax6a;alas2
									muscle_precursor_cell	0.0847807	0.144271	0.245569	0.377798	0.16039	-0.395792	tal1;crb2a;pou3f3a
									renal_glomerulus	0.0847807	0.144271	0.245569	0.377798	0.173354	-0.427784	irx3b;ralgps1;lhx1a
									epiblast	0.0829818	0.144271	0.241398	0.377798	0.427679	-1.06455	ndr2;lmo2;her12
									telencephalon	0.106069	0.168587	0.237444	0.377798	0.0784847	-0.176093	six3b;adcyap1b
									atrial_myocardium	0.109129	0.170072	0.243213	0.377798	-1.1347	2.5136	tal1;her12
									groove	0.150575	0.216395	0.245254	0.377798	-1.64493	3.11434	lmo2
									zona_limitans_intrathalamica	0.150575	0.216395	0.245254	0.377798	0.0149591	-0.028322	pax6a
									hypophysis	0.0687576	0.129936	0.250678	0.380777	-0.0820485	0.219658	six3b;her4.2;olig2;her4.3
									hypoblast	0.0865963	0.145336	0.249752	0.380777	0.0889945	-0.217725	ndr2;lmo2;her12
									iris	0.158694	0.224851	0.256991	0.387911	-2.20609	4.06093	pax6a
									tail_bud	0.092141	0.151465	0.262369	0.393554	0.776833	-1.85231	elavl3;lhx5;lhx1a
									optic_fissure	0.121597	0.183542	0.266343	0.397033	0.983382	-2.07203	lmo2;pax6a
									intermediate_hypothalamus	0.166736	0.232655	0.268549	0.397851	-1.65515	2.96495	pax6a
									neural_crest	0.0959175	0.1566	0.270831	0.398769	0.558263	-1.30872	six3b;pax6a;elavl3
									forebrain_midbrain_boundary_neural_tube	0.174701	0.238229	0.27993	0.404719	-2.69735	4.70601	six3b
									Purkinje_cell_layer_corpus_cerebelli	0.174701	0.238229	0.27993	0.404719	-0.808161	1.40998	olig2
									pars_intermedia	0.174701	0.238229	0.27993	0.404719	0.786213	-1.37169	pax6a
									somite_border	0.131164	0.195524	0.283707	0.407723	0.0444337	-0.0902584	her15.1;her12
									mesenchyme	0.107616	0.16992	0.296397	0.423425	0.314754	-0.701644	ndr2;lmo2;her12
									anterior_chamber_eye	0.190405	0.255292	0.302174	0.429122	-1.54327	2.55967	pax6a
									anterior_lateral_mesoderm	0.115709	0.178196	0.313546	0.440064	0.237027	-0.51119	ndr2;lmo2;her12
									structural_cell	0.147471	0.214504	0.312574	0.440064	0.4326	-0.828049	dscama;npas4a
									tongue	0.205812	0.2714	0.323742	0.451733	0.222562	-0.351825	ascl1a
									molecular_layer_corpus_cerebelli	0.220927	0.286049	0.344655	0.478134	-0.869592	1.31302	olig2
									infundibulum	0.136886	0.201551	0.356516	0.486158	0.0165973	-0.0330054	six3b;her4.2;her4.3
									forebrain	0.170932	0.23713	0.352585	0.486158	-0.759844	1.34226	rfx4;six3b
									nerve	0.228376	0.291544	0.354872	0.486158	0.0440431	-0.0650411	olig2
									epidermal_placode	0.235755	0.299372	0.364932	0.494823	-1.16345	1.68114	irx1b
									brainstem	0.181169	0.245652	0.369514	0.498221	-0.432582	0.738991	elavl3;her12
									myoblast	0.145705	0.213227	0.373656	0.500162	0.103465	-0.19929	nfixa;tal1;her12
									YSL	0.184602	0.248901	0.375121	0.500162	-0.541222	0.914425	ndr2;elavl3
									medial_floor_plate	0.250303	0.308811	0.384593	0.507156	-1.19957	1.6615	her12
									supportive_cell	0.250303	0.308811	0.384593	0.507156	0.522381	-0.72354	pax6a
									skeletal_element	0.156982	0.22426	0.394976	0.518001	0.76179	-1.41055	hbae3;her15.2;her15.1
									ciliated_cell	0.15927	0.224851	0.399221	0.520723	0.648449	-1.1913	irx3b;olig2;elavl3
									epithelium	0.201897	0.267709	0.402856	0.520846	-0.288254	0.461206	pax6a;elavl3
									optic_choroid	0.264576	0.320698	0.403656	0.520846	1.01295	-1.34685	pax6a
									primary_germ_layer	0.215864	0.282833	0.424642	0.544995	0.105335	-0.161491	tal1;lmo2
									endocrine_cell	0.22288	0.286049	0.435387	0.549963	-0.143303	0.215116	irx3b;adcyap1b
									ovarian_follicle	0.22288	0.286049	0.435387	0.549963	1.44781	-2.17334	adcyap1r1a;adcyap1b
									germ_ring	0.285479	0.344297	0.431167	0.549963	-1.39071	1.74338	pcdh1g30
									neurohypophysis	0.292315	0.350778	0.440058	0.552952	0.726415	-0.893434	pax6a
									Kupffer's_vesicle	0.194712	0.259616	0.461833	0.57134	0.371283	-0.607506	ablim1a;ndr2;her12
									epicardium	0.240493	0.303781	0.461788	0.57134	-0.0715089	0.101905	hbbe1.1;hbae3
									cloaca	0.305792	0.365124	0.457431	0.57134	-0.323523	0.383327	irx3b
									endocardium	0.244025	0.306628	0.466985	0.574751	-0.0185913	0.0262227	tal1;her12
									pericardial_cavity	0.247558	0.308811	0.472153	0.578147	1.90003	-2.65265	hbbe1.1;hbae3
									immature_gonad	0.32553	0.386768	0.482503	0.587821	-1.08587	1.21867	adcyap1b
									regenerating_tissue	0.216838	0.282833	0.498137	0.603802	1.0533	-1.61008	ascl1a;tal1;pax6a
									gut	0.344709	0.40517	0.506437	0.610778	-0.779373	0.830075	elavl3
									pharyngeal_arch	0.164946	0.231503	0.524795	0.629755	1.8209	-3.28151	hbae3;pcdh1g30;pax6a;pou3f3a;her12
									fertilized_egg	0.252196	0.308811	0.552176	0.631849	0.515713	-0.71042	urod;ndr2;lhx1a
									endodermal_cell	0.252196	0.308811	0.552176	0.631849	0.581424	-0.80094	ndr2;pcdh1g30;pax6a
									pigment_cell	0.254756	0.310362	0.555911	0.631849	2.39601	-3.27642	lingo1b;pax6a;crb2a
									sclerotome	0.36944	0.430416	0.536664	0.631849	0.194373	-0.19355	pax6a
									medulla_oblongata	0.375477	0.432421	0.543932	0.631849	-0.870695	0.852897	olig4
									anatomical_system	0.387377	0.432421	0.558133	0.631849	-0.351304	0.333161	dscama
									external_cellular_layer	0.387377	0.432421	0.558133	0.631849	-0.325578	0.308764	olig2
									duct	0.387377	0.432421	0.558133	0.631849	-0.253912	0.240799	sncb
									presumptive_diencephalon	0.381456	0.432421	0.551088	0.631849	0.213519	-0.205782	pax6a
									pronephric_glomerulus	0.387377	0.432421	0.558133	0.631849	0.409557	-0.388406	lhx1a
									vascular_sprouts	0.375477	0.432421	0.543932	0.631849	0.801376	-0.784995	arhgef9b
									posterior_kidney	0.381456	0.432421	0.551088	0.631849	1.02013	-0.983165	her12
									pharyngeal_pouch	0.393243	0.436937	0.56507	0.636699	1.78662	-1.6675	ndr2
									extraembryonic_cell	0.410506	0.454016	0.585246	0.656351	-0.516661	0.460016	ndr2
									thymus	0.416152	0.458149	0.591765	0.660575	1.24453	-1.09108	tal1
									ectodermal_cell	0.346083	0.40517	0.60419	0.662468	1.11747	-1.18572	six3b;pax6a
									olfactory_bulb	0.346083	0.40517	0.60419	0.662468	2.73571	-2.9028	pax6a;elavl3
									caudal_hematopoietic_tissue	0.427281	0.466125	0.604502	0.662468	-0.174799	0.148634	lmo2
									presumptive_hindbrain	0.427281	0.466125	0.604502	0.662468	0.368243	-0.313122	pax6a
									dorsal_axial_hypoblast	0.432766	0.469973	0.610723	0.666243	-0.34521	0.289133	ndr2
									utricle	0.448911	0.485309	0.628816	0.682877	1.16733	-0.934947	cahz
									saccule	0.45419	0.488815	0.634661	0.686121	0.586846	-0.463161	cahz
									atrioventricular_canal	0.459419	0.492235	0.640416	0.689237	-0.314197	0.24438	ndrg4
									islet	0.494653	0.52763	0.678282	0.726731	-0.353769	0.249018	pax6a
									otolith	0.518412	0.550526	0.702903	0.749763	2.36468	-1.55356	cahz
									olfactory_support_cell	0.376889	0.432421	0.709804	0.750453	2.01289	-1.96419	pax6a;crb2a;elavl3
									epithelial_cell	0.523028	0.552981	0.7076	0.750453	0.249444	-0.16167	irx3b
									neural_plate_border	0.53213	0.560137	0.716776	0.754501	0.987177	-0.622778	six3b
									neuromast_support_cell	0.549818	0.576229	0.734289	0.769561	1.63624	-0.978746	lingo1b
									hypochord	0.566841	0.588926	0.750737	0.779987	-0.37165	0.210977	her4.2
									somatic_cell	0.566841	0.588926	0.750737	0.779987	1.11543	-0.633202	atoh7
									lateral_line_primordium	0.617866	0.639172	0.797584	0.824865	-0.113566	0.0546802	lingo1b
									hatching_gland	0.621534	0.640206	0.800806	0.824865	-0.399392	0.189937	hbae3
									exocrine_cell	0.639354	0.655747	0.816176	0.837104	1.19728	-0.535541	pax6a
									paracrine_cell	0.666145	0.680318	0.838378	0.856216	2.78374	-1.13089	adcyap1b
									blastoderm	0.724775	0.737059	0.883002	0.897968	0.899178	-0.289441	ndr2
									motile_cell	0.735208	0.744515	0.890348	0.901618	0.603612	-0.185672	her12
									unfertilized_egg	0.783861	0.790448	0.922083	0.929832	2.10937	-0.513679	ndr2
									head_kidney	0.830315	0.833789	0.948264	0.952232	0.476412	-0.0885889	barhl2
									gill	0.851838	0.851838	0.95892	0.95892	0.49198	-0.0788931	cahz

## Sheet: Table S9
Supplmental Table 9: Anatomical enrichment analysis of Sox17E>Sox17N DARs at 28 hpf (left) and 48 hpf (right)
DARs were calculated using DiffBind version 3.0.15 (Stark and Brown, 2011) with the DESeq2 option (Love, Huber and Anders, 2014), on the broad peaks files (.broadPeak) produced by MACS2. R version 4.2.1 (R Core Team, 2021) was used for this processing.
Transcription start sites <=1kb from DARs were annotated using ChIPSeeker and anatomical enrichment analysed using FishEnrichr Anatomy GeneRIF Predicted Z-score
Term	Overlap	P-value	Adjusted P-value	Old P-value	Old Adjusted P-value	Z-score	Combined Score	Genes	-log10(adjPval)		Term	Overlap	P-value	Adjusted P-value	Old P-value	Old Adjusted P-value	Z-score	Combined Score	Genes	-log10(adjPval)
EVL	10/200	6.1638e-06	0.00111564	1.0872e-06	0.00019678	-1.48771	17.8478	esrp1;ano9b;tmprss4a;gna15.1;f11r.1;ovol1a;f2rl1.2;eps8l1b;cldn7b;tjp3	2.95248		pore	55/200	1.85917e-22	4.88961e-20	6.16902e-21	1.62245e-18	-1.49488	74.7991	esrp1;grhl1;lum;zgc:153284;anxa2a;col17a1b;plek2;tp63;ptpn3;ehd2b;cavin2a;icn;ahnak;si:dkey-262k9.2;si:ch211-241e1.3;dok1a;gdpd3a;cfl1l;pls3;crfb12;itga3a;zgc:162184;myof;cldni;capn2b;tmsb1;cx35.4;bnipl;cd2ap;scel;spint1a;pdlim2;perp;jupa;si:ch211-264f5.6;cdh26.1;pak6b;krt97;itgb4;zgc:101810;si:ch211-129c21.1;crybg1a;krt5;krt91;vsig8b;myo5b;itgb3a;dspa;fam83e;myofl;lgals3b;abi3b;gpa33a;epgn;pkp3a	19.3107
endocardial cushion	8/200	0.00025082	0.0151329	6.6504e-05	0.00401241	-2.08044	17.2485	ldb3a;synpo2lb;smtnl1;txlnba;palld;lmo7a;usp28;cdon	1.82008		epidermal placode	53/200	7.06022e-21	9.28419e-19	1.36275e-19	1.79202e-17	-2.2542	104.595	esrp1;grhl1;trpm4a;lum;zgc:153284;asph;tp63;znf185;cavin2a;icn;atp8b1;si:dkey-33i11.4;bicdl2;gdpd3a;cfl1l;pls3;spaca4l;cldnb;zgc:193505;cldni;capn2b;cldne;tmsb1;cx35.4;cd2ap;scel;aqp3a;perp;rnf183;krt17;zgc:110333;jupa;si:ch211-195b11.3;si:ch211-264f5.6;krt97;zgc:101810;krt5;elf3;krt91;vsig8b;si:ch73-347e22.8;sh3d21;tmprss13a;ppl;fam83e;lgals3b;abi3b;gpa33a;s100u;capn9;epgn;si:dkey-102c8.3;pkp3a	18.0323
skeletal element	8/200	0.00025082	0.0151329	6.6504e-05	0.00401241	-1.61306	13.3735	smad1;ldb3a;smtnl1;txlnba;palld;bcar1;usp28;cdon	1.82008		YSL	51/199	1.90543e-19	1.67043e-17	2.34781e-18	2.05824e-16	-1.19976	51.7148	etnppl;zgc:77938;selenop2;gcshb;lgals2b;f7;hal;sat1a.1;gata6;grhprb;apoa2;zgc:123103;lcn15;mat1a;pla2g12b;ftcd;hnf4a;zgc:172253;f9b;fetub;serpinf2b;cldnc;miox;apoa1b;ugt1ab;slc34a2b;cyp3a65;clic5b;vtnb;st3gal7;fbp1b;foxa3;mst1;mttp;mylk5;apoa4b.1;cyp2y3;krt92;apom;g6pca.1;g6pca.2;sb:cb1058;hao2;pck2;cetp;ttr;pklr;ucp1;gpx4a;kng1;a1cf	16.7772
atrial myocardium	7/200	0.00133589	0.0483592	0.00043193	0.0156358	-2.38846	15.8072	ldb3a;synpo2lb;smtnl1;txlnba;palld;lmo7a;usp28	1.31552		liver primordium	50/200	1.3565e-18	8.91901e-17	1.2459e-17	8.1918e-16	-1.49681	61.5811	etnppl;selenop2;gcshb;adamts13;si:ch73-281k2.5;f7;hal;gata6;grhprb;apoa2;zgc:123103;lcn15;mat1a;pla2g12b;ftcd;hnf4a;zgc:172253;f9b;fetub;serpinf2b;miox;apoa1b;ugt1ab;nr1h4;clic5b;hkdc1;rbp2b;vtnb;slc16a1b;fbp1b;foxa3;mst1;mttp;apoa4b.1;cyp2y3;apom;g6pca.1;g6pca.2;sb:cb1058;cdab;hao2;calml4a;pck2;cetp;ttr;pklr;acsbg1;gpx4a;kng1;a1cf	16.0497
islet	7/200	0.00133589	0.0483592	0.00043193	0.0156358	-1.58802	10.5098	slc7a2;smad1;krt4;net1;bcar1;cdon;rpl18	1.31552		yolk	47/200	2.04167e-16	1.07392e-14	9.69907e-16	5.10171e-14	-1.49904	54.1569	etnppl;clic5b;rbp2b;selenop2;vtnb;fgg;cbln10;gcshb;adamts13;si:ch73-281k2.5;fbp1b;agt;mst1;f7;hal;ambp;apoa4b.1;grhprb;apoa2;zgc:123103;lcn15;mat1a;pla2g12b;cyp2y3;ftcd;hnf4a;apom;g6pca.1;g6pca.2;sb:cb1058;zgc:172253;hao2;pck2;f9b;fetub;cetp;serpinf2b;pklr;acsbg1;miox;apoa1b;ugt1ab;ucp1;nr1h4;gpx4a;kng1;a1cf	13.969
adaxial cell	6/200	0.00620336	0.0660476	0.00243657	0.0259423	-2.52644	12.841	smad1;krt4;net1;six4a;tnnt3a;cdon	1.18014		corpuscles of Stannius	44/200	2.38434e-14	1.04513e-12	6.36365e-14	2.7894e-12	-1.91849	60.1779	etnppl;clic5b;rbp2b;vtnb;tmprss2;kynu;fgg;cbln10;dpys;st3gal7;edn1;adamts13;si:ch73-281k2.5;agt;f7;hal;grhprb;lcn15;ftcd;si:ch211-248a14.8;apom;serpind1;g6pca.2;hnf1ba;si:ch211-214j24.14;igfals;sult1st4;sb:cb1058;cdab;f9b;f9a;cetp;acy3.2;cldn15lb;angptl3;serpinf2b;acsbg1;rnasel3;gal3st1b;nr1h5;ppp1r1b;nr1h4;areg;kng1	11.9808
atrioventricular canal	6/200	0.00620336	0.0660476	0.00243657	0.0259423	-2.2082	11.2235	ldb3a;synpo2lb;smtnl1;palld;lmo7a;usp28	1.18014		exocrine pancreas	43/200	1.09953e-13	3.21308e-12	2.46608e-13	7.20645e-12	-2.10871	62.9212	etnppl;clic5b;selenop2;vtnb;fgg;cbln10;st3gal7;gcshb;adamts13;fbp1b;mst1;f7;hal;grhprb;apoa2;lcn15;mat1a;pla2g12b;cyp2y3;ftcd;hnf4a;apom;g6pca.1;slc7a2;g6pca.2;sb:cb1058;zgc:172253;hao2;pck2;f9b;fetub;cetp;serpinf2b;cldnc;acsbg1;miox;apoa1b;ugt1ab;ucp1;nr1h4;gpx4a;kng1;a1cf	11.4931
cardiac mesenchymal cell	6/200	0.00620336	0.0660476	0.00243657	0.0259423	-2.0792	10.5679	si:dkey-79d12.5;ldb3a;synpo2lb;palld;lmo7a;usp28	1.18014		exocrine cell	43/200	1.09953e-13	3.21308e-12	2.46608e-13	7.20645e-12	-2.09894	62.6296	etnppl;clic5b;selenop2;vtnb;fgg;cbln10;st3gal7;gcshb;adamts13;fbp1b;mst1;f7;hal;grhprb;apoa2;lcn15;mat1a;pla2g12b;cyp2y3;ftcd;hnf4a;apom;g6pca.1;slc7a2;g6pca.2;sb:cb1058;zgc:172253;hao2;pck2;f9b;fetub;cetp;serpinf2b;cldnc;acsbg1;miox;apoa1b;ugt1ab;ucp1;nr1h4;gpx4a;kng1;a1cf	11.4931
epicardium	6/200	0.00620336	0.0660476	0.00243657	0.0259423	-1.93183	9.81882	ldb3a;synpo2lb;txlnba;palld;lmo7a;usp28	1.18014		intestinal bulb	43/200	1.09953e-13	3.21308e-12	2.46608e-13	7.20645e-12	-1.53387	45.7686	ipmka;etnppl;clic5b;rbp2b;selenop2;vtnb;st3gal7;si:ch211-243g18.2;gcshb;tm4sf4;adamts13;fbp1b;mst1;lgals2b;hal;sat1a.1;apoa4b.1;grhprb;rbp2a;mat1a;tmc5;pla2g12b;cyp2y3;apom;slc7a2;g6pca.2;serpinb1;sb:cb1058;zgc:172253;hao2;calml4a;pck2;cetp;ttr;spink4;apoa1b;ugt1ab;ucp1;nr1h4;ahr1a;gpx4a;kng1;a1cf	11.4931
ventricular epicardium	6/200	0.00620336	0.0660476	0.00243657	0.0259423	-1.83585	9.331	ldb3a;synpo2lb;txlnba;palld;lmo7a;usp28	1.18014		EVL	42/200	4.92144e-13	1.29434e-11	9.36051e-13	2.46181e-11	-1.38157	39.1537	esrp1;oclna;grhl3;cdh1;spint1b;gna15.1;lpcat4;oclnb;zgc:174164;ovol1a;zgc:110333;ftr83;eps8l1b;tjp3;rabgap1l2;znf185;plcd1b;farp2;atp8b1;st14a;elovl1a;btr12;dhrs13a.2;elovl7b;ano9b;tmprss4a;ppp1r9alb;svopl;si:zfos-905g2.1;waslb;f2rl1.2;si:ch73-347e22.8;spaca4l;zgc:193505;marveld2b;cldn7b;si:ch73-204p21.2;myo1eb;ctnnd1;zgc:162964;ctsla;zgc:63569	10.888
gill filament	6/200	0.00620336	0.0660476	0.00243657	0.0259423	-1.7345	8.81587	rassf7b;net1;f2rl1.2;elf3;si:dkey-262k9.2;ptgs2a	1.18014		gill filament	40/200	8.99859e-12	2.15148e-10	1.26471e-11	3.02381e-10	-1.72147	43.7837	grhl1;spint1a;trpm4a;myzap;tmprss2;perp;rnf183;rassf6;zgc:110333;jupa;si:ch211-195b11.3;rassf7b;icn;elf3;si:dkey-262k9.2;si:dkey-33i11.9;klf3;si:dkey-33i11.4;bicdl2;vsig8b;gdpd3a;pls3;f2rl1.2;foxi3a;sh3d21;tmprss13a;foxi3b;itga3a;ptgs2a;tagln2;gpa33a;cldni;itgb1b.1;gal3st1b;cldne;btr02;tmsb1;s100u;epgn;cx35.4	9.66726
lateral line	6/200	0.00620336	0.0660476	0.00243657	0.0259423	-1.54533	7.85438	btc;smad1;net1;six4a;bcar1;cdon	1.18014		hematopoietic cell	38/200	1.4517e-10	3.18165e-09	1.563e-10	3.42557e-09	-2.02829	45.947	esrp1;prdx5;prkcda;bnipl;cd2ap;grhl1;pdlim2;myzap;perp;col17a1b;plek2;pfn1;capgb;si:ch211-264f5.6;cdh26.1;itgb4;ahnak;tiam1a;crybg1a;hhla2a.1;krt91;slc6a7;adam28;fybb;vsig8b;si:ch211-241e1.3;dok1a;gdpd3a;cfl1l;si:ch211-85n16.4;tagln2;dspa;zgc:162184;myof;myofl;tmsb1;pkp3a;cx35.4	8.49735
pharyngeal pouch	6/200	0.00620336	0.0660476	0.00243657	0.0259423	-1.4905	7.5757	nkx2.7;krt4;net1;six4a;bcar1;cdon	1.18014		acid secreting cell	36/200	2.05728e-09	4.16204e-08	1.75872e-09	3.55803e-08	-1.87362	37.4758	cyp3a65;etnppl;clic5b;fabp2;tmprss2;eps8l3b;eps8l3a;st3gal7;gcshb;tm4sf4;fbp1b;enpep;lgals2b;sat1a.1;apoa4b.1;rbp2a;pla2g12b;si:ch211-137i24.10;si:ch211-248a14.8;g6pca.2;serpinb1;sb:cb1058;itga3a;zgc:77748;lad1;erbb3b;cldn15la;cldnc;ugt1ab;tmem86b;ucp1;ahr1a;slc13a2;atp1a1a.4;a1cf;unc93a	7.38069
pericardial cavity	6/200	0.00620336	0.0660476	0.00243657	0.0259423	-1.4073	7.15284	ldb3a;synpo2lb;txlnba;palld;lmo7a;usp28	1.18014		lateral migration pathway mesenchyme	35/200	7.36619e-09	1.38379e-07	5.68673e-09	1.06829e-07	-1.45375	27.2234	esrp1;cd2ap;rbp4;mylz3;aqp3a;lum;perp;jupa;tp63;ptpn3;ehd2b;krt97;cavin2a;cavin4a;icn;zgc:101810;krt5;krt91;synpo2b;gdpd3a;pls3;itgb3a;itga3a;fam83e;lgals3b;abi3b;myoc;gpa33a;cldni;itgb1b.1;capn2b;epgn;slc16a9a;pkp3a;cx35.4	6.85893
presumptive diencephalon	6/200	0.00620336	0.0660476	0.00243657	0.0259423	-1.37462	6.98671	smad1;krt4;net1;six4a;tnnt3a;cdon	1.18014		intestinal lamina propria mucosa	32/200	2.74537e-07	4.24724e-06	1.64597e-07	2.54642e-06	-1.59902	24.1583	cyp3a65;etnppl;zgc:77938;clic5b;fabp2;eps8l3b;eps8l3a;gcshb;tm4sf4;fbp1b;enpep;lgals2b;zgc:136472;sat1a.1;apoa4b.1;rbp2a;pla2g12b;cyp2y3;sgpl1;serpinb1;sb:cb1058;zgc:77748;lad1;cldn15la;apoa1a;cldnc;ugt1ab;tmem86b;slc34a2b;ucp1;slc13a2;a1cf	5.37189
otic vesicle	6/200	0.00620336	0.0660476	0.00243657	0.0259423	-1.3268	6.74367	smad1;krt4;net1;six4a;bcar1;cdon	1.18014		intestinal mucosa	32/200	2.74537e-07	4.24724e-06	1.64597e-07	2.54642e-06	-1.59851	24.1506	cyp3a65;etnppl;zgc:77938;clic5b;fabp2;eps8l3b;eps8l3a;gcshb;tm4sf4;fbp1b;enpep;lgals2b;zgc:136472;sat1a.1;apoa4b.1;rbp2a;pla2g12b;cyp2y3;sgpl1;serpinb1;sb:cb1058;zgc:77748;lad1;cldn15la;apoa1a;cldnc;ugt1ab;tmem86b;slc34a2b;ucp1;slc13a2;a1cf	5.37189
myoblast	6/200	0.00620336	0.0660476	0.00243657	0.0259423	-1.20826	6.14117	smad1;ldb3a;six4a;txlnba;palld;usp28	1.18014		renal glomerulus	32/200	2.74537e-07	4.24724e-06	1.64597e-07	2.54642e-06	-1.52851	23.093	esrp1;cd2ap;lmna;perp;anxa2a;lims1;jupa;tp63;si:ch211-264f5.6;ehd2b;farp2;arhgef18a;icn;ahnak;crybg1a;pleca;rrbp1a;gdpd3a;pls3;nav2b;itga3b;ppl;si:ch211-85n16.4;myof;myofl;fgfr1a;capn2b;myo1eb;pawr;s100u;capn9;phactr4a	5.37189
epidermal placode	5/200	0.0247049	0.165615	0.0117372	0.0786827	-1.98227	7.33588	esrp1;lgals3b;net1;cldnb;elf3	0.780901		acinar cell	31/200	8.53443e-07	1.12228e-05	4.78665e-07	6.29444e-06	-1.89355	26.4605	cyp3a65;etnppl;clic5b;trpm4a;eps8l3a;st3gal7;gcshb;fbp1b;ptpn3;ehd2b;sat1a.1;apoa4b.1;crybg1a;mat1a;pla2g12b;cyp2y3;slc7a2;rrbp1a;sgpl1;pls3;col18a1a;sb:cb1058;itga3a;rpl18;erbb3b;itgb1b.1;cldnc;erbb3a;ugt1ab;ucp1;a1cf	4.9499
anterior chamber eye	5/200	0.0247049	0.165615	0.0117372	0.0786827	-1.92615	7.1282	smad1;ldb3a;synpo2lb;palld;usp28	0.780901		duct	31/200	8.53443e-07	1.12228e-05	4.78665e-07	6.29444e-06	-1.65215	23.0871	cd2ap;macf1a;lum;perp;dysf;col17a1b;lims1;jupa;tp63;cdh26.1;itgb4;smad1;cavin2a;sema3ga;ahnak;crybg1a;krt5;krt91;dok1a;gdpd3a;pls3;itga2.2;col18a1a;itgb3a;dspa;fam83e;myo1cb;myofl;capn2b;pkp3a;cx35.4	4.9499
cardiac jelly	5/200	0.0247049	0.165615	0.0117372	0.0786827	-1.91872	7.10072	ldb3a;synpo2lb;palld;lmo7a;usp28	0.780901		supportive cell	31/200	8.53443e-07	1.12228e-05	4.78665e-07	6.29444e-06	-1.48672	20.7754	esrp1;cd2ap;pdlim2;lum;slc16a1b;perp;ddx21;capns1a;mcm6;jupa;tp63;si:ch211-264f5.6;foxa3;znf185;farp2;krt97;gata6;gdpd3a;cfl1l;pls3;spaca4l;zgc:193505;rpl18;rps27.2;lgals3b;cldni;fgfr1a;capn2b;myo1eb;capn9;pkp3a	4.9499
hatching gland cell	5/200	0.0247049	0.165615	0.0117372	0.0786827	-1.72092	6.3687	esrp1;ano9b;gna15.1;ovol1a;eps8l1b	0.780901		dental organ	29/200	7.36954e-06	9.22947e-05	3.71286e-06	4.64991e-05	-1.96853	23.2644	esrp1;grhl1;etv4;slc16a1b;perp;zgc:153665;col17a1b;ftr83;tp63;si:ch211-264f5.6;cdh26.1;znf185;krt97;itgb4;krt5;krt91;ano9b;dok1a;gdpd3a;spaca4l;tmem79b;zgc:193505;dspa;fam83e;myo1eb;sema4bb;capn9;pkp3a;cx35.4	4.03482
ventricular myocardium	5/200	0.0247049	0.165615	0.0117372	0.0786827	-1.7005	6.29312	ldb3a;synpo2lb;palld;lmo7a;usp28	0.780901		notochord posterior region	28/200	2.04353e-05	0.000244294	9.88509e-06	0.000118172	-1.28585	13.8849	ecrg4b;mylz3;tnnt2c;col28a2a;aep1;zgc:171775;im:7150988;col4a6;cavin4a;krt4;and1;col7a1;bhlha9;cyt1;synpo2b;krtt1c19e;si:cabz01007794.1;col18a1a;padi2;itga3b;frem3;zgc:85932;cyt1l;si:ch73-74h11.1;lamb4;tmem182a;klhl31;si:dkey-102c8.3	3.61209
serous membrane	5/200	0.0247049	0.165615	0.0117372	0.0786827	-1.5343	5.67806	ldb3a;synpo2lb;palld;lmo7a;usp28	0.780901		barrier epithelial cell	27/200	5.4449e-05	0.00059667	2.55059e-05	0.000279502	-1.67725	16.4677	esrp1;macf1a;myzap;lmna;perp;anxa2a;jupa;ehd2b;sema3ga;ahnak;crybg1a;pleca;ackr4b;jag1b;pls3;nav2b;slc2a1b;si:ch211-85n16.4;dspa;myo1cb;myofl;arhgap29a;pawr;limch1b;lmo7a;phactr4a;cx35.4	3.22427
regenerating tissue	5/200	0.0247049	0.165615	0.0117372	0.0786827	-1.51763	5.61639	smad1;krt4;net1;six4a;cdon	0.780901		posterior intestine	27/200	5.4449e-05	0.00059667	2.55059e-05	0.000279502	-1.31775	12.938	cyp3a65;etnppl;zgc:77938;clic5b;fabp2;eps8l3b;eps8l3a;st3gal7;gcshb;tm4sf4;fbp1b;enpep;lgals2b;sat1a.1;apoa4b.1;cyp2y3;g6pca.2;serpinb1;sb:cb1058;zgc:77748;cldn15la;cldnc;ugt1ab;tmem86b;ucp1;slc13a2;a1cf	3.22427
presumptive midbrain	5/200	0.0247049	0.165615	0.0117372	0.0786827	-1.40557	5.20168	krt4;net1;six4a;tnnt3a;cdon	0.780901		renal vesicle	26/200	0.000139265	0.00140872	6.37135e-05	0.000644487	-1.66368	14.772	tnnt2c;col28a2a;asph;aep1;cdh27;zgc:171775;im:7150988;col4a6;krt4;and1;col7a1;bhlha9;si:cabz01007794.1;pls3;col18a1a;padi2;itga3b;frem3;cyt1l;si:ch73-74h11.1;fgfr1a;itgb1b.1;lamb4;capn8;myh9a;si:dkey-102c8.3	2.85117
optic fissure	5/200	0.0247049	0.165615	0.0117372	0.0786827	-1.27811	4.72998	krt4;net1;six4a;bcar1;cdon	0.780901		pancreatic bud	26/200	0.000139265	0.00140872	6.37135e-05	0.000644487	-1.24395	11.0452	etnppl;clic5b;si:ch211-243g18.2;gcshb;fbp1b;pcsk5a;grhprb;apoa2;mat1a;cyp2k16;pla2g12b;cyp2y3;sept9a;apom;rrbp1a;si:ch211-214j24.14;pls3;col18a1a;calml4a;pck2;fetub;itgb1b.1;serpinf2b;apoa1b;gpx4a;s100u	2.85117
pore	5/200	0.0247049	0.165615	0.0117372	0.0786827	-1.25619	4.64884	esrp1;cdh26.1;lgals3b;si:ch211-129c21.1;si:dkey-262k9.2	0.780901		cerebellar crest	24/200	0.000802551	0.00753824	0.000359127	0.00337323	-1.7655	12.584	mylz3;krtt1c19e;col28a2a;si:cabz01007794.1;asph;pls3;aep1;col18a1a;krt17;padi2;itga3b;ppl;frem3;cdh27;cyt1l;si:ch73-74h11.1;col4a6;itgb1b.1;lamb4;krt4;tmem182a;klhl31;capn8;cyt1	2.12273
auditory epithelial support cell	4/200	0.0826433	0.287662	0.0472302	0.164398	-1.75338	4.37157	esrp1;net1;f11r.1;six4a	0.541117		hatching gland cell	24/200	0.000802551	0.00753824	0.000359127	0.00337323	-1.6298	11.6168	esrp1;ano9b;grhl1;grhl3;gna15.1;slc16a1b;ovol1a;si:ch73-347e22.8;spaca4l;zgc:153665;zgc:193505;ftr83;eps8l1b;fam83e;rabgap1l2;foxa3;znf185;krt97;cldne;lca5;elovl1a;zgc:162964;sema4bb;capn9	2.12273
acinar cell	4/200	0.0826433	0.287662	0.0472302	0.164398	-1.73206	4.31842	slc7a2;net1;sb:cb1058;rpl18	0.541117		basal lamina	23/200	0.00180423	0.0163625	0.000808395	0.00733131	-1.80934	11.4307	col28a2a;si:cabz01007794.1;asph;pls3;col18a1a;itga3b;ppl;frem3;cdh27;si:ch211-264f5.6;cyt1l;si:ch73-74h11.1;fgfr1a;col4a6;itgb1b.1;lamb4;krt4;zgc:101810;and1;crybg1a;pleca;capn9;si:dkey-102c8.3	1.78615
hematopoietic cell	4/200	0.0826433	0.287662	0.0472302	0.164398	-1.72228	4.29403	esrp1;cdh26.1;adam28;pfn1	0.541117		auditory epithelial support cell	22/200	0.00387657	0.0318606	0.0017532	0.0144091	-1.75338	9.73619	esrp1;ponzr5;si:zfos-905g2.1;bmpr1aa;zgc:174164;slc16a1b;gdpd3a;perp;spaca4l;si:ch211-243g18.2;jupa;tp63;si:ch211-264f5.6;pcsk5a;znf185;farp2;krt97;fgfr1a;fgf10a;myo1eb;capn9;tjp2a	1.49675
cloaca	4/200	0.0826433	0.287662	0.0472302	0.164398	-1.6088	4.01109	net1;six4a;ptgs2a;prdm1a	0.541117		notochord	22/200	0.00387657	0.0318606	0.0017532	0.0144091	-1.24995	6.94073	cd2ap;rrbp1a;bmpr1aa;cmn;asph;pls3;col18a1a;itga3b;lims1;jupa;ppl;tp63;si:ch211-264f5.6;ehd2b;farp2;smad1;fgfr1a;col4a6;itgb1b.1;crybg1a;pleca;capn9	1.49675
barrier epithelial cell	4/200	0.0826433	0.287662	0.0472302	0.164398	-1.56648	3.90558	esrp1;net1;palld;lmo7a	0.541117		pancreas primordium	22/200	0.00387657	0.0318606	0.0017532	0.0144091	-1.04698	5.81366	hnf4a;etnppl;zgc:77938;hkdc1;ryk;slc16a1b;spaca4l;pck2;fbp1b;foxa3;mttp;nop56;ttr;gata6;apoa4b.1;slc34a2b;rbp2a;sema4bb;pla2g12b;cyp2y3;krt92;a1cf	1.49675
hypochord	4/200	0.0826433	0.287662	0.0472302	0.164398	-1.53261	3.82113	krt4;net1;tnnt3a;cdon	0.541117		taste bud	21/200	0.00795092	0.0633664	0.00365824	0.029155	-1.38446	6.69315	ano9b;cdh1;bmpr1aa;gna15.1;slc16a1b;scamp2l;arrdc1a;calml4a;foxa3;mttp;pcsk5a;plcd1b;farp2;fgf10a;st14a;myo1eb;ctnnd1;sema4bb;tjp2a;ctsla;zgc:63569	1.19814
head kidney	4/200	0.0826433	0.287662	0.0472302	0.164398	-1.41352	3.52422	lgals3b;si:dkey-79d12.5;net1;cdon	0.541117		gill	20/200	0.0155478	0.116831	0.00733366	0.0551072	-1.58319	6.59214	cd9b;trpm4a;oclnb;epcam;foxi3a;zgc:92313;sh3d21;tmprss13a;foxi3b;tlcd1;si:ch211-195b11.3;tmem51a;atp8b1;gal3st1b;cldne;spint2;btr02;elovl1b;elf3;si:dkey-33i11.4	0.932444
hindbrain neural keel	4/200	0.0826433	0.287662	0.0472302	0.164398	-1.38029	3.44136	nkx2.7;si:dkey-157g16.6;six4a;cdon	0.541117		hypochord	20/200	0.0155478	0.116831	0.00733366	0.0551072	-1.57036	6.53872	rrbp1a;col28a2a;si:cabz01007794.1;asph;pls3;col18a1a;padi2;itga3b;frem3;cdh27;cyt1l;si:ch73-74h11.1;fgfr1a;col4a6;itgb1b.1;lamb4;krt4;and1;klhl31;capn9	0.932444
hindbrain neural tube	4/200	0.0826433	0.287662	0.0472302	0.164398	-1.30965	3.26523	si:dkey-157g16.6;krt4;tnnt3a;cdon	0.541117		female organism	19/200	0.0289514	0.200374	0.0141035	0.0976109	-1.41745	5.02081	lnx2b;si:ch73-234b20.5;tmprss2;lmna;zgc:174164;eps8l3b;anxa2a;zgc:92313;itga3a;tagln2;myof;tmem51a;myo1cb;ehd2b;cldnc;flii;si:ch211-129c21.1;si:ch211-137i24.10;sept9a	0.698158
forebrain ventricle	4/200	0.0826433	0.287662	0.0472302	0.164398	-1.25123	3.11958	si:dkey-157g16.6;krt4;tnnt3a;cdon	0.541117		lamina densa	19/200	0.0289514	0.200374	0.0141035	0.0976109	-1.38869	4.91894	macf1a;col28a2a;asph;pls3;col18a1a;itga3b;ppl;frem3;cdh27;si:ch211-264f5.6;myo1cb;fgfr1a;col4a6;itgb1b.1;lamb4;krt4;crybg1a;klhl31;pleca	0.698158
lens capsule	4/200	0.0826433	0.287662	0.0472302	0.164398	-1.20774	3.01115	smad1;ldb3a;palld;usp28	0.541117		odontoblast	19/200	0.0289514	0.200374	0.0141035	0.0976109	-1.02155	3.61848	esrp1;bmpr1aa;cmn;perp;asph;pls3;col18a1a;spaca4l;si:ch211-243g18.2;itga3b;ppl;tp63;si:ch211-264f5.6;znf185;ehd2b;farp2;krt97;fgfr1a;capn9	0.698158
lateral migration pathway mesenchyme	4/200	0.0826433	0.287662	0.0472302	0.164398	-1.16197	2.89705	esrp1;lgals3b;myoc;net1	0.541117		compound organ	18/200	0.051274	0.321073	0.0259785	0.162675	-1.55412	4.61664	etv4;clic5b;si:zfos-905g2.1;tmem254;slc16a1b;scamp2l;si:ch211-243g18.2;stap2b;calml4a;pfkfb1;pcsk5a;nop56;farp2;myo1eb;ctnnd1;slc34a2b;ctsla;zgc:63569	0.493397
molecular layer corpus cerebelli	4/200	0.0826433	0.287662	0.0472302	0.164398	-1.1062	2.75801	myot;ldb3a;synpo2lb;usp28	0.541117		blastodisc	18/200	0.051274	0.321073	0.0259785	0.162675	-1.45401	4.31924	elovl6l;cenpe;lnx2b;si:ch211-137a8.2;lpcat4;epcam;hyou1;zgc:92313;macc1;myof;tmem51a;osbpl7;ptpn3;galnt6;arhgef18a;flii;zgc:101744;si:ch211-129c21.1	0.493397
primitive heart tube	4/200	0.0826433	0.287662	0.0472302	0.164398	-1.09256	2.724	ldb3a;synpo2lb;palld;usp28	0.541117		pharyngeal pouch	18/200	0.051274	0.321073	0.0259785	0.162675	-1.16039	3.44702	col28a2a;trpm4a;si:cabz01007794.1;asph;pls3;col18a1a;krt17;itga3b;frem3;gas1a;cyt1l;col4a6;itgb1b.1;lamb4;krt4;and1;capn8;capn9	0.493397
presumptive midbrain hindbrain boundary	4/200	0.0826433	0.287662	0.0472302	0.164398	-1.08451	2.70393	krt4;net1;six4a;cdon	0.541117		pectoral fin fold	18/200	0.051274	0.321073	0.0259785	0.162675	-0.94207	2.79849	rrbp1a;lum;pls3;col18a1a;padi2;itga3b;frem3;im:7150988;si:ch73-74h11.1;col4a6;itgb1b.1;fgf10a;and2;and1;pleca;s100u;bhlha9;si:dkey-102c8.3	0.493397
optic cup	4/200	0.0826433	0.287662	0.0472302	0.164398	-1.06022	2.64337	krt4;six4a;bcar1;cdon	0.541117		digestive enzyme secreting cell	17/200	0.0862693	0.493235	0.0457615	0.261637	-1.61598	3.95962	cmn;si:cabz01007794.1;asph;pls3;col18a1a;itga3b;frem3;ehd2b;cyt1l;col4a6;itgb1b.1;lamb4;krt4;col9a2;klhl31;pleca;pla2g12b	0.306946
supportive cell	4/200	0.0826433	0.287662	0.0472302	0.164398	-1.0442	2.60343	esrp1;lgals3b;net1;rpl18	0.541117		islet	17/200	0.0862693	0.493235	0.0457615	0.261637	-1.1338	2.77813	slc7a2;trpm4a;cmn;pls3;col18a1a;rpl18;rps27.2;cct2;ehd2b;smad1;col4a6;itgb1b.1;krt4;cebpd;col9a2;pla2g12b;bhlha15	0.306946
presumptive hindbrain	4/200	0.0826433	0.287662	0.0472302	0.164398	-1.04279	2.59991	krt4;net1;six4a;cdon	0.541117		male organism	17/200	0.0862693	0.493235	0.0457615	0.261637	-1.11997	2.74425	clic5b;lnx2b;epcam;qsox1;eps8l3b;st3gal7;zgc:92313;arrdc1a;tmem51a;spink4;cldnc;flii;zgc:101744;nr1h4;si:ch211-137i24.10;sept9a;a1cf	0.306946
osteoblast	4/200	0.0826433	0.287662	0.0472302	0.164398	-1.04252	2.59923	smad1;net1;six4a;cdon	0.541117		nephron progenitor	17/200	0.0862693	0.493235	0.0457615	0.261637	-1.00713	2.46774	elovl6l;nectin4b;si:zfos-905g2.1;si:ch211-137a8.2;lpcat4;zgc:174164;hyou1;si:ch211-266i6.3;si:ch211-126c2.4;macc1;myof;farp2;fgfr1a;myo1eb;ctnnd1;ctsla;zgc:63569	0.306946
myoseptum	4/200	0.0826433	0.287662	0.0472302	0.164398	-1.01356	2.52703	smad1;net1;six4a;cdon	0.541117		chondroblast	16/200	0.137756	0.724595	0.0769657	0.40484	-1.41969	2.81421	rrbp1a;bmpr1aa;asph;pls3;col18a1a;spaca4l;mcm6;ppl;tp63;gas1a;znf185;farp2;fgfr1a;col4a6;col9a2;capn9	0.139905
midbrain hindbrain boundary	4/200	0.0826433	0.287662	0.0472302	0.164398	-0.995462	2.48191	nkx2.7;krt4;six4a;cdon	0.541117		thyroid primordium	16/200	0.137756	0.724595	0.0769657	0.40484	-1.40717	2.78939	trpm4a;rnf183;asph;si:rp71-77l1.1;si:ch73-347e22.8;foxi3a;col18a1a;tmprss13a;foxi3b;itga3b;mcm6;si:ch211-195b11.3;nt5c2b;s100u;si:dkey-33i11.4;capn9	0.139905
reticular formation	4/199	0.0814846	0.287662	0.0465298	0.164398	-0.989664	2.48143	krt4;bcar1;sgcg;cdon	0.541117		cloaca	16/200	0.137756	0.724595	0.0769657	0.40484	-1.3781	2.73178	rrbp1a;bmpr1aa;asph;pls3;spaca4l;mcm6;lims1;ptgs2a;znf185;farp2;arhgap29a;fgfr1a;ankrd45;s100u;capn9;sept9a	0.139905
pancreatic bud	4/200	0.0826433	0.287662	0.0472302	0.164398	-0.992347	2.47414	net1;six4a;bcar1;cdon	0.541117		pericardial cavity	16/200	0.137756	0.724595	0.0769657	0.40484	-1.00912	2.00034	acsl1b;myzap;rbfox1l;pls3;map3k15;slc2a1b;anxa2a;itga3b;myo1cb;vegfab;cox7a1;ldb3b;hhla2a.1;ackr4b;lmo7a;phactr4a	0.139905
olfactory support cell	4/200	0.0826433	0.287662	0.0472302	0.164398	-0.945159	2.35649	fgfrl1b;bcar1;cdon;zgc:171775	0.541117		adaxial cell	15/200	0.208598	0.99748	0.123407	0.59011	-1.75356	2.74844	bmpr1aa;asph;rbfox1l;pls3;col18a1a;itga3b;mcm6;lims1;frem3;gas1a;farp2;smad1;col4a6;krt4;klhl31	0.00109587
pharyngeal arch	4/200	0.0826433	0.287662	0.0472302	0.164398	-0.926436	2.30981	smad1;net1;six4a;cdon	0.541117		whole organism	15/200	0.208598	0.99748	0.123407	0.59011	-1.11775	1.7519	oclna;cd9b;syngr2b;sst1.2;pla1a;prtfdc1;tuft1a;tlcd1;si:ch73-61d6.3;tmem51a;plcd1b;itgb5;spink4;zgc:101744;elovl1b	0.00109587
absorptive cell	3/200	0.226151	0.449817	0.154222	0.30675	-1.61781	2.40496	krt4;tnnt3a;cdon	0.346964		pronephric glomerulus	15/200	0.208598	0.99748	0.123407	0.59011	-1.0998	1.72376	rrbp1a;arl5c;tmprss2;slc16a1b;fam3c;prtfdc1;lsr;nop56;farp2;myo1eb;ctnnd1;si:rp71-1g18.13;ctsla;slc16a9a;zgc:63569	0.00109587
central canal	3/200	0.226151	0.449817	0.154222	0.30675	-1.4272	2.12161	synpo2lb;palld;usp28	0.346964		otic vesicle	15/200	0.208598	0.99748	0.123407	0.59011	-0.875545	1.37228	col28a2a;asph;pls3;col18a1a;si:ch211-243g18.2;itga3b;lims1;gas1a;smad1;col4a6;fgf10a;krt4;and1;crybg1a;capn9	0.00109587
basal lamina	3/200	0.226151	0.449817	0.154222	0.30675	-1.41161	2.09844	krt4;bcar1;cdon	0.346964		neuron neural crest derived	15/200	0.208598	0.99748	0.123407	0.59011	-0.823906	1.29134	esrp1;etv4;bmpr1aa;asph;c2cd2;mcm6;ppl;znf185;nop56;farp2;fgfr1a;myo1eb;ctnnd1;capn9;tjp2a	0.00109587
dental organ	3/200	0.226151	0.449817	0.154222	0.30675	-1.38901	2.06484	esrp1;cdh26.1;ano9b	0.346964		germ ring	14/200	0.299409	0.999995	0.188372	0.812161	-1.16816	1.40873	elovl6l;nectin4b;si:zfos-905g2.1;si:ch211-137a8.2;lpcat4;zgc:174164;foxa3;macc1;myof;farp2;myo1eb;ctnnd1;ctsla;zgc:63569	1.99798e-06
forebrain neural tube	3/200	0.226151	0.449817	0.154222	0.30675	-1.38275	2.05553	nkx2.7;six4a;cdon	0.346964		tail bud	14/200	0.299409	0.999995	0.188372	0.812161	-1.14763	1.38398	ponzr5;etv4;asph;si:ch73-347e22.8;spaca4l;foxi3b;mcm6;fgfr1a;and2;cldne;and1;s100u;si:dkey-33i11.4;capn9	1.99798e-06
digestive enzyme secreting cell	3/200	0.226151	0.449817	0.154222	0.30675	-1.36694	2.03203	krt4;net1;cdon	0.346964		hatching gland	14/200	0.299409	0.999995	0.188372	0.812161	-1.13787	1.37221	esrp1;grhl1;grhl3;gna15.1;spaca4l;zgc:153665;ftr83;eps8l1b;foxa3;znf185;krt97;fosl1b;lca5;sema4bb	1.99798e-06
cerebellar crest	3/200	0.226151	0.449817	0.154222	0.30675	-1.34819	2.00416	si:dkey-157g16.6;krt4;tnnt3a	0.346964		head kidney	14/200	0.299409	0.999995	0.188372	0.812161	-1.1117	1.34065	lum;lmna;perp;pls3;anxa2a;phlda2;tagln2;gas1a;ehd2b;lgals3b;crybg1a;pleca;klf4;phactr4a	1.99798e-06
floor plate	3/200	0.226151	0.449817	0.154222	0.30675	-1.31534	1.95532	net1;six4a;cdon	0.346964		absorptive cell	13/200	0.407376	0.999995	0.27341	0.999972	-1.46774	1.31806	col28a2a;si:cabz01007794.1;asph;pls3;col18a1a;itga3b;frem3;gas1a;cyt1l;col4a6;lamb4;krt4;capn9	1.99798e-06
adenohypophysis	3/200	0.226151	0.449817	0.154222	0.30675	-1.28757	1.91404	smad1;znf648;si:ch211-207e14.4	0.346964		epiblast	13/200	0.407376	0.999995	0.27341	0.999972	-1.37908	1.23844	etv4;rrbp1a;bmpr1aa;ryk;slc16a1b;asph;col18a1a;spaca4l;mcm6;lims1;farp2;fgfr1a;capn9	1.99798e-06
chondroblast	3/200	0.226151	0.449817	0.154222	0.30675	-1.25657	1.86796	net1;six4a;cdon	0.346964		osteoblast	14/200	0.299409	0.999995	0.188372	0.812161	-0.893424	1.07742	rrbp1a;lmna;asph;pls3;anxa2a;col18a1a;itga3b;lims1;gas1a;ehd2b;smad1;cebpd;s100u;capn9	1.99798e-06
ectodermal cell	3/200	0.226151	0.449817	0.154222	0.30675	-1.18572	1.76264	net1;six4a;cdon	0.346964		ectodermal cell	13/200	0.407376	0.999995	0.27341	0.999972	-1.17014	1.05081	etv4;bmpr1aa;asph;pls3;si:ch73-347e22.8;col18a1a;spaca4l;mcm6;gas1a;znf185;farp2;fgfr1a;capn9	1.99798e-06
gill	3/200	0.226151	0.449817	0.154222	0.30675	-1.15066	1.71051	cd9b;epcam;elf3	0.346964		hypoblast	13/200	0.407376	0.999995	0.27341	0.999972	-0.927379	0.832804	etv4;rrbp1a;bmpr1aa;slc16a1b;asph;col18a1a;spaca4l;mcm6;lims1;znf185;farp2;fgfr1a;capn9	1.99798e-06
endocardium	3/200	0.226151	0.449817	0.154222	0.30675	-1.11604	1.65905	synpo2lb;palld;usp28	0.346964		pharynx	14/200	0.299409	0.999995	0.188372	0.812161	-0.687326	0.828878	esrp1;svopl;bmpr1aa;ryk;si:ch73-347e22.8;spaca4l;znf185;farp2;fgfr1a;myo1eb;ctnnd1;sema4bb;capn9;ctsla	1.99798e-06
ganglion	3/200	0.226151	0.449817	0.154222	0.30675	-1.0786	1.60339	krt4;tnnt3a;cdon	0.346964		floor plate	12/200	0.52583	0.999995	0.377042	0.999972	-1.16408	0.748246	ehd2b;farp2;fgfr1a;col4a6;bmpr1aa;cmn;col9a2;asph;pls3;col18a1a;capn9;frem3	1.99798e-06
duct	3/200	0.226151	0.449817	0.154222	0.30675	-1.06404	1.58176	cdh26.1;smad1;net1	0.346964		cardiac mesenchymal cell	12/200	0.52583	0.999995	0.377042	0.999972	-1.15577	0.742903	macf1a;acsl1b;mylk4b;lmna;map3k15;slc2a1b;anxa2a;phlda2;ackr4b;klf4;lmo7a;phactr4a	1.99798e-06
hatching gland	3/200	0.226151	0.449817	0.154222	0.30675	-0.996508	1.48136	esrp1;gna15.1;eps8l1b	0.346964		mesenchyme	13/200	0.407376	0.999995	0.27341	0.999972	-0.804682	0.722619	etv4;rrbp1a;bmpr1aa;ryk;slc16a1b;asph;col18a1a;mcm6;gas1a;farp2;fgfr1a;gata6;capn9	1.99798e-06
renal vesicle	3/200	0.226151	0.449817	0.154222	0.30675	-0.870407	1.29391	si:dkey-157g16.6;krt4;zgc:171775	0.346964		dorsal axial hypoblast	12/200	0.52583	0.999995	0.377042	0.999972	-1.04163	0.669537	foxa3;mttp;ponzr5;nop56;etv4;farp2;si:zfos-905g2.1;bmpr1aa;gata6;slc16a1b;sema4bb;ctsla	1.99798e-06
intestinal bulb	3/200	0.226151	0.449817	0.154222	0.30675	-0.833311	1.23876	slc7a2;spink4;sb:cb1058	0.346964		skeletal element	13/200	0.407376	0.999995	0.27341	0.999972	-0.744532	0.668604	tnnt2c;acsl1b;asph;rbfox1l;pls3;col18a1a;itga3b;frem3;smad1;col4a6;and1;ldb3b;klhl31	1.99798e-06
neuroepithelial cell	3/200	0.226151	0.449817	0.154222	0.30675	-0.783284	1.16439	btc;six4a;cdon	0.346964		epicardium	12/200	0.52583	0.999995	0.377042	0.999972	-1.03337	0.664225	myo1cb;acsl1b;vegfab;myzap;rbfox1l;map3k15;cox7a1;slc2a1b;ldb3b;itga3b;lmo7a;phactr4a	1.99798e-06
sinoatrial node	3/200	0.226151	0.449817	0.154222	0.30675	-0.747605	1.11135	ldb3a;synpo2lb;usp28	0.346964		endodermal cell	12/200	0.52583	0.999995	0.377042	0.999972	-1.00799	0.647911	nop56;etv4;farp2;rrbp1a;fgfr1a;bmpr1aa;ryk;slc16a1b;myo1eb;ctnnd1;mcm6;ctsla	1.99798e-06
notochord	3/200	0.226151	0.449817	0.154222	0.30675	-0.728703	1.08325	smad1;net1;cdon	0.346964		tendon cell	13/200	0.407376	0.999995	0.27341	0.999972	-0.69711	0.626018	lum;perp;asph;pls3;col18a1a;ehd2b;col4a6;itgb1b.1;and2;cebpd;and1;s100u;si:dkey-102c8.3	1.99798e-06
midbrain neural tube	3/200	0.226151	0.449817	0.154222	0.30675	-0.71954	1.06963	krt4;bcar1;cdon	0.346964		hindbrain neural tube	12/200	0.52583	0.999995	0.377042	0.999972	-0.866725	0.557111	gas1a;tnnt2c;cyt1l;fgfr1a;col28a2a;col4a6;krt4;si:cabz01007794.1;asph;col18a1a;itga3b;frem3	1.99798e-06
notochord posterior region	3/200	0.226151	0.449817	0.154222	0.30675	-0.692247	1.02906	krt4;tnnt3a;zgc:171775	0.346964		myoblast	13/200	0.407376	0.999995	0.27341	0.999972	-0.616027	0.553204	acsl1b;bmpr1aa;asph;rbfox1l;col18a1a;itga3b;mcm6;frem3;farp2;smad1;fgfr1a;klhl31;capn9	1.99798e-06
optic choroid	3/200	0.226151	0.449817	0.154222	0.30675	-0.660193	0.981411	net1;bcar1;cdon	0.346964		lens capsule	12/200	0.52583	0.999995	0.377042	0.999972	-0.792744	0.509558	myo1cb;smad1;rrbp1a;lmna;anxa2a;col18a1a;si:rp71-1g18.13;pleca;itga3b;calca;lims1;mmp15a	1.99798e-06
upper rhombic lip	3/200	0.226151	0.449817	0.154222	0.30675	-0.631596	0.9389	smad1;net1;cdon	0.346964		ventricular epicardium	12/200	0.52583	0.999995	0.377042	0.999972	-0.750303	0.482277	acsl1b;vegfab;mylk4b;myzap;rbfox1l;map3k15;slc2a1b;ldb3b;itga3b;lmo7a;phactr4a;phkg1b	1.99798e-06
presumptive rhombomere 3	3/200	0.226151	0.449817	0.154222	0.30675	-0.63069	0.937553	nkx2.7;smad1;six4a	0.346964		upper rhombic lip	12/200	0.52583	0.999995	0.377042	0.999972	-0.741194	0.476422	gas1a;smad1;rrbp1a;fgfr1a;col4a6;bmpr1aa;asph;pls3;nav2b;col18a1a;itga3b;lims1	1.99798e-06
presumptive rhombomere 4	3/200	0.226151	0.449817	0.154222	0.30675	-0.630243	0.936888	nkx2.7;smad1;six4a	0.346964		lateral line primordium	12/200	0.52583	0.999995	0.377042	0.999972	-0.731953	0.470482	gas1a;farp2;fgfr1a;bmpr1aa;ryk;zgc:174164;myo1eb;asph;ctnnd1;mcm6;capn9;ctsla	1.99798e-06
somite	3/200	0.226151	0.449817	0.154222	0.30675	-0.623451	0.926791	net1;six4a;cdon	0.346964		ventral root	12/200	0.52583	0.999995	0.377042	0.999972	-0.725304	0.466208	cemip;macf1a;trib1;fam83b;pof1b;kif1ab;ptprfa;gdpd3b;atp10b;si:ch211-207j7.2;asap3;areg	1.99798e-06
muscle precursor cell	3/200	0.226151	0.449817	0.154222	0.30675	-0.622011	0.924652	nkx2.7;smad1;six4a	0.346964		atrial myocardium	11/200	0.645051	0.999995	0.493928	0.999972	-1.06315	0.466114	acsl1b;mylk4b;myzap;rbfox1l;map3k15;slc2a1b;ldb3b;itga3b;lmo7a;phactr4a;phkg1b	1.99798e-06
neural crest	3/200	0.226151	0.449817	0.154222	0.30675	-0.602592	0.895784	net1;six4a;cdon	0.346964		somite	12/200	0.52583	0.999995	0.377042	0.999972	-0.715089	0.459643	gas1a;farp2;rrbp1a;fgfr1a;col4a6;bmpr1aa;asph;pls3;col18a1a;itga3b;capn9;frem3	1.99798e-06
optic tectum	3/200	0.226151	0.449817	0.154222	0.30675	-0.584096	0.868289	krt4;bcar1;cdon	0.346964		serous membrane	12/200	0.52583	0.999995	0.377042	0.999972	-0.707144	0.454535	myo1cb;ehd2b;acsl1b;myzap;pls3;map3k15;slc2a1b;anxa2a;itga3b;ackr4b;lmo7a;phactr4a	1.99798e-06
retinal ganglion cell layer	3/200	0.226151	0.449817	0.154222	0.30675	-0.575163	0.855009	si:dkey-157g16.6;krt4;cdon	0.346964		lens fiber cell	12/200	0.52583	0.999995	0.377042	0.999972	-0.681391	0.437982	oclna;plcd1b;cryba2b;farp2;cenpe;lnx2b;fgfr1a;flii;ctnnd1;tjp2a;ctsla;zgc:63569	1.99798e-06
presumptive brain	3/200	0.226151	0.449817	0.154222	0.30675	-0.552369	0.821126	krt4;six4a;cdon	0.346964		simple organ	11/200	0.645051	0.999995	0.493928	0.999972	-0.715917	0.313876	farp2;fgfr1a;bmpr1aa;gata6;asph;col18a1a;itga3b;capn8;mcm6;capn9;krt92	1.99798e-06
optic vesicle	3/200	0.226151	0.449817	0.154222	0.30675	-0.551995	0.820569	net1;bcar1;cdon	0.346964		neuromast support cell	12/200	0.52583	0.999995	0.377042	0.999972	-0.484455	0.311397	btc;pcsk5a;nop56;farp2;fgfr1a;bmpr1aa;ryk;asph;si:ch211-243g18.2;mcm6;lims1;jupa	1.99798e-06
neuromast support cell	3/200	0.226151	0.449817	0.154222	0.30675	-0.545857	0.811444	btc;net1;six4a	0.346964		semicircular canal	12/200	0.52583	0.999995	0.377042	0.999972	-0.475476	0.305625	nop56;farp2;si:zfos-905g2.1;fgfr1a;cdh1;fgf10a;si:ch73-308l14.2;myo1eb;ctnnd1;sap30bp;spaca4l;si:ch211-243g18.2	1.99798e-06
non neural ectoderm	3/200	0.226151	0.449817	0.154222	0.30675	-0.544212	0.808999	net1;six4a;cdon	0.346964		interrenal gland	11/200	0.645051	0.999995	0.493928	0.999972	-0.663164	0.290748	elovl6l;macc1;myof;cenpe;si:ch211-137a8.2;flii;zgc:174164;si:ch211-129c21.1;epcam;hyou1;si:ch211-266i6.3	1.99798e-06
somatic stem cell	3/200	0.226151	0.449817	0.154222	0.30675	-0.539327	0.801738	net1;six4a;cdon	0.346964		lateral line	11/200	0.645051	0.999995	0.493928	0.999972	-0.648085	0.284137	btc;pcsk5a;gas1a;smad1;fgf10a;pls3;col18a1a;si:ch211-243g18.2;itga3b;calml4a;si:dkey-19b23.12	1.99798e-06
ventral telencephalon	3/200	0.226151	0.449817	0.154222	0.30675	-0.419442	0.623523	bcar1;tnnt3a;cdon	0.346964		lateral floor plate	11/200	0.645051	0.999995	0.493928	0.999972	-0.626682	0.274754	foxa3;nrap;nop56;etv4;farp2;fgfr1a;slc16a1b;klhl31;sema4bb;mcm6;ctsla	1.99798e-06
tendon cell	3/200	0.226151	0.449817	0.154222	0.30675	-0.405676	0.603059	net1;bcar1;cdon	0.346964		pigment cell	11/200	0.645051	0.999995	0.493928	0.999972	-0.534464	0.234323	znf185;farp2;fgfr1a;bmpr1aa;asph;pls3;col18a1a;ppl;capn9;tjp2a;si:ch211-264f5.6	1.99798e-06
epiblast	2/200	0.489746	0.671545	0.393141	0.53908	-0.828893	0.591721	net1;six4a	0.172925		endocardial cushion	10/200	0.754366	0.999995	0.6151	0.999972	-0.727422	0.205044	myo1cb;arhgap29a;acsl1b;rbfox1l;pls3;slc2a1b;col18a1a;itga3b;lmo7a;phactr4a	1.99798e-06
forebrain midbrain boundary neural tube	2/200	0.489746	0.671545	0.393141	0.53908	-0.828072	0.591135	btc;six4a	0.172925		myoseptum	11/200	0.645051	0.999995	0.493928	0.999972	-0.431532	0.189195	gas1a;farp2;smad1;rrbp1a;fgfr1a;bmpr1aa;asph;pls3;col18a1a;mcm6;lims1	1.99798e-06
dorsal hypothalamic zone	2/200	0.489746	0.671545	0.393141	0.53908	-0.806723	0.575895	krt4;cdon	0.172925		hindbrain	10/200	0.754366	0.999995	0.6151	0.999972	-0.616199	0.173692	cyt1l;fgfr1a;col4a6;bmpr1aa;krt4;si:cabz01007794.1;asph;col18a1a;mcm6;frem3	1.99798e-06
exocrine cell	2/200	0.489746	0.671545	0.393141	0.53908	-0.796688	0.568731	slc7a2;sb:cb1058	0.172925		mesodermal cell	11/200	0.645051	0.999995	0.493928	0.999972	-0.393472	0.172508	nop56;etv4;farp2;fgfr1a;bmpr1aa;ryk;slc16a1b;ctnnd1;sema4bb;mcm6;ctsla	1.99798e-06
exocrine pancreas	2/200	0.489746	0.671545	0.393141	0.53908	-0.784236	0.559842	slc7a2;sb:cb1058	0.172925		lens	11/200	0.645051	0.999995	0.493928	0.999972	-0.363489	0.159363	oclna;plcd1b;nop56;etv4;farp2;si:zfos-905g2.1;myo1eb;ctnnd1;prtfdc1;ctsla;zgc:63569	1.99798e-06
forebrain midbrain boundary	2/200	0.489746	0.671545	0.393141	0.53908	-0.742652	0.530157	six4a;cdon	0.172925		blastomere	10/200	0.754366	0.999995	0.6151	0.999972	-0.549761	0.154965	farp2;si:zfos-905g2.1;lpcat4;zgc:101744;epcam;ctnnd1;zgc:92313;tjp2a;ctsla;zgc:63569	1.99798e-06
blastodisc	2/200	0.489746	0.671545	0.393141	0.53908	-0.678767	0.484551	si:ch211-129c21.1;epcam	0.172925		embryonic structure	10/200	0.754366	0.999995	0.6151	0.999972	-0.530148	0.149436	nop56;etv4;farp2;si:zfos-905g2.1;fgfr1a;ryk;slc16a1b;ctnnd1;sema4bb;ctsla	1.99798e-06
dorsal root	2/200	0.489746	0.671545	0.393141	0.53908	-0.668937	0.477533	ptprfa;sgcg	0.172925		embryonic cell	10/200	0.754366	0.999995	0.6151	0.999972	-0.521854	0.147099	nop56;etv4;farp2;si:zfos-905g2.1;fgfr1a;slc16a1b;myo1eb;ctnnd1;sema4bb;ctsla	1.99798e-06
female organism	2/200	0.489746	0.671545	0.393141	0.53908	-0.601857	0.429647	si:dkey-79d12.5;si:ch211-129c21.1	0.172925		neuroepithelial cell	10/200	0.754366	0.999995	0.6151	0.999972	-0.464737	0.130999	btc;pcsk5a;gas1a;col4a6;fgf10a;asph;col18a1a;si:ch211-243g18.2;calml4a;si:dkey-19b23.12	1.99798e-06
hindbrain	2/200	0.489746	0.671545	0.393141	0.53908	-0.592077	0.422665	krt4;tnnt3a	0.172925		regenerating tissue	10/200	0.754366	0.999995	0.6151	0.999972	-0.446048	0.125731	gas1a;smad1;col4a6;krt4;asph;pls3;col18a1a;itga3b;mcm6;lims1	1.99798e-06
lamina densa	2/200	0.489746	0.671545	0.393141	0.53908	-0.544986	0.389049	krt4;cdon	0.172925		ventricular myocardium	10/200	0.754366	0.999995	0.6151	0.999972	-0.430065	0.121225	myo1cb;arhgap29a;acsl1b;myzap;gata6;rbfox1l;slc2a1b;itga3b;lmo7a;phactr4a	1.99798e-06
hindbrain neural plate	2/200	0.489746	0.671545	0.393141	0.53908	-0.499164	0.356338	nkx2.7;six4a	0.172925		pericyte	10/200	0.754366	0.999995	0.6151	0.999972	-0.415186	0.117031	myo1cb;ehd2b;cmn;tmprss2;pls3;col18a1a;slc26a1;lims1;slc16a9a;atp1a1a.4	1.99798e-06
megakaryocyte erythroid progenitor cell	2/200	0.489746	0.671545	0.393141	0.53908	-0.460011	0.328387	palld;pfn1	0.172925		unfertilized egg	10/200	0.754366	0.999995	0.6151	0.999972	-0.408538	0.115158	nectin4b;oclna;plcd1b;lnx2b;si:zfos-905g2.1;si:ch211-137a8.2;lpcat4;s100a1;zgc:92313;trim35-29	1.99798e-06
[truncated: 159 more rows]

## Sheet: Table S10
Supplmental Table 10: Anatomical enrichment analysis of Sox17E>Sox17M DARs at 28 hpf (left) and 48 hpf (right)
[truncated: 274 more rows]

## Sheet: Table S12
Supplmental Table 12: Overlap of HCNE human (hg38) and zebrafish (danRer11) genome coordinates with zebrafish ATAC-seq DARs at 28 and 48 hpf, and human H3K27ac AFG, PFG and MHG data.
[truncated: 118,090 more rows]
